# Supplementary material for: Molecular subtypes based on DNA promoter methylation predict prognosis in lung adenocarcinoma patients
Source: publisher site journal article supplement (doi:10.18632/aging.104062), 2020-11-24
Supplement: Supplementary file [file aging-v12i23-104062-supplementary-material-SD2.pdf]

## SUPPLEMENTARY TABLE

**Supplementary Table 2. Functional enrichment analysis and the identified 16 enriched pathways.**

| ID       | Description                                                   | GeneRatio | BgRatio  | pvalue   | p.adjust | qvalue   | geneID                                                                                                                                   | Count |
|----------|---------------------------------------------------------------|-----------|----------|----------|----------|----------|------------------------------------------------------------------------------------------------------------------------------------------|-------|
| hsa05323 | Rheumatoid arthritis                                          | 12/349    | 93/8017  | 0.000662 | 0.127121 | 0.120877 | TGFB3/HLA-DOB/CXCL3/ATP6V1B1/CCL5/ATP6V1G3/HLA-DMA/MMP3/HLA-DRA/HLA-DPB1/ICAM1/CXCL1                                                     | 12    |
| hsa00430 | Taurine and hypotaurine metabolism                            | 4/349     | 11/8017  | 0.000913 | 0.127121 | 0.120877 | GGT1/GGT6/GGT5/GAD2                                                                                                                      | 4     |
| hsa04061 | Viral protein interaction with cytokine and cytokine receptor | 12/349    | 100/8017 | 0.001271 | 0.127121 | 0.120877 | CX3CR1/CSF1R/CXCL3/CCL5/TNFRSF10D/CXCL13/CXCL14/CX3CL1/CCL25/IL20/CXCL1/CCR8                                                             | 12    |
| hsa04064 | NF-kappa B signaling pathway                                  | 12/349    | 104/8017 | 0.00179  | 0.134274 | 0.127678 | LCK/PIDD1/CXCL3/BLNK/TRAF1/ATM/ICAM1/LY96/CXCL1/TAB1/TIRAP/CARD11                                                                        | 12    |
| hsa04940 | Type I diabetes mellitus                                      | 7/349     | 43/8017  | 0.002319 | 0.139159 | 0.132323 | FASLG/HLA-DOB/PTPRN/HLA-DMA/GAD2/HLA-DRA/HLA-DPB1                                                                                        | 7     |
| hsa05166 | Human T-cell leukemia virus 1 infection                       | 19/349    | 219/8017 | 0.003147 | 0.157372 | 0.149642 | PTTG2/LCK/MSX1/TGFB3/ANAPC2/HLA-DOB/HRAS/CDK2/CDC23/SLC25A31/E2F1/HLA-DMA/CD3G/HLA-DRA/HLA-DPB1/ATM/ICAM1/E2F2/VAC14                     | 19    |
| hsa05169 | Epstein-Barr virus infection                                  | 17/349    | 201/8017 | 0.006557 | 0.281035 | 0.26723  | HLA-DOB/PSMC5/CDK2/CD247/NFKBIB/USP7/RUNX3/E2F1/HLA-DMA/CD3G/BLNK/SKP2/HLA-DRA/HLA-DPB1/ICAM1/E2F2/TAB1                                  | 17    |
| hsa00920 | Sulfur metabolism                                             | 3/349     | 10/8017  | 0.00781  | 0.292863 | 0.278477 | SUOX/PAPSS1/SELENBP1                                                                                                                     | 3     |
| hsa05145 | Toxoplasmosis                                                 | 11/349    | 112/8017 | 0.00933  | 0.310994 | 0.295717 | TGFB3/HLA-DOB/LAMC1/NFKBIB/HLA-DMA/BIRC7/HLA-DRA/HLA-DPB1/LY96/HSPA6/TAB1                                                                | 11    |
| hsa05202 | Transcriptional misregulation in cancer                       | 15/349    | 186/8017 | 0.015514 | 0.380094 | 0.361422 | SMAD1/RUNX2/HMGA2/CSF1R/PPARG/NUPR1/HHEX/PTK2/JUP/MITF/MMP3/TRAF1/ATM/WT1/LDB1                                                           | 15    |
| hsa04060 | Cytokine-cytokine receptor interaction                        | 21/349    | 294/8017 | 0.017276 | 0.380094 | 0.361422 | FASLG/TGFB3/GDF5/CX3CR1/CSF1R/CXCL3/TNFSF18/IL1F10/CCL5/TNFSF15/TNFRSF10D/TNFSF12/CXCL17/CXCL13/CXCL14/CX3CL1/CCL25/IL20/IL32/CXCL1/CCR8 | 21    |
| hsa04658 | Th1 and Th2 cell differentiation                              | 9/349     | 92/8017  | 0.018292 | 0.380094 | 0.361422 | LCK/HLA-DOB/CD247/NFKBIB/RUNX3/HLA-DMA/CD3G/HLA-DRA/HLA-DPB1                                                                             | 9     |
| hsa05222 | Small cell lung cancer                                        | 9/349     | 92/8017  | 0.018292 | 0.380094 | 0.361422 | LAMC1/CDK2/PTK2/E2F1/BIRC7/SKP2/TRAF1/FN1/E2F2                                                                                           | 9     |
| hsa04110 | Cell cycle                                                    | 11/349    | 124/8017 | 0.018992 | 0.380094 | 0.361422 | PTTG2/TGFB3/ANAPC2/CDK2/CDC23/E2F1/CDC14A/SKP2/ATM/E2F2/MCM3                                                                             | 11    |

---

|          |                             |       |         |          |          |          |                                               |   |
|----------|-----------------------------|-------|---------|----------|----------|----------|-----------------------------------------------|---|
| hsa00590 | Arachidonic acid metabolism | 7/349 | 63/8017 | 0.019005 | 0.380094 | 0.361422 | CBR1/GGT1/ALOX15B/GGT5/PLA2G12B/PLA2G5/CYP2J2 | 7 |
| hsa05330 | Allograft rejection         | 5/349 | 38/8017 | 0.023414 | 0.424015 | 0.403186 | FASLG/HLA-DOB/HLA-DMA/HLA-DRA/HLA-DPB1        | 5 |

---
