# Supplementary material for: Molecular subtypes based on DNA promoter methylation predict prognosis in lung adenocarcinoma patients
Source: Aging (Albany NY). 2020 Nov 24;12(23):23917–30. doi: 10.18632/aging.104062 (PMC7762488; doi:10.18632/aging.104062)
Supplement: Supplementary Table 1 [file aging-12-104062-s001.xlsx]

## Sheet: 1
Supplementary Table 1. Multivariate Cox regression analysis of the 774 methylation.
id	futime	fustat	cg00071250D2:P2D2:V2D2:AB2A1D2:L2D2:AH2A1D2:L2D2:AO2A1D2:L2D2:AV2A1D2:L2D2:BC2A1D2:D2:HC2	cg00134539	cg00176210	cg00184884	cg00226923	cg00256074	cg00268338	cg00350296	cg00398048	cg00513220	cg00519208	cg00729275	cg00754617	cg00884529	cg00986320	cg00987379	cg01026744	cg01027739	cg01043831	cg01091565	cg01103836	cg01110312	cg01127428	cg01143454	cg01169610	cg01195053	cg01282074	cg01305547	cg01348086	cg01511567	cg01525376	cg01566404	cg01653445	cg01657207	cg01727899	cg01739167	cg01803059	cg01818492	cg01820777	cg01882150	cg01910481	cg01940867	cg01946401	cg01962969	cg01968793	cg01993576	cg02059813
TCGA-L9-A5IP	58	1	0.737961	0.658567	0.572502	0.0256997	0.609346	0.677304	0.0418064	0.615383	0.163754	0.105695	0.323813	0.330557	0.815006	0.0884857	0.907519	0.0799062	0.355867	0.331951	0.806051	0.579613	0.906185	0.361505	0.845439	0.0682374	0.865319	0.0301691	0.0158571	0.840817	0.29951	0.235934	0.315134	0.818131	0.0704635	0.119939	0.578097	0.580176	0.059307	0.01549	0.142034	0.0940197	0.673531	0.0317752	0.782329	0.0411401	0.185792	0.601921	0.929054
TCGA-78-7161	291	1	0.790244	0.905675	0.790444	0.0396891	0.667749	0.912926	0.0546201	0.672395	0.255921	0.060728	0.62705	0.173707	0.926594	0.106055	0.937875	0.059485	0.694729	0.0675654	0.580157	0.672002	0.918932	0.542955	0.886843	0.417001	0.878792	0.0407998	0.110416	0.84426	0.399507	0.092124	0.50592	0.83145	0.0614287	0.102503	0.436358	0.775223	0.104078	0.0219566	0.103684	0.0865382	0.959395	0.0375203	0.149266	0.0827084	0.351835	0.121486	0.929656
TCGA-86-8055	124	1	0.640271	0.759615	0.545957	0.0295442	0.71456	0.847857	0.0472879	0.480797	0.204484	0.156118	0.72293	0.455911	0.745991	0.114947	0.904252	0.0685106	0.62204	0.0940917	0.844877	0.685414	0.866661	0.51639	0.863626	0.1558	0.803213	0.0101514	0.0367854	0.861238	0.391919	0.10203	0.611868	0.521223	0.0857438	0.137522	0.828524	0.594255	0.104766	0.0124288	0.167055	0.0952073	0.882823	0.0342866	0.352072	0.0580747	0.246784	0.329313	0.925814
TCGA-55-6979	237	1	0.60077	0.760154	0.455843	0.0438591	0.758526	0.895856	0.0660114	0.382479	0.319729	0.194738	0.845075	0.492719	0.729938	0.11164	0.924013	0.138654	0.737303	0.123456	0.768704	0.702471	0.906496	0.685093	0.87448	0.198383	0.784782	0.0167118	0.067389	0.859799	0.413451	0.164855	0.468479	0.805883	0.113347	0.278547	0.796407	0.551268	0.264616	0.0270008	0.10443	0.121228	0.894656	0.0522906	0.558742	0.0797477	0.250433	0.403142	0.952087
TCGA-50-8457	1125	0	0.667615	0.770202	0.445361	0.0422898	0.658712	0.855276	0.0754872	0.368897	0.349103	0.211913	0.818551	0.40202	0.765817	0.104153	0.88122	0.0995981	0.515589	0.11032	0.708298	0.709499	0.89182	0.698599	0.865998	0.305793	0.802481	0.0366322	0.08267	0.823265	0.509016	0.136771	0.481585	0.835217	0.105095	0.310082	0.863767	0.544655	0.19544	0.0210964	0.228638	0.113056	0.899882	0.0577811	0.536588	0.0775878	0.332055	0.26174	0.933102
TCGA-05-5428	670	0	0.787894	0.794344	0.503686	0.0337423	0.718963	0.835211	0.0601696	0.307335	0.350045	0.537282	0.857378	0.256581	0.794911	0.110965	0.889822	0.0557934	0.96093	0.100264	0.60242	0.541162	0.902375	0.668058	0.886521	0.230887	0.778096	0.0127485	0.0882154	0.838224	0.275353	0.100465	0.390553	0.670268	0.472669	0.339499	0.843155	0.568306	0.109187	0.06386	0.0929718	0.111837	0.744079	0.0546017	0.290611	0.379182	0.440204	0.252651	0.843376
TCGA-50-5935	653	1	0.763493	0.793465	0.68978	0.0296203	0.852008	0.923214	0.0638038	0.661311	0.381934	0.171518	0.831054	0.402433	0.837651	0.107077	0.924382	0.0774816	0.694767	0.0635762	0.600676	0.852152	0.902051	0.739552	0.878697	0.583699	0.866208	0.0458554	0.270081	0.827298	0.648128	0.0811516	0.632696	0.860074	0.112876	0.244555	0.844564	0.726075	0.137155	0.0296221	0.174442	0.113151	0.898756	0.0462861	0.335528	0.074115	0.188176	0.231541	0.935984
TCGA-35-5375	264	0	0.682119	0.823644	0.704089	0.0343205	0.777135	0.78395	0.0422361	0.632064	0.19062	0.119659	0.841226	0.40063	0.795975	0.0924807	0.887888	0.0539168	0.400913	0.243237	0.618814	0.632348	0.892838	0.576875	0.87705	0.358066	0.827918	0.0358883	0.429981	0.824503	0.627989	0.228027	0.649562	0.811841	0.0697128	0.124665	0.752781	0.704471	0.133744	0.0228591	0.266027	0.105195	0.82734	0.045173	0.820019	0.0596639	0.156089	0.704848	0.92067
TCGA-99-8025	1060	0	0.619312	0.694513	0.408199	0.0484025	0.515898	0.921462	0.0527347	0.306119	0.114775	0.0985183	0.876198	0.256496	0.84895	0.114813	0.918065	0.0539434	0.533096	0.0517589	0.79664	0.415162	0.907916	0.734764	0.834672	0.126821	0.841133	0.0330806	0.372981	0.897151	0.347593	0.0778339	0.340254	0.769081	0.365431	0.114257	0.741846	0.575359	0.0915227	0.203455	0.0589454	0.104469	0.887231	0.0399998	0.272875	0.049516	0.547955	0.257611	0.935069
TCGA-44-6145	595	0	0.562674	0.615944	0.479988	0.0377093	0.661572	0.886405	0.068454	0.435055	0.324535	0.215096	0.61519	0.589034	0.702637	0.110033	0.914881	0.13615	0.672453	0.0863896	0.758889	0.644736	0.877348	0.729879	0.863625	0.207655	0.676664	0.0311099	0.0417664	0.880355	0.33591	0.229426	0.373894	0.821495	0.0874346	0.244386	0.824658	0.475805	0.245076	0.0184295	0.108626	0.0970538	0.864009	0.0479302	0.741075	0.052399	0.484064	0.376309	0.898465
TCGA-86-7954	605	0	0.603204	0.710852	0.468087	0.0400584	0.823644	0.89526	0.0684379	0.474998	0.1773	0.151772	0.846815	0.573258	0.758196	0.106982	0.925407	0.102331	0.547273	0.0711977	0.840915	0.806988	0.89252	0.707718	0.875039	0.412045	0.897026	0.044362	0.0887797	0.792815	0.449708	0.113105	0.550509	0.639418	0.0978255	0.189592	0.822813	0.446651	0.173073	0.02404	0.117977	0.119353	0.86237	0.0438068	0.390175	0.0594928	0.18868	0.350728	0.923441
TCGA-44-2666	97	1	0.734317	0.762906	0.499166	0.0362931	0.689856	0.868972	0.0656281	0.584174	0.194523	0.125511	0.833936	0.465745	0.703439	0.0984578	0.920876	0.0574841	0.518192	0.149254	0.670058	0.785763	0.884543	0.359207	0.857342	0.542897	0.790341	0.0599925	0.187753	0.822544	0.616282	0.107853	0.601289	0.721561	0.132784	0.121615	0.832626	0.690344	0.0762424	0.0292507	0.332296	0.114132	0.892748	0.0474425	0.556342	0.0618799	0.328549	0.255058	0.918032
TCGA-97-A4M3	540	0	0.770942	0.880502	0.62522	0.0392868	0.781611	0.876022	0.0583084	0.563606	0.352223	0.130276	0.865331	0.598447	0.804555	0.0990869	0.94244	0.0643524	0.617043	0.0581476	0.519367	0.859108	0.879399	0.542744	0.855774	0.524216	0.323029	0.0662054	0.266257	0.857312	0.412862	0.0862786	0.655738	0.75955	0.0912634	0.345264	0.803148	0.746062	0.0909724	0.0301757	0.285488	0.120085	0.912593	0.0550276	0.328479	0.0618619	0.176382	0.209075	0.948957
TCGA-05-4424	913	0	0.630886	0.763735	0.564888	0.0448076	0.744591	0.894014	0.0582595	0.526547	0.183335	0.155524	0.755847	0.51024	0.747371	0.101287	0.899418	0.0814702	0.670592	0.111879	0.72613	0.704284	0.884131	0.589581	0.878419	0.438478	0.840237	0.0321102	0.301108	0.836096	0.58327	0.156812	0.529119	0.633329	0.132129	0.182481	0.661434	0.505324	0.107891	0.0289259	0.137772	0.0941574	0.888268	0.0643171	0.684952	0.0711805	0.221819	0.368512	0.91737
TCGA-55-6986	3261	0	0.637863	0.713197	0.518379	0.0379354	0.693406	0.869187	0.064154	0.528087	0.219332	0.165077	0.826037	0.611872	0.663151	0.101696	0.919912	0.0756268	0.563684	0.0868543	0.65393	0.790311	0.894039	0.597385	0.874892	0.327063	0.621637	0.0261176	0.29348	0.854346	0.366011	0.135591	0.516854	0.808231	0.0925993	0.251213	0.836085	0.571338	0.130567	0.0348014	0.201795	0.12594	0.911045	0.0365952	0.449021	0.0649431	0.495018	0.350751	0.926136
TCGA-50-6595	189	1	0.729845	0.814364	0.570456	0.0295841	0.875785	0.889046	0.0910721	0.281414	0.471098	0.143111	0.72925	0.613459	0.799661	0.107308	0.91144	0.0814603	0.630859	0.117009	0.835553	0.827578	0.918	0.638738	0.883245	0.141852	0.852202	0.01285	0.081995	0.875699	0.414614	0.231527	0.474813	0.804193	0.108532	0.26647	0.803715	0.547287	0.146289	0.022131	0.178565	0.126809	0.866995	0.0434667	0.482041	0.0732438	0.206117	0.443035	0.931734
TCGA-MN-A4N1	827	0	0.738802	0.846256	0.605515	0.034605	0.45287	0.911324	0.0504582	0.377111	0.191513	0.401643	0.78412	0.268136	0.77039	0.0954996	0.928046	0.0625635	0.736997	0.105644	0.571665	0.792361	0.898787	0.591431	0.886418	0.515843	0.538337	0.0659975	0.190415	0.873401	0.57054	0.0611516	0.481867	0.813939	0.145758	0.102536	0.864086	0.656506	0.0538469	0.0196967	0.113272	0.110206	0.918822	0.0388921	0.220617	0.0544189	0.376301	0.175133	0.923233
TCGA-86-6562	376	1	0.78559	0.842827	0.514996	0.0402145	0.81335	0.897732	0.058252	0.489736	0.322672	0.129312	0.824839	0.349625	0.850865	0.117384	0.952196	0.0505036	0.687878	0.0789744	0.698504	0.836343	0.90798	0.691701	0.889763	0.344779	0.839481	0.0426349	0.0407605	0.843712	0.457399	0.116307	0.560609	0.796986	0.0839386	0.252639	0.843381	0.714701	0.0938199	0.0179011	0.0946478	0.108502	0.913054	0.0347239	0.290022	0.0653163	0.212723	0.263734	0.945221
TCGA-55-6984	760	1	0.690895	0.801898	0.396583	0.0557184	0.732707	0.808426	0.0660346	0.549276	0.309957	0.216986	0.581352	0.560837	0.805165	0.125914	0.935036	0.0793365	0.610175	0.167676	0.860114	0.651374	0.882985	0.627375	0.878876	0.282634	0.841485	0.0590417	0.0690546	0.861937	0.324074	0.196457	0.511615	0.840722	0.109209	0.184251	0.84141	0.584593	0.149802	0.0417436	0.166375	0.157022	0.926923	0.0582686	0.701128	0.086809	0.290805	0.613559	0.902665
TCGA-67-6215	174	0	0.772911	0.869872	0.529207	0.0417651	0.746141	0.625147	0.0743874	0.148901	0.128662	0.0688325	0.775951	0.357695	0.887552	0.115751	0.856817	0.0399747	0.600084	0.0776619	0.615922	0.637983	0.891342	0.661067	0.884426	0.359169	0.465563	0.0158617	0.0730809	0.865479	0.369499	0.170555	0.304136	0.844045	0.0783969	0.114665	0.858357	0.722853	0.0760038	0.0203352	0.084342	0.103073	0.939951	0.0346885	0.249393	0.0533679	0.443228	0.229488	0.950299
TCGA-50-5944	1750	0	0.777834	0.868325	0.468318	0.0446016	0.812902	0.909967	0.0646694	0.608598	0.226626	0.120092	0.76242	0.195823	0.86437	0.084469	0.919281	0.0581843	0.566511	0.0809296	0.560804	0.656854	0.902733	0.548095	0.851153	0.497671	0.46388	0.0223926	0.0603567	0.787182	0.570919	0.114896	0.633548	0.76533	0.0901407	0.0671338	0.80329	0.609593	0.0967107	0.0392581	0.17851	0.145625	0.910514	0.05471	0.236103	0.0556649	0.347876	0.172102	0.931732
TCGA-78-7542	321	1	0.710065	0.526905	0.604068	0.029263	0.784166	0.684307	0.0569328	0.345513	0.235869	0.139545	0.436337	0.307922	0.75378	0.121097	0.80661	0.0891124	0.585605	0.454232	0.548416	0.764102	0.914779	0.592274	0.876545	0.143706	0.675365	0.0131409	0.0417137	0.868854	0.287353	0.180918	0.438334	0.845268	0.0843565	0.319731	0.58171	0.588071	0.092178	0.0215344	0.114258	0.1013	0.500907	0.0251697	0.688833	0.0640742	0.296089	0.468267	0.92959
TCGA-44-A47G	351	0	0.442455	0.674788	0.433667	0.0453985	0.644295	0.866964	0.077693	0.475975	0.310791	0.305271	0.723912	0.382787	0.637356	0.101996	0.860682	0.13455	0.625787	0.112481	0.736363	0.777935	0.864827	0.631178	0.83798	0.258484	0.632387	0.0652695	0.127976	0.863918	0.291313	0.155614	0.356358	0.7574	0.17874	0.23719	0.778489	0.445648	0.233895	0.0293236	0.202853	0.129855	0.795256	0.0455909	0.615622	0.0732569	0.401094	0.365943	0.924549
TCGA-99-8032	44	0	0.627715	0.814047	0.563761	0.0317905	0.44975	0.890834	0.0529581	0.572985	0.161506	0.168538	0.800111	0.324857	0.694939	0.0995606	0.9066	0.0627805	0.550103	0.0701276	0.63536	0.739617	0.84322	0.442777	0.846909	0.342036	0.666284	0.0411784	0.181914	0.880395	0.286819	0.177873	0.516578	0.675952	0.06507	0.130877	0.783721	0.607416	0.114845	0.0191879	0.0935532	0.0873408	0.905149	0.0356697	0.38967	0.0793484	0.228491	0.203009	0.937855
TCGA-95-7944	377	0	0.520905	0.680744	0.466313	0.0485044	0.845486	0.892554	0.0618857	0.508314	0.491885	0.202651	0.851386	0.505593	0.770459	0.0996341	0.880135	0.160317	0.66652	0.161821	0.778574	0.883551	0.89758	0.796297	0.859404	0.168109	0.881979	0.0437112	0.0474961	0.85265	0.432921	0.187005	0.460316	0.84234	0.107866	0.42899	0.840141	0.462942	0.293761	0.0294286	0.121074	0.107445	0.7925	0.0539294	0.729674	0.056312	0.235066	0.521255	0.925754
TCGA-69-7973	230	0	0.723742	0.821389	0.569433	0.0306063	0.556075	0.891946	0.0568631	0.538862	0.305246	0.142341	0.834609	0.199172	0.861875	0.107444	0.91897	0.0551453	0.608927	0.0556324	0.627701	0.877436	0.883077	0.564415	0.853888	0.56487	0.832725	0.0596856	0.054736	0.829162	0.235818	0.0874981	0.60434	0.675082	0.0719796	0.114037	0.782	0.45386	0.149756	0.0280037	0.107182	0.11001	0.879243	0.0473497	0.313956	0.0547254	0.361783	0.229284	0.914402
TCGA-44-7672	719	0	0.610219	0.779276	0.502011	0.0449667	0.676967	0.903108	0.0657847	0.468345	0.290092	0.224461	0.782279	0.462936	0.740454	0.0981346	0.907592	0.122941	0.62598	0.151846	0.760181	0.736387	0.900353	0.718613	0.883593	0.333739	0.876019	0.0226982	0.132867	0.885045	0.357235	0.20019	0.510133	0.86235	0.138045	0.257982	0.832886	0.555908	0.215675	0.030387	0.227558	0.137793	0.842746	0.0554227	0.592643	0.0779359	0.483833	0.405711	0.945792
TCGA-97-A4M1	601	0	0.636673	0.799131	0.33958	0.0299226	0.623722	0.848143	0.0548524	0.410587	0.172114	0.0850946	0.757962	0.287879	0.822533	0.0793	0.90388	0.0586632	0.48422	0.0584192	0.540775	0.63335	0.904569	0.512909	0.851147	0.325121	0.517269	0.0349398	0.057075	0.838115	0.419247	0.0914483	0.425548	0.532299	0.0766558	0.106257	0.859609	0.652789	0.0850251	0.0158156	0.125578	0.117143	0.909418	0.0344006	0.443412	0.0468515	0.206967	0.280684	0.923641
TCGA-69-7764	414	0	0.726136	0.861426	0.475619	0.0344562	0.789468	0.872492	0.0625125	0.673308	0.149023	0.119085	0.862908	0.210596	0.839989	0.106198	0.897159	0.0624226	0.829658	0.0751498	0.464408	0.780562	0.913748	0.387465	0.852445	0.482673	0.691884	0.0310532	0.0588679	0.804788	0.650934	0.120209	0.605401	0.748128	0.093888	0.145434	0.867142	0.620587	0.201073	0.0319302	0.158338	0.100155	0.887236	0.0476017	0.259159	0.0616214	0.302494	0.164993	0.934521
TCGA-44-5643	1013	0	0.594864	0.651791	0.42724	0.0270725	0.716496	0.8728	0.0556199	0.540417	0.20181	0.153572	0.62036	0.520025	0.772588	0.0947206	0.860724	0.119997	0.76559	0.0847491	0.698103	0.742092	0.907407	0.542771	0.884693	0.212602	0.761044	0.0264949	0.0476489	0.768691	0.348496	0.173867	0.432721	0.725325	0.0920822	0.237538	0.796783	0.461549	0.194862	0.0212362	0.0997366	0.0799757	0.657622	0.0366523	0.750633	0.0675831	0.204752	0.488536	0.933469
TCGA-55-7995	889	0	0.589297	0.785704	0.478154	0.0365686	0.740486	0.852386	0.055933	0.366471	0.311064	0.115555	0.75257	0.476966	0.796656	0.0917598	0.673463	0.0953782	0.604936	0.0806819	0.697072	0.616671	0.894439	0.54503	0.872401	0.528515	0.837271	0.0214661	0.0794644	0.818093	0.495785	0.0930576	0.500708	0.840015	0.0780454	0.240526	0.784778	0.554735	0.171876	0.0351423	0.138752	0.105299	0.92988	0.0371507	0.578356	0.0627749	0.274233	0.298324	0.887351
TCGA-44-A4SS	415	0	0.503516	0.587778	0.505125	0.0524116	0.805256	0.833775	0.0554975	0.46141	0.315328	0.196568	0.595039	0.522531	0.756026	0.0838518	0.903183	0.124106	0.571355	0.226097	0.81139	0.761283	0.892007	0.667634	0.868812	0.186688	0.857581	0.0428388	0.0465639	0.859922	0.274268	0.12656	0.413668	0.789402	0.132998	0.280027	0.845301	0.49458	0.257546	0.0208324	0.0887559	0.13368	0.699771	0.0404371	0.763096	0.0507819	0.355084	0.427609	0.921559
TCGA-78-7150	666	1	0.753067	0.866268	0.302638	0.027464	0.858913	0.85806	0.0540015	0.643671	0.269351	0.0884128	0.708824	0.348265	0.810977	0.0960784	0.933539	0.0620083	0.683496	0.0689933	0.84117	0.815491	0.905612	0.384973	0.90124	0.220763	0.883383	0.0514941	0.0654902	0.794473	0.617019	0.0949251	0.616782	0.821967	0.0499164	0.0940571	0.782814	0.714167	0.153287	0.0204379	0.225403	0.0807261	0.72485	0.032842	0.764369	0.0396241	0.135105	0.141714	0.952583
TCGA-86-8669	938	0	0.50325	0.770703	0.618922	0.037408	0.746263	0.895825	0.0641596	0.426671	0.259334	0.203264	0.664756	0.721014	0.821737	0.116846	0.82533	0.0723266	0.866129	0.0824863	0.381574	0.540196	0.884375	0.506525	0.847225	0.34357	0.904844	0.0138519	0.0534096	0.83581	0.398672	0.123376	0.552658	0.664412	0.0907248	0.19231	0.766484	0.499424	0.180152	0.0272794	0.0911954	0.119244	0.941333	0.0465161	0.300276	0.0802729	0.242358	0.216788	0.926361
TCGA-55-8094	541	0	0.695535	0.873985	0.208105	0.0251367	0.809485	0.857855	0.06936	0.4395	0.534797	0.0670249	0.18396	0.133759	0.865942	0.104136	0.439184	0.0453276	0.604922	0.0887485	0.474221	0.827761	0.902239	0.520516	0.836937	0.099592	0.52394	0.0228947	0.034702	0.869536	0.38769	0.397179	0.640961	0.837209	0.0382591	0.464294	0.842675	0.721395	0.112163	0.0211035	0.115972	0.0870537	0.932207	0.0397846	0.176672	0.0719899	0.632551	0.406371	0.920413
TCGA-78-7163	7248	0	0.75897	0.80421	0.483228	0.0440374	0.597645	0.873946	0.0476157	0.182011	0.0853599	0.199456	0.850624	0.24159	0.810216	0.114041	0.329418	0.0857079	0.647333	0.0644334	0.292465	0.42192	0.8979	0.630803	0.874017	0.492328	0.31455	0.037362	0.0305845	0.877008	0.277275	0.0564488	0.394176	0.637538	0.0907172	0.767663	0.896367	0.43576	0.0967278	0.0228439	0.0721626	0.0856964	0.875782	0.0458748	0.398382	0.0624022	0.66774	0.247795	0.927641
TCGA-78-8640	7062	0	0.676077	0.766543	0.495572	0.030121	0.676467	0.877096	0.0543958	0.391183	0.182434	0.143789	0.836975	0.407816	0.840804	0.104156	0.943792	0.0766705	0.596	0.0647312	0.746468	0.630719	0.900369	0.524061	0.83242	0.499159	0.836964	0.0457847	0.326569	0.836154	0.521581	0.098444	0.548343	0.772191	0.101623	0.131764	0.833267	0.521308	0.1309	0.0241392	0.0994364	0.0924764	0.872211	0.0417122	0.742076	0.0636968	0.236387	0.277681	0.682361
TCGA-MP-A4TA	950	1	0.606344	0.666269	0.482743	0.0303779	0.671318	0.877652	0.0467662	0.354575	0.197163	0.15358	0.733091	0.574532	0.650863	0.0680293	0.890531	0.0730302	0.624546	0.0830124	0.819906	0.705201	0.899163	0.524771	0.882048	0.152165	0.869838	0.0655247	0.0229888	0.889594	0.281946	0.0860824	0.373592	0.673716	0.0629544	0.138316	0.677007	0.42763	0.179696	0.0109937	0.0820268	0.0863536	0.870674	0.0360303	0.558604	0.0345616	0.329484	0.228495	0.925481
TCGA-55-6982	995	1	0.672539	0.81575	0.565334	0.0351791	0.739097	0.929639	0.0539191	0.506959	0.27296	0.136899	0.767733	0.413836	0.825145	0.0957518	0.918131	0.0624977	0.579205	0.0901239	0.845437	0.780985	0.897382	0.647745	0.870837	0.325729	0.864721	0.0195601	0.051382	0.906581	0.42202	0.148118	0.628603	0.794506	0.0831532	0.191855	0.822705	0.592976	0.114788	0.0159103	0.120804	0.0979912	0.900038	0.043804	0.400132	0.0556758	0.243789	0.295213	0.936222
TCGA-50-5942	1847	0	0.750984	0.79429	0.583087	0.045447	0.798312	0.916257	0.0624183	0.449206	0.287122	0.126259	0.876794	0.217617	0.82268	0.102403	0.932293	0.0738386	0.614283	0.0937687	0.379899	0.689612	0.910886	0.628036	0.867402	0.506191	0.716633	0.0319205	0.152163	0.884933	0.562803	0.134075	0.62761	0.767462	0.185584	0.619668	0.880951	0.765276	0.0698348	0.0192008	0.120575	0.144182	0.891634	0.0450206	0.290886	0.0760885	0.469453	0.473081	0.924591
TCGA-55-8085	904	0	0.62565	0.719331	0.442766	0.0239108	0.745267	0.873826	0.0519082	0.244584	0.201001	0.133812	0.809213	0.324412	0.757777	0.100136	0.866845	0.091128	0.544705	0.0732879	0.541771	0.613902	0.874961	0.591406	0.84247	0.31781	0.542955	0.0269388	0.0357204	0.866122	0.241928	0.164313	0.457803	0.450136	0.0682859	0.287429	0.661641	0.57817	0.103323	0.0165894	0.100868	0.108744	0.859637	0.0392638	0.209439	0.0614064	0.194023	0.220028	0.929851
TCGA-97-A4M7	629	0	0.590499	0.740831	0.493031	0.037401	0.716032	0.895698	0.060469	0.536035	0.166671	0.143982	0.778552	0.397436	0.777929	0.0886387	0.926021	0.0915584	0.580681	0.106556	0.697322	0.778067	0.913792	0.618196	0.897317	0.248349	0.796381	0.0208997	0.0620817	0.879812	0.319879	0.0993698	0.436813	0.586628	0.098047	0.318855	0.778401	0.51891	0.14342	0.024146	0.116366	0.114539	0.879412	0.0377581	0.470428	0.0473171	0.457493	0.314508	0.9503
TCGA-78-7146	173	1	0.779101	0.851231	0.662455	0.0389192	0.905937	0.914205	0.0502935	0.40383	0.488815	0.100846	0.473316	0.775485	0.883566	0.112723	0.931117	0.0950948	0.608174	0.420541	0.904101	0.801735	0.914354	0.688992	0.874424	0.076719	0.532511	0.0356358	0.0494119	0.902824	0.418459	0.198783	0.661038	0.846412	0.0700084	0.136851	0.849031	0.74434	0.130236	0.0288488	0.132101	0.103467	0.908246	0.0319801	0.200667	0.07192	0.176811	0.378829	0.923126
TCGA-62-8394	139	1	0.745595	0.816532	0.450944	0.038578	0.73478	0.87458	0.0597089	0.548744	0.293354	0.113611	0.872092	0.470701	0.779001	0.107121	0.88318	0.0777007	0.51924	0.0677868	0.75692	0.747697	0.899463	0.572682	0.86773	0.199696	0.795218	0.0521583	0.040573	0.789236	0.492892	0.0903939	0.658253	0.403007	0.0721616	0.169273	0.693201	0.713318	0.127958	0.0252995	0.10911	0.116411	0.869907	0.0480378	0.461839	0.0743712	0.151912	0.263902	0.897264
TCGA-L4-A4E5	578	0	0.670528	0.840614	0.529798	0.0370465	0.772269	0.900674	0.0653591	0.66955	0.522891	0.166727	0.878028	0.287591	0.781675	0.0959848	0.88795	0.0978783	0.456386	0.0926912	0.637772	0.620189	0.905042	0.601395	0.86822	0.258127	0.876425	0.0673681	0.103424	0.845491	0.505945	0.10433	0.665946	0.840308	0.108745	0.158213	0.503869	0.638922	0.147091	0.0296105	0.0911811	0.103708	0.875573	0.0454889	0.459336	0.064934	0.626017	0.261436	0.919906
TCGA-50-8460	829	0	0.640427	0.728764	0.508045	0.0379955	0.705399	0.912579	0.0400163	0.416283	0.118497	0.190524	0.864828	0.349635	0.77513	0.101721	0.894324	0.0742502	0.572637	0.119485	0.594144	0.657127	0.87603	0.650525	0.888449	0.310205	0.57224	0.0533911	0.237627	0.821752	0.451227	0.0973266	0.517562	0.848234	0.102323	0.188962	0.788209	0.59167	0.214112	0.0418829	0.151862	0.112524	0.900139	0.0413526	0.524539	0.0754641	0.239595	0.376013	0.910046
TCGA-S2-AA1A	513	0	0.538444	0.663165	0.343667	0.027571	0.56146	0.868942	0.0459337	0.277967	0.13353	0.190955	0.649763	0.325718	0.723616	0.0740541	0.884115	0.0746554	0.48823	0.160556	0.808521	0.744386	0.856573	0.641491	0.834963	0.269576	0.834244	0.0504557	0.0472236	0.859943	0.231994	0.123501	0.381346	0.579584	0.136775	0.121829	0.819143	0.362306	0.112108	0.0162047	0.0925562	0.0980957	0.85472	0.0383916	0.527952	0.0428674	0.2111	0.28364	0.902235
TCGA-44-6774	658	0	0.623027	0.682459	0.523903	0.0429899	0.548077	0.857374	0.0661686	0.197675	0.354371	0.126464	0.757408	0.443777	0.648117	0.0898221	0.918214	0.0787114	0.601283	0.0995766	0.703576	0.695654	0.882482	0.604096	0.881451	0.169755	0.748672	0.0457019	0.0829708	0.853416	0.370643	0.112266	0.429825	0.623438	0.0985924	0.321842	0.700451	0.497143	0.134444	0.0251255	0.133436	0.103422	0.887811	0.0552546	0.436655	0.0725636	0.275772	0.356928	0.939029
TCGA-MP-A4T8	161	1	0.591856	0.872753	0.568865	0.0278198	0.765605	0.872277	0.0418564	0.424194	0.269402	0.142868	0.802278	0.268389	0.811469	0.0826867	0.913658	0.045212	0.605879	0.120792	0.602867	0.67985	0.912744	0.58718	0.875206	0.254632	0.522877	0.0657369	0.0547884	0.825743	0.380587	0.218298	0.512756	0.777196	0.0898886	0.115992	0.683532	0.543311	0.0782122	0.0198037	0.106558	0.107759	0.884297	0.0373439	0.450351	0.0431862	0.543871	0.327871	0.945253
TCGA-86-7701	947	0	0.465726	0.667601	0.550345	0.0500102	0.431127	0.883263	0.0700545	0.521914	0.151237	0.250688	0.828342	0.318683	0.689918	0.108662	0.897419	0.071547	0.513961	0.0787447	0.634164	0.711407	0.878939	0.589556	0.829515	0.299109	0.813935	0.0301818	0.0728371	0.837988	0.198385	0.12726	0.450246	0.778836	0.115455	0.516949	0.804502	0.501257	0.190369	0.0215844	0.125541	0.0983174	0.864872	0.0514719	0.555857	0.0586396	0.37593	0.250177	0.90876
TCGA-MP-A5C7	2248	0	0.648941	0.826058	0.288762	0.0368974	0.631185	0.878684	0.0507698	0.0764086	0.123916	0.0900378	0.86099	0.425602	0.794577	0.0902347	0.539852	0.0440047	0.593378	0.0635925	0.333963	0.463245	0.891973	0.551602	0.865213	0.443924	0.28937	0.0492771	0.055936	0.857475	0.257148	0.0662642	0.46516	0.616916	0.0756236	0.0617877	0.729024	0.551214	0.0531102	0.0279744	0.231382	0.126511	0.925946	0.0362847	0.12494	0.049363	0.3729	0.121104	0.908733
TCGA-55-8206	888	0	0.706333	0.787576	0.603376	0.0216098	0.789548	0.832201	0.050136	0.602023	0.151738	0.11306	0.807978	0.288068	0.801993	0.0981529	0.954358	0.0539324	0.602223	0.0508888	0.701719	0.785972	0.883168	0.637173	0.858411	0.481512	0.562134	0.0404757	0.12442	0.8769	0.352545	0.0987069	0.636303	0.714483	0.0760044	0.141421	0.868327	0.552155	0.097841	0.00586694	0.190907	0.0804242	0.929516	0.0306415	0.363299	0.0515486	0.158279	0.260478	0.949164
TCGA-NJ-A4YP	50	0	0.661301	0.758898	0.638127	0.039537	0.821907	0.859203	0.067259	0.533102	0.500806	0.124321	0.718774	0.405342	0.703516	0.0838047	0.837365	0.106873	0.590242	0.155385	0.797777	0.726232	0.878881	0.583012	0.915022	0.371493	0.547514	0.0555643	0.0925611	0.864538	0.367895	0.207937	0.524823	0.777157	0.134857	0.138368	0.849841	0.647332	0.138003	0.0179277	0.317952	0.0886345	0.81378	0.0441475	0.325814	0.0460287	0.53805	0.543548	0.927736
TCGA-78-7535	949	1	0.856952	0.91009	0.388719	0.0449658	0.815919	0.92024	0.0658734	0.358532	0.204604	0.0845402	0.889827	0.417632	0.869322	0.123321	0.956882	0.0603697	0.430981	0.0786763	0.549001	0.494108	0.911496	0.628729	0.870144	0.264847	0.437994	0.0256936	0.208298	0.853545	0.193607	0.0828519	0.548487	0.871008	0.182063	0.118721	0.828014	0.686391	0.0739666	0.0214179	0.0759913	0.097665	0.942156	0.044522	0.283448	0.0773105	0.295723	0.282607	0.936616
TCGA-50-5055	1830	1	0.526994	0.709324	0.464631	0.027698	0.556751	0.899214	0.0515565	0.430887	0.367086	0.223256	0.778512	0.434911	0.67827	0.0949804	0.866286	0.11729	0.578789	0.128903	0.781124	0.752295	0.863962	0.670067	0.876768	0.273394	0.863121	0.0455313	0.0454209	0.839681	0.288634	0.150165	0.374683	0.732719	0.113482	0.246641	0.768432	0.431236	0.179542	0.0225402	0.130002	0.103559	0.869527	0.0376985	0.636207	0.0572693	0.27702	0.335128	0.89228
TCGA-78-7167	2681	1	0.769637	0.856568	0.340644	0.032845	0.782417	0.836893	0.0685631	0.209862	0.272549	0.102832	0.874163	0.251334	0.839086	0.115298	0.949648	0.0447886	0.578966	0.079077	0.494897	0.61083	0.895569	0.425609	0.887564	0.361705	0.222284	0.0388633	0.0572594	0.849352	0.247455	0.0721997	0.474664	0.61547	0.0662028	0.231713	0.821588	0.440175	0.0577732	0.0388325	0.226055	0.125412	0.923305	0.0392534	0.182224	0.0637009	0.148602	0.161353	0.939212
TCGA-99-8028	1118	0	0.44049	0.623765	0.432752	0.035542	0.592915	0.863319	0.0577658	0.452475	0.189651	0.261398	0.785943	0.436816	0.618113	0.0949694	0.922572	0.13576	0.553888	0.0774652	0.654356	0.740949	0.85772	0.660573	0.857498	0.251821	0.709207	0.0379602	0.153683	0.881892	0.345874	0.163625	0.391631	0.781808	0.0836315	0.18777	0.791633	0.448583	0.197742	0.0158225	0.12548	0.0912163	0.885511	0.0409965	0.523518	0.0615198	0.315164	0.336865	0.902561
TCGA-L9-A7SV	565	0	0.536287	0.467688	0.201845	0.0460651	0.718582	0.860178	0.0721543	0.0578223	0.306901	0.0961663	0.87934	0.276499	0.868243	0.111115	0.896708	0.0587084	0.652271	0.690111	0.507716	0.488448	0.87336	0.670118	0.876248	0.190065	0.861655	0.0686777	0.145579	0.807426	0.398827	0.0403054	0.502064	0.847506	0.0870115	0.13731	0.793314	0.592456	0.0618878	0.0399742	0.0915085	0.0963135	0.848877	0.0482141	0.121894	0.0640663	0.646027	0.111892	0.885908
TCGA-44-6148	704	0	0.749076	0.802019	0.356276	0.0455226	0.491147	0.7403	0.063182	0.493442	0.116244	0.168032	0.770156	0.379571	0.790872	0.107384	0.825002	0.0486959	0.57792	0.0859863	0.563614	0.70191	0.880559	0.45732	0.842081	0.438314	0.789616	0.0435286	0.0381242	0.812505	0.404578	0.135055	0.541854	0.51647	0.0796279	0.11985	0.786553	0.47538	0.112086	0.0209881	0.0988102	0.107724	0.925302	0.0433342	0.42123	0.0591645	0.152195	0.399696	0.934993
TCGA-97-8179	435	0	0.745954	0.454302	0.315068	0.0347506	0.714438	0.891185	0.0748787	0.342645	0.126369	0.083755	0.813053	0.226939	0.825379	0.121399	0.943424	0.062531	0.740829	0.0946528	0.525577	0.622115	0.891355	0.566331	0.856406	0.287609	0.403622	0.0373295	0.0663348	0.858667	0.361512	0.0704194	0.443561	0.549554	0.0846374	0.164089	0.788831	0.447506	0.11632	0.0206049	0.107681	0.111477	0.921676	0.0465785	0.286319	0.0654805	0.512847	0.206728	0.927143
TCGA-62-A46Y	414	1	0.647234	0.751131	0.524531	0.0562075	0.757185	0.830142	0.0739679	0.297545	0.214786	0.196034	0.825055	0.382542	0.76209	0.117613	0.897355	0.110533	0.67853	0.0796031	0.726154	0.812861	0.895371	0.678938	0.875688	0.240484	0.56231	0.0419943	0.154551	0.86268	0.587006	0.302078	0.331873	0.823088	0.22318	0.315533	0.814642	0.57948	0.184292	0.0395027	0.185649	0.145384	0.886493	0.0545191	0.449621	0.0906919	0.231028	0.517788	0.926221
TCGA-05-5425	882	0	0.658943	0.709604	0.42058	0.0353612	0.760275	0.856532	0.055149	0.25149	0.22496	0.172918	0.646523	0.318057	0.783671	0.0845684	0.918579	0.095099	0.973624	0.106541	0.783413	0.700204	0.910256	0.60533	0.882451	0.329125	0.861597	0.0393684	0.0835641	0.860071	0.458024	0.130439	0.489949	0.768676	0.0973274	0.198631	0.713135	0.466572	0.13818	0.0263008	0.0994414	0.100924	0.803243	0.0328969	0.773975	0.0571344	0.404635	0.259382	0.940303
TCGA-86-6851	179	0	0.578107	0.766029	0.396178	0.0431382	0.716242	0.878509	0.0681975	0.472922	0.457287	0.221199	0.864554	0.576847	0.706468	0.109651	0.92102	0.155245	0.524294	0.169874	0.765309	0.670663	0.902681	0.572983	0.849387	0.183536	0.57445	0.00829182	0.054768	0.854463	0.461028	0.141107	0.523943	0.814319	0.10558	0.276431	0.757131	0.534587	0.169238	0.0872729	0.220477	0.0993249	0.867121	0.058334	0.477214	0.0717057	0.470385	0.363859	0.807791
TCGA-93-A4JN	718	0	0.673703	0.749186	0.433029	0.0394617	0.675328	0.835713	0.047399	0.430855	0.13744	0.116704	0.735056	0.371142	0.678278	0.0795435	0.92956	0.0610137	0.59491	0.0712494	0.614466	0.658964	0.869968	0.515998	0.846087	0.230127	0.723895	0.0346803	0.118126	0.853579	0.353707	0.0842702	0.53851	0.399203	0.0724357	0.0990719	0.817007	0.484078	0.10154	0.0214477	0.233846	0.093665	0.907927	0.0372441	0.776103	0.0598986	0.239763	0.185097	0.903024
TCGA-44-4112	808	1	0.579325	0.673958	0.522461	0.0450845	0.708611	0.791887	0.0639946	0.540316	0.346426	0.185818	0.76255	0.418072	0.728759	0.117014	0.883925	0.136788	0.954627	0.116318	0.636149	0.810214	0.878719	0.481273	0.873196	0.16535	0.630308	0.0242384	0.13521	0.825431	0.502286	0.125726	0.422983	0.83391	0.171296	0.219938	0.751501	0.520182	0.146723	0.0441413	0.218241	0.115853	0.841193	0.0500771	0.493628	0.189863	0.349629	0.338532	0.927278
TCGA-05-4384	426	0	0.682365	0.806944	0.37462	0.0669899	0.668111	0.873732	0.0747586	0.29419	0.181254	0.131277	0.732948	0.364307	0.715892	0.103302	0.926834	0.0539018	0.657308	0.0858725	0.566247	0.787908	0.871405	0.609782	0.832442	0.226812	0.461443	0.0330054	0.0649369	0.867207	0.381679	0.116384	0.433173	0.801031	0.0750399	0.371104	0.861185	0.655047	0.153366	0.0277091	0.14095	0.112073	0.870431	0.0540513	0.32971	0.0485359	0.306457	0.41999	0.931401
TCGA-86-8280	701	0	0.661727	0.732091	0.380775	0.0420954	0.715473	0.905525	0.0605194	0.532678	0.440604	0.161338	0.823057	0.438218	0.823177	0.118197	0.85819	0.107717	0.66429	0.0860306	0.505359	0.615742	0.879743	0.639351	0.857025	0.254169	0.765006	0.0301863	0.0511417	0.85599	0.410138	0.134355	0.387499	0.542037	0.10605	0.210886	0.848892	0.547553	0.172731	0.0308012	0.110342	0.106645	0.879504	0.0506213	0.384713	0.0799876	0.237752	0.240112	0.914683
TCGA-86-8674	806	0	0.745282	0.796467	0.409182	0.0421361	0.72983	0.81849	0.0651409	0.552541	0.170237	0.15745	0.84753	0.39471	0.791198	0.113249	0.869565	0.0586991	0.618156	0.0776639	0.7157	0.57831	0.856702	0.404454	0.840982	0.38422	0.438436	0.030486	0.048837	0.811534	0.334189	0.117509	0.482587	0.771824	0.0860057	0.28104	0.829584	0.511307	0.109686	0.0285624	0.116912	0.0993628	0.911526	0.0375151	0.336675	0.075394	0.187691	0.199168	0.927932
TCGA-91-6840	372	0	0.633315	0.776827	0.466745	0.0376497	0.490575	0.858935	0.0536647	0.117567	0.175499	0.124991	0.758153	0.26972	0.834096	0.0958264	0.901694	0.0632923	0.60462	0.056833	0.477826	0.695705	0.884995	0.69159	0.858547	0.55952	0.854538	0.0177029	0.115832	0.834199	0.597394	0.0675246	0.380744	0.369913	0.067749	0.188136	0.749044	0.395926	0.152483	0.0269819	0.118008	0.104153	0.905478	0.0412547	0.210292	0.0584231	0.142801	0.152464	0.833261
TCGA-50-5066	1442	0	0.710712	0.689018	0.333598	0.0359866	0.689605	0.873999	0.0628158	0.285297	0.245542	0.142896	0.885446	0.4906	0.778964	0.10164	0.917109	0.0938302	0.754911	0.086042	0.761127	0.539719	0.846866	0.671964	0.868067	0.122629	0.790929	0.0394547	0.0592481	0.844969	0.295427	0.123697	0.514543	0.384211	0.0715625	0.141716	0.832041	0.489241	0.157005	0.0323195	0.0950097	0.0783495	0.87743	0.0369275	0.524072	0.0830092	0.2077	0.31441	0.918653
TCGA-MP-A4TC	74	1	0.721037	0.802821	0.423623	0.0357016	0.771395	0.882215	0.0687097	0.195425	0.316006	0.11443	0.815317	0.430879	0.785992	0.0854008	0.932229	0.0695583	0.971129	0.0896611	0.772867	0.642845	0.90598	0.618361	0.881307	0.0916426	0.884455	0.0272602	0.0771505	0.856529	0.359046	0.107526	0.401931	0.71655	0.114104	0.152564	0.816801	0.62291	0.119138	0.019911	0.0965548	0.0836732	0.857326	0.0372544	0.295655	0.0535893	0.274207	0.270874	0.92872
TCGA-55-A57B	546	0	0.687709	0.749165	0.421544	0.03778	0.735181	0.873055	0.0506309	0.468039	0.420423	0.284929	0.773294	0.467183	0.702056	0.0887495	0.935073	0.0616575	0.531257	0.100749	0.758884	0.805119	0.877759	0.608609	0.857358	0.248377	0.866038	0.0492245	0.0495306	0.825298	0.518969	0.152459	0.460621	0.729241	0.256381	0.0962329	0.622775	0.62525	0.086265	0.0720626	0.338599	0.123418	0.81804	0.0485229	0.418283	0.206954	0.312707	0.571958	0.927296
TCGA-62-A472	910	0	0.612936	0.795821	0.57994	0.0522828	0.799798	0.918382	0.0775602	0.625986	0.358154	0.222729	0.858756	0.426198	0.788487	0.104339	0.9063	0.134513	0.567335	0.143895	0.515877	0.62741	0.890516	0.744995	0.846044	0.279818	0.464135	0.0397473	0.275556	0.838946	0.575583	0.140798	0.48808	0.57982	0.457897	0.243713	0.852797	0.597194	0.187619	0.030774	0.284634	0.115123	0.900888	0.0559604	0.494348	0.119531	0.589304	0.381278	0.927312
TCGA-4B-A93V	300	1	0.564085	0.735235	0.215475	0.0245638	0.530698	0.876589	0.0570443	0.136531	0.225004	0.148981	0.797021	0.174095	0.791497	0.0920305	0.628356	0.0597548	0.557547	0.0605378	0.620466	0.352961	0.852718	0.304842	0.902476	0.0965719	0.657519	0.0276505	0.0349874	0.843351	0.143692	0.0877198	0.338121	0.885813	0.0759481	0.106734	0.760614	0.467934	0.0712546	0.0200505	0.0949042	0.0863756	0.897167	0.0342582	0.349588	0.0476567	0.419249	0.164291	0.933352
TCGA-05-4417	455	0	0.662502	0.777229	0.623359	0.032676	0.700341	0.86789	0.0689625	0.228853	0.284461	0.140439	0.661164	0.399265	0.759633	0.105619	0.927493	0.0913277	0.610365	0.174153	0.627928	0.653624	0.902181	0.477841	0.886302	0.290596	0.726489	0.0174078	0.0513837	0.873738	0.28159	0.14724	0.438699	0.612607	0.0928233	0.400358	0.524404	0.535764	0.12097	0.028682	0.129558	0.102285	0.924734	0.0351723	0.38514	0.0539708	0.440358	0.263256	0.85631
TCGA-62-8398	444	1	0.736731	0.857384	0.538886	0.0370635	0.76711	0.880584	0.0679979	0.435828	0.167121	0.0693356	0.494483	0.272138	0.854185	0.113022	0.900278	0.0595999	0.600606	0.0889578	0.742353	0.661516	0.896942	0.330188	0.851855	0.194894	0.836544	0.0804515	0.0434481	0.861532	0.304205	0.136006	0.508935	0.721853	0.0734653	0.154129	0.656923	0.642029	0.16594	0.0292727	0.106304	0.0960809	0.860584	0.0417357	0.816332	0.0610117	0.146854	0.205534	0.929536
TCGA-NJ-A4YQ	1432	0	0.509339	0.581529	0.409712	0.0733609	0.573062	0.886544	0.0845079	0.503915	0.310024	0.289609	0.809305	0.449531	0.62204	0.102483	0.780056	0.147746	0.588064	0.119368	0.79583	0.653526	0.851844	0.541486	0.826821	0.298453	0.867406	0.0353318	0.121956	0.842123	0.366738	0.117053	0.363381	0.803859	0.148527	0.326893	0.70966	0.42561	0.300701	0.0293872	0.124519	0.123554	0.726444	0.0589861	0.708645	0.072961	0.331799	0.41576	0.89565
TCGA-MP-A4T4	2617	1	0.420501	0.638727	0.445406	0.0567	0.648889	0.839641	0.0636507	0.401389	0.401884	0.27344	0.781086	0.431251	0.681077	0.0974125	0.857948	0.166033	0.569743	0.148179	0.68618	0.648719	0.863321	0.674509	0.881048	0.201527	0.591287	0.0265065	0.0698109	0.869614	0.334604	0.15741	0.360813	0.786172	0.12255	0.331852	0.747072	0.474724	0.210892	0.0260618	0.134528	0.130619	0.85198	0.0481372	0.533832	0.0617943	0.364097	0.360104	0.909597
TCGA-64-1681	1167	1	0.747028	0.716367	0.377068	0.0419484	0.842518	0.910681	0.0748806	0.34794	0.321504	0.138847	0.851702	0.407761	0.87093	0.124132	0.919726	0.0911653	1.01057	0.0987227	0.683372	0.744345	0.91818	0.633669	0.888397	0.322536	0.877385	0.00858711	0.055454	0.895241	0.402829	0.139508	0.601727	0.58859	0.0950569	0.220396	0.830463	0.677648	0.208095	0.0148474	0.118699	0.1208	0.91429	0.0501354	0.446215	0.0663681	0.207113	0.305536	0.957906
TCGA-78-7148	626	1	0.753988	0.799777	0.410108	0.0381333	0.7895	0.801829	0.0621724	0.223148	0.0952432	0.0619922	0.588261	0.375145	0.768802	0.0894607	0.91173	0.0627576	0.602645	0.0940752	0.600943	0.544788	0.927188	0.408708	0.9301	0.317163	0.7449	0.0751671	0.0507924	0.732403	0.340824	0.109679	0.484726	0.762525	0.0788666	0.224918	0.783738	0.406968	0.126725	0.0296089	0.12203	0.100581	0.817234	0.0388678	0.658736	0.0684515	0.328409	0.175172	0.945863
TCGA-MP-A4SY	1501	1	0.720992	0.796935	0.665447	0.0394154	0.767929	0.860952	0.057884	0.44514	0.259286	0.129492	0.739664	0.584004	0.758871	0.103089	0.91143	0.0589402	0.622911	0.0773402	0.721629	0.725475	0.897018	0.43416	0.892557	0.283209	0.683632	0.0851233	0.428181	0.843205	0.55031	0.0998399	0.629247	0.744529	0.0909145	0.158427	0.792087	0.634307	0.115434	0.0296695	0.278716	0.109052	0.863396	0.0567157	0.415902	0.0666999	0.208538	0.331745	0.919684
TCGA-78-7153	3635	0	0.788987	0.828805	0.712962	0.0426155	0.843406	0.932801	0.0503116	0.662685	0.149887	0.113145	0.853636	0.687876	0.730055	0.104827	0.927735	0.0648448	0.535767	0.0708777	0.450809	0.797314	0.873254	0.687992	0.885733	0.650079	0.636464	0.0346284	0.163301	0.856415	0.169176	0.153439	0.549936	0.880707	0.110039	0.480394	0.890649	0.683627	0.117168	0.0284374	0.318616	0.112274	0.918646	0.0297682	0.308141	0.0565432	0.693847	0.181764	0.93352
TCGA-55-6968	1293	1	0.497176	0.800002	0.547103	0.0591685	0.551631	0.838909	0.0865449	0.403271	0.254915	0.163849	0.843851	0.373487	0.726346	0.102512	0.741134	0.0856299	0.969516	0.18144	0.596209	0.416568	0.892619	0.521383	0.853127	0.138049	0.876465	0.0370179	0.0596039	0.876171	0.304526	0.165261	0.509181	0.731754	0.114525	0.4749	0.745336	0.559903	0.146849	0.0306977	0.263319	0.128748	0.863582	0.0610607	0.681927	0.072051	0.201724	0.294097	0.497633
TCGA-86-8073	740	0	0.578235	0.775958	0.455058	0.0265894	0.61329	0.905637	0.0609307	0.211015	0.147266	0.14161	0.780688	0.287473	0.556917	0.0989263	0.929316	0.0589733	0.542697	0.0751155	0.695024	0.562043	0.876962	0.586724	0.84257	0.188786	0.538804	0.0235962	0.167409	0.875833	0.382342	0.131965	0.328347	0.693987	0.0855841	0.127742	0.364908	0.456786	0.0827401	0.0149703	0.0867466	0.102232	0.889537	0.0359137	0.38486	0.0658518	0.414693	0.253154	0.924667
TCGA-97-8171	568	0	0.842452	0.880796	0.851432	0.0421391	0.269444	0.912352	0.0609484	0.0328559	0.145853	0.0845151	0.888869	0.619791	0.798073	0.126985	0.71968	0.0568816	0.583812	0.0490319	0.451761	0.748134	0.902906	0.604308	0.836259	0.75843	0.76625	0.0455243	0.0410301	0.900886	0.256413	0.0761183	0.717189	0.3584	0.0939727	0.0694635	0.877516	0.616143	0.120803	0.0240634	0.0898523	0.113183	0.905881	0.0580798	0.0970335	0.0762623	0.0900601	0.0822074	0.933301
TCGA-38-7271	800	1	0.529287	0.657408	0.484986	0.0383177	0.560469	0.902197	0.0628777	0.48252	0.305098	0.206001	0.857038	0.422846	0.710541	0.100559	0.898854	0.100281	0.552276	0.139272	0.79057	0.748581	0.887855	0.708804	0.872472	0.336678	0.766706	0.163979	0.169964	0.858579	0.374149	0.170431	0.332008	0.8363	0.102732	0.29933	0.786187	0.430452	0.22419	0.0239033	0.21968	0.0875485	0.87074	0.0398597	0.580406	0.0658058	0.359094	0.370631	0.950737
TCGA-78-7160	697	1	0.599797	0.669351	0.403724	0.0360544	0.687791	0.884899	0.0503967	0.457704	0.333617	0.184282	0.700539	0.395271	0.735085	0.0995085	0.884754	0.122509	0.532581	0.112111	0.739811	0.794066	0.894164	0.67055	0.87163	0.341145	0.754493	0.0174306	0.0390067	0.859192	0.405854	0.220555	0.397611	0.779067	0.108206	0.246385	0.847555	0.538138	0.188905	0.0313523	0.145313	0.0944513	0.916088	0.0436842	0.69142	0.0591711	0.309074	0.42719	0.983108
TCGA-44-8120	260	0	0.696792	0.552581	0.326668	0.036646	0.643584	0.865573	0.0491243	0.509647	0.280227	0.183405	0.832639	0.27567	0.78115	0.1186	0.912491	0.0755736	0.542153	0.0825537	0.644983	0.565187	0.828444	0.56471	0.842401	0.168722	0.82807	0.00165144	0.0345913	0.852669	0.31897	0.134494	0.45117	0.728611	0.0778857	0.113126	0.728697	0.531333	0.230374	0.0114734	0.0910711	0.0874571	0.825026	0.0313546	0.399906	0.077581	0.315121	0.27337	0.915296
TCGA-50-8459	1119	0	0.58851	0.6714	0.401861	0.0345073	0.681997	0.865879	0.0456316	0.394943	0.207606	0.170357	0.633472	0.401289	0.771303	0.101474	0.921698	0.0693026	0.580522	0.0744054	0.82465	0.707381	0.891082	0.525072	0.86595	0.224206	0.811485	0.0319178	0.0354274	0.816746	0.337349	0.131603	0.423403	0.763122	0.258613	0.0905302	0.798928	0.515146	0.100202	0.0198518	0.115997	0.0836479	0.875327	0.0528691	0.70133	0.0641883	0.239674	0.301732	0.919399
TCGA-44-2665	1301	0	0.709677	0.761076	0.506193	0.0429074	0.825457	0.824561	0.0699149	0.225316	0.189475	0.0891053	0.662478	0.342534	0.791983	0.0917668	0.662816	0.0554171	0.559318	0.104215	0.833135	0.78621	0.857564	0.645342	0.846784	0.115321	0.585236	0.0542459	0.0508209	0.815463	0.402487	0.0999178	0.627062	0.595924	0.101059	0.210236	0.823213	0.689996	0.117922	0.0301843	0.106507	0.136961	0.880155	0.0414883	0.274089	0.0717055	0.352195	0.437636	0.901054
TCGA-95-A4VP	605	0	0.564558	0.774695	0.567374	0.0334692	0.573755	0.873294	0.0659524	0.500166	0.32006	0.175281	0.743894	0.360744	0.701686	0.0995757	0.901249	0.0692928	0.61243	0.0942646	0.604229	0.661086	0.895365	0.514643	0.840219	0.452293	0.710657	0.0546185	0.0415481	0.819167	0.295738	0.139315	0.445556	0.744522	0.103914	0.150338	0.769538	0.517803	0.140815	0.0373584	0.113088	0.130645	0.892302	0.0427438	0.397745	0.0531097	0.217072	0.38345	0.898892
TCGA-78-8662	3361	1	0.773478	0.501977	0.449317	0.0400356	0.723263	0.903397	0.0570963	0.282338	0.237868	0.0698428	0.888245	0.313246	0.865374	0.121939	0.921776	0.0724258	0.882099	0.0636923	0.631867	0.719937	0.902606	0.341266	0.869226	0.223889	0.88096	0.00852108	0.0942214	0.8304	0.664709	0.180561	0.557883	0.494687	0.0786388	0.0749635	0.622203	0.722039	0.0839428	0.0264119	0.235637	0.129293	0.913255	0.046063	0.314324	0.07494	0.744377	0.0974454	0.947278
TCGA-95-7567	568	0	0.606486	0.782686	0.575801	0.0317847	0.737371	0.907387	0.0631809	0.594521	0.37104	0.130949	0.835729	0.250746	0.758511	0.116788	0.935311	0.0888283	0.632398	0.0974858	0.80067	0.737041	0.889301	0.643483	0.869418	0.312304	0.808281	0.0304332	0.359154	0.90055	0.487546	0.175464	0.505755	0.824094	0.41001	0.161287	0.851121	0.608672	0.147595	0.497342	0.285048	0.114378	0.919435	0.0392263	0.322632	0.0586824	0.568767	0.241183	0.938924
TCGA-95-A4VN	553	0	0.454447	0.747791	0.512088	0.0404214	0.68668	0.885249	0.0873794	0.352505	0.301567	0.379762	0.686714	0.442074	0.759063	0.10669	0.898977	0.102656	0.611536	0.105579	0.699589	0.818565	0.899537	0.685474	0.8447	0.258403	0.592889	0.0640619	0.0684558	0.843615	0.502213	0.211633	0.420205	0.861661	0.254307	0.179253	0.7482	0.520412	0.285092	0.0419761	0.324581	0.115757	0.882162	0.051449	0.471326	0.0559935	0.392314	0.36227	0.904802
TCGA-05-4425	669	0	0.708211	0.792068	0.642222	0.0365151	0.765281	0.904038	0.591	0.558939	0.162133	0.175673	0.720929	0.408102	0.820702	0.113855	0.539827	0.0859164	0.580523	0.103897	0.554333	0.592771	0.882043	0.360136	0.900326	0.560671	0.883748	0.0390725	0.248903	0.892002	0.406523	0.0747499	0.482491	0.3903	0.251333	0.370215	0.644376	0.403418	0.136738	0.0709114	0.107276	0.130096	0.90832	0.0560258	0.271601	0.0689981	0.582214	0.327149	0.92228
TCGA-38-4632	1357	1	0.707457	0.777866	0.555383	0.0542371	0.841357	0.909458	0.0745154	0.607708	0.261495	0.24422	0.835495	0.512138	0.846342	0.108888	0.929531	0.0857707	0.647385	0.0914221	0.67261	0.741759	0.907021	0.407791	0.895472	0.292884	0.606475	0.0421477	0.265594	0.870136	0.275767	0.172127	0.524863	0.74902	0.106045	0.188115	0.758682	0.646355	0.176532	0.0344787	0.107205	0.102423	0.875303	0.0457547	0.367518	0.0762109	0.572874	0.355987	0.896816
TCGA-50-6594	370	1	0.740241	0.814974	0.763396	0.0438335	0.873651	0.893168	0.0456166	0.567585	0.26278	0.210606	0.82537	0.747738	0.841083	0.128532	0.913595	0.0635601	0.615153	0.087946	0.690602	0.887894	0.918389	0.493448	0.855478	0.133469	0.534682	0.0327338	0.121592	0.86973	0.404952	0.125249	0.450101	0.859985	0.0790578	0.130175	0.688592	0.382035	0.0684187	0.0206322	0.413794	0.137962	0.907828	0.0486959	0.201208	0.0669169	0.333538	0.190133	0.939482
TCGA-67-6216	141	0	0.748605	0.776777	0.610549	0.0473482	0.764122	0.913351	0.0641477	0.654045	0.252194	0.203828	0.86557	0.444481	0.662735	0.113922	0.894893	0.0929227	0.588074	0.136795	0.565359	0.746041	0.897985	0.643664	0.884378	0.426235	0.5171	0.0293036	0.221014	0.860064	0.527311	0.174376	0.617238	0.860058	0.253449	0.339866	0.828989	0.579386	0.144537	0.0290908	0.33487	0.11884	0.931127	0.0469258	0.397111	0.0757875	0.37152	0.376195	0.926723
TCGA-86-8056	139	0	0.641335	0.7801	0.590955	0.0330926	0.76429	0.877646	0.0521542	0.581944	0.172451	0.129544	0.439168	0.278564	0.764268	0.115132	0.901423	0.0610239	0.52809	0.0659216	0.752702	0.806969	0.868732	0.375967	0.860567	0.35607	0.446145	0.00882858	0.0276997	0.905161	0.366594	0.0712943	0.50853	0.756142	0.0800216	0.133583	0.836865	0.537104	0.161086	0.0241233	0.0908222	0.114372	0.954697	0.0398856	0.35084	0.0606703	0.187973	0.253202	0.948979
TCGA-44-6144	723	0	0.69044	0.833831	0.405022	0.0432498	0.558271	0.841031	0.0700275	0.347048	0.361026	0.15128	0.719835	0.336451	0.789148	0.0981936	0.823959	0.0507941	0.581704	0.0786084	0.597035	0.574074	0.872643	0.51649	0.844565	0.304454	0.671516	0.0243888	0.0341916	0.851334	0.330929	0.118714	0.542397	0.583235	0.0701331	0.171806	0.667376	0.603949	0.0967209	0.0268068	0.0939912	0.102372	0.887464	0.0452265	0.247412	0.0623488	0.242963	0.259659	0.93611
TCGA-99-AA5R	658	0	0.538246	0.781128	0.405836	0.0272431	0.492994	0.859607	0.0535145	0.333465	0.0995497	0.210506	0.703916	0.453055	0.693929	0.078547	0.93733	0.0733605	0.532642	0.131991	0.698912	0.788929	0.909214	0.572555	0.88011	0.287839	0.742114	0.0318074	0.072328	0.845638	0.416524	0.13989	0.374582	0.689718	0.105903	0.18966	0.810642	0.512015	0.0829409	0.0176945	0.0953933	0.153333	0.884818	0.0370404	0.616399	0.0484258	0.439777	0.390126	0.950853
TCGA-97-A4M0	652	0	0.731371	0.799508	0.631624	0.0401295	0.875045	0.911621	0.0571151	0.439398	0.447099	0.152181	0.8824	0.437344	0.829888	0.0899751	0.925293	0.116013	0.621626	0.116016	0.756634	0.85854	0.90684	0.779963	0.879376	0.583505	0.511323	0.0400589	0.1251	0.866322	0.515793	0.141351	0.641414	0.839719	0.265097	0.701604	0.871577	0.634903	0.154919	0.0814086	0.242974	0.120502	0.915922	0.0387624	0.355301	0.0658589	0.67544	0.522313	0.924111
TCGA-86-7955	1072	0	0.795561	0.562034	0.336954	0.0439891	0.811907	0.870889	0.0633547	0.576371	0.136341	0.0964114	0.860949	0.129839	0.834997	0.112099	0.881314	0.0469781	0.529888	0.0679526	0.841393	0.397323	0.868275	0.590018	0.853794	0.1745	0.925495	0.0429488	0.0452827	0.834307	0.545821	0.0926445	0.60814	0.679957	0.0954935	0.343115	0.811714	0.753895	0.0745014	0.0157354	0.101067	0.080717	0.903951	0.0451354	0.776313	0.0599267	0.181978	0.225098	0.915315
TCGA-50-5936	257	1	0.700585	0.817646	0.51008	0.0236561	0.745592	0.864767	0.060414	0.543009	0.298395	0.112337	0.767317	0.40265	0.795029	0.0575044	0.903669	0.0730987	0.456766	0.101257	0.781302	0.779474	0.8937	0.379068	0.861225	0.182116	0.779426	0.191054	0.0919087	0.777022	0.653964	0.217287	0.471769	0.783295	0.0604123	0.176285	0.785676	0.618546	0.121488	0.0224919	0.22381	0.075984	0.764712	0.0313811	0.763585	0.0525803	0.171645	0.358639	0.917385
TCGA-86-8054	1148	0	0.737508	0.860318	0.691597	0.0269526	0.322624	0.92891	0.0565837	0.699341	0.565995	0.0809708	0.9013	0.130189	0.837024	0.107747	0.916693	0.0493165	0.990519	0.0496219	0.217068	0.664747	0.886337	0.386065	0.84612	0.50523	0.744538	0.0381437	0.64756	0.888883	0.29946	0.256257	0.543842	0.870466	0.0655894	0.193204	0.822135	0.729794	0.0704117	0.0223533	0.159846	0.098271	0.937867	0.0290273	0.148213	0.0677449	0.263651	0.363495	0.930046
TCGA-L9-A743	664	0	0.50988	0.650519	0.420921	0.025218	0.577814	0.863653	0.0593542	0.403738	0.208701	0.1568	0.697566	0.424646	0.669955	0.082273	0.925452	0.0836005	0.502225	0.0768484	0.693587	0.723115	0.896303	0.636997	0.871929	0.253094	0.767543	0.0249804	0.0681834	0.859358	0.2987	0.159838	0.350088	0.740321	0.0918275	0.155491	0.757236	0.460208	0.142963	0.0211762	0.0830308	0.079515	0.882798	0.0443481	0.450021	0.0428426	0.34682	0.321918	0.930913
TCGA-86-A4P7	415	0	0.598704	0.762474	0.467886	0.0259857	0.636167	0.853142	0.0505642	0.349572	0.196784	0.2319	0.81156	0.40341	0.682152	0.0835756	0.893578	0.0855471	0.578251	0.0772366	0.700962	0.705022	0.897145	0.612274	0.871547	0.327828	0.83071	0.0489435	0.0851783	0.87584	0.378219	0.137202	0.381437	0.739989	0.0968615	0.158959	0.789967	0.518514	0.170427	0.0209841	0.112817	0.123181	0.897327	0.0363819	0.537975	0.0552052	0.313027	0.375603	0.921341
TCGA-44-6146	728	0	0.776667	0.668418	0.389437	0.0431065	0.619378	0.632998	0.0580591	0.695682	0.0842579	0.0997529	0.308748	0.254602	0.823065	0.111289	0.929409	0.0467906	0.547158	0.0698908	0.796402	0.868468	0.889925	0.502538	0.859583	0.196111	0.410495	0.0314187	0.0592319	0.860353	0.419365	0.0945461	0.305516	0.824714	0.162246	0.156365	0.858248	0.441874	0.0631081	0.0194627	0.0801655	0.128427	0.912535	0.0438389	0.406748	0.0734325	0.159654	0.213777	0.91756
TCGA-05-4396	303	1	0.79135	0.7892	0.763091	0.0336312	0.850371	0.780471	0.0707809	0.773937	0.188429	0.10961	0.603749	0.615619	0.870309	0.10671	0.759377	0.0438341	0.619445	0.0735396	0.75661	0.354232	0.917791	0.223875	0.872925	0.469706	0.559442	0.0367801	0.0660381	0.834897	0.423751	0.148897	0.619975	0.838445	0.0946339	0.467838	0.551017	0.710372	0.0843769	0.0234772	0.105221	0.0925199	0.910735	0.0554827	0.663108	0.0591295	0.603434	0.212625	0.924715
TCGA-55-8208	674	0	0.547344	0.68444	0.412014	0.036889	0.640441	0.883798	0.0444281	0.317426	0.260717	0.173771	0.655367	0.462953	0.669164	0.0881954	0.900564	0.0867376	0.528498	0.106205	0.776298	0.763217	0.888441	0.627126	0.847498	0.188863	0.857334	0.0109337	0.0344559	0.837317	0.338298	0.162202	0.423714	0.691765	0.107154	0.192181	0.716103	0.430188	0.152727	0.010885	0.094959	0.104606	0.880956	0.052947	0.557602	0.0437873	0.252723	0.339475	0.902084
TCGA-44-2656	1429	0	0.578319	0.708782	0.489661	0.0360164	0.707534	0.846938	0.112027	0.526899	0.35036	0.422407	0.794965	0.456487	0.665401	0.129776	0.792983	0.15592	0.566931	0.145383	0.751526	0.833556	0.896402	0.63335	0.918381	0.212493	0.816084	0.105592	0.146692	0.794302	0.456841	0.18167	0.374796	0.797753	0.250559	0.25717	0.816622	0.55823	0.182837	0.0638419	0.181933	0.119757	0.89232	0.0444112	0.489656	0.0881958	0.283569	0.42241	0.915487
TCGA-MP-A4SW	1778	1	0.55749	0.689853	0.373423	0.0336355	0.596501	0.848314	0.0476354	0.38145	0.304682	0.201322	0.779562	0.381922	0.698388	0.0855987	0.926161	0.0570614	0.575466	0.0544288	0.560438	0.649453	0.877965	0.661315	0.862178	0.25229	0.881387	0.0329572	0.0515642	0.827684	0.301133	0.103635	0.457332	0.786619	0.0849305	0.182079	0.812264	0.502145	0.15633	0.0158533	0.0857278	0.0928528	0.916876	0.0273114	0.472071	0.0627023	0.338856	0.263464	0.947
TCGA-73-7499	1531	1	0.595108	0.809868	0.576718	0.0494154	0.613709	0.887372	0.0650906	0.601091	0.427298	0.19873	0.841385	0.444628	0.722575	0.104917	0.872987	0.0966461	0.582022	0.0905256	0.760285	0.704277	0.89527	0.701961	0.87566	0.266562	0.819592	0.0388789	0.499457	0.829798	0.436295	0.226304	0.544191	0.815019	0.110859	0.198631	0.822879	0.547573	0.219053	0.0108608	0.13742	0.100351	0.892056	0.0431776	0.45182	0.0508435	0.306372	0.306575	0.943406
TCGA-44-7661	557	1	0.64215	0.693443	0.548478	0.0434838	0.765976	0.879772	0.0519538	0.363437	0.345189	0.154808	0.640556	0.600705	0.779221	0.103407	0.924508	0.0716335	0.589807	0.15813	0.684	0.855301	0.911851	0.650028	0.886993	0.197453	0.733633	0.0306122	0.0422575	0.852991	0.373255	0.259637	0.383971	0.821851	0.112215	0.213324	0.626309	0.590114	0.105482	0.0130272	0.104342	0.112845	0.736681	0.0337609	0.435404	0.0647336	0.334482	0.423307	0.923181
TCGA-86-8358	653	0	0.689998	0.900947	0.766989	0.0126323	0.655728	0.866903	0.0666832	0.591136	0.324861	0.105604	0.735787	0.381384	0.897709	0.119398	0.932984	0.0626226	0.446211	0.510206	0.711959	0.871856	0.893331	0.575627	0.851977	0.507577	0.911677	0.054801	0.10115	0.81583	0.544631	0.270733	0.543426	0.713504	0.0576031	0.323784	0.764701	0.735958	0.0866849	0.023295	0.172799	0.0971923	0.923279	0.0323707	0.662478	0.0703837	0.137402	0.136144	0.79715
TCGA-44-2668	761	1	0.561043	0.621893	0.448026	0.0445517	0.774475	0.852996	0.0887263	0.412462	0.371594	0.117095	0.744745	0.546424	0.716814	0.138437	0.874317	0.117753	0.988984	0.0967015	0.785176	0.896677	0.911071	0.634009	0.859413	0.135854	0.856097	0.0558226	0.0960235	0.785846	0.269571	0.152317	0.391037	0.809596	0.119564	0.192155	0.794268	0.426931	0.164608	0.042661	0.238317	0.0889609	0.9097	0.0522163	0.398966	0.151853	0.360934	0.361715	0.925636
TCGA-69-A59K	591	0	0.603217	0.853595	0.561565	0.0428809	0.62977	0.880727	0.0742431	0.368329	0.519366	0.411053	0.779781	0.311615	0.702859	0.0933822	0.888165	0.061901	0.597199	0.109781	0.835576	0.650387	0.887899	0.830937	0.873832	0.389643	0.850919	0.0770989	0.0548325	0.864112	0.403188	0.316167	0.618824	0.796916	0.0853205	0.429088	0.763986	0.592383	0.21483	0.0308831	0.103303	0.114529	0.908395	0.0414002	0.453396	0.0630634	0.245152	0.305047	0.907812
TCGA-44-3917	1183	0	0.560743	0.678861	0.399056	0.0396415	0.400628	0.848697	0.0679631	0.41936	0.259091	0.179798	0.870335	0.349007	0.671898	0.0873417	0.849272	0.105473	0.5876	0.300097	0.54364	0.554781	0.848539	0.531099	0.785638	0.360678	0.510558	0.0334575	0.0580738	0.83059	0.309073	0.150936	0.388824	0.828129	0.110569	0.446163	0.775611	0.499684	0.137955	0.0301173	0.117816	0.123863	0.636217	0.025415	0.461807	0.0566819	0.448804	0.282766	0.741062
TCGA-55-8205	599	0	0.550988	0.68854	0.502641	0.0436133	0.718408	0.910933	0.0709959	0.234862	0.155242	0.219134	0.55904	0.439053	0.656866	0.111845	0.853196	0.114466	0.607854	0.110216	0.849453	0.695355	0.875333	0.711561	0.855822	0.151859	0.846498	0.0390657	0.0572878	0.875396	0.251435	0.235193	0.256228	0.735263	0.301602	0.201711	0.594298	0.514688	0.212543	0.0265938	0.11151	0.115115	0.631517	0.0485506	0.473256	0.0653097	0.472759	0.308466	0.93952
TCGA-78-7536	244	1	0.700795	0.904622	0.485872	0.0396064	0.670733	0.910417	0.058155	0.490966	0.24819	0.110819	0.893397	0.276106	0.894361	0.119403	0.926208	0.0500243	0.889864	0.0668312	0.767816	0.459241	0.902972	0.321371	0.872242	0.336099	0.746132	0.0357535	0.0449328	0.8151	0.546535	0.0892421	0.69456	0.747185	0.0650924	0.120518	0.717953	0.634528	0.0837129	0.0193866	0.114831	0.104112	0.418383	0.0309632	0.555515	0.0616144	0.452313	0.401757	0.931102
TCGA-50-5049	3094	0	0.501741	0.633026	0.449811	0.0259083	0.551763	0.851265	0.056338	0.406612	0.211158	0.265551	0.732561	0.473884	0.650729	0.0880829	0.884047	0.10775	0.681124	0.101321	0.746766	0.677763	0.903782	0.620935	0.894363	0.231829	0.886048	0.0704388	0.0580386	0.857702	0.313673	0.149876	0.358286	0.596638	0.140665	0.233592	0.72479	0.460563	0.238045	0.0222627	0.12146	0.0859434	0.86126	0.036922	0.73668	0.0598598	0.263054	0.343913	0.920898
TCGA-50-7109	308	1	0.60112	0.756179	0.422335	0.0346624	0.71032	0.868558	0.0420882	0.408596	0.234259	0.118734	0.660114	0.312045	0.834566	0.113833	0.744782	0.0727424	0.575701	0.195817	0.621723	0.511945	0.905979	0.576871	0.845843	0.542096	0.778366	0.0120641	0.0755736	0.850258	0.320541	0.110569	0.398089	0.838053	0.0914851	0.124894	0.638608	0.583395	0.123996	0.0235959	0.155777	0.0979989	0.904349	0.0498105	0.319315	0.089773	0.26013	0.27154	0.923412
TCGA-86-8278	944	0	0.688232	0.764513	0.589293	0.0373886	0.748362	0.80302	0.0708601	0.586586	0.13069	0.219349	0.83876	0.331863	0.634959	0.108178	0.951987	0.0760365	0.951757	0.111574	0.689651	0.643347	0.867043	0.608977	0.872003	0.279398	0.489112	0.0188647	0.0831348	0.852513	0.333293	0.133928	0.588969	0.82144	0.121087	0.222897	0.834999	0.598552	0.136275	0.0645702	0.282051	0.136805	0.896126	0.0577474	0.333781	0.0620701	0.277705	0.362203	0.919066
TCGA-MP-A4T2	1136	1	0.698963	0.807188	0.580284	0.0316267	0.589268	0.861885	0.0528494	0.660216	0.257696	0.118715	0.850204	0.408898	0.745755	0.0857889	0.911205	0.0737171	0.595858	0.161331	0.705316	0.69319	0.909219	0.738948	0.882963	0.515822	0.376835	0.0218335	0.0492068	0.860897	0.562773	0.106336	0.631001	0.875388	0.23753	0.118305	0.869499	0.627432	0.105866	0.0175585	0.124389	0.0828569	0.906696	0.0720381	0.38172	0.0595122	0.187771	0.651637	0.930589
TCGA-53-7626	929	1	0.670822	0.751835	0.424003	0.0319008	0.698629	0.902896	0.0561077	0.46528	0.168958	0.349574	0.772051	0.399664	0.713276	0.103478	0.891087	0.088395	0.6123	0.085976	0.705835	0.705941	0.914561	0.621043	0.883069	0.400999	0.59443	0.0218355	0.105959	0.871383	0.360078	0.120512	0.435173	0.722066	0.0874802	0.285877	0.825489	0.547975	0.174807	0.0183614	0.116609	0.126087	0.901362	0.0377673	0.537062	0.0867035	0.348116	0.418382	0.926779
TCGA-49-4487	855	1	0.546108	0.710865	0.487309	0.0501581	0.608766	0.86625	0.0654306	0.523738	0.320091	0.297288	0.818051	0.485114	0.6111	0.104303	0.847065	0.137827	0.608439	0.147234	0.697069	0.66748	0.868674	0.559252	0.866705	0.261741	0.87097	0.0475186	0.0690914	0.856047	0.440865	0.184857	0.421508	0.777368	0.140668	0.216267	0.799253	0.487934	0.223647	0.0247904	0.1507	0.128271	0.902201	0.0549981	0.438129	0.0755697	0.34263	0.326697	0.922754
TCGA-53-7624	1043	1	0.717897	0.793246	0.770851	0.0323071	0.835857	0.890578	0.0714248	0.743574	0.597383	0.108204	0.897528	0.55678	0.871542	0.117787	0.920138	0.079577	0.849711	0.0715167	0.842368	0.624721	0.917127	0.419069	0.874157	0.248037	0.870258	0.0314649	0.189384	0.825947	0.669521	0.362733	0.664642	0.854259	0.0973755	0.169061	0.659331	0.72652	0.142936	0.0259254	0.232776	0.111577	0.784919	0.0431024	0.861265	0.061139	0.147776	0.237904	0.918041
TCGA-64-5779	864	0	0.485335	0.778316	0.515334	0.035156	0.339287	0.894006	0.0486064	0.295882	0.207391	0.174924	0.774407	0.201497	0.516862	0.0887151	0.885415	0.0662332	0.662421	0.0994819	0.44179	0.446143	0.909881	0.538085	0.862402	0.342452	0.764761	0.0669661	0.0653102	0.85906	0.283146	0.0948748	0.369988	0.405145	0.0816523	0.145037	0.558789	0.520826	0.149831	0.0246033	0.0971146	0.0893975	0.853836	0.031699	0.416332	0.0531702	0.377875	0.20042	0.572191
TCGA-78-7145	826	1	0.801596	0.852726	0.481483	0.0450156	0.898867	0.906663	0.0556212	0.467023	0.340589	0.0961474	0.837267	0.266298	0.837699	0.0893472	0.852014	0.0647091	0.515377	0.0915678	0.449645	0.694534	0.916454	0.719591	0.885006	0.363429	0.517597	0.0707165	0.0667661	0.837583	0.417456	0.176687	0.75382	0.867275	0.0667184	0.296903	0.895968	0.707041	0.192729	0.0218182	0.309281	0.131356	0.9132	0.0427202	0.175424	0.0708108	0.16902	0.208555	0.940507
TCGA-49-4490	385	1	0.676241	0.745769	0.596741	0.044801	0.760812	0.854866	0.075023	0.538594	0.242324	0.175637	0.819803	0.486102	0.803185	0.11113	0.801597	0.0965587	0.553018	0.0974905	0.758366	0.70966	0.883351	0.611579	0.85837	0.283116	0.660773	0.027931	0.0793831	0.822702	0.488451	0.156231	0.563094	0.63111	0.111984	0.180588	0.809366	0.593367	0.178966	0.0214082	0.282176	0.127756	0.8603	0.033978	0.422529	0.0817362	0.196337	0.333211	0.940839
TCGA-44-A47F	337	0	0.775147	0.806365	0.682988	0.0506214	0.868682	0.866463	0.0651401	0.59362	0.241382	0.066385	0.677504	0.719821	0.838988	0.116201	0.908667	0.0612849	0.630413	0.0677616	0.775129	0.875098	0.898547	0.65083	0.880088	0.424516	0.433375	0.0359127	0.223634	0.868496	0.354275	0.116267	0.587665	0.830063	0.071565	0.621443	0.87432	0.654796	0.0779202	0.0322443	0.220225	0.116665	0.904482	0.0624339	0.506641	0.070933	0.481194	0.270811	0.914433
TCGA-L4-A4E6	435	0	0.642024	0.690172	0.408523	0.0491645	0.608132	0.848509	0.0670954	0.308067	0.189041	0.161176	0.675466	0.50238	0.667982	0.113416	0.903324	0.0940131	0.576415	0.101894	0.682243	0.825129	0.872245	0.569684	0.84525	0.270933	0.768576	0.0467132	0.0577975	0.841201	0.456912	0.130323	0.421381	0.63915	0.104086	0.203185	0.738301	0.539201	0.148456	0.0312675	0.0997793	0.135503	0.88361	0.0536875	0.515768	0.0722981	0.28594	0.435219	0.903317
TCGA-50-5932	1235	1	0.766835	0.831048	0.360205	0.035839	0.800836	0.635187	0.0753091	0.340223	0.289304	0.0739723	0.835452	0.411733	0.890287	0.118571	0.899662	0.0616065	0.6027	0.0703589	0.726169	0.472866	0.8719	0.406196	0.890154	0.425981	0.420476	0.0448506	0.0702249	0.805853	0.319571	0.0749533	0.482057	0.606016	0.0826845	0.132361	0.751469	0.759345	0.122221	0.032837	0.0937704	0.113387	0.926393	0.0426181	0.303986	0.0638772	0.14082	0.123845	0.919608
TCGA-MP-A4TJ	339	1	0.553014	0.669307	0.485635	0.0573892	0.658254	0.856259	0.073577	0.532809	0.199984	0.181315	0.763451	0.487435	0.745315	0.0905885	0.835022	0.14723	0.605277	0.0787682	0.715062	0.647199	0.883322	0.620402	0.886459	0.358769	0.823661	0.0458899	0.0873587	0.808868	0.331487	0.108489	0.40063	0.638336	0.114413	0.329569	0.702017	0.508522	0.183566	0.0331066	0.135123	0.121545	0.890543	0.0591337	0.524222	0.0961511	0.301028	0.373505	0.914621
TCGA-78-8655	2360	0	0.735535	0.766262	0.424374	0.0394412	0.809805	0.902691	0.0520541	0.556037	0.268449	0.12291	0.864274	0.325958	0.827255	0.10405	0.915767	0.0928319	0.595357	0.0751207	0.796662	0.672779	0.90199	0.548699	0.858677	0.319387	0.594997	0.033843	0.108189	0.82875	0.47848	0.132529	0.521514	0.56777	0.106663	0.276314	0.865003	0.629256	0.127343	0.021724	0.155116	0.120904	0.888473	0.0430689	0.242533	0.0679409	0.28265	0.235967	0.921471
TCGA-83-5908	824	0	0.585814	0.607463	0.526243	0.0573906	0.825437	0.863344	0.0706757	0.585047	0.439214	0.233719	0.679779	0.507006	0.782058	0.118696	0.876232	0.186297	0.611302	0.114285	0.746223	0.830971	0.908185	0.691942	0.845434	0.166074	0.759038	0.0535617	0.101636	0.829723	0.424495	0.11422	0.393001	0.818049	0.104967	0.274051	0.751674	0.531276	0.244208	0.0328132	0.0907254	0.12414	0.891288	0.0590419	0.456511	0.0846561	0.427334	0.438134	0.916887
TCGA-62-8395	1216	0	0.745099	0.836854	0.523518	0.0294785	0.740626	0.894657	0.064343	0.434098	0.226661	0.0958636	0.794602	0.314669	0.782673	0.108532	0.908867	0.0614551	0.514032	0.0603954	0.623599	0.660443	0.878366	0.686714	0.865793	0.515667	0.815275	0.0441106	0.321171	0.851434	0.610796	0.201585	0.655297	0.812054	0.195618	0.150734	0.784271	0.70612	0.117537	0.0215567	0.116691	0.118203	0.880563	0.0335642	0.295608	0.0742526	0.288939	0.24381	0.900156
TCGA-95-7948	476	0	0.811658	0.86253	0.382818	0.0318134	0.592467	0.928117	0.0518823	0.465891	0.156307	0.111387	0.792233	0.154973	0.803496	0.113724	0.943628	0.0542226	0.592362	0.153898	0.617707	0.292387	0.902241	0.68869	0.905984	0.587195	0.340621	0.0375151	0.0530614	0.8316	0.289982	0.0996356	0.632877	0.671931	0.055097	0.121899	0.838464	0.551137	0.0824249	0.0226426	0.0844081	0.115408	0.849295	0.036344	0.182532	0.0631242	0.352122	0.299131	0.927212
TCGA-86-7714	625	1	0.795257	0.856411	0.669035	0.044905	0.867765	0.90919	0.0599943	0.645203	0.243606	0.0972779	0.885133	0.377108	0.828229	0.121162	0.90869	0.0511262	0.548294	0.102043	0.54973	0.791841	0.884614	0.507307	0.873457	0.427192	0.485662	0.0458075	0.111664	0.859034	0.217619	0.0988672	0.64523	0.822819	0.0927808	0.150755	0.872075	0.707651	0.144414	0.0264181	0.3084	0.121255	0.912416	0.0485681	0.269479	0.0701844	0.52269	0.280481	0.900516
TCGA-05-4405	610	0	0.71889	0.830431	0.56775	0.0311002	0.677783	0.909079	0.0738954	0.520725	0.185461	0.266557	0.75363	0.396042	0.758384	0.109567	0.904727	0.0654974	0.634272	0.169657	0.790687	0.499576	0.893667	0.683323	0.8632	0.442575	0.818937	0.0266315	0.229987	0.882791	0.364867	0.162291	0.460458	0.731917	0.384012	0.543206	0.820819	0.641957	0.143565	0.0250089	0.168633	0.118208	0.899153	0.0483952	0.341452	0.085797	0.412928	0.2458	0.758309
TCGA-97-8177	499	0	0.629378	0.743454	0.52424	0.0382592	0.681777	0.882784	0.0777575	0.545815	0.278682	0.165008	0.700414	0.397522	0.73778	0.117163	0.90722	0.0979102	0.685309	0.102345	0.746115	0.727899	0.873786	0.581127	0.829644	0.436193	0.788809	0.0584059	0.175479	0.827869	0.42297	0.194129	0.516163	0.648573	0.125416	0.237216	0.814972	0.538326	0.173061	0.0275604	0.178775	0.118382	0.898289	0.0423582	0.466971	0.0799696	0.235408	0.320809	0.917463
TCGA-50-6592	777	1	0.715685	0.694007	0.636675	0.0436141	0.80929	0.884247	0.054857	0.518971	0.332618	0.210958	0.758185	0.53386	0.814077	0.112279	0.942797	0.0964955	0.5745	0.307578	0.869155	0.832177	0.893138	0.53095	0.860866	0.243209	0.897721	0.0392558	0.0398085	0.852944	0.428456	0.155589	0.531219	0.764046	0.114038	0.188119	0.762134	0.515891	0.136035	0.0216446	0.221975	0.125819	0.784489	0.0331789	0.636912	0.0702751	0.245238	0.578058	0.93848
TCGA-62-8402	1498	1	0.691282	0.749431	0.348819	0.0418378	0.336085	0.910228	0.0681747	0.272173	0.391251	0.134054	0.871916	0.282326	0.719597	0.116139	0.916697	0.0900015	0.692936	0.0859868	0.556878	0.880446	0.892339	0.496904	0.852657	0.380167	0.869407	0.05916	0.0686435	0.84309	0.356132	0.0902844	0.452042	0.534965	0.089976	0.223062	0.482944	0.522622	0.120391	0.0446694	0.0815021	0.119967	0.896171	0.0433166	0.648164	0.0595831	0.148903	0.242748	0.93831
TCGA-55-A48Y	630	0	0.643212	0.764028	0.386477	0.0553924	0.662989	0.781674	0.0671979	0.514528	0.234693	0.175683	0.645303	0.665509	0.730967	0.115986	0.918573	0.0677626	0.629457	0.0920897	0.723042	0.73273	0.909531	0.587371	0.868282	0.255163	0.848479	0.0706048	0.0690638	0.86938	0.405023	0.102451	0.396231	0.677869	0.0909015	0.199249	0.816465	0.519075	0.106357	0.0374987	0.0967413	0.145676	0.863588	0.0599126	0.678489	0.0777858	0.406079	0.308351	0.942877
TCGA-73-4658	1600	1	0.655268	0.734398	0.593134	0.0419041	0.803336	0.887483	0.0699048	0.506232	0.250405	0.202448	0.791971	0.42457	0.78737	0.110237	0.886478	0.0812876	0.63861	0.161637	0.801502	0.824192	0.902728	0.672878	0.878235	0.312398	0.890144	0.037921	0.11857	0.875538	0.51071	0.210987	0.502874	0.774814	0.351167	0.424768	0.846151	0.601001	0.181263	0.0353873	0.296931	0.130109	0.88878	0.0436998	0.438741	0.0725451	0.417609	0.343023	0.940848
TCGA-MP-A4TH	741	0	0.607845	0.780176	0.352409	0.0398248	0.647961	0.752761	0.0749315	0.407554	0.18297	0.257318	0.771232	0.345088	0.689009	0.0942509	0.914683	0.0822008	0.593766	0.137199	0.637765	0.783596	0.868929	0.661902	0.884419	0.291636	0.742204	0.0713919	0.1717	0.862186	0.351143	0.135745	0.403782	0.583036	0.116625	0.528456	0.576158	0.498268	0.187964	0.0301587	0.160647	0.140545	0.848559	0.0620146	0.470881	0.0835424	0.43096	0.308385	0.93122
TCGA-95-8494	84	0	0.697794	0.843806	0.588572	0.0301449	0.524934	0.900224	0.051506	0.54989	0.313406	0.0692333	0.824333	0.316033	0.832142	0.106752	0.925789	0.050672	0.58074	0.136499	0.717541	0.729855	0.863086	0.820535	0.84542	0.106932	0.435773	0.0253189	0.401624	0.861681	0.507185	0.129119	0.277326	0.832231	0.360872	0.174547	0.762286	0.477029	0.118335	0.0226001	0.135008	0.0850375	0.754932	0.0463616	0.279359	0.0652744	0.516683	0.437725	0.917587
TCGA-49-6745	522	0	0.626101	0.767185	0.488337	0.02993	0.806289	0.89769	0.0745614	0.585891	0.269643	0.184545	0.819176	0.58673	0.764738	0.118223	0.910163	0.130459	0.61881	0.250398	0.81477	0.74425	0.898139	0.676151	0.891713	0.232202	0.620807	0.0110832	0.0478454	0.881666	0.325912	0.158621	0.467427	0.782282	0.165472	0.202726	0.854643	0.627801	0.197008	0.0187538	0.174392	0.0917475	0.901026	0.0969582	0.442103	0.0538295	0.297095	0.437255	0.925962
TCGA-78-7166	258	1	0.685194	0.77701	0.428852	0.0344007	0.812407	0.842668	0.086187	0.62256	0.170753	0.154097	0.459932	0.367093	0.790415	0.113525	0.929105	0.0722443	0.634375	0.0896242	0.762222	0.688288	0.908908	0.405387	0.856929	0.311086	0.842313	0.0372363	0.0383267	0.767694	0.53438	0.147802	0.509449	0.822138	0.0818887	0.212091	0.841271	0.613777	0.0690754	0.0232672	0.182462	0.0823037	0.835514	0.0315625	0.776695	0.0595549	0.177291	0.250992	0.948827
TCGA-44-8119	285	0	0.339679	0.680569	0.26026	0.0199891	0.277387	0.748242	0.0456615	0.0832057	0.0397368	0.0781743	0.83905	0.151261	0.66806	0.109342	0.903982	0.0424261	0.509291	0.0499546	0.403616	0.320904	0.897128	0.33265	0.836355	0.0443779	0.560163	0.0180402	0.0295964	0.884445	0.272545	0.0405824	0.202832	0.199809	0.0431484	0.109364	0.254575	0.264186	0.0757647	0.010624	0.0777733	0.107074	0.775038	0.0393699	0.203766	0.0488758	0.326655	0.149242	0.534223
TCGA-62-A46O	1454	1	0.7223	0.890161	0.644763	0.0520615	0.828615	0.868334	0.0712435	0.814155	0.465994	0.0754686	0.853786	0.221603	0.888588	0.112664	0.907931	0.0643763	0.692084	0.142541	0.843545	0.641986	0.908868	0.330811	0.867014	0.187632	0.856749	0.0572146	0.0723753	0.822641	0.644876	0.185497	0.682495	0.839463	0.086194	0.173597	0.723869	0.77856	0.111106	0.0238091	0.178806	0.0954338	0.325148	0.0443172	0.866622	0.0676602	0.157453	0.198608	0.922631
TCGA-55-8089	702	1	0.511558	0.59441	0.492998	0.0201963	0.689211	0.842969	0.051314	0.577196	0.250506	0.17388	0.644044	0.428561	0.725793	0.0942779	0.913486	0.113627	0.558423	0.130078	0.745992	0.651577	0.891841	0.475894	0.864942	0.151235	0.88066	0.0308381	0.0269255	0.863413	0.290978	0.123426	0.325911	0.774843	0.10159	0.167704	0.684956	0.459812	0.154703	0.0140714	0.120346	0.0911301	0.702505	0.0433525	0.627644	0.0549277	0.247221	0.485931	0.952507
TCGA-69-7763	690	0	0.722557	0.824383	0.502632	0.0474027	0.699008	0.894184	0.0701123	0.425686	0.230684	0.120936	0.699385	0.517564	0.77069	0.110594	0.898023	0.073543	0.601504	0.0661601	0.637463	0.816536	0.890956	0.599944	0.878372	0.503513	0.543811	0.0633694	0.136451	0.851252	0.422858	0.120602	0.512708	0.731987	0.0831079	0.141509	0.791667	0.633769	0.153506	0.0279042	0.315705	0.152103	0.889621	0.0586299	0.344209	0.0729082	0.486489	0.353992	0.919488
TCGA-NJ-A4YG	2261	0	0.64344	0.767378	0.478994	0.037127	0.74992	0.882197	0.0735726	0.355418	0.230278	0.195893	0.74274	0.566526	0.712352	0.110588	0.894601	0.0760714	0.602427	0.0887064	0.708941	0.793809	0.830574	0.612307	0.868545	0.332402	0.69296	0.09852	0.134831	0.807305	0.307514	0.131771	0.4769	0.770537	0.27022	0.344288	0.826277	0.572634	0.148899	0.0257603	0.161786	0.115622	0.857192	0.0438974	0.458967	0.0889357	0.368573	0.296484	0.899214
TCGA-62-A46P	594	1	0.794432	0.845743	0.654252	0.0579729	0.861977	0.903222	0.0788015	0.676712	0.159294	0.129054	0.852634	0.297983	0.826847	0.10804	0.848817	0.0581162	0.967852	0.130388	0.75695	0.660501	0.906737	0.6505	0.889861	0.695951	0.77605	0.0625848	0.149788	0.84723	0.40488	0.25153	0.631156	0.84412	0.113631	0.14007	0.850765	0.748843	0.104774	0.0351372	0.251053	0.107838	0.890465	0.0602048	0.351803	0.0790116	0.420632	0.25972	0.938726
TCGA-49-4514	1700	0	0.579889	0.670496	0.351108	0.0361822	0.724825	0.86603	0.049462	0.529863	0.284262	0.191744	0.557152	0.577805	0.645499	0.0997908	0.862441	0.104655	0.606208	0.0992884	0.817739	0.75602	0.898937	0.567863	0.843983	0.341697	0.798989	0.0399578	0.0513349	0.841671	0.391258	0.148705	0.415812	0.779645	0.112515	0.186546	0.769465	0.496199	0.145526	0.0248762	0.114052	0.111712	0.874658	0.0363447	0.649253	0.0580563	0.401249	0.32248	0.926228
TCGA-71-8520	210	1	0.742814	0.873168	0.670428	0.0303133	0.71747	0.869513	0.0485359	0.55048	0.301379	0.0759207	0.810509	0.506835	0.849703	0.0960343	0.952766	0.0487335	0.607292	0.0778755	0.602261	0.908352	0.911736	0.671964	0.904049	0.355417	0.832321	0.0294632	0.168586	0.881343	0.430585	0.104629	0.428359	0.62966	0.0967718	0.237873	0.871432	0.615692	0.100208	0.0282358	0.0774399	0.0963977	0.911921	0.027872	0.293681	0.0555454	0.282804	0.221197	0.940692
TCGA-NJ-A7XG	617	0	0.682956	0.790059	0.51197	0.0292202	0.757436	0.866555	0.0368803	0.484176	0.142365	0.0802618	0.77867	0.144014	0.814406	0.0844534	0.906719	0.0361392	0.515768	0.0554034	0.572511	0.833338	0.888966	0.505281	0.85499	0.324769	0.578548	0.0215355	0.057963	0.854696	0.229524	0.0756485	0.490758	0.767693	0.0633152	0.109914	0.770001	0.556275	0.0413341	0.0217358	0.129345	0.0955663	0.88806	0.0372364	0.201354	0.0486077	0.134377	0.181249	0.941259
TCGA-MN-A4N4	1175	0	0.684075	0.803847	0.489614	0.0339543	0.748915	0.856706	0.0597233	0.410451	0.172565	0.333	0.692395	0.164328	0.727141	0.0850733	0.782153	0.0559689	0.699067	0.0648229	0.800776	0.630532	0.883693	0.5257	0.819681	0.122031	0.859257	0.0291682	0.112307	0.88984	0.40874	0.0860077	0.558917	0.572258	0.0936482	0.120576	0.740903	0.421268	0.118084	0.0146155	0.0731782	0.0892877	0.868096	0.0411504	0.576278	0.0375524	0.232138	0.309956	0.554829
TCGA-55-7574	995	1	0.560167	0.685051	0.466636	0.0290675	0.593254	0.911863	0.0651287	0.49142	0.218825	0.19478	0.789741	0.470352	0.722373	0.0968064	0.903685	0.0925793	0.595998	0.100701	0.699883	0.761153	0.896269	0.705473	0.859138	0.348654	0.730047	0.0112373	0.172799	0.884337	0.352591	0.139956	0.419505	0.825386	0.145748	0.183261	0.770923	0.479158	0.183132	0.0288888	0.332567	0.0885075	0.847812	0.0398944	0.617311	0.0611017	0.359755	0.394332	0.924958
TCGA-50-5941	1474	0	0.592671	0.718104	0.543179	0.0446914	0.624261	0.846582	0.0710035	0.406236	0.344674	0.22998	0.818228	0.512326	0.70253	0.124224	0.877004	0.158944	0.620692	0.134104	0.754753	0.7433	0.913065	0.622805	0.880754	0.26895	0.642684	0.0322563	0.0823551	0.859755	0.370745	0.184154	0.415911	0.757977	0.123193	0.251672	0.717891	0.484782	0.173	0.022648	0.129231	0.122607	0.851396	0.0577268	0.511763	0.0675665	0.313669	0.323876	0.937097
TCGA-64-5774	2676	0	0.722721	0.877071	0.701059	0.030247	0.4357	0.654155	0.0585404	0.486551	0.123944	0.0655041	0.605347	0.17153	0.82272	0.0839785	0.924295	0.0415922	0.694416	0.0662973	0.314917	0.709577	0.899287	0.317788	0.875256	0.189687	0.69715	0.043715	0.059014	0.822665	0.178153	0.134352	0.482436	0.787657	0.04395	0.356882	0.741495	0.356459	0.103141	0.025095	0.0989259	0.11312	0.626031	0.0411008	0.21548	0.0451744	0.751237	0.160024	0.955191
TCGA-86-A4JF	737	1	0.508199	0.765957	0.447746	0.0294946	0.688466	0.868223	0.0441815	0.403462	0.302727	0.150183	0.81297	0.360179	0.792307	0.0740663	0.92941	0.0781405	0.632194	0.118981	0.711535	0.710242	0.90509	0.651936	0.877566	0.175998	0.861548	0.0412085	0.0292823	0.834458	0.350723	0.123669	0.425171	0.799526	0.192697	0.216984	0.775877	0.601112	0.092042	0.0204594	0.111424	0.0882926	0.878289	0.0299403	0.420694	0.0477964	0.2986	0.309576	0.932996
TCGA-55-6981	1379	1	0.682028	0.771464	0.500393	0.0717918	0.737347	0.794646	0.0973728	0.450191	0.357212	0.209213	0.616175	0.418681	0.775997	0.133589	0.901608	0.109995	0.646836	0.105322	0.768188	0.738514	0.877449	0.652083	0.870932	0.257378	0.716591	0.0836012	0.161001	0.922279	0.439124	0.154165	0.537757	0.741573	0.115641	0.258318	0.819587	0.538743	0.200968	0.039698	0.148992	0.171833	0.853859	0.0866795	0.476461	0.110387	0.2773	0.356522	0.907297
TCGA-86-8668	423	0	0.739148	0.807509	0.401425	0.0433405	0.600324	0.86311	0.0588502	0.370697	0.230838	0.158926	0.827869	0.295071	0.82628	0.116772	0.90959	0.093649	0.61283	0.108585	0.504927	0.508724	0.883348	0.643676	0.87043	0.611145	0.491794	0.0390321	0.0957861	0.851021	0.306867	0.0886667	0.510653	0.457739	0.128213	0.134499	0.850561	0.604231	0.126119	0.0341379	0.0898542	0.123083	0.805203	0.0460097	0.434511	0.0837235	0.227519	0.247773	0.918931
TCGA-78-7155	1171	1	0.700831	0.752051	0.208202	0.0377916	0.716924	0.868352	0.0814246	0.536599	0.700648	0.113942	0.877781	0.637037	0.907067	0.0943339	0.876196	0.0925797	0.796659	0.0393038	0.223991	0.899945	0.885002	0.48337	0.881766	0.242064	0.841582	0.0623047	0.0316532	0.781998	0.731232	0.46859	0.61475	0.490883	0.0803838	0.121377	0.83599	0.673724	0.146859	0.0251659	0.191475	0.0836671	0.590786	0.0422825	0.791829	0.0697378	0.165887	0.171545	0.921515
TCGA-86-8075	694	1	0.679381	0.816819	0.638031	0.0219634	0.747852	0.856271	0.0679628	0.189282	0.353323	0.100743	0.735933	0.6098	0.820816	0.105051	0.870423	0.0618872	0.574833	0.11017	0.895172	0.644625	0.8629	0.642089	0.84811	0.197839	0.759982	0.0121422	0.0278729	0.863093	0.394779	0.0894827	0.655324	0.436221	0.0712923	0.105139	0.86995	0.532998	0.0970593	0.0185967	0.134559	0.0809379	0.930219	0.038606	0.286853	0.0653337	0.228132	0.257256	0.956888
TCGA-55-7576	670	0	0.775801	0.785384	0.552772	0.0498386	0.85755	0.932344	0.0543914	0.622857	0.251959	0.196402	0.862023	0.367218	0.849851	0.133053	0.935602	0.120401	0.683091	0.199739	0.789048	0.780119	0.921822	0.591502	0.891638	0.392326	0.510642	0.0142045	0.121467	0.884519	0.5638	0.183097	0.59441	0.84866	0.250427	0.241656	0.875546	0.710196	0.122229	0.0261168	0.373316	0.136205	0.930467	0.0539214	0.418054	0.0674356	0.404375	0.338625	0.930454
TCGA-05-5429	275	1	0.787237	0.683742	0.327877	0.0333472	0.826948	0.874678	0.0390796	0.680674	0.124051	0.108341	0.228665	0.270941	0.820616	0.096739	0.874975	0.0348718	0.601416	0.061122	0.840702	0.808783	0.902085	0.479847	0.885343	0.0965979	0.869263	0.0426258	0.0465451	0.853445	0.338416	0.0558476	0.521644	0.775598	0.282986	0.109057	0.687021	0.710767	0.113504	0.0198156	0.0792911	0.115091	0.71654	0.0337868	0.792251	0.0627797	0.246221	0.221768	0.963007
TCGA-50-5044	624	1	0.633369	0.716034	0.495428	0.0367426	0.639761	0.770035	0.0621063	0.44962	0.364423	0.151055	0.726957	0.560423	0.65658	0.0807462	0.891888	0.0943165	0.591228	0.213475	0.739374	0.769118	0.897158	0.551547	0.841083	0.209761	0.721413	0.0280618	0.111336	0.860534	0.485688	0.294719	0.43694	0.714127	0.159354	0.173502	0.788406	0.535772	0.121481	0.0212629	0.297108	0.128112	0.732492	0.0539352	0.470734	0.208881	0.355621	0.497345	0.930574
TCGA-05-4390	1126	0	0.64412	0.91241	0.534115	0.0436403	0.681325	0.870176	0.0564368	0.590741	0.175426	0.0884047	0.834195	0.235956	0.85817	0.113973	0.942311	0.0461258	0.673944	0.105177	0.454726	0.656616	0.916808	0.50016	0.848019	0.166947	0.882816	0.0247553	0.101699	0.849191	0.320995	0.129524	0.574404	0.755254	0.0863022	0.0932254	0.663825	0.602496	0.0828789	0.0300916	0.170838	0.132059	0.539426	0.0489084	0.662569	0.0600516	0.391431	0.179242	0.943359
TCGA-97-8175	551	0	0.703075	0.751785	0.479798	0.0303002	0.743748	0.913676	0.0544808	0.347792	0.382213	0.152574	0.880175	0.348642	0.814035	0.11711	0.938501	0.0636316	0.556812	0.165851	0.703024	0.858608	0.880368	0.646627	0.836047	0.154232	0.647223	0.0345467	0.0477265	0.883626	0.397416	0.12116	0.399214	0.770957	0.249597	0.127476	0.855448	0.576946	0.114828	0.0142618	0.130395	0.116575	0.89015	0.0441691	0.489796	0.0684581	0.316586	0.343851	0.930025
TCGA-62-A46U	2067	0	0.553089	0.669973	0.593655	0.0533953	0.883834	0.905132	0.0749905	0.654411	0.322332	0.23331	0.846002	0.50269	0.732129	0.111831	0.890151	0.148301	0.577321	0.239055	0.532573	0.663886	0.903902	0.762765	0.872364	0.393989	0.690686	0.0421823	0.118267	0.866341	0.375236	0.138914	0.497471	0.860016	0.130371	0.294084	0.815137	0.551276	0.200574	0.0385494	0.126284	0.138741	0.898638	0.0606913	0.427149	0.0721134	0.389074	0.289006	0.941634
TCGA-55-6983	2823	0	0.658131	0.770255	0.456557	0.0539875	0.651791	0.843318	0.0918374	0.542543	0.276038	0.225358	0.790766	0.381078	0.697353	0.118223	0.803448	0.0903327	0.612944	0.115702	0.766707	0.624064	0.878447	0.625155	0.866072	0.412983	0.509117	0.0422093	0.0766646	0.853253	0.305164	0.162338	0.47031	0.778248	0.130184	0.333972	0.808631	0.566918	0.154305	0.0316343	0.163365	0.126253	0.882204	0.0662713	0.513913	0.0816806	0.521709	0.325911	0.915379
TCGA-50-5930	282	1	0.651313	0.745421	0.438591	0.0376768	0.711899	0.856513	0.0602002	0.406766	0.298977	0.212462	0.670001	0.42967	0.717478	0.113138	0.908842	0.0988744	0.743918	0.0827669	0.832068	0.757089	0.898318	0.460415	0.866256	0.336217	0.88449	0.0211051	0.0622803	0.861496	0.401553	0.171537	0.494885	0.685447	0.0969188	0.128879	0.703765	0.461621	0.153105	0.0188509	0.11157	0.112657	0.873399	0.0564684	0.711353	0.0582278	0.263152	0.320776	0.93709
TCGA-MP-A4TD	307	1	0.701398	0.81248	0.629153	0.0589916	0.736085	0.837739	0.0774195	0.468369	0.390309	0.178626	0.700968	0.424939	0.769858	0.101424	0.855515	0.0824827	0.661503	0.115727	0.710138	0.729088	0.898188	0.662502	0.895985	0.399103	0.78547	0.0610715	0.250668	0.815616	0.348592	0.1527	0.523543	0.806711	0.102318	0.27253	0.781972	0.59708	0.224417	0.0424575	0.134436	0.133902	0.857091	0.0497775	0.487515	0.0659916	0.480646	0.262331	0.906432
TCGA-97-7554	775	0	0.546075	0.698515	0.476629	0.0343459	0.655583	0.874055	0.100341	0.443052	0.381593	0.495414	0.812617	0.292541	0.840193	0.100931	0.854076	0.0961282	0.544827	0.0977726	0.798673	0.842257	0.920589	0.68027	0.894646	0.23338	0.908206	0.1058	0.131451	0.848227	0.309986	0.268074	0.333539	0.857581	0.333404	0.156986	0.842541	0.610968	0.123156	0.156039	0.0831626	0.0992907	0.610562	0.0385913	0.623848	0.057293	0.500248	0.306352	0.955902
TCGA-73-A9RS	340	1	0.773052	0.819943	0.73494	0.0319411	0.811698	0.925987	0.0350031	0.712857	0.207051	0.127118	0.805501	0.315199	0.844874	0.0766419	0.902778	0.0896009	0.696999	0.20596	0.903768	0.644612	0.915008	0.552243	0.888638	0.557851	0.874875	0.109265	0.102085	0.875967	0.603658	0.145853	0.653352	0.860176	0.0951765	0.205252	0.780174	0.742638	0.0869694	0.0299391	0.313862	0.0784596	0.887638	0.0423901	0.82394	0.0537945	0.191388	0.253861	0.919831
TCGA-78-7539	791	0	0.694433	0.815908	0.637301	0.0370037	0.845229	0.882894	0.0585579	0.528502	0.149095	0.179524	0.837677	0.625116	0.826101	0.106341	0.919157	0.135167	0.652671	0.071718	0.601638	0.821224	0.917339	0.51068	0.868134	0.32423	0.733602	0.0340337	0.0610952	0.8235	0.490292	0.133163	0.493625	0.515097	0.10019	0.26225	0.294515	0.444048	0.250302	0.0146735	0.122056	0.1267	0.93239	0.0473503	0.33261	0.0698033	0.208293	0.253507	0.948386
TCGA-97-A4M6	568	0	0.619172	0.768267	0.514478	0.0262752	0.805703	0.886849	0.0514582	0.447362	0.256148	0.147332	0.780125	0.460615	0.707411	0.0847584	0.907357	0.0824365	0.60681	0.0788184	0.786724	0.810404	0.916371	0.648129	0.905023	0.505113	0.676721	0.0262644	0.054767	0.855303	0.428576	0.188297	0.55757	0.613475	0.0828089	0.187577	0.749453	0.595708	0.17298	0.018696	0.188489	0.118892	0.898633	0.0422058	0.525087	0.0476711	0.226643	0.310193	0.921881
TCGA-78-7147	586	1	0.733898	0.84858	0.407204	0.0310972	0.809701	0.897637	0.0571024	0.644434	0.291612	0.0975139	0.900095	0.321785	0.874184	0.104361	0.904721	0.0807172	0.806959	0.0940915	0.642174	0.524139	0.9152	0.686061	0.880753	0.303189	0.523801	0.11872	0.0524819	0.825606	0.255841	0.131546	0.592548	0.494943	0.0931146	0.205309	0.47064	0.554648	0.125959	0.0235224	0.119354	0.0997191	0.927543	0.0346258	0.251712	0.0721476	0.16782	0.227573	0.915278
TCGA-86-7953	997	0	0.64059	0.725144	0.471245	0.0468259	0.788653	0.879824	0.0723195	0.497144	0.228573	0.134458	0.512435	0.42659	0.787307	0.102196	0.730475	0.067766	0.562232	0.0905719	0.622905	0.611306	0.893216	0.442976	0.834038	0.373563	0.758466	0.0463012	0.0523111	0.834871	0.263984	0.124565	0.490879	0.677596	0.0888531	0.183103	0.632562	0.442713	0.15906	0.0345221	0.108809	0.101572	0.886556	0.0416753	0.336364	0.0657354	0.195564	0.28624	0.854127
TCGA-62-8397	1289	0	0.781699	0.878496	0.766699	0.0411829	0.826185	0.902282	0.0502713	0.272616	0.292764	0.07458	0.896266	0.457967	0.838376	0.108582	0.700269	0.050323	0.562625	0.0615406	0.293558	0.66077	0.902449	0.69618	0.881741	0.654405	0.353804	0.0629574	0.038002	0.858267	0.376347	0.1159	0.614553	0.625338	0.0767132	0.0954257	0.876293	0.633801	0.119765	0.0261645	0.107981	0.10324	0.914767	0.0385111	0.215696	0.0679125	0.121692	0.172433	0.934241
TCGA-73-4676	281	1	0.776193	0.537797	0.673214	0.0339057	0.787629	0.907631	0.0670106	0.654129	0.545171	0.0975116	0.85811	0.301722	0.818796	0.108562	0.931986	0.0586415	0.743996	0.0987328	0.58589	0.823133	0.893865	0.49149	0.893068	0.256635	0.471474	0.0885355	0.122146	0.899105	0.367696	0.164629	0.571636	0.847909	0.102588	0.142489	0.826733	0.695405	0.142266	0.0269504	0.101228	0.113368	0.658954	0.0464217	0.376109	0.132152	0.518974	0.357851	0.934633
TCGA-50-6590	1288	1	0.56749	0.728508	0.494329	0.0304048	0.690692	0.845048	0.0541441	0.535907	0.249031	0.241289	0.837822	0.458782	0.726789	0.105928	0.930458	0.0836275	0.592355	0.125063	0.712371	0.643186	0.906666	0.711037	0.879518	0.131412	0.886233	0.0164606	0.11753	0.858927	0.282592	0.103996	0.465103	0.736124	0.109651	0.176236	0.790877	0.498068	0.186912	0.0169614	0.108536	0.101889	0.746088	0.0344839	0.679414	0.0643594	0.354235	0.456519	0.945777
TCGA-05-5420	457	0	0.497189	0.641186	0.476003	0.0348352	0.617904	0.811583	0.057428	0.513397	0.246142	0.192295	0.745342	0.407879	0.709752	0.10164	0.883525	0.115985	0.606378	0.102176	0.709714	0.747955	0.887625	0.493578	0.87721	0.324127	0.838712	0.0413599	0.0527845	0.754743	0.393151	0.161985	0.427814	0.767142	0.100538	0.211026	0.684005	0.469108	0.198868	0.0193046	0.101056	0.0905262	0.808942	0.034431	0.630354	0.0651858	0.255697	0.399752	0.927552
TCGA-MP-A4TF	336	1	0.791723	0.822658	0.607193	0.0491757	0.783649	0.862045	0.0738847	0.58078	0.361026	0.156235	0.494555	0.743113	0.780549	0.123277	0.902894	0.0854419	0.991705	0.38446	0.817781	0.822486	0.890535	0.567299	0.888231	0.202266	0.621063	0.088535	0.111863	0.876632	0.576643	0.212288	0.590908	0.814133	0.0912979	0.256064	0.814292	0.60135	0.15187	0.0299021	0.238982	0.116735	0.673433	0.0546629	0.705396	0.487369	0.372137	0.625964	0.924439
TCGA-86-8673	862	0	0.746358	0.803809	0.595595	0.0249128	0.869597	0.894711	0.0742845	0.573131	0.148789	0.138081	0.841879	0.444372	0.835293	0.1075	0.740743	0.08792	0.75802	0.368424	0.73609	0.625885	0.914474	0.521039	0.888964	0.364056	0.501104	0.0428903	0.324384	0.844814	0.428902	0.14307	0.600872	0.700256	0.078942	0.18814	0.88696	0.659618	0.119178	0.0349095	0.206237	0.109968	0.935799	0.0458675	0.351848	0.0763396	0.29094	0.314629	0.935205
TCGA-MP-A4SV	2620	1	0.316823	0.649773	0.384526	0.0271076	0.49701	0.804763	0.0550342	0.354423	0.191599	0.258465	0.704509	0.335786	0.578008	0.0966886	0.895717	0.139502	0.606929	0.1381	0.584033	0.635094	0.897688	0.622667	0.834612	0.176097	0.858041	0.0501414	0.0577522	0.852558	0.43723	0.0873065	0.29419	0.715294	0.180203	0.200544	0.49046	0.521599	0.161569	0.0342932	0.14746	0.107629	0.640062	0.045896	0.431756	0.0659971	0.539877	0.279382	0.913344
TCGA-50-5939	460	1	0.731652	0.792712	0.513702	0.0208141	0.726953	0.8807	0.0463773	0.464042	0.394474	0.155688	0.803113	0.518982	0.750087	0.087387	0.91174	0.0555873	0.612601	0.103503	0.775972	0.786102	0.903453	0.598133	0.91755	0.142839	0.84857	0.0434859	0.0463931	0.844157	0.481113	0.19304	0.487531	0.765701	0.0636093	0.204774	0.802007	0.527051	0.120108	0.021864	0.133915	0.08873	0.883839	0.0320472	0.667849	0.0622008	0.233402	0.48729	0.929133
TCGA-62-A470	1194	1	0.746978	0.584089	0.310625	0.0532764	0.465044	0.660109	0.059506	0.242038	0.390691	0.151862	0.450734	0.319752	0.832982	0.105963	0.823253	0.055442	0.597241	0.0767662	0.455612	0.733529	0.919594	0.398734	0.853679	0.138836	0.831548	0.037005	0.0570495	0.837511	0.447051	0.123713	0.445243	0.76018	0.0652306	0.167308	0.405167	0.536788	0.128488	0.0344918	0.127265	0.127454	0.895112	0.0523047	0.39429	0.164585	0.519567	0.214641	0.91977
TCGA-95-7947	477	0	0.692541	0.806007	0.549871	0.0321712	0.72953	0.841211	0.0589402	0.633046	0.242384	0.102905	0.847464	0.443492	0.814329	0.0920322	0.364731	0.0839158	0.527727	0.102666	0.815839	0.420661	0.878575	0.710082	0.866406	0.155562	0.854586	0.0276467	0.0417113	0.830283	0.284404	0.0867713	0.54311	0.803364	0.0837455	0.123118	0.86696	0.604727	0.113979	0.022443	0.22971	0.0855839	0.893798	0.0285637	0.805515	0.0474386	0.137037	0.290343	0.896238
TCGA-55-7910	1040	0	0.773403	0.784802	0.528361	0.0328023	0.721269	0.852302	0.0578111	0.662551	0.366342	0.105494	0.841852	0.387371	0.809758	0.11133	0.883674	0.0839098	0.570408	0.0916305	0.632652	0.592326	0.885569	0.470099	0.832296	0.494586	0.855821	0.0346159	0.0739884	0.790181	0.289217	0.14527	0.649521	0.837332	0.0676325	0.264896	0.689413	0.653474	0.149915	0.0425886	0.246812	0.0905887	0.873319	0.0567395	0.333619	0.0909526	0.183087	0.166087	0.921922
TCGA-55-6975	118	1	0.621473	0.80924	0.615332	0.0248242	0.674871	0.769234	0.0614118	0.561065	0.259295	0.229012	0.641991	0.378254	0.633765	0.356565	0.905882	0.0727826	0.636834	0.135011	0.728738	0.694405	0.865829	0.391476	0.837361	0.114038	0.835147	0.162701	0.0552926	0.638955	0.539724	0.218626	0.42626	0.769966	0.119033	0.225769	0.579428	0.633653	0.180767	0.0296023	0.310064	0.0981077	0.810899	0.0304184	0.724294	0.101116	0.34722	0.269763	0.947763
TCGA-78-7162	3169	1	0.727519	0.831284	0.406755	0.0473697	0.668452	0.910465	0.0696479	0.398176	0.248419	0.207797	0.835936	0.373036	0.760867	0.120765	0.946317	0.0765358	0.649826	0.118504	0.645659	0.78782	0.913475	0.565661	0.89326	0.461514	0.630583	0.014817	0.0609588	0.895504	0.54341	0.135861	0.482441	0.61264	0.107502	0.197259	0.808373	0.673457	0.166425	0.0183584	0.240901	0.140169	0.913987	0.0520282	0.386618	0.0699621	0.287698	0.370572	0.94503
TCGA-91-6828	323	0	0.672702	0.818818	0.585246	0.0403415	0.741259	0.86973	0.081541	0.608592	0.299482	0.197993	0.832496	0.706777	0.757427	0.0957764	0.877643	0.0717617	0.546314	0.10045	0.611374	0.690425	0.86778	0.625154	0.830752	0.420949	0.870131	0.0359911	0.081729	0.865592	0.452052	0.12724	0.534458	0.7981	0.113374	0.145899	0.756259	0.607078	0.139447	0.0211855	0.23951	0.113894	0.880881	0.045935	0.338195	0.0625914	0.462576	0.292143	0.913064
TCGA-05-4415	91	1	0.745523	0.8331	0.669036	0.0290445	0.794181	0.868563	0.0453111	0.752965	0.304072	0.092111	0.883965	0.609476	0.872028	0.116662	0.954176	0.0693241	0.538813	0.21976	0.836177	0.875173	0.928022	0.338128	0.877608	0.111317	0.878231	0.02029	0.073469	0.853942	0.643422	0.149847	0.601481	0.799835	0.114723	0.0811396	0.761531	0.629188	0.116977	0.0238827	0.15205	0.0926913	0.629561	0.0270852	0.79324	0.0679519	0.175999	0.247067	0.950708
TCGA-55-8203	547	0	0.61308	0.713807	0.409173	0.032828	0.622242	0.880167	0.0679632	0.420663	0.304956	0.182464	0.704047	0.257167	0.730263	0.11223	0.909431	0.0700625	0.531766	0.0675263	0.591181	0.624487	0.860248	0.543804	0.847431	0.387887	0.793052	0.0273396	0.0969379	0.858278	0.222263	0.105565	0.45896	0.834235	0.0764752	0.168879	0.746429	0.566129	0.14578	0.0215627	0.139888	0.106966	0.898743	0.0292339	0.444564	0.197646	0.557597	0.208435	0.929748
TCGA-69-7980	411	0	0.740341	0.753163	0.620651	0.0426376	0.801072	0.874684	0.056199	0.407227	0.221762	0.120281	0.816266	0.474469	0.850263	0.102954	0.92188	0.0638036	0.309563	0.449911	0.839604	0.844155	0.88071	0.682227	0.85556	0.245298	0.885316	0.0179815	0.125735	0.835339	0.479961	0.260102	0.583801	0.80404	0.078231	0.124322	0.821868	0.644819	0.127442	0.0253248	0.321007	0.0892444	0.875565	0.0444801	0.858812	0.0446395	0.121967	0.20554	0.916068
TCGA-44-3918	1036	0	0.51952	0.659077	0.624939	0.0305533	0.757196	0.860922	0.0896621	0.627667	0.355101	0.419285	0.765927	0.312173	0.711257	0.116957	0.851697	0.126487	0.494053	0.237988	0.529994	0.710856	0.879178	0.674932	0.862685	0.165388	0.659492	0.0871275	0.222486	0.75393	0.24899	0.123892	0.454966	0.84293	0.134227	0.172865	0.762565	0.50064	0.154069	0.0489529	0.144179	0.119957	0.888173	0.0514512	0.346291	0.118975	0.266383	0.259795	0.90569
TCGA-78-7143	4961	1	0.746589	0.853667	0.698272	0.0245046	0.775744	0.922304	0.0735037	0.573325	0.172466	0.127352	0.850504	0.573645	0.856191	0.110917	0.899862	0.0463867	0.550727	0.0927074	0.682952	0.562716	0.909091	0.696496	0.887908	0.39848	0.514196	0.0169512	0.041448	0.876166	0.276913	0.180099	0.588345	0.449613	0.09795	0.15355	0.847619	0.676997	0.117673	0.0262588	0.106472	0.105676	0.934916	0.0404723	0.31159	0.0619626	0.360527	0.251705	0.925495
TCGA-78-8660	321	1	0.545547	0.695488	0.459289	0.0255281	0.549327	0.870036	0.0413998	0.465286	0.18957	0.218498	0.696133	0.426891	0.796148	0.0982034	0.939527	0.107183	0.627069	0.104687	0.599066	0.794835	0.890717	0.635885	0.858855	0.215819	0.751343	0.0397221	0.114589	0.846191	0.322137	0.115365	0.316936	0.697041	0.0838483	0.261243	0.789971	0.571627	0.179467	0.0306291	0.152261	0.10422	0.880268	0.0450615	0.52612	0.0548181	0.420049	0.395181	0.933228
TCGA-78-7158	179	1	0.842438	0.856902	0.469501	0.0291281	0.760563	0.906223	0.0503157	0.534613	0.26405	0.0785423	0.877613	0.213949	0.845602	0.104626	0.894077	0.0461666	0.612088	0.0940633	0.279408	0.443963	0.915777	0.502587	0.895354	0.694368	0.755282	0.025406	0.0804459	0.852672	0.17688	0.0881263	0.661342	0.433925	0.0920084	0.141987	0.866259	0.611455	0.103248	0.0294927	0.306074	0.120168	0.886707	0.0341409	0.390422	0.0598181	0.769758	0.17752	0.935678
TCGA-86-8671	839	0	0.450419	0.593646	0.478238	0.0365928	0.621425	0.901203	0.0662955	0.431253	0.2205	0.295377	0.792972	0.458985	0.670556	0.0914816	0.881338	0.142519	0.572888	0.0926564	0.66043	0.734174	0.835322	0.616281	0.851314	0.275757	0.815742	0.192763	0.0412366	0.841836	0.299045	0.150243	0.392579	0.659704	0.11965	0.336494	0.803733	0.437098	0.244279	0.0265282	0.105086	0.111603	0.901166	0.035994	0.65875	0.0748087	0.271878	0.401278	0.921222
TCGA-86-8585	353	0	0.546114	0.693843	0.342852	0.0268367	0.633184	0.835476	0.0526595	0.583678	0.32987	0.213182	0.634327	0.310012	0.715046	0.0925937	0.91569	0.108546	0.569845	0.084907	0.79537	0.706333	0.88408	0.475585	0.834141	0.156729	0.82576	0.011264	0.0455493	0.840313	0.330139	0.148074	0.452993	0.793493	0.113017	0.215748	0.758477	0.549589	0.212813	0.0261449	0.113386	0.0688951	0.81378	0.0365153	0.720986	0.0563927	0.270269	0.432542	0.943728
TCGA-55-6987	2137	0	0.545584	0.624512	0.360175	0.0721551	0.575497	0.890032	0.0863941	0.490901	0.335875	0.269471	0.697888	0.503756	0.643915	0.0957182	0.864233	0.144372	0.582975	0.197754	0.736272	0.709808	0.86906	0.634872	0.848487	0.273552	0.83917	0.0924112	0.0860263	0.840851	0.415793	0.218338	0.383066	0.82713	0.14653	0.280177	0.734095	0.452487	0.248992	0.0429875	0.163205	0.157045	0.841126	0.0744476	0.575831	0.0646118	0.410568	0.450221	0.896286
TCGA-78-8648	1209	1	0.498499	0.695721	0.39543	0.0316271	0.564031	0.871763	0.0369454	0.304007	0.224252	0.252322	0.72979	0.411526	0.652444	0.084027	0.926713	0.129616	0.596574	0.115808	0.787055	0.717899	0.892209	0.642305	0.861652	0.200579	0.86028	0.0528176	0.0346909	0.850922	0.36226	0.143116	0.404103	0.737296	0.0879593	0.219945	0.764408	0.42515	0.244835	0.0291871	0.117096	0.0915237	0.85888	0.0302012	0.685551	0.0556886	0.354975	0.392249	0.926053
TCGA-44-7671	889	0	0.797957	0.817785	0.300587	0.0430517	0.790618	0.879318	0.0717506	0.330035	0.139114	0.12236	0.833777	0.412942	0.900193	0.115534	0.940635	0.0486545	0.731289	0.080049	0.60655	0.649261	0.935252	0.544529	0.904356	0.629145	0.364251	0.0308074	0.0634462	0.847906	0.336125	0.130246	0.535406	0.656857	0.0867187	0.676589	0.798845	0.612462	0.113629	0.0197354	0.128726	0.138125	0.900779	0.0461382	0.225635	0.0748352	0.691655	0.232058	0.942429
TCGA-05-4427	791	0	0.643251	0.493016	0.273193	0.0390506	0.788782	0.922454	0.0607443	0.397177	0.484436	0.471797	0.851033	0.32524	0.699808	0.0981521	0.947655	0.0817404	0.755665	0.323574	0.429978	0.737396	0.908574	0.278999	0.885875	0.0994711	0.573518	0.000976768	0.033617	0.856173	0.268256	0.103569	0.557719	0.862856	0.0935057	0.179818	0.723066	0.585436	0.0810374	0.0171074	0.104377	0.0890271	0.701537	0.0430571	0.306976	0.0598795	0.610238	0.219872	0.941844
TCGA-64-5815	866	0	0.685534	0.764553	0.524519	0.0318332	0.775758	0.905411	0.0599482	0.48914	0.3872	0.161097	0.603372	0.564874	0.742125	0.105477	0.894689	0.0903999	0.571833	0.103763	0.852136	0.859532	0.874089	0.667949	0.898789	0.364977	0.789712	0.0436586	0.379358	0.813723	0.525389	0.189991	0.508746	0.797209	0.100416	0.294106	0.813477	0.648254	0.129532	0.0269535	0.147386	0.0996519	0.888155	0.0461026	0.407215	0.0448903	0.297633	0.309192	0.917195
TCGA-97-A4M2	624	0	0.659416	0.784619	0.420521	0.0287071	0.615377	0.89057	0.0519517	0.304863	0.186636	0.159581	0.790688	0.451715	0.712377	0.0750547	0.867145	0.0642712	0.610193	0.0981987	0.653263	0.776147	0.892385	0.661228	0.90023	0.342384	0.628107	0.0550771	0.0387234	0.839261	0.401906	0.12509	0.454214	0.688109	0.10358	0.297626	0.821766	0.548544	0.122686	0.0250864	0.0842143	0.0736854	0.889075	0.039941	0.474368	0.0428384	0.257761	0.368499	0.940436
TCGA-55-A48X	689	0	0.58514	0.785305	0.496623	0.0368801	0.59965	0.842939	0.0726983	0.443216	0.318465	0.284127	0.829743	0.397178	0.70874	0.115404	0.899373	0.120097	0.61919	0.103194	0.681314	0.674714	0.870969	0.669129	0.868726	0.378507	0.701764	0.0383818	0.132107	0.850829	0.429144	0.173494	0.476165	0.786774	0.104253	0.263994	0.807076	0.458604	0.211395	0.0383022	0.169916	0.133553	0.887816	0.0602068	0.603567	0.0802598	0.287023	0.316717	0.888023
TCGA-50-5933	2393	1	0.680582	0.699899	0.600054	0.0494276	0.787758	0.884558	0.107998	0.569555	0.367498	0.617043	0.628727	0.487566	0.745134	0.110803	0.931472	0.110971	0.634221	0.151242	0.793126	0.729273	0.902956	0.658358	0.869218	0.139729	0.75738	0.0278578	0.076109	0.873802	0.429707	0.165398	0.449349	0.67176	0.264301	0.108045	0.790577	0.618835	0.130822	0.0381045	0.155348	0.109368	0.686146	0.0509542	0.414601	0.0677702	0.476598	0.39807	0.92294
TCGA-55-6980	2109	0	0.517268	0.697382	0.475242	0.0548526	0.849386	0.826863	0.0712709	0.371058	0.394348	0.152351	0.729605	0.548246	0.739529	0.11036	0.782615	0.104777	0.603035	0.12509	0.735933	0.754826	0.907892	0.616442	0.851417	0.319733	0.733078	0.0358311	0.0613611	0.845906	0.439027	0.125271	0.502123	0.538803	0.141172	0.252331	0.808839	0.53577	0.278433	0.0284989	0.149775	0.12717	0.883434	0.0592751	0.495392	0.0763238	0.262443	0.366545	0.903852
TCGA-38-A44F	133	0	0.572734	0.692647	0.431561	0.0477414	0.632509	0.880666	0.0710564	0.427238	0.190623	0.249595	0.654584	0.426153	0.685821	0.113718	0.90556	0.113648	0.625014	0.107501	0.71724	0.733666	0.898756	0.51702	0.857667	0.273573	0.788661	0.0405849	0.0534426	0.871805	0.411389	0.149318	0.478297	0.660162	0.109465	0.225725	0.83674	0.527085	0.166681	0.0411141	0.118491	0.106388	0.871535	0.0674563	0.642742	0.0827895	0.293103	0.396013	0.948839
TCGA-97-8176	468	1	0.81793	0.859481	0.499507	0.0449933	0.753294	0.835726	0.053089	0.297298	0.259614	0.0995553	0.394461	0.63527	0.850789	0.120807	0.949598	0.0530023	0.64631	0.0829655	0.855182	0.71951	0.882512	0.384678	0.860062	0.194113	0.713667	0.0256022	0.0354464	0.867685	0.473153	0.140119	0.474161	0.82156	0.0818899	0.101547	0.742031	0.544951	0.119367	0.0258399	0.221729	0.0860359	0.783873	0.0502014	0.760579	0.0628907	0.187542	0.298677	0.948385
TCGA-05-5715	62	0	0.822901	0.892425	0.691991	0.0302548	0.812403	0.83811	0.0489505	0.660859	0.132901	0.079093	0.836418	0.35122	0.871417	0.0874858	0.898412	0.0454388	0.564045	0.0596549	0.850361	0.760842	0.881561	0.652788	0.896389	0.488101	0.910814	0.0329483	0.268092	0.834368	0.625774	0.0787139	0.621224	0.851125	0.0580182	0.101404	0.859392	0.718897	0.0861723	0.0181781	0.161803	0.11164	0.925428	0.0371523	0.359052	0.0500176	0.126441	0.231254	0.935935
TCGA-95-7562	87	1	0.764402	0.77081	0.355988	0.0292884	0.469782	0.927555	0.0530649	0.649728	0.224962	0.107086	0.889927	0.235732	0.843111	0.120596	0.917619	0.0745349	0.631592	0.0845453	0.715246	0.551612	0.900566	0.732626	0.871423	0.176342	0.902649	0.0240021	0.0706825	0.910616	0.354235	0.121352	0.679843	0.797147	0.0791529	0.125658	0.840579	0.717581	0.0829131	0.0196149	0.164112	0.0963079	0.914788	0.0453878	0.53732	0.0699055	0.21232	0.448821	0.908423
TCGA-44-A47B	287	0	0.637363	0.802335	0.551734	0.0470214	0.789932	0.886683	0.0640733	0.556282	0.252673	0.127024	0.840728	0.347597	0.844899	0.0996891	0.911071	0.0915889	0.562685	0.0793894	0.471723	0.789366	0.892709	0.643135	0.836554	0.434195	0.559504	0.0722163	0.262611	0.846548	0.254237	0.114605	0.525771	0.809585	0.173989	0.182019	0.445095	0.604221	0.187636	0.0367987	0.127161	0.137651	0.909218	0.0567909	0.328372	0.0648171	0.557391	0.270267	0.930522
TCGA-50-6593	336	1	0.748999	0.838089	0.538903	0.0384502	0.786958	0.901157	0.0592899	0.35066	0.201634	0.207553	0.757682	0.450832	0.833961	0.106389	0.91811	0.0816637	0.581808	0.0973526	0.720821	0.706431	0.904202	0.706522	0.871614	0.289443	0.554292	0.0418974	0.080808	0.852726	0.385379	0.162448	0.420933	0.680266	0.10751	0.174051	0.877531	0.631551	0.153404	0.0347387	0.117272	0.132417	0.884698	0.030441	0.391941	0.0586141	0.478818	0.358982	0.944085
TCGA-64-1679	2488	0	0.617951	0.817195	0.487178	0.0330733	0.797658	0.869903	0.0642409	0.292112	0.226422	0.106285	0.645056	0.431602	0.826668	0.110649	0.749891	0.0672293	0.714366	0.113412	0.692925	0.682954	0.912647	0.669965	0.872209	0.0829753	0.689442	0.00991957	0.0454593	0.908309	0.44024	0.090179	0.548034	0.601456	0.0803086	0.122002	0.84086	0.596363	0.0969173	0.0203404	0.123398	0.121766	0.879055	0.041018	0.37284	0.0836781	0.225294	0.304517	0.918815
TCGA-50-5072	250	1	0.65356	0.796419	0.611048	0.041122	0.760201	0.837697	0.0895499	0.579409	0.296657	0.17882	0.540955	0.540829	0.737884	0.124046	0.897621	0.085753	0.962388	0.112448	0.727704	0.683035	0.90152	0.399994	0.853484	0.232997	0.806718	0.0440422	0.156983	0.860775	0.584764	0.201045	0.536307	0.811399	0.0975731	0.237179	0.774782	0.636318	0.184075	0.0215152	0.245104	0.126339	0.78181	0.0663792	0.714171	0.0837469	0.237817	0.288957	0.908525
TCGA-97-8174	164	1	0.618302	0.746324	0.587992	0.035197	0.690307	0.877576	0.0754591	0.222731	0.275099	0.144251	0.734806	0.325278	0.746625	0.111716	0.819059	0.0909362	0.568276	0.0947373	0.57593	0.82887	0.860472	0.619649	0.839358	0.430225	0.569305	0.562555	0.111786	0.823881	0.329386	0.166579	0.431639	0.657047	0.11446	0.319479	0.844275	0.653557	0.148007	0.0385276	0.12365	0.105461	0.888177	0.0516335	0.434011	0.275717	0.403142	0.253929	0.899532
TCGA-97-A4M5	634	0	0.654044	0.780262	0.488507	0.0379221	0.707506	0.861584	0.0586169	0.447564	0.343359	0.191719	0.571366	0.561903	0.647534	0.0982954	0.921845	0.0568103	0.587539	0.121761	0.826017	0.785373	0.891546	0.436616	0.873774	0.389488	0.744859	0.0703844	0.0567101	0.83819	0.477087	0.143315	0.465664	0.67337	0.0938562	0.326052	0.794923	0.581148	0.114695	0.0327899	0.156585	0.105008	0.876027	0.0383799	0.588696	0.0789737	0.343558	0.439939	0.933389
TCGA-44-8117	385	0	0.481631	0.814521	0.522378	0.0380068	0.666768	0.923975	0.0636308	0.506075	0.299838	0.0929233	0.893723	0.199365	0.776541	0.103519	0.920515	0.0648696	0.491118	0.0407065	0.580155	0.599344	0.893341	0.501732	0.874683	0.127064	0.893855	0.477249	0.39858	0.876107	0.695436	0.315184	0.297809	0.668868	0.451722	0.114311	0.715678	0.7551	0.0641496	0.542614	0.0887767	0.109078	0.924116	0.0415519	0.27736	0.0667218	0.612972	0.171064	0.951157
TCGA-78-7220	807	1	0.72813	0.849839	0.381095	0.0323068	0.817038	0.833591	0.0630063	0.710859	0.369667	0.0875787	0.349996	0.262756	0.854511	0.100856	0.917745	0.0713701	0.846941	0.0949323	0.788536	0.565717	0.922126	0.341532	0.889397	0.275246	0.849258	0.0916996	0.0503865	0.8558	0.664081	0.201897	0.471734	0.830669	0.0547904	0.189358	0.574478	0.612654	0.15443	0.0392596	0.186681	0.113295	0.703249	0.0346441	0.871415	0.0635663	0.15159	0.181483	0.943422
TCGA-69-7760	202	0	0.778443	0.851614	0.727184	0.0479587	0.853475	0.785716	0.0590592	0.591006	0.0952422	0.0847337	0.834393	0.20863	0.695969	0.115027	0.845025	0.056465	0.491487	0.0820044	0.46544	0.475648	0.881375	0.241019	0.848198	0.599627	0.876462	0.054245	0.0495066	0.814508	0.377521	0.071384	0.644184	0.823281	0.0757551	0.145872	0.748104	0.728611	0.139838	0.0283531	0.0905191	0.100084	0.900453	0.0548661	0.187046	0.0712494	0.113526	0.149759	0.904152
TCGA-78-7154	593	1	0.75085	0.828715	0.627322	0.0350759	0.796667	0.766437	0.0537984	0.604794	0.153865	0.106087	0.34651	0.599493	0.808452	0.103957	0.938838	0.070758	0.418377	0.45523	0.800841	0.630982	0.893239	0.675068	0.884364	0.273871	0.893652	0.0462682	0.128418	0.879595	0.495054	0.0945446	0.613421	0.871228	0.0680452	0.155172	0.752487	0.714251	0.140497	0.0160148	0.270796	0.0851889	0.935727	0.0493049	0.832354	0.0543158	0.318322	0.253577	0.930991
TCGA-50-6591	119	1	0.747168	0.91048	0.769033	0.0396728	0.637426	0.455292	0.0560032	0.0450283	0.379801	0.0974511	0.82648	0.746409	0.691093	0.109664	0.933332	0.0597459	0.583703	0.103208	0.647904	0.820149	0.892017	0.29958	0.829707	0.100613	0.859686	0.0991847	0.0611277	0.417622	0.676133	0.114376	0.672672	0.753552	0.0654319	0.0881376	0.541615	0.384957	0.0806027	0.0227946	0.262149	0.103202	0.822245	0.0489954	0.893931	0.0870975	0.0769454	0.281805	0.924664
TCGA-69-8255	129	0	0.478509	0.594571	0.371552	0.0397707	0.680552	0.828258	0.0709685	0.560733	0.351494	0.265819	0.785745	0.385108	0.746405	0.1135	0.869535	0.167437	0.677446	0.108778	0.642511	0.827174	0.858979	0.405598	0.801713	0.405799	0.789184	0.0374462	0.0269715	0.736867	0.398353	0.112726	0.404452	0.726657	0.108628	0.187532	0.524091	0.453647	0.28494	0.0265734	0.127244	0.0996872	0.643046	0.0668932	0.808402	0.080146	0.343608	0.311387	0.923755
TCGA-62-8399	2696	0	0.615002	0.485259	0.277587	0.0337305	0.536908	0.740735	0.055555	0.336567	0.287233	0.124859	0.569466	0.280785	0.799371	0.0962733	0.569942	0.0493516	0.542901	0.0549844	0.670844	0.652874	0.887136	0.599477	0.802665	0.130591	0.850097	0.0461575	0.0507	0.811534	0.454637	0.166024	0.32396	0.78236	0.0674319	0.181306	0.858177	0.501827	0.157694	0.0151683	0.116123	0.107718	0.905017	0.0400869	0.811789	0.0610598	0.28044	0.201865	0.929025
TCGA-MN-A4N5	84	0	0.650873	0.738881	0.530336	0.0432769	0.777676	0.90938	0.0523326	0.490157	0.390692	0.144933	0.855351	0.320242	0.748587	0.0910653	0.923893	0.0976116	0.641884	0.122624	0.695916	0.807109	0.908177	0.65085	0.888758	0.350383	0.667153	0.047823	0.287609	0.888204	0.543629	0.141326	0.55026	0.757284	0.136324	0.170826	0.859743	0.601354	0.178597	0.0217362	0.226101	0.104201	0.921933	0.0529208	0.340861	0.0609457	0.499418	0.269377	0.937092
TCGA-78-7156	976	1	0.807564	0.753836	0.287199	0.0307495	0.838361	0.872456	0.0383216	0.155019	0.106603	0.0518268	0.854649	0.158561	0.797387	0.0897158	0.964996	0.0632321	0.575814	0.0560104	0.361406	0.557343	0.925669	0.642565	0.907498	0.460579	0.278005	0.0200776	0.0644098	0.843985	0.715298	0.0506294	0.592017	0.56846	0.0577524	0.489851	0.858957	0.717362	0.128294	0.0271163	0.0642422	0.0971834	0.958569	0.0393138	0.22456	0.0521546	0.221004	0.141449	0.94576
TCGA-62-A46V	2199	0	0.751393	0.850704	0.712688	0.058707	0.884285	0.891196	0.0780691	0.465731	0.175376	0.143365	0.755869	0.330576	0.762711	0.110567	0.861052	0.0771065	0.697377	0.101742	0.744369	0.596838	0.895041	0.695383	0.868318	0.44476	0.515942	0.0702404	0.49352	0.854703	0.620676	0.0996473	0.665062	0.76539	0.196735	0.345117	0.861722	0.731333	0.121487	0.0356586	0.0933187	0.133043	0.882942	0.0516048	0.30987	0.0699057	0.353768	0.266453	0.90077
TCGA-86-8076	993	0	0.575616	0.623118	0.385095	0.035961	0.59267	0.878203	0.0606161	0.434489	0.221052	0.224351	0.771438	0.423845	0.612408	0.109566	0.672253	0.119743	0.556939	0.0678808	0.635307	0.659685	0.828601	0.649425	0.845923	0.235781	0.621756	0.0126782	0.0374514	0.855489	0.255718	0.158644	0.303615	0.70415	0.0935356	0.212641	0.729395	0.468062	0.200826	0.0233117	0.132661	0.091687	0.894368	0.0502723	0.432862	0.0826961	0.364803	0.31818	0.936259
TCGA-64-5775	62	1	0.858684	0.401948	0.83413	0.0350276	0.876299	0.5976	0.063875	0.667611	0.549499	0.432186	0.59288	0.303574	0.638296	0.0950328	0.931256	0.0438376	0.748076	0.11002	0.76347	0.879682	0.90532	0.674649	0.867824	0.063428	0.896984	0.0960268	0.0446831	0.837703	0.346415	0.411265	0.461113	0.512942	0.215531	0.490117	0.297123	0.399749	0.0829345	0.0234239	0.406023	0.109503	0.2529	0.0452933	0.241075	0.0650088	0.742078	0.631713	0.916709
TCGA-78-7149	3940	0	0.806541	0.476182	0.413882	0.0442592	0.726566	0.887341	0.0753793	0.157986	0.236674	0.113682	0.845212	0.248456	0.830753	0.0992425	0.878653	0.0617119	0.545892	0.0936042	0.44011	0.443224	0.913264	0.499818	0.894207	0.49321	0.356348	0.0439668	0.0562639	0.851703	0.325633	0.0938765	0.586495	0.624489	0.0906939	0.586655	0.828662	0.634161	0.14072	0.0361862	0.0871115	0.109611	0.936648	0.0437054	0.287316	0.0807374	0.275969	0.165377	0.960041
TCGA-55-8090	598	1	0.508089	0.817755	0.565706	0.0231432	0.730177	0.901503	0.0562595	0.413406	0.261183	0.089784	0.83133	0.352856	0.853625	0.107883	0.940236	0.0397873	0.549157	0.11905	0.518612	0.852007	0.884137	0.64912	0.885085	0.540158	0.527744	0.475466	0.113013	0.872678	0.434724	0.452597	0.423303	0.760112	0.0969622	0.103025	0.831184	0.707497	0.0739305	0.0540296	0.120787	0.0933914	0.901641	0.0311765	0.282575	0.0561696	0.398407	0.239156	0.938794
TCGA-55-6972	1632	1	0.747759	0.908647	0.68594	0.0455904	0.696432	0.87928	0.0730645	0.524104	0.064195	0.0718064	0.856331	0.131092	0.774593	0.0952687	0.919308	0.0361389	0.585438	0.0630012	0.313302	0.54351	0.888849	0.44173	0.870142	0.449345	0.195423	0.0101751	0.0411389	0.887414	0.614077	0.0518417	0.543143	0.753958	0.0638056	0.18921	0.744822	0.673988	0.0637011	0.022578	0.0828237	0.100204	0.941299	0.0389561	0.236014	0.0517187	0.439845	0.163684	0.902776
TCGA-55-8512	607	1	0.764656	0.796712	0.509322	0.0301605	0.669585	0.902963	0.0584501	0.254099	0.23441	0.139148	0.707289	0.314151	0.810594	0.103692	0.93774	0.0644726	0.964695	0.0672981	0.491775	0.725431	0.897594	0.47268	0.868311	0.389582	0.519011	0.0552203	0.0164465	0.889535	0.383876	0.0938555	0.548754	0.680184	0.0920198	0.185588	0.864876	0.577016	0.08428	0.0314875	0.0971333	0.103306	0.930221	0.037061	0.399619	0.0685028	0.287362	0.356483	0.917146
TCGA-78-7537	1622	1	0.838174	0.90028	0.600876	0.0384273	0.863376	0.933241	0.0649959	0.234156	0.249708	0.42754	0.881117	0.285249	0.765003	0.126429	0.951753	0.082465	0.995403	0.084573	0.647478	0.529705	0.934726	0.525948	0.888341	0.575294	0.436966	0.0341967	0.0876008	0.93152	0.660028	0.266328	0.480303	0.931043	0.142946	0.37634	0.878885	0.617835	0.134838	0.0192075	0.098191	0.134754	0.923542	0.0516369	0.285088	0.0784442	0.561886	0.241779	0.93785
TCGA-55-6969	1239	0	0.600557	0.677334	0.602756	0.0378708	0.557516	0.839975	0.0762162	0.568557	0.307557	0.289332	0.738767	0.474168	0.68945	0.113153	0.876827	0.129717	0.660932	0.180125	0.676092	0.632362	0.834162	0.557487	0.852207	0.336368	0.689721	0.0361196	0.0990935	0.774427	0.403454	0.234051	0.498441	0.86404	0.124923	0.382528	0.697217	0.476518	0.137803	0.0419184	0.23078	0.160731	0.843805	0.0532661	0.47047	0.071595	0.449228	0.405011	0.90474
TCGA-78-7633	1528	1	0.787926	0.900188	0.469013	0.0308975	0.787788	0.829075	0.049703	0.622631	0.0695698	0.0661048	0.835319	0.312328	0.852066	0.105502	0.932144	0.0370111	0.612295	0.0560777	0.526125	0.844185	0.910528	0.444837	0.873541	0.577184	0.289881	0.0305004	0.0397845	0.847991	0.433189	0.0569085	0.54584	0.544327	0.056262	0.106591	0.8422	0.678844	0.0663592	0.0269817	0.307769	0.0711886	0.933092	0.0339869	0.223143	0.0622353	0.161309	0.146723	0.918764
TCGA-95-A4VK	651	0	0.636024	0.774774	0.58819	0.0379597	0.740453	0.879861	0.0837074	0.619006	0.226435	0.20556	0.723165	0.446553	0.743037	0.113618	0.872777	0.104371	0.970038	0.0832193	0.858899	0.530026	0.871575	0.386179	0.856316	0.416175	0.894634	0.0391653	0.0636607	0.784534	0.508578	0.137214	0.56835	0.78378	0.108981	0.164432	0.715119	0.537079	0.162461	0.0281696	0.101218	0.105	0.872598	0.0470594	0.756868	0.0573782	0.201088	0.225735	0.904622
TCGA-50-5931	434	1	0.737233	0.710647	0.581469	0.0416171	0.698293	0.809995	0.0681441	0.62565	0.123022	0.0837134	0.724879	0.788457	0.74403	0.124984	0.90308	0.0553893	0.736804	0.244097	0.616025	0.416717	0.925378	0.266965	0.894979	0.182183	0.766602	0.100204	0.0547951	0.746342	0.334602	0.205219	0.638768	0.622268	0.0614735	0.0765064	0.70873	0.679808	0.0653495	0.0220823	0.311719	0.139302	0.758545	0.046271	0.854897	0.0605182	0.107342	0.201025	0.926925
TCGA-MP-A4TI	429	1	0.528362	0.643083	0.516753	0.0289758	0.818183	0.902845	0.0508081	0.522341	0.362595	0.205421	0.691755	0.662351	0.681826	0.0825546	0.894741	0.122787	0.653954	0.245222	0.793935	0.886261	0.892001	0.577912	0.86012	0.229803	0.877879	0.0376759	0.0410972	0.903417	0.321332	0.145536	0.402743	0.781594	0.114684	0.265302	0.782016	0.513152	0.186117	0.0190732	0.186052	0.104223	0.802926	0.0284698	0.519764	0.355803	0.384203	0.431785	0.917139
TCGA-55-8616	48	0	0.696821	0.634233	0.361726	0.0403701	0.511187	0.831279	0.0537405	0.335862	0.343421	0.142151	0.841547	0.386802	0.822364	0.105092	0.966651	0.0656278	0.570023	0.0649108	0.763672	0.629354	0.88091	0.701213	0.877291	0.312754	0.690386	0.0341252	0.0450424	0.875864	0.345737	0.109901	0.420265	0.489723	0.123284	0.1672	0.862523	0.458497	0.137365	0.0314015	0.107125	0.102605	0.884671	0.0343924	0.384864	0.0743699	0.572671	0.331686	0.916017
TCGA-86-A456	896	0	0.626577	0.741964	0.46843	0.0477604	0.701402	0.887322	0.0790203	0.369041	0.178254	0.202914	0.830357	0.372406	0.769943	0.114138	0.898097	0.110865	0.584918	0.143466	0.651416	0.757183	0.894762	0.605473	0.853968	0.464223	0.853724	0.050127	0.230825	0.842125	0.380039	0.16255	0.454199	0.745842	0.347697	0.405756	0.80027	0.578279	0.178616	0.0318315	0.116624	0.127839	0.888565	0.0655497	0.433369	0.0792311	0.330275	0.341362	0.909506
TCGA-62-A46S	1653	1	0.718781	0.827901	0.621189	0.0541815	0.775998	0.858448	0.0911025	0.530982	0.268722	0.203457	0.537776	0.541663	0.758294	0.111515	0.895368	0.0877324	0.607189	0.0869542	0.57022	0.82428	0.894125	0.40042	0.848318	0.498377	0.847748	0.0456502	0.0853241	0.853892	0.287943	0.107796	0.61243	0.790228	0.0839806	0.540014	0.740868	0.614618	0.151892	0.0391811	0.326506	0.108834	0.869053	0.0567478	0.377454	0.0879629	0.351292	0.259913	0.924407
TCGA-62-A46R	1725	1	0.626561	0.705272	0.446208	0.0475947	0.784213	0.896865	0.0641819	0.523374	0.339765	0.191138	0.855429	0.539605	0.765124	0.112737	0.88256	0.0996917	0.65795	0.141762	0.866524	0.822767	0.903845	0.767506	0.881633	0.182877	0.899602	0.0459474	0.115844	0.845376	0.466138	0.248019	0.349037	0.879982	0.359965	0.612422	0.84456	0.616101	0.147471	0.0827686	0.165732	0.124693	0.781671	0.0589505	0.55308	0.0741561	0.508557	0.61677	0.938985
TCGA-64-5778	1305	0	0.678536	0.759488	0.490392	0.0261278	0.769507	0.883139	0.0548519	0.605486	0.19562	0.186836	0.848503	0.325782	0.756212	0.087905	0.87488	0.0967797	0.753697	0.0693325	0.743686	0.745036	0.906985	0.644235	0.90883	0.32157	0.694885	0.0615129	0.0504112	0.843471	0.426087	0.095641	0.46084	0.676578	0.0704553	0.177577	0.812007	0.563907	0.17885	0.0188713	0.0869008	0.0991028	0.901183	0.0255348	0.382919	0.0563741	0.511368	0.275741	0.939752
TCGA-50-6597	1268	1	0.663471	0.807718	0.60889	0.0472957	0.805413	0.895343	0.068155	0.491285	0.146199	0.156901	0.802785	0.420266	0.819997	0.0910877	0.721044	0.0951811	0.573107	0.0704224	0.768523	0.713957	0.900195	0.732632	0.893813	0.497875	0.881181	0.0398068	0.184012	0.869804	0.426489	0.106855	0.593098	0.514043	0.084739	0.171946	0.793525	0.605104	0.128365	0.027632	0.104455	0.118915	0.898134	0.0425386	0.34065	0.0632111	0.19518	0.246464	0.928655
TCGA-86-7713	1157	0	0.790485	0.843014	0.354995	0.0379448	0.785642	0.815156	0.085387	0.535859	0.39373	0.1292	0.530417	0.16012	0.850471	0.117915	0.809277	0.0736583	0.734405	0.0703384	0.475183	0.764438	0.935305	0.64882	0.899722	0.382058	0.819849	0.059145	0.0599886	0.871492	0.341247	0.217414	0.658731	0.647981	0.0826707	0.156661	0.77659	0.637742	0.15135	0.0276306	0.109614	0.132823	0.916321	0.0430545	0.201222	0.0759773	0.313489	0.246152	0.950393
TCGA-53-7813	424	0	0.606108	0.736433	0.344437	0.0496001	0.526088	0.857917	0.0585705	0.200182	0.223618	0.200644	0.813926	0.421196	0.733177	0.0986721	0.663852	0.0992235	0.545775	0.0699207	0.468852	0.557407	0.853674	0.57576	0.812775	0.367887	0.846256	0.050479	0.0472627	0.775168	0.21398	0.145228	0.416872	0.700677	0.0937316	0.234403	0.727694	0.48364	0.188099	0.0365096	0.106513	0.0905145	0.852655	0.0503062	0.428104	0.196698	0.24051	0.202143	0.942663
TCGA-97-8172	545	0	0.621142	0.781412	0.387663	0.0595448	0.685848	0.8781	0.0735041	0.425842	0.283625	0.210584	0.78791	0.358759	0.736996	0.114717	0.900935	0.0772531	0.557659	0.0861817	0.621219	0.559289	0.872616	0.672947	0.838674	0.431503	0.862502	0.22368	0.0693448	0.828198	0.412222	0.108544	0.513056	0.736929	0.0867532	0.158395	0.52561	0.532569	0.148753	0.0291379	0.136713	0.1033	0.891362	0.0541462	0.538586	0.0743962	0.456593	0.249761	0.930097
TCGA-71-6725	256	0	0.433379	0.654337	0.317509	0.0518202	0.478393	0.897286	0.0580823	0.306101	0.157002	0.130934	0.63409	0.316351	0.83476	0.111948	0.916103	0.0389479	0.603562	0.0829601	0.458697	0.368595	0.876963	0.588487	0.872088	0.086206	0.849315	0.0401852	0.0690677	0.854715	0.228025	0.0923534	0.201402	0.735281	0.357509	0.114433	0.698351	0.527818	0.112611	0.0308514	0.0960149	0.108564	0.860799	0.0527411	0.212702	0.0706909	0.375135	0.200617	0.921928
TCGA-67-6217	422	0	0.651322	0.819022	0.456115	0.0408592	0.700596	0.865885	0.0867588	0.314563	0.19055	0.22126	0.829897	0.503994	0.691118	0.118645	0.89741	0.114651	0.580649	0.10248	0.658058	0.744919	0.908268	0.607347	0.872889	0.266315	0.553216	0.011073	0.109153	0.858562	0.34032	0.133835	0.382442	0.621037	0.192561	0.163771	0.770238	0.503546	0.143808	0.0233139	0.0968466	0.117097	0.903614	0.0639113	0.431963	0.0438549	0.282762	0.292278	0.919575
TCGA-NJ-A4YF	2161	0	0.617934	0.816779	0.654512	0.0553902	0.805912	0.88356	0.0648939	0.138617	0.224791	0.118246	0.816774	0.264568	0.849322	0.103081	0.883145	0.0616178	0.598332	0.0891822	0.533049	0.45546	0.888127	0.566469	0.861658	0.563586	0.755422	0.0707209	0.0998732	0.85888	0.231409	0.0725969	0.572153	0.802549	0.0968885	0.156488	0.777511	0.602831	0.168755	0.0408887	0.0737368	0.132093	0.539067	0.0460317	0.280858	0.0954019	0.541927	0.199487	0.878283
TCGA-62-A471	1246	0	0.664667	0.793836	0.541706	0.0700992	0.783369	0.842977	0.0744367	0.644251	0.375667	0.160909	0.438652	0.465069	0.768988	0.1118	0.918403	0.102113	0.638666	0.121736	0.829462	0.86305	0.903834	0.396559	0.823413	0.176971	0.857643	0.0484734	0.0883095	0.841683	0.520028	0.362842	0.559237	0.829209	0.109926	0.200771	0.812275	0.62619	0.11516	0.0253656	0.248327	0.130837	0.686961	0.059604	0.771777	0.0868292	0.253541	0.293335	0.91433
TCGA-99-7458	747	0	0.624993	0.735246	0.47632	0.0374965	0.709512	0.900041	0.0574867	0.428314	0.198259	0.399073	0.824413	0.388411	0.716449	0.111622	0.885509	0.120769	0.617537	0.097115	0.654013	0.856159	0.900579	0.62843	0.891402	0.402912	0.54016	0.0498725	0.104399	0.848298	0.460803	0.157986	0.47297	0.79664	0.314231	0.259906	0.848199	0.619404	0.184934	0.0663677	0.187033	0.129627	0.882967	0.0522576	0.529253	0.0673086	0.237032	0.390691	0.928482
TCGA-55-7281	872	0	0.697109	0.800248	0.384531	0.0445027	0.744792	0.812034	0.0500212	0.202957	0.305734	0.0900019	0.755508	0.396228	0.800568	0.0969704	0.936528	0.0569997	0.544765	0.075162	0.573713	0.667664	0.910618	0.689452	0.877859	0.15332	0.460463	0.0378052	0.0767946	0.861137	0.399792	0.0674105	0.326611	0.625953	0.106263	0.148643	0.874897	0.557754	0.103762	0.0295687	0.088569	0.11955	0.889021	0.0442208	0.324116	0.0631433	0.512077	0.278822	0.937417
TCGA-50-5051	478	1	0.720548	0.829508	0.662379	0.0307709	0.716467	0.860921	0.0737821	0.664013	0.440578	0.136129	0.635691	0.321472	0.839488	0.102264	0.803948	0.0565702	0.597553	0.0835828	0.399445	0.596536	0.909792	0.56395	0.827366	0.526366	0.610955	0.0279184	0.130784	0.863777	0.43514	0.39597	0.551768	0.789773	0.102991	0.632348	0.66876	0.681395	0.101585	0.0125854	0.0884242	0.0938827	0.915831	0.0401582	0.293186	0.151473	0.569749	0.267678	0.934331
TCGA-97-A4LX	614	0	0.491601	0.645989	0.458419	0.0399388	0.64582	0.878604	0.0648997	0.473623	0.257971	0.207546	0.820506	0.546735	0.637162	0.103643	0.893407	0.140661	0.676315	0.225402	0.778679	0.782268	0.879401	0.675249	0.875363	0.32289	0.873382	0.0137746	0.0628758	0.859764	0.400456	0.132731	0.411073	0.735096	0.192279	0.251517	0.800472	0.478599	0.223953	0.0286128	0.138452	0.114945	0.87259	0.0533471	0.558963	0.064814	0.27288	0.463858	0.921614
TCGA-55-8620	375	1	0.732019	0.835777	0.625526	0.0255984	0.585689	0.798327	0.0459528	0.725292	0.193691	0.177712	0.713299	0.282513	0.843284	0.0823606	0.938042	0.0800597	0.837991	0.147912	0.805659	0.831888	0.88161	0.500864	0.855623	0.208409	0.875208	0.0458706	0.0389926	0.80764	0.266539	0.111581	0.568989	0.808839	0.0959678	0.116983	0.787804	0.559939	0.162157	0.0253691	0.104198	0.0859351	0.869907	0.0373331	0.600069	0.0490164	0.220151	0.538222	0.916857
TCGA-49-6742	488	1	0.707829	0.837014	0.515463	0.0393247	0.774617	0.747038	0.0458407	0.657668	0.235174	0.0916395	0.3748	0.27922	0.809928	0.109504	0.919368	0.0414144	0.645335	0.0746875	0.751711	0.830252	0.895424	0.345467	0.877844	0.254379	0.826295	0.0187073	0.0447305	0.811456	0.611491	0.13803	0.549483	0.784594	0.0853516	0.161116	0.568105	0.666546	0.0743746	0.026392	0.218174	0.0996667	0.428485	0.0425282	0.799947	0.0499597	0.148746	0.223838	0.92426
TCGA-44-7670	882	0	0.750426	0.84854	0.707579	0.040424	0.731984	0.807205	0.0531578	0.132096	0.236624	0.104767	0.608507	0.672449	0.819925	0.107967	0.924481	0.0733554	0.848443	0.25754	0.720381	0.767221	0.90809	0.619403	0.89688	0.332348	0.83855	0.0303002	0.485285	0.875451	0.460176	0.0894533	0.542896	0.690695	0.063591	0.128807	0.797484	0.362681	0.11741	0.0293946	0.217924	0.119815	0.888379	0.0353441	0.863976	0.0691307	0.164659	0.0896195	0.93443
TCGA-73-7498	1189	0	0.717884	0.839828	0.359173	0.0363046	0.613461	0.876153	0.0556754	0.225463	0.175065	0.139575	0.857704	0.240719	0.798545	0.10947	0.929436	0.0707374	0.583009	0.0747795	0.553078	0.896175	0.89478	0.462786	0.883086	0.322458	0.44295	0.0446834	0.0457018	0.848097	0.320137	0.0945815	0.416806	0.833605	0.104146	0.133164	0.807455	0.661043	0.109729	0.0326496	0.148386	0.125877	0.92903	0.0354175	0.319114	0.0485701	0.45054	0.259272	0.944786
TCGA-05-5423	151	0	0.801096	0.864014	0.49952	0.0386804	0.849429	0.913512	0.0628115	0.189063	0.218081	0.157367	0.878449	0.366856	0.836193	0.110156	0.873457	0.0791041	0.698741	0.100148	0.597123	0.824936	0.920754	0.748392	0.924685	0.287667	0.875336	0.0486591	0.0724162	0.840847	0.498582	0.115912	0.590662	0.618144	0.0883489	0.295726	0.864783	0.695012	0.159626	0.0217988	0.117728	0.137059	0.888011	0.0484505	0.304358	0.0712546	0.217317	0.343491	0.944299
TCGA-86-A4D0	116	1	0.673618	0.90341	0.598766	0.0369087	0.749394	0.912019	0.0782543	0.603672	0.573292	0.148657	0.804632	0.521977	0.838371	0.117947	0.92513	0.0927264	0.624088	0.283991	0.556669	0.630313	0.899365	0.503216	0.855354	0.563187	0.892044	0.0898731	0.0799757	0.859745	0.245997	0.244685	0.617956	0.843462	0.064634	0.655799	0.800302	0.653621	0.136989	0.0242015	0.0898167	0.109971	0.911327	0.0514239	0.436714	0.0694611	0.661543	0.21458	0.921652
TCGA-MP-A4T7	167	1	0.743158	0.799121	0.515637	0.0339027	0.667357	0.784162	0.0512644	0.514286	0.141923	0.121161	0.598743	0.35609	0.795633	0.0769744	0.907532	0.0457089	0.534926	0.0795105	0.788787	0.685944	0.885773	0.357147	0.863731	0.217316	0.743009	0.042206	0.0388919	0.860103	0.536953	0.1035	0.479335	0.720826	0.0900314	0.0936047	0.783007	0.671442	0.0508073	0.0140231	0.124917	0.108281	0.827677	0.0402872	0.73452	0.0523559	0.314443	0.316687	0.926113
TCGA-05-4433	730	0	0.516608	0.531368	0.368157	0.0521893	0.807201	0.858005	0.0795985	0.501273	0.23108	0.187258	0.511617	0.309877	0.76257	0.0924112	0.91221	0.112478	0.58708	0.105193	0.612152	0.812343	0.89646	0.464664	0.864319	0.33453	0.829625	0.0416649	0.0422436	0.832364	0.310779	0.148708	0.4935	0.777206	0.108309	0.300148	0.805972	0.550238	0.113348	0.0280373	0.151101	0.105306	0.869915	0.0594874	0.78828	0.0630154	0.254193	0.471053	0.924758
TCGA-86-8359	444	1	0.720601	0.796288	0.578615	0.0349961	0.785261	0.801784	0.065486	0.62197	0.270927	0.116631	0.520579	0.501132	0.803574	0.113001	0.900498	0.0863422	0.637806	0.089143	0.811657	0.85235	0.897372	0.787954	0.882863	0.182099	0.895706	0.0283314	0.0386417	0.790727	0.263127	0.139325	0.550833	0.830616	0.0783937	0.125247	0.866627	0.549911	0.140204	0.0203609	0.102328	0.0901863	0.766937	0.0431967	0.499993	0.0596928	0.41826	0.354066	0.92639
TCGA-78-7540	1197	1	0.805992	0.752102	0.361071	0.0214431	0.733054	0.880814	0.0534547	0.463141	0.202862	0.0865864	0.4161	0.234766	0.84361	0.115188	0.928024	0.0559085	0.634044	0.0597721	0.72896	0.591896	0.90491	0.580585	0.858046	0.225099	0.753196	0.0303117	0.0555596	0.844981	0.376996	0.154918	0.439636	0.791286	0.172745	0.481805	0.86119	0.741587	0.0634874	0.0207191	0.0717218	0.0996788	0.916265	0.0336448	0.757719	0.0809383	0.250118	0.448265	0.936852
TCGA-86-8279	949	0	0.629945	0.868589	0.269214	0.0469933	0.62501	0.809799	0.0673198	0.10874	0.167847	0.107841	0.783397	0.348865	0.820961	0.127842	0.891406	0.0619721	0.421896	0.0908944	0.511313	0.484588	0.866233	0.726311	0.853649	0.174724	0.528133	0.0505077	0.0632633	0.818413	0.342903	0.0692862	0.530099	0.387484	0.101638	0.124649	0.714842	0.519638	0.161377	0.0337094	0.0895995	0.134082	0.749538	0.06761	0.236701	0.0850432	0.194028	0.156359	0.662749
TCGA-91-6835	79	0	0.490799	0.647821	0.522066	0.0648046	0.686336	0.90611	0.0781894	0.597251	0.343788	0.327452	0.865918	0.487021	0.676902	0.111817	0.831224	0.131509	0.611405	0.150924	0.733801	0.857752	0.87114	0.636694	0.873675	0.318383	0.891066	0.0474277	0.121825	0.879466	0.40962	0.133526	0.426761	0.768178	0.154562	0.305249	0.818242	0.437558	0.270539	0.0282727	0.1325	0.127719	0.895712	0.0646789	0.648088	0.0755036	0.301937	0.397627	0.914951
TCGA-64-5781	1559	0	0.559537	0.732401	0.576085	0.0365315	0.775655	0.906282	0.0770236	0.600389	0.448178	0.166069	0.808697	0.431233	0.712584	0.103017	0.886237	0.175328	0.600198	0.281589	0.818573	0.801207	0.88265	0.748597	0.902309	0.19986	0.632317	0.025337	0.0766718	0.842423	0.483865	0.336314	0.424854	0.788602	0.141906	0.18938	0.790623	0.528846	0.200092	0.0191572	0.133887	0.100906	0.87277	0.0417261	0.661177	0.0645119	0.528858	0.629067	0.928562
TCGA-86-7711	1046	1	0.794737	0.780675	0.384487	0.0376228	0.833967	0.867397	0.0668432	0.423464	0.287932	0.137291	0.791545	0.620558	0.564721	0.121289	0.750268	0.0808043	0.642878	0.0916559	0.830914	0.595523	0.925944	0.571037	0.893431	0.231628	0.87603	0.0358127	0.0505779	0.863672	0.385795	0.155056	0.4526	0.670172	0.0907013	0.154144	0.701469	0.556257	0.119314	0.0239877	0.108671	0.0933519	0.833084	0.0407313	0.580473	0.0783624	0.527155	0.335191	0.933408
TCGA-78-7152	1215	1	0.674067	0.774654	0.309489	0.0366728	0.734127	0.908652	0.061723	0.667601	0.296066	0.18005	0.889985	0.300313	0.71613	0.108233	0.868109	0.0897909	0.591498	0.0862303	0.554592	0.777512	0.924916	0.62241	0.874518	0.200659	0.459523	0.0928401	0.0822693	0.858943	0.178747	0.170087	0.447726	0.859113	0.146766	0.482319	0.824357	0.599637	0.138564	0.0290725	0.112591	0.101746	0.921277	0.0441028	0.406415	0.0767524	0.399305	0.290051	0.922477
TCGA-38-4631	354	1	0.743388	0.788872	0.523061	0.0370922	0.782806	0.862988	0.0809009	0.427777	0.382362	0.193508	0.801506	0.725631	0.823562	0.119517	0.88711	0.0552277	0.633899	0.123507	0.433479	0.716725	0.906661	0.327008	0.836548	0.4359	0.863117	0.0499467	0.0998827	0.8028	0.514373	0.105331	0.612111	0.789473	0.0952973	0.172278	0.498024	0.369811	0.117222	0.0315985	0.149167	0.18116	0.861396	0.0622102	0.6476	0.0663979	0.143685	0.239473	0.876068
[truncated: 727 more columns]
