# Supplementary material for: Molecular subtypes based on DNA promoter methylation predict prognosis in lung adenocarcinoma patients
Source: Aging (Albany NY). 2020 Nov 24;12(23):23917–30. doi: 10.18632/aging.104062 (PMC7762488; doi:10.18632/aging.104062)
Supplement: Supplementary Table 3 [file aging-12-104062-s003.xlsx]

## Sheet: Sheet1
Supplementary Table 3. The available expression profile of 774 sites in 335 training set
id	TCGA-44-2661-11A-01R-1758-07	TCGA-91-6836-11A-01R-1858-07	TCGA-55-6986-11A-01R-1949-07	TCGA-49-6743-11A-01R-1858-07	TCGA-91-6849-11A-01R-1949-07	TCGA-55-6984-11A-01R-1949-07	TCGA-50-5932-11A-01R-1755-07	TCGA-50-5933-11A-01R-1755-07	TCGA-50-6595-11A-01R-1858-07	TCGA-91-6835-11A-01R-1858-07	TCGA-49-6744-11A-01R-1858-07	TCGA-55-6981-11A-01R-1949-07	TCGA-91-6829-11A-01R-1858-07	TCGA-44-5645-11A-01R-1628-07	TCGA-55-6983-11A-01R-1949-07	TCGA-49-4490-11A-01R-1858-07	TCGA-44-6777-11A-01R-1858-07	TCGA-44-6146-11A-01R-1858-07	TCGA-44-6147-11A-01R-1858-07	TCGA-91-6831-11A-02R-1858-07	TCGA-55-6972-11A-01R-1949-07	TCGA-38-4626-11A-01R-1758-07	TCGA-44-6148-11A-01R-1858-07	TCGA-55-6970-11A-01R-1949-07	TCGA-44-6144-11A-01R-1755-07	TCGA-55-6982-11A-01R-1949-07	TCGA-44-3398-11B-01R-1758-07	TCGA-49-4512-11A-01R-1858-07	TCGA-44-6145-11A-01R-1858-07	TCGA-91-6828-11A-01R-1858-07	TCGA-50-5936-11A-01R-1628-07	TCGA-73-4676-11A-01R-1755-07	TCGA-44-3396-11A-01R-1758-07	TCGA-38-4627-11A-01R-1758-07	TCGA-44-2668-11A-01R-1758-07	TCGA-55-6969-11A-01R-1949-07	TCGA-44-6776-11A-01R-1858-07	TCGA-50-5930-11A-01R-1755-07	TCGA-44-6778-11A-01R-1858-07	TCGA-55-6980-11A-01R-1949-07	TCGA-50-5935-11A-01R-1858-07	TCGA-50-5931-11A-01R-1858-07	TCGA-38-4625-11A-01R-1758-07	TCGA-55-6979-11A-01R-1949-07	TCGA-91-6847-11A-01R-1949-07	TCGA-55-6978-11A-01R-1949-07	TCGA-50-5939-11A-01R-1628-07	TCGA-55-6968-11A-01R-1949-07	TCGA-55-6971-11A-01R-1949-07
C11orf16	0.363384	1.29911	15.2631	0.119674	8.18336	3.95835	0.855285	1.73996	1.53307	16.1859	0.377016	2.68357	2.37185	2.04343	2.40886	0.62689	0.904338	0.164266	0.480947	0.0554141	1.4306	2.84767	6.65016	0.569606	0.0587642	5.29177	2.52066	1.83351	1.4089	5.33424	0.355713	0.335062	1.99604	0.195987	0.0358882	0.781797	1.6616	0.0233134	0.682521	2.44043	2.67596	0.0794265	1.25522	0.682411	5.70784	7.11653	0.145697	0.696654	0.0537072
GUF1	3.81078	4.96535	5.80063	3.38774	4.1677	4.60961	4.15352	3.3086	4.98358	6.20275	5.36757	4.7401	5.16684	4.07812	5.20222	3.0798	3.47942	4.30444	3.12569	4.63818	4.04043	3.28494	5.27433	5.1173	4.35678	5.23059	4.26758	3.64464	3.51562	4.83662	4.0947	2.90544	3.8972	3.08732	3.26642	4.53721	5.31436	3.98455	4.13386	4.18258	4.69885	3.26092	3.06126	4.68165	4.437	4.75494	3.69744	4.14436	4.82224
IL20	0.012595	0.0648394	0.0490215	0.0905003	0.0426121	0.0196288	0.0666997	0.0146942	0	1.22486	0	0.0528358	0	0.0409595	0.0921286	0.410341	0.0200605	0	0.0275912	0.0307306	0	0.0553032	0.0365947	0.0220383	0	0.0215781	0.627079	0.138654	0.0176238	0.142277	0	0.0412917	0.296785	0.0283532	0.0199022	0	0.0197456	0.0193931	0.0493696	0	0.0203286	0.0188773	0.0091592	0	0.0213395	0.0220478	0.0519416	0	0
LAMC1	39.1556	19.1297	23.0362	32.3037	28.3822	19.1206	41.6366	36.8698	21.7613	27.7976	52.211	29.7647	13.0169	22.4355	18.591	16.4844	24.0978	44.6941	36.1144	25.7387	23.2824	9.23887	35.0685	21.0672	25.3143	27.8838	28.2652	12.5432	19.2619	22.3452	31.9558	17.9349	34.795	18.9219	26.7273	19.8244	25.6004	28.0934	23.1737	25.6889	39.2862	21.1668	14.5488	19.3281	20.7651	23.3656	36.3648	15.9882	27.883
GFI1B	0.302367	0.212263	0.209516	0.0691293	0.197622	0.117807	0.145569	0.160347	0.57106	0.101257	0.100656	0.100898	0.112331	0.625745	0.125666	0.102615	0.164179	0.172049	0.225812	0.318573	0.100862	0.191103	0.499163	0.565146	0.0355613	0.317879	0.326104	0.0972661	0.163469	0.19407	0.0880613	0.292881	0.196942	0.355807	0.141166	0.144338	0.161602	0.179879	0.143662	0.376448	0.188556	0.0823975	0.269858	0.0288114	0.15136	0.30074	0.17004	0.0804839	0.0975032
AMY2A	0	0	0.033727	0.029887	0	0	0.0367118	0.0242632	0.00838944	0.015322	0.0152309	0.0218108	0.0141646	0.0112721	0.0570465	0	0.0165621	0	0	0.0761141	0	0	0.0100709	0	0	0.017815	0	0.0163534	0	0	0	0	0.00662237	0	0	0.0728026	0	0	0	0.0219089	0.117484	0	0.0151238	0	0	0	0	0	0
FSBP	0	0	0	0	0	0	0	0	0	0	0	0	0	0	0	0	0	0	0.00679375	0	0	0	0	0	0	0	0	0	0	0.00875816	0.00883135	0	0	0	0	0	0	0	0	0	0	0	0	0	0	0	0	0	0
CLEC7A	6.61331	11.9871	5.53972	7.32423	6.27094	7.42164	5.28828	6.99567	6.58208	3.28984	5.49188	14.1382	21.0456	6.07114	11.3356	6.31751	6.45201	7.06789	8.22402	10.0447	8.16656	25.2293	6.04004	12.4454	9.0493	10.7975	5.86663	7.51151	9.82069	5.50053	8.21579	6.87192	7.10358	10.1636	11.2578	13.6036	4.99197	4.78682	19.7375	7.46312	4.60718	5.76788	11.1257	16.5591	4.36542	9.8947	6.84422	11.9476	10.4192
CAHM	0.220271	0.604782	0.542975	0.379859	0.596189	0.497763	0.34995	0.385477	0.533141	0.486849	0.387164	0.231009	0.780129	0.835723	0.362525	0.657836	0.280668	0.514712	0.337777	0.268721	0.202061	0.145078	0.298666	0.501052	0.541437	0.679276	0.479801	0.381055	0.184932	0.279929	0.40772	0.613823	0.322648	0.570244	0.0870168	0.539763	0.414393	0.542661	0.431709	0.556916	0.355524	0.39617	0.49657	0.230877	0.410523	0.308473	0.18168	0.737085	0.437546
CD247	2.53431	3.53454	1.98675	1.51165	3.12844	1.70414	3.96414	1.28429	6.81293	1.65086	1.71271	2.781	1.14629	4.55044	2.36196	4.17751	4.71444	2.97242	3.0492	2.47101	6.32812	1.79736	3.40689	5.92404	3.20271	4.56817	8.85669	2.93921	2.71784	1.89981	4.86932	3.52071	3.14699	3.32064	1.79746	2.87731	2.4928	1.86071	3.3305	3.65939	3.46661	2.85248	1.16698	2.65633	1.19366	6.49185	0.733084	3.35617	2.15194
DOCK8	7.29945	10.494	4.19731	5.35609	4.79338	6.12757	7.88842	7.39853	6.53838	3.81236	8.73079	8.46617	16.0967	6.57015	10.6174	2.64537	7.9636	7.60447	4.96373	6.59579	6.89828	7.83256	8.00279	9.32249	6.39252	9.70673	8.62918	3.774	7.82977	6.96307	8.63794	4.10738	10.5039	4.00168	10.7912	11.3479	4.4715	6.96231	7.26066	6.88425	6.40611	3.50444	5.63936	10.6584	5.33218	7.98557	10.1347	10.2317	7.81945
SERPINA13P	0	0	0	0	0	0	0	0	0	0	0	0	0	0	0	0	0	0	0	0	0	0	0	0	0	0	0	0	0	0	0	0	0	0	0	0	0	0	0	0	0	0	0	0	0	0	0	0	0
C6orf201	0.0356788	0.153063	0.424316	0	0.251481	0.162179	0.167952	0.145689	0.225486	0.665913	0.139359	0.236981	0.113402	0.128921	0.184861	0.0322891	0.0189423	0.0496257	0.0781599	0.0435266	0.0981876	0.0783309	0.357067	0.0832396	0.0615439	0.254692	0.198917	0.0841663	0.141453	0.411436	0	0.0194951	0.0719541	0.00669319	0.0187929	0.135307	0.167805	0.0366243	0.163162	0.187932	0.143966	0	0.0821624	0.0872588	0.251875	0.291465	0.0490464	0.0895428	0.0421858
MAPK8IP2	0.558543	0.786288	0.679083	0.764223	0.71288	0.544695	0.38376	0.589205	0.793325	1.14826	0.538877	0.961086	0.487483	0.540211	0.422014	0.240632	0.825689	0.937838	0.307726	0.35906	0.650431	0.54337	0.975004	0.450622	0.37644	0.544352	1.00953	0.326114	0.655197	1.02482	0.376209	0.208334	0.396184	0.342576	0.605133	1.10056	0.723591	0.576779	0.27968	0.606023	0.696371	0.741898	0.92424	0.434695	0.866998	0.509365	0.372411	0.481247	0.431836
TAAR6	0	0	0	0	0	0	0	0	0	0	0	0	0	0	0	0	0	0	0.0208263	0	0	0	0	0	0	0	0	0	0	0	0	0	0	0	0	0.0332802	0	0	0	0	0	0	0	0	0	0	0	0	0
MAPK15	1.04623	2.27189	24.4074	0.54758	11.3182	3.57807	1.97226	3.40565	2.0946	22.8481	0.908113	3.71163	4.66255	3.23438	3.41309	0.929299	1.03891	1.16417	1.39355	1.27636	4.91718	4.40012	8.83175	1.17524	1.16135	5.06751	2.04983	2.17352	3.33459	8.4718	0.726442	0.94219	3.53716	0.385268	0.622512	3.08597	3.58418	1.02424	1.83111	6.49055	4.5239	0.745325	3.13725	1.31322	10.7342	12.628	0.417261	2.26914	1.87847
PCSK1	0.0855351	0.044672	0.0578984	0.0320665	0.0440373	0.0434685	0.0196945	0.0520651	0.096013	0.158913	0.027236	2.02031	0.0557243	0.0201569	0.156416	0.0959196	0.0355396	0.0248288	0.0692484	0.054443	0.0341147	0.0517098	0.205301	0.00650726	0.0288672	0.0382282	0.0607549	0.0233945	0.0052038	0.0735177	0.037066	0.0121922	0.0923687	0.054417	0.129284	0.0260372	0.110776	0.0229049	0.515068	0.00783551	0.114046	0.0334434	0.0459755	0.00779596	0.0441064	0.123691	0.0357859	0.211556	0.110809
EVI5	4.12802	4.34192	5.92647	3.92062	5.40979	5.16975	5.72098	4.65747	5.88364	5.15139	6.09533	4.98203	4.56412	4.66874	4.43947	3.4283	3.64258	4.45006	5.52981	6.13282	5.55216	3.63353	5.09739	5.14088	4.83141	5.36855	4.26325	3.15787	4.62167	5.62353	4.48888	3.25632	4.27531	3.85993	3.6779	4.74595	5.2379	4.6854	4.47447	4.0347	4.71896	4.5572	2.76262	4.41927	5.05867	5.73172	4.98622	3.67082	5.48148
SUOX	6.71539	5.86329	5.83897	7.00008	5.40665	7.19824	5.39845	4.36791	5.51015	7.13672	5.24136	6.08388	6.32923	7.01901	7.10585	5.02347	7.18706	6.1305	2.44753	4.20201	6.07346	5.19418	6.33973	5.09598	5.44515	6.05634	6.32172	4.66076	5.17259	4.61321	6.57082	3.57888	4.36962	4.49795	4.35918	6.89793	6.09807	4.55107	5.32432	7.00801	5.16498	5.35736	5.96395	5.99778	5.74899	4.75324	5.7588	7.60916	7.07342
GGT1	13.9454	7.8979	4.20984	13.6952	8.38052	8.50814	8.13236	2.9704	8.98865	6.88004	10.0599	7.26359	7.01518	10.0121	9.4339	4.22966	15.2991	4.12327	3.78822	6.01664	5.27543	6.91222	3.12111	6.84606	10.4574	8.63242	6.04242	7.07715	8.2339	5.05328	9.41782	6.6178	5.4994	9.66946	7.69472	6.70796	10.251	6.18198	6.40905	5.13927	9.54067	8.55932	8.59076	3.6857	5.87482	4.23876	8.71931	6.73237	6.65022
SELPLG	44.4027	46.2253	23.5932	36.3007	28.1791	52.489	49.6889	34.4741	42.0936	17.5956	24.0632	36.1019	56.1835	37.3846	48.4788	30.3047	58.3447	43.7196	30.641	28.0743	44.2672	52.7177	48.6143	36.348	28.4099	39.141	45.7715	32.7935	63.0287	33.7573	35.6844	35.3486	49.4757	46.9145	62.9489	34.2539	17.9892	62.8495	38.981	37.7649	33.0811	22.6777	43.5696	30.1258	41.4836	43.2763	43.2853	49.7837	40.7132
ABAT	1.54747	2.86055	1.57538	0.931454	1.65836	1.81981	1.8521	1.46747	1.51159	3.12777	1.80083	2.20069	3.31917	1.08685	2.1557	0.525169	1.72272	1.16634	0.858585	1.49248	1.10367	2.89934	2.69731	1.77561	1.43335	2.48808	2.14138	1.12445	1.1932	2.00205	2.13702	1.24176	1.6808	0.709029	2.67892	2.55612	1.14315	1.69971	1.33383	1.1053	1.48094	0.953236	2.40533	1.45214	1.4379	1.88275	1.70681	1.98589	1.67546
ARL14	0.091513	0.0261729	0.0494698	0.0657561	0.0258011	0.130735	0.0538477	0.142354	0.0123054	0.0449476	0.0223402	0	0	0.0330673	0.167348	0.227751	0.0728782	0.0763715	0.434359	0.297712	0.0559651	0.0669707	0.0443152	0.186815	0	0.0261305	0.237305	0.21588	0.042684	0.215367	0	0.0250016	0.00971349	0.0171675	0.0120506	0.160177	0.0239114	0.0469691	0.139499	0.0321353	0.0246174	0.0914395	0	0.0319731	0.0775246	0.0800981	0.146766	0.0765566	0.0216406
GOLGA3	8.27054	8.47176	9.44372	5.70751	8.95899	7.6925	7.91566	8.00338	7.85895	10.2955	9.29997	9.95094	7.79776	6.52381	8.58325	2.66903	7.1421	9.27672	7.92581	7.35332	9.85033	4.46991	8.84889	9.6368	8.9523	10.2016	7.51091	2.73317	8.56506	10.5715	8.09212	3.17081	8.32787	3.1269	7.94451	10.1473	8.33804	6.6683	8.20797	9.22711	7.54554	6.5414	3.96972	7.56089	9.16639	8.59631	8.24211	9.8313	8.59199
FNDC7	0	0.0101644	0.0192118	0.0170245	0.01002	0.0092312	0.010456	0.00691051	0.00477886	0	0.0173519	0.024848	0.00806856	0	0	0	0	0.0197728	0	0	0.0434687	0.00433474	0.0114734	0.0103644	0	0	0.0138238	0	0.0165766	0.00836389	0	0.019419	0.00377228	0	0	0	0	0	0.0309573	0	0	0	0.00861493	0	0	0.0207377	0	0	0.0168085
ATP6V1G3	0.0271103	0	0.0175862	0	0	0	0	0.0316289	0	0	0	0	0	0	0	0	0	0	0	0	0	0.0198398	0	0.0474369	0	0	0	0	0	0	0	0	0	0	0	0	0.0425019	0	0	0	0	0	0.0394299	0.0568312	0	0	0	0	0
TNNC2	1.5771	0.889223	1.40304	1.39224	1.18149	2.05407	1.71016	1.26169	1.23604	1.92546	0.693007	1.46496	0.49104	2.29576	0.782804	2.50791	2.40426	1.35376	1.13518	0.989484	1.32272	0.774929	1.46196	1.37978	0.961861	1.38957	2.12076	2.97631	2.11223	1.59067	0.834058	1.51419	0.990044	1.03973	0.480619	0.788694	0.706424	1.07541	1.53076	1.99371	1.01819	1.14811	1.3435	0.708444	2.29034	1.4987	1.17691	0.565435	1.56637
TUBB3	0.209392	0.0305804	0.0173401	0.044817	0.0376824	0.0034716	0.0157289	0.051977	0.0107832	0.170679	0.045679	0.0841019	0.0242749	0.0193178	0.0814704	0.0967652	0.0993424	0.0223081	0.0975969	0.0326105	0.0408684	0.0423846	0.0258889	0.0701595	0.0230547	0.076327	0.149031	0.175162	0.0685739	0.0251634	0.00634342	0	0.0340476	0.300876	0.0950389	0.218342	0.0349225	0.00685983	0.10478	0.0281601	0.0719073	0.0267094	0.0161992	0.0933931	0.00754829	0.0311955	0.0244974	0.119265	0.0442484
EFNB2	31.6462	26.2682	34.9041	20.6951	27.1972	18.7163	38.3539	15.8615	40.8769	17.0341	35.9976	33.2307	13.9816	43.1487	10.914	25.891	22.4433	29.9361	23.8662	32.4703	42.5081	13.2357	23.438	32.7148	26.0424	28.3252	33.0304	10.708	12.8271	27.1063	38.2055	25.3972	22.845	16.8764	9.707	18.6392	28.2017	17.01	30.0709	23.1918	28.0061	21.1527	17.6792	16.258	19.0694	20.9106	24.5886	15.5521	22.3659
TMEM25	5.25088	3.24651	4.10087	3.5601	3.9733	4.52279	4.46127	2.77776	3.67768	3.95533	3.56583	3.66125	2.9126	4.69758	3.17244	3.90079	3.87747	3.76543	2.21299	3.30961	3.74602	1.97489	4.35602	3.56021	4.8166	4.32369	4.57915	2.95286	3.26664	3.37708	3.35447	3.03099	3.25086	3.70446	2.32392	3.13021	4.18595	3.22083	2.75178	4.54262	4.54	4.37103	3.25001	3.01562	4.71738	3.8117	4.16605	3.48788	3.34779
CDC20B	0.0658462	0.0979273	0.766002	0	0.103962	0.205238	0.038745	0.0819424	0.0247914	0.737377	0.0192893	0.119697	0.185369	0.114206	0.0642196	0.143017	0.181785	0.00732686	0.0336575	0	0.0322148	0.472236	0.552691	0.00768106	0.00567906	0.293306	0.167333	0.165687	0.0859946	0.316124	0.0187509	0.0215872	0.106235	0.014823	0.00693657	0.00768345	0.151403	0	0.0975058	0.120236	0.1913	0.0131587	0.0670378	0.0736177	0.252875	0.468747	0.00603443	0.00734462	0
TAAR5	0	0	0	0	0	0	0	0	0	0	0	0	0	0	0	0	0	0	0	0	0	0	0	0	0	0	0.0151416	0	0	0	0	0	0	0	0	0	0	0	0	0	0	0	0	0	0	0	0	0	0
MIR449C	0	0	0	0	0	0	0	0	0	0	0	0	0	0	0	0	0	0	0	0	0	0	0	0	0	0	0	0	0	0	0	0	0	0	0	0	0	0	0	0	0	0	0	0	0	0	0	0	0
MOV10	6.89512	6.17623	8.07033	4.03938	6.36032	5.97304	6.43907	4.7686	6.34089	7.97061	5.12968	10.3413	6.86464	7.89516	6.65381	2.81543	5.70839	6.81201	4.81242	5.71881	9.09546	5.07703	6.67793	7.57107	7.51987	8.35322	7.73696	2.70378	4.53558	6.06693	6.51482	3.5886	6.40339	3.70302	5.42619	8.05639	6.52198	4.44	7.22634	8.27956	5.67702	4.26282	4.42106	7.32246	4.71608	7.00109	5.52287	6.6611	7.2879
SMIM19	5.29415	7.14764	9.09073	7.41936	7.97623	6.78337	5.3771	5.90973	7.02331	7.80802	5.60918	5.94008	5.55453	8.18646	5.36566	10.3178	4.91362	5.22225	4.71688	5.80565	6.07953	7.39616	6.81924	5.70459	4.9039	6.6442	6.76074	12.2441	5.29045	6.2388	4.95376	8.31933	5.60596	9.44235	3.45623	5.6212	6.74363	5.05735	6.14803	6.30512	6.2359	5.30206	8.06795	7.01793	8.35149	8.16876	5.02348	5.85365	5.35756
FOXA2	24.5964	15.1189	23.8546	11.8442	17.7899	40.3002	16.3691	21.4512	19.2326	24.9921	12.0942	16.651	12.4559	27.1397	19.7026	7.72981	20.4332	23.5514	7.45782	15.2623	22.6882	13.439	16.8676	13.8906	9.71099	32.1891	12.8586	13.0093	10.9066	17.7617	21.7534	9.53286	10.1211	6.82742	10.9807	17.1198	20.6949	13.1106	13.4336	29.8095	19.3479	24.6487	16.2217	14.8772	31.1009	16.1131	17.8023	18.8512	18.6328
PAAF1	2.00173	1.47214	2.60346	1.83677	2.03171	1.61019	1.7997	0.942848	1.93798	2.35228	2.08335	2.14364	1.4057	2.21304	1.81435	1.64052	1.69115	1.25341	0.991414	1.37724	2.2263	1.56135	2.29751	2.19726	2.14571	2.07896	1.91703	1.89666	1.53445	1.43257	1.71717	1.69566	1.50761	1.66533	1.22594	1.98033	2.29614	1.8761	1.69923	1.93324	1.82212	1.74793	2.0036	1.56381	2.29611	2.3201	1.3844	2.00533	2.0675
FAM124B	2.34651	2.14244	1.392	1.09735	2.08371	0.816516	0.905177	0.253602	2.91842	0.722716	5.91881	2.3966	0.425171	2.33823	0.366927	2.74652	1.05641	1.2838	1.31257	1.61831	2.14741	0.265128	2.42914	2.70148	2.0262	1.49919	2.29372	1.20088	0.623927	1.08609	0.817407	3.17947	2.88585	1.46802	1.08771	0.507295	2.02722	1.44178	2.03182	1.02167	1.38539	0.701716	0.644463	0.794514	0.916006	0.839088	2.05339	0.876592	1.18623
C19orf38	2.40871	3.80877	2.54419	1.23238	1.89866	2.56483	2.04807	4.54631	3.32708	1.33792	2.14272	3.54452	3.67621	3.69107	2.35228	3.25269	3.41464	2.27328	5.66343	2.64621	2.3137	6.0819	1.92978	4.43536	5.49817	2.72231	4.23819	3.98644	1.85287	2.52864	3.50145	7.11125	4.0318	6.6857	7.89136	2.51636	1.97708	4.01951	6.245	2.78992	2.99212	2.62729	6.08948	3.64824	2.07257	4.01784	3.05113	3.65029	1.75354
NOP14	10.1861	9.77361	8.59067	10.5499	9.08741	8.34596	10.2707	11.4023	8.96522	11.2445	10.0011	9.68812	9.75682	8.39937	10.2623	5.64916	9.39134	10.0184	13.2224	9.65003	8.42293	9.15671	8.70369	9.05811	8.94883	9.8151	9.95078	3.89519	11.4666	10.6181	9.22944	6.75754	10.562	6.69957	15.1659	9.89087	9.2964	11.0201	8.86306	9.01476	10.4713	8.78725	6.80302	8.80553	9.10167	10.1069	8.16685	11.6107	8.57975
INSL4	0	0.0173503	0.032794	0.0145301	0.0342075	0	0	0	0	0	0.0148096	0	0	0	0.0184894	0.0274507	0	0	0.0110747	0	0	0	0	0.123841	0	0	0	0	0	0	0.0143962	0	0	0.0113805	0	0.0176971	0.0475533	0	0.0132108	0	0.0163191	0	0	0	0	0	0	0	0
PDIA3P2	0	0	0.243091	0	0.211307	0.0973365	0	0.145733	0.201559	0	0	0.262005	0	0	0.68528	0	0	0.416982	0	0	0.229173	0	0	0	0.323203	0.214006	0.19435	0	0	0	0	0	0.0795522	0	0	0.437276	0	0	0.163211	0.263184	0	0	0	0	0	0	0	0.417992	0.177234
USH2A	0.00288739	0.00660642	0.0324658	0.00138315	0.0130251	0.00899981	0.00339798	0.00449153	0.00776512	0.0226908	0.0126877	0.0201877	0.00524421	0.00730331	0.0193604	0.00391961	0.00459887	0.00803218	0.00316264	0.00469666	0.00353159	0.00704348	0.0223715	0.00336819	0.00373545	0.0115425	0.00374369	0.00908183	0.00538702	0.0231037	0.0013704	0.00788844	0.00490364	0.00866662	0	0.00505386	0.0105623	0.00148196	0.00503022	0.0101392	0.00466033	0	0.00489941	0.00201761	0.00815345	0.0219027	0.00132307	0.00322066	0.00409679
CDCP1	5.96912	7.86449	4.10035	5.1434	4.47925	8.14456	5.96453	6.84723	4.73755	9.506	5.40225	4.74597	11.6677	3.92249	8.28654	3.87035	7.73913	7.47729	3.84714	3.54483	3.98988	7.85983	6.0631	4.72873	3.89647	8.31941	8.73979	4.76527	8.70896	6.46281	5.10462	4.45481	7.90238	4.36305	10.9228	7.28377	4.29385	6.84652	4.08984	4.95265	5.65429	3.60042	5.91788	9.442	6.07934	6.29708	5.26189	6.93211	6.24869
TMEM198	0.857434	0.499215	0.819417	0.550093	0.68638	0.578658	0.770307	0.455514	0.518831	1.25213	0.504605	1.15616	0.698704	0.81329	0.825986	0.904147	0.768189	0.587786	0.519899	0.336225	0.955096	0.711523	0.719208	0.642992	0.623965	0.537753	1.10775	0.830748	0.610607	0.745898	0.555923	0.652563	0.609448	1.43043	0.562524	1.01839	0.648112	0.848724	0.900259	0.919408	0.531327	0.780251	0.86293	0.609845	0.58369	0.603066	0.831394	1.21685	0.706047
OFCC1	0	0	0.00266336	0.00590031	0	0	0	0	0.01325	0.00604974	0	0.00861178	0	0	0	0	0	0	0	0	0	0	0	0	0	0	0.00638803	0	0	0.00579748	0	0	0	0	0	0	0	0	0.00536455	0	0	0	0	0	0	0	0	0	0
GNGT2	2.47726	3.87003	2.21339	1.84719	2.54995	2.45848	2.99096	1.51324	2.79056	1.65292	2.72138	2.25489	7.52892	2.49539	3.78222	2.9663	3.79674	1.89185	1.72788	2.623	2.48685	5.50712	1.82206	3.435	3.44673	3.24315	2.66348	4.24508	2.58343	1.848	2.49568	3.25628	3.10324	2.84096	4.24687	2.86339	2.07009	4.12024	2.76348	2.43737	2.65929	2.57452	4.46125	3.77233	1.66304	2.22963	1.95972	4.82906	3.59777
GSTM4	3.94003	3.20069	2.73642	2.21811	2.89228	2.75191	2.32901	1.50553	2.34181	4.35151	2.5255	2.83561	3.23007	4.6198	2.23423	1.80575	2.2914	2.49173	1.39367	2.0726	3.03734	3.3516	3.02473	1.81525	2.92274	2.79916	2.94137	1.33591	1.9625	2.14373	2.82558	2.45307	1.86237	2.50627	2.80739	1.78418	2.24977	1.90349	2.42761	1.78975	3.0338	2.40004	2.61289	2.48542	3.07442	2.0375	3.40874	3.32633	2.6772
DDB1	16.8346	14.9844	15.5919	13.787	14.8098	12.7785	15.4717	14.3882	14.0478	20.2213	16.1555	13.8435	13.1955	15.5666	14.7211	12.2013	15.4492	15.6892	12.9148	12.1785	13.2534	11.2813	16.5866	14.378	15.4791	15.3624	16.0965	13.0874	12.7294	15.5924	14.3549	12.3703	15.9607	11.894	15.9768	14.7144	14.8186	13.6674	13.0823	14.4035	17.1491	13.6707	12.1703	14.3427	14.5022	15.6226	14.5145	14.8679	13.5358
EIF2B1	11.3292	12.6339	11.1261	11.855	10.8343	9.95597	10.9792	8.25298	10.9974	12.0911	10.7918	12.8744	11.667	12.1454	10.1796	11.6046	9.16956	10.7444	7.83769	9.81154	12.2295	11.0505	10.6772	11.4352	10.9608	12.2312	10.7903	9.99536	9.28166	8.77469	10.3588	10.2578	9.91124	10.6572	9.19182	12.2102	11.5764	10.2302	11.781	12.233	9.863	9.83576	10.6367	9.60468	10.2336	11.402	9.3877	11.7901	11.2954
C6orf141	0.409495	0.380149	0.252572	0.704246	0.545087	0.805576	0.130352	0.618721	0.308714	1.22655	0.353979	0.408336	0.246898	0.523947	0.515591	0.236935	0.149689	0.313729	2.19118	0.229309	0.3818	0.383191	0.403097	0.493343	0.182379	1.05809	0.778126	0.306164	0.291195	0.265414	0.181607	0.0440164	0.200937	0.120896	0.270498	0.458247	0.315728	0.248074	0.526274	0.5799	0.379225	0.0402458	0.156217	0.576972	0.648306	0.364292	0.175335	0.31449	1.01915
SNF8	7.70727	7.30053	9.08584	7.77151	7.62126	8.54463	6.82907	6.33537	7.61411	8.69674	6.43442	9.04132	9.52944	8.80545	7.86888	7.97655	7.36063	7.01337	6.4443	6.62472	8.10073	8.59475	7.70388	7.39173	9.30236	8.33452	8.29446	11.1433	8.02295	7.176	6.65474	8.13406	6.72109	9.41701	7.68131	8.44939	7.46233	7.53094	7.67261	7.9931	7.48923	7.61127	8.52705	8.00771	7.62687	8.24062	6.95002	8.87881	7.76324
SSNA1	35.3685	32.7226	33.0296	32.4626	30.2257	36.9594	26.8291	21.9164	32.1694	39.0125	23.1168	29.2542	36.9292	40.221	30.8745	43.1206	35.3409	27.7066	20.5396	22.4289	33.3322	46.8463	29.4879	25.1051	35.6988	32.1265	33.2381	43.2128	33.1492	27.2089	29.9779	45.6976	29.431	53.0862	33.7967	34.9244	28.4043	34.9872	24.8283	32.69	30.4547	30.7059	45.3868	33.9589	35.5306	37.3526	23.2321	48.4295	30.5594
SOX9-AS1	0.0258232	0.0759651	0.157941	0.0450624	0.112329	0.0546176	0.0325603	0.0473428	0.0580377	0.135893	0.0378239	0.0309509	0.017588	0.073981	0.0640875	0.085133	0.035254	0.061573	0.00808139	0.0360036	0.0270724	0.0215975	0.158991	0.0322748	0.0167039	0.0600415	0.0903999	0.0406114	0.0283909	0.0807404	0.0288892	0.0241885	0.0481626	0.0249137	0.0145733	0.0258279	0.124344	0.0255609	0.0433807	0.0893842	0.0595419	0.0165873	0.045606	0.0231999	0.0562524	0.122697	0.0481762	0.00308611	0.0785129
FOLR1	162.421	185.682	151.888	174.799	161.09	211.173	184.139	135.804	143.743	275.708	124.799	100.329	113.999	202.386	142.649	161.023	158.788	123.87	108.486	170.97	137.582	107.45	139.499	126.639	158.655	152.426	144.375	210.461	180.34	135.914	114.9	169.515	105.177	128.316	100.403	166.634	180.625	143.466	86.6012	159.371	139.297	175.608	136.662	152.821	254.492	166.435	118.02	135.478	116.38
SMYD5	6.87851	5.94189	6.07942	5.96625	4.99811	5.46006	5.85468	4.42123	5.51657	9.14592	4.67835	5.89109	6.10866	6.38037	5.39235	5.6041	5.55224	4.77555	4.96952	3.576	5.37784	4.85861	5.51949	5.10859	5.37856	6.69255	6.50485	5.39044	4.92686	4.43587	5.17131	3.98179	6.002	6.17805	6.20046	5.64164	4.72359	4.87303	5.3177	6.08983	6.39926	4.37584	6.2378	4.60246	5.20381	5.78542	4.80809	7.34677	5.20291
POGZ	7.75849	7.45474	10.4147	5.33459	8.59366	8.06538	8.44871	8.89246	8.95833	9.57197	8.97474	11.5985	6.98545	8.00628	7.15011	2.73083	5.58494	9.30009	9.82394	8.00237	9.84901	4.15499	9.16839	9.44374	6.56223	11.4026	7.73062	2.67721	6.83155	8.46743	8.01293	3.10544	6.77898	2.57139	5.75493	8.38398	9.07879	5.79853	8.69371	11.1325	6.99618	7.43837	3.60628	7.68899	8.09605	7.83003	7.82071	6.31689	9.35884
CPXM2	12.8475	1.59616	2.81139	9.18186	3.53173	0.949527	5.73607	2.81958	2.33653	14.0049	5.64601	2.91371	1.25044	2.93685	1.55983	2.2662	5.41488	5.87104	1.40589	2.33887	3.59933	2.18776	9.88579	1.90474	1.22437	2.35904	10.6581	2.39545	2.9441	1.38797	1.15089	1.37824	6.92745	1.98876	4.59234	4.53583	3.10114	3.15836	3.30635	2.27641	8.73896	0.730538	2.04107	2.04354	1.2525	1.59982	9.7155	3.85329	5.26748
ANAPC2	6.6923	5.39696	8.42863	4.18126	7.55749	6.4741	5.61576	4.92474	6.29384	7.44246	4.74463	9.56072	6.43114	7.65128	6.37414	3.18236	5.71332	6.47099	4.76645	5.14524	9.55923	5.92901	7.0184	6.39707	6.37037	7.49259	7.28642	2.88334	6.49473	5.88374	5.22096	4.27045	6.54884	5.13871	6.37535	8.79634	6.10648	4.80355	7.54638	9.3747	5.31598	5.70217	5.31202	6.11445	6.73444	6.93897	5.74793	7.32327	7.18195
KRT4	5.9769	7.91476	19.6719	7.71584	3.12495	40.9693	9.81438	4.10877	9.01447	29.2831	4.01504	2.6373	11.421	14.3534	10.6465	22.82	17.6536	12.7211	7.51268	10.4539	1.44313	3.62392	10.094	10.6355	20.0749	18.5807	13.9536	14.0574	22.797	13.5472	5.62536	12.3762	11.2713	4.68172	4.83528	6.58145	17.881	16.4057	1.57278	30.434	10.9165	24.204	8.98763	11.7923	44.1612	22.4589	21.3639	7.67708	9.68942
SLC12A6	4.80258	7.20735	5.88576	4.4338	4.66801	4.75629	4.40344	4.08493	5.31405	4.89312	6.87923	7.24527	9.0203	5.09758	5.52353	1.91561	5.17036	5.89974	4.0114	5.09993	5.1095	5.39902	6.9741	6.47342	4.41039	7.17212	5.72097	2.07418	4.41876	5.14635	6.33789	2.51584	5.9684	2.12515	5.18385	5.85709	5.21843	4.23682	6.68278	5.85951	4.63126	2.90041	3.85359	5.6489	4.55895	5.13631	6.34833	5.72029	7.15389
PRSS3	0.0355823	0	0.0307759	0.0511348	0.0401281	0.0277269	0.0628116	0.0276752	0.047846	0	0.0521183	0.0248779	0.0646261	0	0.0433791	0.54743	0.0377822	0	0.0519657	0	0.0217604	0.0433995	0.0459486	0.0622609	0.0920663	0	0.147631	0.0932653	0.232351	0.0502436	0.0506635	0.233308	0.0604291	0.0400506	0.149937	0.103801	0.0371891	0.0913132	0.0464917	0	0.0382872	0.0533306	0.0258758	0.0248637	0	0.456777	0.0163046	0.0198446	0.0168287
CD248	19.7826	6.24926	8.13312	18.9492	13.5347	2.33273	13.0614	3.57359	11.9953	33.3444	8.47584	13.0114	4.44571	13.7082	3.92236	11.364	19.5515	14.3974	17.2316	7.34183	11.7914	7.00711	9.86368	6.6152	9.61232	8.82994	22.9704	8.53018	6.26177	3.30107	10.0958	6.09605	12.8592	32.3841	12.2528	16.5432	5.3343	4.455	9.325	8.71326	19.1155	11.3327	5.31344	5.88734	3.04585	4.38953	21.9656	17.7629	7.58641
CCDC106	5.67537	3.05048	4.89143	3.48645	4.07935	6.19368	3.54954	2.43093	3.99108	5.27088	2.69981	5.0428	4.68419	6.01795	4.55639	2.31425	4.93163	3.57505	2.58551	2.70193	5.17277	3.97205	4.21947	3.16148	6.05102	4.66815	5.55995	2.84149	4.50591	3.59029	4.08709	3.85741	3.97632	4.7972	4.50707	5.24102	3.43793	4.15059	3.63632	4.43614	4.79764	4.08386	3.75633	4.2152	5.19667	4.64224	4.28645	5.30244	4.42423
RNA5SP473	0.15789	0	0.819378	0	0	0	0	0	0	0.465298	0.231266	0.331175	0	0	0.288731	0	0	0	0	0	0	0.231094	0.305834	0.552545	0	0	0	0	0	0	0	0.258816	0.201108	0	0	0	0	0	0	0	0	0	0	0.330985	0.535023	0.276392	0	0	0
TMEM56-RWDD3	0.271739	0.414496	0.319906	0.260342	0.170253	0.164693	0.106597	0.0587093	0.178638	0.296595	0.28009	0.506642	0.356449	0.26184	0.20245	0.327896	0.0801499	0.30237	0.132286	0.171894	0.203112	0.117845	0.428885	0.440261	0.247388	0.413824	0.211396	0.253248	0.126746	0.0852681	0.200622	0.131982	0.153831	0.317191	0.119276	0.38755	0.173562	0.201457	0.210402	0.25446	0.194931	0.0905069	0.175655	0.10549	0.272832	0.246653	0.221363	0.151552	0.385558
MAP3K6	8.86559	7.44941	15.9912	5.78598	21.2889	6.6319	11.456	9.63168	16.2898	4.71665	16.8335	16.2962	9.76876	9.05302	9.96504	4.62134	12.2666	13.806	22.7093	7.27527	20.4121	11.2314	10.7445	11.809	16.7968	13.7888	9.53593	3.54208	13.8167	13.1659	14.0535	11.0498	17.9006	8.31425	17.88	13.5639	23.6919	19.8563	15.8495	17.243	13.0933	13.694	11.4507	13.0863	12.3463	14.7519	14.5381	10.8115	8.60845
PRM1	0	0	0	0	0	0	0	0	0	0	0	0	0	0	0	0	0	0	0	0	0	0	0	0	0	0	0	0	0	0	0	0	0	0	0	0	0	0	0	0	0	0	0	0	0.0788654	0	0	0	0
CNOT1	14.5494	16.1818	15.7451	10.4544	13.3675	11.5982	16.6203	14.8844	14.7112	17.4213	18.0344	14.2478	12.9319	14.0192	14.8031	6.33998	13.2176	18.0462	12.6017	12.8685	13.37	8.4661	18.9332	15.6154	14.2676	17.6823	15.1089	6.17799	11.2202	17.7452	16.7567	6.80311	15.4116	5.46975	14.3174	15.5057	16.3945	12.0386	13.8086	13.3156	16.5909	9.90293	8.37051	15.2271	14.1342	15.8036	15.098	12.7436	14.9588
HSPA6	2.1476	2.35689	3.30464	1.19624	1.85872	1.99131	1.57226	2.59295	1.9543	1.75394	0.694969	3.61415	3.33363	1.89492	2.49641	3.96623	2.05499	1.77837	13.3755	5.07749	3.54305	3.75856	1.49144	3.53934	1.34611	3.28003	2.32474	0.981822	3.6923	2.45656	1.92004	2.21047	0.848199	1.93945	4.3801	1.76294	1.04399	1.46113	5.81875	1.98182	1.03451	1.99617	2.18526	4.25772	1.38212	2.17115	2.47164	2.82722	2.7873
GPR25	0.527028	0.218301	0.259356	0.0261167	0.153713	0.226581	0.0962417	0.106012	0.498515	0.0803346	0.0532381	0.381186	0.0990219	0.531908	0.432033	0.0986809	0.3184	0.424661	0.0796233	0.088683	0.966917	0.0930971	0.440023	0.858581	0.235111	1.0586	0.282756	0.428711	0.101718	0.102646	0.232884	0.268111	0.439808	0.225011	0.387682	0.349901	0.0284911	0.11193	0.35618	0.957253	0.146662	0.0817146	0.211454	0.761936	0.215536	0.795326	0.074947	0.760161	0.283639
CORT	0.104795	0.0299715	0.226598	0.0752994	0.118183	0.190538	0.154157	0.0407536	0.098639	0.205884	0.0767476	0.329709	0.166541	0.113599	0.0638786	0.0474192	0.0834552	0.0874555	0.0191307	0.0426149	0.0961311	0.115036	0.253734	0.213928	0	0.418921	0.095111	0	0.0733183	0.0739871	0.0497369	0.0286301	0.0778626	0	0.0689974	0.183424	0.0273817	0.107572	0.251028	0.147197	0.0281902	0.130888	0.0635065	0.0732268	0.207144	0.152872	0.0720287	0.11689	0.0991254
METTL7A	63.2983	50.5404	144.415	48.223	89.8731	77.7961	55.3524	59.1407	81.398	88.4043	111.484	64.27	48.363	60.8562	67.4537	62.429	58.8969	70.4093	42.8489	65.9874	71.8157	52.867	104.702	61.8872	58.145	88.7101	55.4769	51.7007	41.665	80.7455	58.6253	50.0217	49.6305	38.5153	25.8477	49.884	99.0533	55.6127	51.8022	82.9624	72.526	75.1145	54.0705	59.0958	102.757	89.6175	60.5211	39.4672	48.3724
WT1-AS	0.0603339	0.0365414	0	0.0255015	0	0.00276554	0.0375898	0	0	0.721668	0.0103968	0	0	0.00384724	0.0129802	0.0626316	0	0.0770078	0.0155495	0.00865939	0.0130226	0	0	0	0	0.00608036	0.538385	0.0837224	0.0546273	0	0.0101066	0	0.036164	0	0.0140203	0.00621198	0	0.0273233	0.0185488	0	0.0114565	0	0	0.0148798	0.00601312	0	0.0439089	0.0593803	0.0151068
ISLR2	1.04488	0.0832678	0.0860373	0.381208	0.120391	0.171412	0.553914	0.109449	0.219234	1.09155	0.336418	0.678525	0.0749116	0.238457	0.153807	0.197612	0.283382	0.907094	0.127559	0.252574	0.18992	0.0686539	0.294505	0.0905662	0.0460356	0.232772	0.312055	0.203499	0.117691	0.0685178	0.649449	0.0318165	0.453243	0.120158	0.1738	0.571878	0.096359	0.0747149	1.06937	0.858788	0.704871	0.426668	0.221133	0.162753	0.213755	0.0622912	0.827132	0.211086	0.220315
ZNF223	0.480216	0.498505	0.573029	0.281157	0.481392	0.341862	0.429083	0.124501	0.430485	0.358163	0.547078	0.59689	0.452247	0.411309	0.401136	0.402401	0.358823	0.286965	0.266244	0.376097	0.511217	0.32106	0.413413	0.394201	0.306795	0.528167	0.350518	0.344978	0.306943	0.276257	0.219476	0.16521	0.286952	0.253577	0.281047	0.300931	0.520492	0.3195	0.472524	0.637049	0.325343	0.124401	0.314728	0.347987	0.3817	0.383993	0.277095	0.456289	0.445826
TGFB3	11.8442	3.68728	3.50161	10.1296	3.79794	2.73533	4.56586	5.77285	5.73545	10.179	5.04748	4.25425	1.59753	4.48005	2.77626	4.62887	4.96406	6.28129	10.3073	5.91891	2.59375	2.11918	3.3647	3.6052	2.85779	3.8258	8.94535	3.10766	4.14192	2.30252	5.97025	1.88292	4.59133	6.44199	3.86821	6.15817	2.58789	1.44091	6.08738	3.13946	6.32691	2.67274	1.32309	4.79066	1.87133	2.39045	5.57634	6.00084	5.91515
DNAJC4	11.3623	10.316	9.36833	8.84127	9.43197	10.2729	7.89381	6.5706	9.53574	10.4845	7.5489	9.96945	10.5354	11.9815	8.8332	8.28476	9.92206	9.00113	6.8003	5.60978	9.45546	10.188	8.55289	7.93533	10.1423	9.25126	11.1583	8.38166	8.52011	8.27019	8.18914	8.96683	8.481	10.7868	8.42166	11.4329	7.49559	9.91676	8.21302	11.3328	9.35107	8.24086	13.6929	10.3322	9.37529	9.44035	8.11895	11.611	9.15806
RASIP1	11.5402	7.99146	14.5185	11.9152	19.4252	4.64822	13.5445	11.1549	19.5653	4.82933	12.9248	20.893	4.1276	21.5956	4.93223	16.5181	11.645	12.2588	14.4691	14.8562	24.3403	7.34526	7.07181	11.6861	13.8035	11.2547	10.9167	6.04465	11.5485	10.203	11.9883	10.3162	15.3382	12.0899	11.0496	9.94131	11.328	8.38646	18.6398	12.5882	14.9562	17.4818	11.8065	6.00305	6.48791	9.92586	16.4917	5.58714	7.90345
ACAP2	4.232	6.5585	5.99835	5.11744	5.4353	4.71694	7.75255	5.32257	6.87454	4.96456	7.7874	7.27926	6.75134	5.37461	5.61919	5.41958	4.98749	7.20578	4.08711	8.06046	5.65711	4.65856	6.4214	7.30874	5.26369	7.55452	5.03502	5.89059	4.85861	5.41678	6.29867	4.35609	5.6617	4.96724	4.3647	5.69533	5.64949	4.46624	7.57757	5.7748	6.63	4.93544	4.27811	6.34105	4.85132	6.60961	6.72292	5.41743	6.00458
TTC6	0.143992	0.287599	0.733468	0.139083	0.499141	0.426739	0.170843	0.349752	0.302809	0.337384	0.221281	0.410948	0.199358	0.255885	0.388497	0.0288395	0.0864729	0.133957	0.162889	0.328289	0.251183	0.139925	0.434371	0.342821	0.18323	0.400368	0.15058	0.0742463	0.277454	0.489973	0.241992	0.0541716	0.163862	0.045168	0.0951159	0.210715	0.366367	0.156288	0.333099	0.303381	0.262886	0.159207	0.0755303	0.262263	0.351947	0.334705	0.149267	0.233018	0.519131
KCTD4	0	0.0181597	0.00686476	0	0	0	0	0.0123463	0	0.249489	0	0	0	0.0114716	0	0	0	0	0	0	0.0194152	0.0619554	0.0102491	0.0185169	0	0.0362605	0.0987901	0.0332854	0	0.0149429	0	0	0	0	0.00836108	0.0185227	0.0331811	0	0.013827	0	0	0.015861	0	0.022184	0	0.0185249	0.0145474	0.0354117	0
PSD3	1.8461	1.57173	2.38585	1.40201	1.73813	1.36677	1.66491	1.50751	1.23194	3.07385	2.30499	1.66534	1.98634	1.31914	1.37599	0.877036	1.51254	1.60453	1.06717	1.01609	1.10677	0.969346	2.52047	1.60491	1.02548	2.14262	1.49873	1.07318	1.66284	1.39773	1.32074	0.803857	1.9003	0.849863	1.15518	1.40559	1.01287	0.721123	1.34251	1.4405	1.90129	0.804996	1.00381	1.5692	1.28366	1.62151	1.73881	1.13957	1.23513
GABRP	0.533875	0.205215	1.21351	0.0797914	0.317898	0.695574	0.407127	0.284023	0.14817	0.333542	0.18142	0.492713	0.354891	0.351868	0.320222	0.197127	0.15646	0.192474	0.243264	0.302205	0.391792	1.19085	1.8035	0.485763	0.265221	0.402447	0.481774	0.638103	0.334674	0.518651	0.133787	0.203032	0.261123	0.312477	0.178847	0.164464	0.602624	0.046034	0.312507	0.368947	0.420504	0.0960204	0.201885	0.73417	0.224325	0.762605	0.0939392	0.278692	0.387835
ADAMTSL2	13.1533	3.91757	8.17385	5.34872	7.9808	2.55826	7.25543	5.56814	7.99392	6.55988	9.07981	6.76228	2.37402	8.58617	1.79029	3.02461	7.54784	7.44478	3.66535	4.96272	7.13813	3.22405	7.36467	4.94715	7.65937	8.2779	7.55371	1.4202	4.52305	4.33788	5.19127	5.81742	10.7525	10.5825	5.5012	5.39924	5.78869	5.45144	5.05052	5.28124	7.20601	3.49757	6.79111	3.41459	3.48903	5.13396	11.9267	3.10657	2.73623
TPR	9.76427	10.1274	11.5329	7.20897	10.3728	8.89875	11.741	11.6043	10.1753	12.9064	11.6757	11.742	8.71404	9.95754	9.45974	3.4081	8.30031	11.7603	9.69909	13.7134	10.7426	4.47101	11.6406	11.297	9.86175	12.3643	10.0787	3.77491	8.03452	11.5671	10.8901	3.75389	10.1857	3.54896	7.27903	9.72849	10.4975	8.10292	11.6701	10.5355	10.3999	7.5808	4.1198	9.5443	9.8963	10.8906	10.8655	8.123	10.1241
TTPA	0.346976	0.354414	0.857448	0.379912	0.866457	0.939874	0.437499	0.578296	0.746502	0.5843	0.641331	0.762436	0.168801	0.832855	0.498542	0.381299	0.276321	0.468821	0.108586	0.826434	0.591112	0.27206	0.528072	0.303564	0.267194	1.11813	0.398462	0.324808	0.196518	0.513274	1.02336	0.216673	0.252543	0.195274	0.0717989	0.303659	1.15269	0.254408	0.474946	0.957333	0.20001	0.742922	0.282363	0.225136	0.559882	0.535083	0.613254	0.331734	0.4337
CES2	10.7565	9.99617	14.1494	9.19946	11.3975	9.8239	11.1372	8.2312	11.1787	15.4359	10.7507	10.7695	8.80047	12.1208	10.7876	6.36827	10.4606	11.4306	6.93078	7.90414	11.3176	9.24234	12.9291	9.44952	11.3783	10.6255	10.8306	5.56524	9.42261	10.849	10.8713	6.03687	11.8259	6.96003	8.89259	10.7068	10.5628	8.8784	8.27244	12.2889	12.5023	9.56127	8.92093	8.69587	12.8173	13.301	10.9732	10.6549	10.2672
SLC29A1	35.1144	24.875	25.6056	24.2611	18.4813	18.8952	20.1009	15.7581	20.6528	18.5585	22.4553	27.9705	17.6165	25.355	17.6288	17.612	21.8997	26.7348	17.9985	15.0547	20.7283	23.7386	22.6875	22.142	23.5642	19.5492	18.9882	15.0584	16.9113	13.2026	20.9264	18.1999	18.9915	19.5353	21.8953	21.5685	19.0958	14.7523	20.2013	22.4821	22.2975	21.5221	20.5835	22.5051	17.0656	17.1346	26.504	15.8717	21.5504
CSF1R	33.1659	24.7614	10.8691	12.9783	11.79	16.048	16.8685	13.4954	15.6882	18.7438	11.6396	19.947	39.99	17.9513	20.985	9.39874	25.4054	26.9173	11.025	12.1626	15.0925	25.735	21.5193	19.4225	15.9513	28.9159	28.1409	12.5577	17.0064	13.6448	12.4222	18.0697	29.8114	21.6756	38.0799	20.7027	7.1722	18.9732	20.2254	21.2557	14.0815	8.37287	16.3726	28.2568	8.49119	22.3821	22.0112	19.4308	17.2117
ZFAND2A	4.78482	5.16703	4.2994	5.96849	6.39629	3.99818	4.75014	5.04731	4.95635	4.27101	6.15933	5.48086	4.32556	6.4343	2.45251	10.7943	3.37638	3.3938	7.35438	4.98227	5.69889	7.10453	4.01399	4.51168	5.33944	4.47676	6.28011	8.43664	4.6976	4.43501	3.69592	6.25483	5.30653	8.36582	3.59585	5.028	4.32718	4.86278	4.98564	5.1956	3.35168	5.17435	7.37444	4.28061	4.16337	7.52777	3.1044	5.44325	3.52338
MAB21L2	0.0284795	0	0.0969907	0.0409275	0.0120442	0	0.0754101	0.0249197	0.0287214	0.010491	0.0417147	0.0149339	0	0.270133	0.01302	0.0773214	0.0907209	0.035651	0.0233958	0.0347438	0.1045	0.0260522	0.0413736	0.0249163	0.00921105	0.073188	0.149548	0.0447889	0.0697388	0.090482	0.0608254	0.0933681	0.0725498	0.0160279	0	0.0249241	0.0223242	0.0438514	0.0558169	0	0.0229834	0.0533562	0.0258883	0.0149254	0.0120631	0.0249271	0.0685122	0	0.0404083
CATSPER2	0.16441	0.386922	0.690189	0.141763	0.476781	0.327606	0.219742	0.197294	0.301295	0.456826	0.209854	0.743892	0.505503	0.0254606	0.32213	0.0669557	0.108486	0.329298	0.169793	0.280803	0.517092	0.130631	0.418552	0.423302	0.264355	0.603586	0.200988	0.217932	0.289213	0.215572	0.12708	0.0770012	0.170522	0.0740226	0.115053	0.661872	0.471319	0.144658	0.540115	0.687855	0.178172	0.158411	0.136641	0.147708	0.246723	0.353589	0.151749	0.373323	0.669831
HAO2-IT1	0	0	0	0	0	0	0	0	0	0	0	0.133109	0	0	0	0	0	0	0	0	0	0	0	0	0	0	0	0	0	0	0	0	0	0	0	0	0	0	0	0	0	0	0	0	0	0	0	0	0
CCL5	49.1319	71.5883	26.791	33.1087	25.5036	15.2876	35.4155	21.8989	60.1647	28.8311	33.3439	14.5656	15.9137	28.4836	44.3027	57.2871	40.4993	55.5344	21.5319	36.6576	58.5529	26.3457	18.255	69.6162	33.6725	71.1815	44.5174	66.9015	24.4567	23.5924	35.294	54.2197	49.9445	40.8004	27.5257	31.4376	23.5334	29.4243	56.2138	34.9826	37.5433	26.92	17.9501	53.6592	11.4338	45.7683	11.0174	29.3524	28.2622
ARHGEF11	9.22424	9.44136	9.52269	5.63136	8.26271	7.41637	9.00377	6.82027	9.35641	8.02899	8.58204	10.4949	9.14972	10.0638	7.89978	3.18808	7.26337	9.74261	6.12059	6.60717	10.5392	6.27439	9.36296	9.64252	8.68979	10.1741	9.19159	2.43801	7.39013	8.11144	9.77739	3.35449	9.10182	4.18232	7.41515	8.90446	7.88918	6.68898	9.19415	8.35378	7.70925	7.24148	5.56459	8.69529	7.99172	8.18367	9.51549	7.67056	8.61989
ASB13	8.59643	8.59383	8.41581	8.16032	7.51559	7.87139	7.93547	4.24018	7.22719	6.9725	8.66382	8.13324	12.8021	8.18591	7.89612	10.144	7.96599	7.36057	3.69294	4.66636	7.77724	11.4566	9.16585	5.49693	7.04858	7.01479	8.36959	9.5607	7.28349	4.69579	8.0196	7.35813	9.88212	10.719	9.44536	7.58076	6.86212	12.2447	5.13516	7.08975	8.45434	6.10723	12.5124	7.77038	7.20446	9.14633	8.34794	9.3907	7.50661
NFAM1	7.06055	8.00554	4.21697	2.42329	3.21411	9.21111	4.0667	5.26858	6.96108	4.66438	3.14577	10.7815	7.709	4.33996	9.0213	1.96206	7.98163	10.8956	7.25422	4.9587	5.35329	6.53017	7.5775	11.1789	5.60963	12.7125	7.96583	4.38607	8.18005	5.15497	3.28018	3.1757	9.17251	4.88823	10.98	5.13095	2.71276	7.66909	9.12334	9.81495	4.44118	7.74987	4.87545	26.8637	3.50083	7.86959	4.59876	6.51686	6.3689
DDX18	8.50689	9.09784	10.2328	10.054	9.38107	8.73857	9.60737	10.6521	10.0354	8.8862	11.5766	8.92687	7.68763	8.50221	8.56429	12.2613	8.9848	10.0197	10.221	11.9605	9.49165	7.9088	8.57735	10.3809	8.29637	10.0392	9.38701	10.0932	9.7015	10.7307	9.13088	7.82532	9.43294	8.67537	7.9407	7.44489	10.4044	8.80976	11.3352	9.12592	10.0503	8.94843	8.90105	7.87834	8.21173	10.5218	9.50322	7.9073	8.77789
TSPAN4	22.9125	16.9658	18.1641	22.6621	15.33	20.2818	17.6196	12.2245	20.7756	19.3625	13.9914	15.9818	13.1269	28.5993	12.8337	22.2233	17.8728	18.2276	16.7435	14.3286	22.3666	19.3122	12.5304	13.2969	19.2558	19.5317	22.3562	20.5755	15.3898	13.8317	16.0352	19.8621	17.7639	28.3493	13.8181	19.8776	19.4993	20.8577	16.9929	23.0234	19.2788	17.634	19.2497	14.1381	19.3958	18.5728	16.6984	20.013	19.9774
BBOX1	0.0640789	0.0962153	0.665079	0.0345326	0.50134	0.112348	0.155533	0.252312	0.0969348	0.625527	0.222913	0.151206	0.174574	0.164974	0.322245	0.1631	0.114819	0.0133691	0.0350937	0.214977	0.0587815	0.169991	0.581817	0.0140154	0.0310873	0.219564	0.205629	0.138566	0.381073	0.475031	0.0342143	0.0919093	0.153035	0.369644	0.0885989	0.112158	0.138131	0.0739993	0.0732597	0.185639	0.155138	0.0360154	0.337842	0.016791	0.379988	0.476731	0.0660653	0.201023	0.136378
LRRC46	1.35075	5.6086	55.6512	0.35202	22.1393	12.9523	1.70491	8.89188	4.1276	55.9347	2.11174	7.23711	7.68399	7.60188	8.01178	1.63411	3.8346	0.408849	1.41052	0.170762	3.64662	13.7058	37.8022	1.42055	0.235411	13.0455	9.67496	6.00962	4.2698	23.6783	1.51468	2.06503	6.71252	0.835021	0.282009	2.11924	7.27451	0.226301	2.00264	8.68526	9.39833	0.356647	6.47897	1.46713	28.6484	24.8459	0.384834	2.61127	0.297903
CRY1	6.39812	4.45594	6.57337	6.20821	8.66652	6.70218	5.29957	16.098	5.82255	7.49721	6.51607	6.73864	3.71241	5.50289	5.93205	8.20904	4.22898	6.26684	21.9337	9.99818	4.91423	5.56106	6.58174	6.85632	5.02893	7.57483	6.53636	4.93602	7.77978	9.54641	3.98593	5.03624	8.59139	6.90315	9.7867	3.84893	5.36676	6.48363	6.84166	4.48525	5.34272	9.54857	3.83337	3.89048	5.64802	7.1323	5.96535	4.39676	5.73114
MARK2	10.9746	9.25668	10.608	6.71508	9.56459	10.5935	9.55623	11.0302	9.92287	10.8971	7.96692	10.5073	8.62364	10.7946	9.26037	3.82243	8.97991	11.8887	8.25857	7.1755	10.2379	7.6676	10.6941	9.42195	8.60091	11.901	9.41327	3.79788	9.73805	10.5061	10.5391	5.35171	10.3614	5.65295	11.2656	10.3623	8.47192	9.21448	8.46451	10.6492	9.77285	8.30605	7.43045	10.6021	11.5194	10.1671	9.34192	10.3883	9.91524
BNC2	1.1077	0.539303	0.747796	0.936603	0.749525	0.411503	1.12092	0.709272	0.882253	2.72724	1.32816	0.745646	0.340376	0.825175	0.405124	0.757089	0.761098	1.26839	0.876108	0.719668	0.815261	0.205485	0.905646	0.764018	0.501563	1.00404	1.81662	0.447664	0.48662	0.256442	0.65288	0.36315	0.855559	0.653843	0.379583	0.719167	0.545205	0.573153	0.760681	0.947105	0.962529	0.411191	0.291302	0.494112	0.56739	0.520839	1.27306	0.543066	0.615871
CHI3L1	49.445	12.1936	8.85074	8.80511	8.474	7.91071	3.84379	11.9115	9.33056	7.63721	14.3948	23.5408	30.2213	9.80582	28.7418	8.96993	17.2578	3.16077	17.8054	14.9636	7.84112	12.1548	4.92448	38.9521	42.6899	13.801	10.4205	6.29335	18.6379	10.6388	13.4487	32.9691	15.3981	9.45168	32.1111	9.34575	20.9	5.3056	9.08764	15.2154	32.9485	18.4272	10.0989	85.235	4.43498	7.21798	18.7798	108.085	13.9932
PRKCE	3.70703	5.61615	11.4486	3.3693	11.221	4.10711	9.20919	9.25169	11.4972	4.10329	6.60852	4.72128	3.37277	8.44293	3.50787	6.97378	5.42526	4.92727	9.63066	12.7094	9.02311	5.74061	6.76188	8.48712	9.42156	6.5114	5.56623	3.64958	5.28193	8.45786	7.3118	6.67416	8.13043	8.86974	3.667	3.20415	8.2756	4.18662	6.75657	4.98174	8.60996	8.55057	5.21921	2.91048	6.79714	7.76201	6.81556	2.44628	3.38025
TRAM1L1	1.91217	1.4565	1.51254	1.76654	1.15524	1.98416	1.36051	0.375606	1.1413	1.85441	1.65762	1.3301	0.770785	1.72383	1.05259	1.35085	1.28971	1.1887	0.352637	1.19018	1.5751	0.528328	1.29447	0.97303	1.02233	1.38728	1.48755	2.80775	1.07845	0.633687	1.31964	0.943535	1.02517	1.35067	0.285198	0.887954	1.19299	0.555805	0.905045	1.25386	1.55889	0.994309	1.26994	1.10437	1.43806	0.768514	1.13995	0.963056	1.55033
CXCL3	3.88678	10.3786	15.4683	2.88868	12.7889	7.41582	1.97827	9.97197	3.04973	1.4285	1.48515	13.3015	4.05872	2.34289	13.9226	0.664061	2.13909	5.07707	6.18623	9.3749	10.9983	18.6742	1.80895	10.3649	3.47498	3.36757	1.57757	0.209815	6.38454	8.22616	44.4885	8.07708	2.33372	2.45273	3.91416	10.5394	13.9299	0.931255	93.783	1.78026	1.06231	12.2908	8.53128	16.7618	1.79326	2.13304	34.9069	3.03577	5.84288
MRPL52	6.39449	6.89372	6.68629	7.75938	5.4761	7.24683	4.90117	4.80152	5.82808	8.16407	3.92282	6.66112	7.6478	7.05826	5.91975	11.0903	6.8681	5.15705	4.60882	5.69525	7.47178	10.5774	5.71713	5.78254	6.92166	6.89307	6.86684	11.2446	6.05966	6.62668	5.10775	9.20317	5.44941	13.2887	5.67342	6.47245	5.61432	5.64651	6.31643	6.58754	5.79992	6.12236	8.92953	5.9362	7.42047	6.78506	5.53931	9.75329	6.02242
PTP4A2	29.9252	31.3136	31.3868	34.943	31.554	32.925	32.51	39.8467	35.2186	32.7259	34.7969	30.1448	29.1586	32.7588	36.95	43.831	33.478	31.7993	35.104	35.8223	33.5687	30.9192	29.8385	34.722	32.1396	33.5027	31.3566	41.7533	35.0328	32.5139	32.1739	31.7081	29.2155	33.576	29.1598	36.586	32.1923	33.1156	32.0348	28.1984	35.0053	41.7607	30.131	29.9217	32.321	33.4638	28.8057	28.7699	29.4878
COL13A1	2.86401	1.38152	3.76238	1.78221	3.17001	2.72826	4.57794	3.39732	3.83361	1.93336	3.3018	3.30542	0.676661	4.9689	1.24043	1.32541	2.32992	4.62017	3.00944	2.959	2.46382	0.917595	4.48585	3.1291	2.2958	3.33962	4.65326	0.797383	2.6653	1.44156	3.04378	1.56117	3.40795	1.35733	1.4481	1.50508	2.32557	2.36846	4.21658	5.58675	1.53718	1.21691	2.11513	1.65895	2.59455	3.31637	2.99988	1.51895	1.85682
PLSCR4	16.3559	12.0104	19.972	17.2176	16.6972	11.2315	20.1932	11.2433	19.8785	15.3489	28.6142	16.7272	4.85281	16.4343	7.83816	17.0499	13.1629	18.4619	11.6297	23.7869	15.1965	6.63226	18.4454	18.178	9.70098	17.6544	21.4268	11.0365	11.9169	13.5881	18.1625	11.7484	18.225	19.3873	6.11637	9.21032	15.2035	9.76302	20.5226	16.3794	14.4165	11.4348	10.8042	9.77804	10.1575	14.189	18.1321	6.88239	15.2171
AHSP	0	0.120526	0.136684	0.504676	0.297033	0	0.123984	0	0.198331	0.0517458	0.154315	0	0.143511	0.26648	0.0642196	0.381379	0.111868	0.11723	0.576985	0	0	0.591098	0.272094	0.0614485	0	0.0601653	0.300516	0	0.491398	0.545468	0.250012	1.55428	0.0894609	0.553391	0.0554926	0.0614676	0.220223	0.054073	0.18354	0.0739912	0.113363	0.263173	0.127691	0.147235	0	0	0.193102	0	0
GAD2	0	0	0	0	0	0	0	0	0.00259166	0.00473325	0	0	0	0	0	0	0	0	0	0.00783771	0	0	0.00622221	0	0	0.0055034	0.00249896	0	0	0	0	0	0	0	0	0	0	0	0.00419717	0	0	0	0	0	0.0108851	0	0	0	0
SP140	1.18093	1.05571	0.807341	0.757086	0.663903	0.79899	0.84883	0.907502	1.17527	0.739792	0.844151	0.897352	1.53158	1.06934	1.18322	0.638358	1.62749	1.04455	0.991425	1.5442	1.27142	1.25493	1.10263	2.30763	1.45001	1.87176	1.10848	0.928603	1.1577	0.863713	1.40456	1.01426	1.53119	0.94717	1.01125	2.04224	0.703969	1.1596	1.1226	1.09508	0.99297	0.853187	1.10562	2.23098	0.964469	1.42355	0.685318	2.40177	0.857847
VMO1	10.3474	11.0503	13.9826	10.2431	9.93697	9.09727	5.11963	9.86411	12.9091	4.78046	7.30807	10.6199	35.3214	7.93968	21.6189	11.5442	8.61227	7.13802	4.71121	12.8333	5.81695	31.6207	6.71273	5.63382	4.76956	5.26352	8.71887	20.7569	14.8916	7.39226	9.2038	12.9731	18.1417	11.7021	9.34051	6.49597	5.31745	16.6894	7.61098	9.16588	8.33068	3.20488	12.6366	12.3656	11.6183	20.8671	9.79818	37.0103	6.97458
MACROD1	5.09232	5.69057	7.30537	4.05958	6.84033	5.9632	4.15272	5.07031	5.97595	6.29232	3.93009	7.31232	4.42712	6.8106	4.75114	5.47636	4.77014	5.61379	4.47049	3.11197	6.04934	5.89764	6.8077	3.91794	7.12578	5.17957	6.16644	6.18099	4.8253	5.72311	4.35847	5.17261	4.90375	5.51912	4.56083	6.54847	5.42103	5.17879	3.80207	6.76795	4.65091	6.47122	8.5469	6.13962	7.77947	7.26041	4.01313	6.21226	5.88477
HLA-DMA	94.0706	118.604	70.5719	72.7314	54.375	93.325	82.2729	90.304	86.2075	62.2478	70.799	91.5827	160.087	84.1512	121.662	91.308	90.4091	71.4601	53.0632	76.3941	96.9251	162.359	58.5508	115.023	107.19	88.4552	77.9436	141.389	80.8117	62.8415	82.9955	132.689	89.2447	98.5898	118.083	99.6674	79.6978	98.7703	83.977	89.205	79.7002	97.1937	144.618	167.501	65.8486	77.7284	76.1033	123.068	95.0707
ZNF792	2.28874	1.5758	2.24971	1.47374	1.46667	1.75803	2.69895	1.16924	2.99734	2.06054	2.43747	1.75013	1.40962	3.41585	0.946184	1.80975	2.15307	1.79724	0.75565	1.60365	2.93335	0.910811	2.17601	1.84334	1.79105	2.65935	2.86113	1.34887	1.17406	0.993892	1.60617	1.20728	1.98009	1.75766	1.09751	1.16672	1.03771	1.48572	1.547	1.85621	2.73107	0.887281	1.6305	1.20191	1.18466	1.79518	1.97362	1.83279	1.75266
QKI	12.0784	15.3524	15.3098	12.9599	17.6467	13.7508	18.7377	14.4614	21.5074	8.02376	18.324	15.9409	10.8789	17.7495	11.1134	14.0407	12.0342	17.6088	14.2703	24.4739	17.4042	10.1082	13.6074	18.7563	16.8887	19.1122	13.1931	13.23	12.0433	13.1881	17.7494	14.3543	13.6917	13.8087	8.68465	13.3581	16.7587	10.8132	17.7964	13.3646	18.3026	17.9003	11.1015	12.8302	13.5369	17.9986	18.3439	8.782	13.2372
EIF2D	6.87246	7.20279	6.66494	7.5409	5.26219	5.48112	6.0658	4.56576	5.56442	6.84834	6.70368	6.12944	5.31088	7.13946	5.20514	8.1565	5.85504	5.35137	4.40182	4.61006	5.85529	6.53569	6.24591	5.6272	5.63918	6.47409	7.11514	7.00911	5.00345	5.08019	5.58612	5.78919	4.9878	6.34706	4.36438	6.12588	6.66483	5.18166	5.76251	6.6108	5.85824	4.48626	7.44143	5.05364	6.0832	5.32544	5.86085	5.6387	5.7124
AKR1D1P1	0	0	0	0	0	0.0164307	0	0.0246002	0	0	0	0	0.0287227	0	0.0385592	0	0	0	0	0	0	0	0.0204216	0.0368953	0	0.0361249	0.0328069	0	0.0295049	0	0.0300228	0	0	0	0	0.0369068	0	0	0	0	0	0	0	0	0	0.0369113	0	0	0.0299177
FABP6	0.915601	4.74266	30.2581	0.2924	11.9033	12.0761	1.67613	6.17187	2.90009	43.097	2.30968	6.50827	2.21727	8.49164	4.15485	2.20964	3.80782	0.452805	1.5229	0.12411	3.2041	3.67288	16.208	1.39442	0.263227	9.93471	8.91671	10.5329	3.48766	10.319	1.15882	1.13955	3.56345	0.47712	0.0937748	0.979363	5.31639	0.130537	2.03818	4.92995	6.15753	0.381194	2.61402	1.74165	18.6155	18.9663	0.53609	1.81561	0.168402
SSUH2	0.00314322	0.0539382	0.417992	0.0858246	0.0797577	0.0538847	0.0166457	0.106346	0.0557907	0.2501	0.0276238	0.0395574	0.072788	0.0749609	0.0344877	0.0213345	0.00500634	0.0209852	0.0206572	0.0536844	0.0692009	0.0851097	0.11568	0.0659991	0.0447306	0.0323104	0.0146714	0.00494325	0.0703719	0.102082	0	0.0309145	0.0440394	0.212276	0.0248342	0.0550164	0.0886996	0.0435581	0.0739247	0.0397354	0.0507325	0.0471105	0.0182863	0.0131783	0.0905338	0.165069	0.00432088	0.0210361	0.0178391
GRHL3	0.100184	0.0601712	0.194966	0.0431921	0.06779	0.0663568	0.0265275	0.0350647	0.0969939	0.51667	0.0953826	0.0105068	0.0818816	0.0651609	0.0549615	0.0203999	0.119676	0.0250824	0.0274337	0	0.0643314	0.0806482	0.106731	0.0788849	0.0453633	0.163057	0.229915	0.0630227	0.0280371	0.0848786	0.0356616	0.0985342	0.0638033	0.022553	0.0712389	0.0438386	0.141357	0	0.0327251	0.0422163	0.0485101	0.0600623	0.0546414	0.105008	0.186715	0.157838	0.041316	0.0335243	0.042644
PEA15	111.616	69.8116	85.8598	104.87	90.7006	51.3443	89.2343	96.7478	96.3448	63.6862	90.1246	94.1092	68.2363	112.615	75.99	126.856	91.2012	82.4478	130.793	108.614	97.8402	62.1692	80.0757	99.9223	88.9107	85.448	85.7691	102.441	74.484	75.5309	81.6001	124.658	101.611	171.938	85.3859	77.5227	79.0846	77.2613	115.483	70.214	102.66	89.986	69.2765	68.8422	62.2422	75.3404	93.0144	67.3138	59.0496
RUNX2	0.893819	0.768971	1.06429	0.543574	0.660232	0.497495	0.450804	0.668963	0.715298	0.976234	1.23862	0.773159	0.538214	0.621569	0.73575	0.552713	0.683031	0.71175	0.569998	0.834716	0.786776	0.398462	1.36266	1.50075	0.991151	1.11444	0.627864	0.82598	0.852904	1.05799	0.50769	0.837236	1.53433	0.745733	0.690968	0.805427	0.81206	0.682566	0.953807	0.802017	0.606612	0.339427	0.41873	1.35352	0.632695	1.15979	0.394112	0.552238	0.765705
VTI1A	2.11024	2.20737	2.05715	2.10494	2.12438	1.99007	2.23341	2.29491	1.88813	2.21014	2.35516	2.15157	2.35974	1.78881	1.87153	1.59324	1.85812	2.14308	2.46567	2.11909	2.14035	1.88787	2.18927	2.50955	1.97996	2.26009	1.90825	1.44709	1.93132	2.25387	2.03207	1.90465	1.93143	1.70943	2.31453	1.95157	2.10864	1.74932	2.30639	1.97332	1.97388	1.88925	1.54313	2.29796	1.6624	1.76279	2.18453	1.96762	1.87841
NFXL1	1.81342	1.94113	2.25276	1.22079	1.69018	2.07159	2.12114	1.17594	2.17328	2.11428	2.62392	1.99414	1.57685	2.06597	1.78686	1.33242	1.71055	2.30679	1.25348	1.51424	2.21262	1.10805	2.22094	2.22577	1.60578	2.38289	1.64699	1.32212	1.30569	2.25608	2.14332	1.06782	1.80242	1.12461	1.56838	1.75652	1.86311	1.59942	1.97834	1.88255	1.96784	1.25342	1.27072	1.62392	1.84943	1.74902	1.86963	1.66433	1.8423
CDC23	6.31664	6.13845	6.31822	5.99439	5.87771	5.99115	6.66914	4.19331	6.92026	5.62352	7.3241	6.7411	6.32233	7.12533	6.72122	5.66818	6.00378	6.24877	3.98369	6.65284	5.98263	4.7102	6.0887	7.64266	6.05428	6.95587	6.13746	6.23059	4.85592	5.82353	6.48071	5.75163	5.65045	5.91206	4.74083	6.23123	6.70017	5.90276	6.04759	6.7174	6.11852	5.74575	4.9727	5.87717	5.9521	6.3068	5.59889	5.77052	6.28823
NUPR1	27.4374	26.9378	29.2045	17.8105	21.5948	29.6389	18.3039	14.2562	25.0129	14.2433	21.2252	25.5575	27.581	35.6588	24.8073	21.867	21.7229	17.51	13.1291	17.5934	24.1098	28.5227	20.8832	22.0813	35.1181	25.8453	21.2229	24.343	17.1277	17.1464	19.6075	31.5595	16.4371	32.7622	14.9201	22.4474	23.0343	18.633	26.7191	23.4006	20.3964	24.7687	34.6215	32.3898	21.4518	23.0286	18.9447	34.4298	22.1003
THAP10	0.987226	0.917635	2.50826	0.922175	1.51694	1.37188	1.39416	0.518297	1.20137	1.28495	1.12066	1.43224	0.818076	1.48932	1.12833	1.85388	1.2055	1.26329	0.71188	1.32481	1.28295	1.19809	1.76884	1.00766	0.585376	1.24032	1.0816	1.78547	0.67919	1.26622	0.995671	0.997938	0.974523	1.72236	0.519997	0.806382	1.12209	0.886716	1.3759	1.26535	1.06227	0.986434	1.39397	0.724332	1.32418	1.58415	0.961284	0.922232	0.863783
HOXB3	1.6491	0.863047	1.6055	0.844493	0.931385	0.942634	1.79431	0.429263	1.60385	1.64595	0.969296	1.87107	0.814899	1.33142	0.343681	0.618052	0.85164	2.05001	0.478396	0.826693	1.63661	0.470726	2.06631	1.29225	0.862973	1.93644	1.88832	0.582808	0.596334	0.598036	1.18345	0.525027	0.750177	1.11133	0.221687	0.917365	1.12461	0.729565	1.47683	2.28662	0.863023	0.503856	0.85468	0.871189	0.690665	0.97308	1.11347	0.79719	1.06663
HLTF	3.92826	4.66638	4.58639	4.46347	4.23429	4.3605	4.09468	3.21459	4.65218	5.12685	4.6069	5.0028	3.65511	4.63832	4.28975	4.26962	3.90326	4.57157	2.06344	5.27593	4.23164	2.48635	5.88606	5.22826	4.31061	5.09102	4.74576	5.49772	3.09449	4.16362	5.38796	3.16324	3.56797	4.27404	2.36852	3.84214	5.03876	2.66358	5.08128	4.31431	4.73276	3.08378	3.09493	3.82551	3.91897	4.26127	4.57134	3.71655	4.46727
MITF	4.73858	5.28758	4.15071	5.37051	4.41874	5.07579	5.76864	5.09301	4.53809	3.65485	7.18588	3.71208	6.08479	3.63763	4.19469	3.57572	4.20412	5.03764	4.07229	4.94737	3.71004	4.55408	4.7647	4.11451	4.2916	4.81362	5.35125	5.15226	4.99118	4.06811	5.30929	3.90402	6.17716	3.7215	4.09725	3.52988	4.13813	3.7812	4.06188	3.91377	4.32674	4.05074	4.44162	4.84882	4.1421	4.08267	4.95996	3.88379	4.80017
NINJ1	29.7088	22.1778	18.1792	22.5681	12.52	20.0254	17.1566	40.9995	16.9454	26.5113	13.8865	17.6812	19.9704	17.3063	20.0493	16.4313	22.3296	18.9215	16.8011	15.4394	15.8758	30.5449	16.4871	17.6713	24.6363	23.3293	22.9841	17.2893	17.9383	13.3343	15.3984	21.3074	20.539	27.7516	24.2263	23.743	14.571	16.5717	20.5871	19.2526	19.38	30.7648	19.301	25.4676	15.5703	15.3696	17.2129	19.0297	22.176
PSG9	0	0	0.00253621	0	0	0	0	0	0	0	0	0	0	0	0	0	0	0	0	0	0	0	0	0	0	0	0	0	0	0	0	0	0	0	0	0	0	0	0	0	0	0	0	0	0	0	0	0	0
RPL27	188.927	238.546	162.366	308.785	152.86	222.246	155.454	165.556	170.581	208.491	181.226	155.943	173.263	210.08	178.622	767.786	201.611	150.042	139.085	176.172	160.172	406.36	144.765	177.392	209.52	166.995	214.633	736.104	179.603	158.325	169.385	509.281	153.784	514.491	156.565	165.972	197.942	199.569	227.263	174.604	180.454	179.776	420.989	191.979	166.485	184.75	176.029	264.285	157.292
KIAA0825	0.178129	0.289413	0.715431	0.190628	0.426348	0.289421	0.277645	0.278565	0.359284	0.541693	0.274788	0.262332	0.203924	0.168445	0.287622	0.218657	0.199203	0.265683	0.203412	0.351394	0.201646	0.349469	0.475342	0.344843	0.161803	0.321409	0.241766	0.274177	0.26251	0.51643	0.30759	0.270248	0.382569	0.285816	0.167687	0.185743	0.305997	0.239261	0.430822	0.231572	0.397613	0.227216	0.220489	0.282044	0.410963	0.534074	0.221423	0.187063	0.215097
CEMIP	4.67704	1.06212	0.910524	1.83106	3.7325	0.431852	1.56803	1.22969	2.01834	1.61032	3.87669	5.16035	1.88731	2.1897	0.937685	1.86675	2.15725	3.55307	3.57695	1.61759	1.86725	0.822519	1.08854	4.63565	6.73086	1.60612	1.21483	0.329895	0.840709	1.06047	1.80312	0.849024	2.70319	8.40958	1.49775	3.02794	1.07184	0.474517	4.48683	2.03523	3.26031	1.12563	0.728829	2.43212	0.772242	1.37815	3.00465	3.32337	1.06191
CX3CL1	20.3894	14.2422	45.9706	19.6449	78.8432	17.1888	23.7349	86.3881	36.8444	16.2199	28.9566	21.5737	8.61399	38.5802	11.1477	32.8461	26.7429	21.7096	69.3046	42.7221	54.6016	19.7953	20.3063	35.169	36.3301	37.0342	24.0043	10.1785	42.2072	35.0883	33.8221	35.4775	29.9578	35.7002	30.8454	15.139	35.8543	10.8949	72.3366	25.1667	35.3423	136.73	17.3175	20.0608	10.049	31.6502	24.0563	5.91107	11.9257
CLEC3B	85.7859	76.7159	120.056	64.2975	160.83	50.3685	142.416	50.3025	132.933	51.767	116.784	119.882	52.0171	205.562	29.7876	260.063	102.412	85.6481	148.389	144.116	145.231	69.9424	93.2551	78.6314	84.8252	93.1766	114.131	129.267	77.0265	75.9384	108.286	192.473	106.094	113.385	49.1228	83.9392	101.224	97.4649	174.491	105.971	106.606	169.159	128.822	27.3699	60.9769	96.1744	114.121	39.4763	51.4443
SPDEF	1.69109	2.76038	2.8629	1.74859	1.18615	3.16583	1.03754	1.07069	1.53907	1.86885	0.921319	1.14631	5.25328	0.894232	3.62045	0.6439	4.64788	2.01367	0.59861	0.553504	1.55129	8.37624	3.81493	1.28104	1.961	1.28962	2.55894	3.03251	2.68374	1.71812	1.40947	1.14939	2.82381	2.06594	1.0917	2.9419	1.82674	1.11141	1.02395	1.65116	2.01382	0.772745	3.64436	1.72929	3.26702	2.76175	1.24739	3.32974	2.09217
METTL4	1.80675	1.52062	1.69093	2.01671	1.90147	1.63894	1.58251	1.69757	1.70804	1.97126	1.55551	2.35768	1.52176	1.77914	1.797	2.36371	1.29605	1.68621	1.25763	2.13685	1.76492	1.78397	1.59622	2.59428	1.26684	1.89621	1.70328	1.45867	1.59697	1.74787	1.51209	1.1304	1.40976	1.73092	1.13055	1.55705	1.71896	1.32195	2.48684	1.49653	1.74189	1.15243	1.59973	1.68413	1.41958	1.6176	1.47409	1.49415	1.64867
TPD52L1	2.52583	2.33663	1.8138	3.56262	1.52536	2.00263	1.28899	1.69169	2.2957	2.71092	3.82906	3.30303	1.58581	3.04509	2.55657	4.25072	1.43619	2.8279	1.52847	1.35683	1.61143	1.64116	2.09896	2.63723	2.09778	1.40238	2.96561	3.5391	1.39992	1.55946	1.70569	1.71238	2.21596	4.1095	1.81495	2.3697	2.99433	1.70851	2.81132	2.6116	2.6759	1.75264	1.65351	2.18986	2.03848	1.05535	2.40051	2.81301	2.86482
NFIB	10.9118	8.07879	14.5696	11.3273	14.607	9.08796	13.513	8.97687	14.077	16.1835	18.0065	17.7218	5.13193	10.8784	5.90081	9.85902	9.86934	12.1001	11.216	14.3081	10.9758	3.60466	12.4552	10.7833	9.45164	14.1053	12.3001	15.1031	8.85968	10.1783	9.59252	11.1789	12.3505	8.64164	4.87201	8.66084	12.1482	8.59009	11.6306	10.6074	16.182	9.05933	5.27604	8.99553	10.629	11.2414	11.9423	6.93782	9.59088
GJA5	49.3347	29.2177	35.5888	22.9349	36.7638	7.92317	20.3195	15.0941	59.0298	6.21905	18.9063	17.8565	10.0694	54.8121	7.53183	30.5681	32.3992	17.4514	21.1974	40.3582	57.5698	17.9006	14.5334	40.9541	38.6641	23.2232	11.0208	10.4939	10.8805	28.3425	23.9783	14.0926	22.4315	59.228	10.4967	21.5118	30.9508	11.8067	47.8618	13.1368	35.8707	24.5937	18.2327	13.7115	18.2228	22.1756	42.3692	16.0794	10.4883
CBR1	20.5419	21.2054	22.7262	20.5833	18.4784	29.1702	16.3674	11.3061	19.6667	23.2649	16.8612	14.4804	28.9584	27.2278	15.4383	26.0482	20.6828	16.6321	9.4765	14.1516	18.3855	34.5579	16.9535	17.0274	30.2957	21.9853	20.8684	29.4171	16.322	14.1617	20.8982	19.4376	17.443	29.4594	11.1572	17.5121	19.613	17.9233	13.9042	18.3644	18.8789	21.5637	24.2059	18.2042	20.0907	20.5602	11.6496	27.6167	16.5046
NDUFV1	20.601	18.8988	23.1307	17.8957	22.0621	20.2365	16.5559	16.2577	19.2581	23.6275	16.7089	24.3059	23.2537	23.6967	18.3498	16.4079	20.1292	17.8348	15.7007	15.2556	21.6263	20.1804	19.6944	18.1566	23.2526	20.6426	22.014	17.7161	19.6188	17.8992	17.149	20.0078	17.462	20.9633	20.7737	25.2807	19.9473	18.2451	17.4751	23.4143	17.2771	18.2156	21.6807	21.0451	20.9054	19.0793	17.2098	24.8734	18.3765
HMG20B	13.5908	10.1946	13.0517	9.94205	10.7682	11.9182	8.80697	8.27425	11.159	13.6848	8.43189	13.6093	15.3068	14.239	9.0673	10.7529	11.7035	9.67664	8.08212	7.6034	12.8052	13.0353	12.0179	9.63408	11.3068	11.7034	12.5512	12.1274	10.3392	10.3902	10.0981	11.7934	11.0506	16.1556	10.374	14.1421	9.58645	10.3687	9.80818	12.517	11.8186	10.3766	13.4333	12.6254	11.8428	12.3882	10.0659	12.5425	10.3459
FAM84B	9.40798	9.75172	13.8736	12.1082	13.0235	13.424	13.1003	21.2788	15.6285	14.5513	10.9717	13.0687	6.16392	12.5342	15.6013	7.28794	13.9665	15.3065	9.11272	13.3754	17.763	10.1857	11.2339	12.6084	8.70316	13.3525	9.52073	9.30471	11.3195	12.4232	17.7895	7.68092	8.4361	7.96671	8.05063	13.9483	14.6061	7.49603	12.0443	13.997	17.4129	12.8198	12.9156	10.3509	12.4066	11.2585	14.0574	9.77688	12.9184
SCGB2A2	0	0	0	0	0	0	0	0	0	0.0192846	0	0	0	0	0	0	0	0	0	0	0	0	0	0	0.0169317	0	0	0	0	0	0	0	0	0	0	0	0	0	0	0	0	0	0	0	0	0	0.0179913	0	0
TECR	15.2665	16.4714	15.3905	15.6787	14.5358	14.4509	12.5686	12.9247	12.81	18.4786	12.1436	12.0756	18.6634	17.9782	15.0669	12.9602	17.355	12.073	10.9912	10.42	13.3463	18.0711	15.1048	11.0108	15.8021	12.6923	14.9423	10.9707	13.2967	14.8092	13.6083	17.5069	14.373	15.6612	16.6784	14.8719	15.2581	17.7714	11.3753	14.647	12.7885	12.709	19.7025	13.2201	18.3335	15.4806	12.0199	19.0236	13.4048
VEPH1	10.356	21.8792	7.9192	14.2074	12.1494	16.8411	16.3725	12.6758	13.7706	6.90421	23.6153	10.2639	12.909	12.0291	18.6239	10.8001	16.8205	9.61005	6.93654	16.6933	11.939	9.55765	11.001	13.6102	19.8335	15.3123	9.3518	11.6028	15.2283	13.4708	16.0058	13.4858	6.82161	9.57869	7.82288	19.4071	26.7161	13.4511	8.11709	8.86987	18.8291	13.1791	12.0049	11.7731	13.9644	12.1823	14.65	11.6033	16.3514
CCT3	35.5725	32.3169	31.7616	33.057	28.2681	26.4791	27.7988	31.5416	24.709	44.4178	26.0592	30.9188	31.8626	32.2515	31.4475	38.9742	31.2392	27.7847	28.3753	26.4624	27.1165	31.3311	31.5739	29.6436	31.068	31.5912	35.7627	37.8829	28.2214	35.8656	27.1222	34.2201	30.2813	40.034	37.307	27.8731	31.0184	29.9504	28.6113	28.5431	32.291	24.8248	33.37	27.5135	31.9326	31.7201	26.1517	32.6516	23.7446
CXCL17	116.791	239.638	134.768	187.71	135.568	176.66	137.658	196.852	117.247	274.693	162.679	139.162	201.893	173.297	362.735	156.673	177.505	138.693	151.015	172.41	158.085	199.534	137.516	159.891	211.115	110.084	114.009	235.388	213.802	221.846	189.17	219.853	141.19	159.894	205.6	207.356	232.281	248.812	122.713	202.215	136.904	153.426	198.206	227.57	267.99	181.375	117.149	328.492	327.156
NISCH	12.4394	14.0225	16.2952	7.80511	13.3933	11.9209	11.2836	9.66928	13.4046	15.8119	11.4137	17.3025	10.8113	15.5957	10.8578	4.46287	10.4348	12.5207	7.9335	9.48274	16.3438	7.56144	13.3621	12.406	14.2479	16.1664	12.5212	4.14369	9.97826	11.2405	12.1749	6.2331	11.7213	5.44637	8.90906	14.6196	15.2663	9.08254	11.361	17.689	11.7148	10.5781	8.09667	11.0602	13.0018	12.2832	11.7337	12.2375	13.5934
IL1F10	0	0	0	0	0	0	0	0	0.0199413	0	0	0.0518432	0	0	0	0.0167764	0	0	0.175974	0	0	0.00904405	0	0	0	0	0	0	0	0	0	0.0810321	0	0	0	0	0.0193747	0	0	0	0	0	0	0.0259068	0	0	0	0	0
CXCL14	7.65469	1.81771	2.06141	3.51842	4.73328	0.747545	1.97571	1.84206	1.16904	27.3289	1.97601	3.0183	0.775906	3.35813	0.730965	2.23831	11.0619	5.67095	4.9365	1.63361	3.11676	2.25243	4.47137	4.4938	0.517125	3.08168	5.66724	7.52786	1.99958	0.945411	0.426856	0.769897	3.94579	5.10657	3.31607	7.11885	1.87998	1.07708	0.626732	2.50551	7.64518	0.254619	1.34441	7.18531	0.389415	0.909644	0.851702	9.31287	5.10433
BHMT	0.0056085	0.0288728	0.0181909	0.0564193	0.0284625	0.00874065	0	0.0588895	0.0226246	0.0165281	0.0328597	0.0235276	0.0076398	0.0303986	0.0102561	0.0609079	0.00893287	0.0280832	0.00614314	0	0.0514484	0.020522	0.0162955	0.0294408	0.0435346	0.028826	0.0174523	0.0441016	0	0.00791943	0	0	0.0250028	0.70072	0.0265872	0	0	0.0172714	0.0293122	0.0236335	0.0271568	0.016812	0.387464	0.0235141	0.0285072	0.0490892	0.0539687	0.00938375	0.0318305
S1PR3	1.23549	0.835669	1.36744	1.58111	2.09763	1.14193	2.89334	3.38785	2.01904	3.31872	1.45961	1.6362	0.746278	1.51526	1.56668	2.19746	2.74345	3.87216	3.29427	1.57876	1.36499	1.13844	3.02856	2.1066	0.974187	1.87334	2.76765	1.81892	1.76981	1.16198	1.91002	1.00153	2.2801	3.09087	1.69223	1.55085	1.87331	0.715118	1.20483	1.3348	1.66298	1.68279	1.76906	1.43676	0.733411	1.21162	2.0796	1.62957	1.34033
MESP1	0.374898	0.34311	0.345875	0.275367	0.267769	0.38951	0.161771	0.145794	0.120986	0.601509	0.207446	0.332013	0.419892	0.460583	0.243758	0.53154	0.490961	0.0695263	0.118628	0.0609813	0.45854	0.597488	0.314677	0.11662	0.247894	0.214096	0.24628	0.668203	0.198177	0.352914	0.177932	0.273128	0.270592	0.403222	0.184304	0.29164	0.27428	0.307867	0.195936	0.52659	0.349611	0.112379	0.642196	0.331823	0.465802	0.364595	0.194691	0.66907	0.602849
HLA-DPB1	306.878	323.692	186.445	225.48	182.28	290.485	194.582	222.85	268.788	174.341	206.719	229.233	296.683	271.391	360.953	263.484	280.097	237.991	172.407	235.909	246.2	335.908	198.591	370.929	291.027	317.012	272.872	489.134	277.511	192.463	239.581	342.218	324.625	353.867	341.602	242.358	200.016	340.91	297.669	285.569	214.482	243.831	391.523	492.727	167.326	252.625	219.778	294.105	257.113
DNAJB6	5.28945	4.86958	5.59422	5.3295	5.49794	5.24479	5.06046	5.05827	5.24855	4.93065	4.97081	5.90791	4.78612	7.8289	4.6111	6.44357	4.82821	5.07284	5.16164	5.77948	5.32228	5.11075	5.66	6.04651	4.81141	5.51623	5.4472	5.62305	5.03075	5.20499	4.54319	4.88704	4.69679	6.46526	4.64649	4.44118	4.60578	4.37548	5.62362	4.76036	4.48236	5.76568	4.42138	4.69214	4.91283	5.56944	5.05273	4.10205	4.3796
TCF21	15.5124	8.55067	13.3823	9.52905	9.19213	10.0838	19.7125	7.51336	11.7001	4.61362	16.6805	12.3617	6.4922	15.2079	4.44897	11.9271	16.9572	19.1164	10.7495	8.68713	14.3533	6.10613	20.7233	16.1022	11.9783	15.3202	18.5957	5.73578	7.65812	7.54427	18.7342	11.502	14.8588	14.4047	6.43815	5.29065	6.98237	13.3883	14.1148	16.3737	5.87262	5.66134	17.0331	6.70916	9.25798	11.1292	15.4403	6.03687	6.78076
MBNL1	22.7672	25.4051	20.0033	24.6545	24.0381	23.5022	29.9182	31.965	26.8601	29.2354	34.0278	23.5849	23.0277	20.722	23.1926	26.8777	22.0349	27.487	36.256	32.2993	22.6159	21.9983	23.8985	27.6784	18.5191	32.3573	24.4238	28.0743	24.8215	24.0323	25.4428	21.8746	25.862	23.5757	24.2292	22.7936	25.3627	21.8677	26.1411	22.5795	28.988	24.9048	16.7405	26.305	22.2949	26.0371	25.2757	21.0975	26.8003
OSGIN1	3.41678	3.52382	3.3635	2.35264	4.74745	3.37364	5.74952	3.80658	4.41799	1.93314	3.35035	3.27825	3.44214	4.81686	2.81638	2.27653	2.49843	4.10341	9.47181	3.98043	6.16397	3.64006	2.30922	1.4672	6.92196	2.3454	2.99085	2.46695	6.28157	3.84198	4.34515	3.44091	2.85533	4.06414	4.01102	3.12501	3.69329	3.22334	2.16883	5.19187	4.07854	6.89076	2.35198	2.49913	6.16591	4.36356	3.37959	3.02537	2.88932
HMGA2	0.0205013	0.00879512	0.142133	0	0.0368481	0.021966	0.00226186	0.0104642	0.0361819	0.0811847	0.00750718	0.0483765	0.00349081	0.00972288	0.032804	0.2296	0.0122449	0	0.00842085	0.00937899	0.011754	0.0262555	0.0434339	0.00896813	0	0.0263426	0.0279103	0.0100755	0.0125505	0.0379951	0	0	0.0212167	0.0043267	0.00202472	0.00448547	0.0120527	0.00394586	0.00837091	0.00809902	0.0041362	0	0.00838617	0.00268604	0.0369059	0.152524	0.0035228	0.00214383	0.00363604
LSS	12.115	20.3216	13.1495	7.48451	11.4994	14.0087	18.4883	13.8511	14.8672	11.8607	13.0722	11.1699	16.8557	15.6572	25.6898	6.01873	15.105	14.3272	13.2818	11.9422	17.5694	13.2061	12.6524	15.3061	16.3294	15.4676	13.1051	8.67522	12.9383	13.9612	16.0385	9.98989	12.1438	8.91596	18.1248	15.7595	14.2524	15.2365	11.579	21.3201	13.3352	12.5794	11.8103	12.8898	15.5137	15.7709	11.62	19.3165	17.2552
CLSTN3	12.4858	5.80661	4.82645	8.53982	4.51801	5.77083	5.36421	6.53376	7.16252	9.77702	6.85966	14.0683	3.80259	9.45223	10.6566	5.04616	9.95015	7.8887	5.08874	4.77691	7.95393	3.27158	6.4625	10.0056	7.89237	8.52587	8.57254	5.01411	4.40095	4.86734	7.61377	3.70411	8.5632	3.97697	6.39409	6.93915	5.04797	3.5192	8.66592	9.24943	8.37091	5.58435	5.47756	8.32284	4.86119	5.34465	9.08576	17.0326	8.2316
CNPY3	46.8852	44.1943	40.0012	38.9326	34.4396	36.6872	33.3539	35.0498	34.0785	48.6667	31.6606	39.1481	60.8826	44.0637	36.766	33.6933	41.7906	31.6331	28.0576	29.1404	35.7018	58.5833	37.8496	36.6117	34.3026	40.4095	45.6214	37.4205	39.1504	34.7216	32.5825	42.7455	38.5741	54.7323	43.3373	39.7911	28.5376	40.5956	34.2527	37.1624	35.7996	28.5094	50.2923	42.8231	39.4939	39.2712	35.8311	59.7934	32.6646
RNF14	9.40314	8.9712	9.60144	12.2107	10.5643	9.25464	9.1238	6.16392	8.94021	9.15527	12.0456	9.93624	9.0082	10.0216	8.11278	16.5146	9.6126	9.64401	7.53824	9.17328	9.09773	10.2497	10.0383	10.7265	10.3474	10.0008	8.99913	14.5764	7.88016	9.17586	9.63008	11.8717	9.16923	14.3747	7.14789	7.41879	10.3365	9.71937	10.0161	8.63013	10.0094	8.20928	10.2657	9.00138	9.23979	10.1007	8.60657	8.1312	8.37224
FOXA1	6.50772	5.91113	21.757	3.81067	9.89356	10.173	5.13581	15.4855	6.83392	19.6966	6.41761	5.75938	6.46118	7.95712	9.39899	3.87547	6.22854	4.69885	3.64276	5.52656	4.63757	7.43568	14.6456	4.14547	4.03322	12.4824	7.54957	7.32706	5.3749	10.4629	5.98442	3.81043	6.33197	3.3919	3.69276	4.19882	7.30409	7.05923	4.48786	8.27067	9.27169	6.88631	5.08211	5.56906	13.4192	11.5915	4.81024	7.67901	8.12943
RAD54B	0.140411	0.158673	0.277693	0.162411	0.144832	0.141436	0.151134	0.0639273	0.182358	0.216986	0.230745	0.251412	0.19593	0.211606	0.194141	0.162713	0.20182	0.205778	0.0675202	0.133694	0.138228	0.0877177	0.262026	0.233703	0.150637	0.228822	0.149194	0.172347	0.0718807	0.222445	0.141409	0.101048	0.111232	0.115641	0.0784676	0.203804	0.20939	0.0790969	0.156613	0.173173	0.127132	0.112923	0.117051	0.0933283	0.145059	0.209824	0.141233	0.114598	0.165209
LRRC49	0.55509	0.6	2.52698	0.491118	1.1228	0.878942	0.812491	0.891901	0.75225	2.21216	0.596047	0.741671	0.586609	0.788027	0.606882	0.911744	0.638701	0.583591	0.770284	0.766352	0.637859	0.87461	1.91701	0.625629	0.426786	1.13714	0.971223	1.0718	0.563885	1.47278	0.405024	0.618481	0.842899	0.718181	0.334	0.425284	0.768037	0.383247	0.647847	0.690901	0.940567	0.378974	0.557377	0.389258	1.0844	1.85349	0.532243	0.390004	0.412014
GCM1	0	0	0.0509333	0.0102578	0.0120747	0.0111242	0	0.17488	0	0.0210352	0	0.0299435	0.00972313	0.00773762	0.0652647	0	0	0	0.0781834	0.0696635	0.0523825	0.00522364	0.0207392	0.0499588	0	0.0122289	0.00555285	0.0224511	0.00998791	0.010079	0	0	0.00909168	0.00803425	0.0225583	0.0249872	0.0111904	0.0109906	0.0186527	0.0150391	0.0115208	0.0320948	0.0103815	0	0.0362809	0.0249902	0	0.0238853	0
C19orf18	0.237267	0.518196	1.45518	0.464964	1.05815	0.689121	0.571139	0.201319	0.348047	0.699218	0.410719	1.76446	0.558256	0.537786	0.315553	0.351369	0.343549	0.21601	0.141756	0.473654	0.672743	0.299917	0.605819	0.868069	0.418574	0.739079	0.318819	0	0.422549	0.304573	0.429966	0	0.274738	0.218505	0.204504	1.05711	0.845393	0.132848	1.12732	0.68169	0.41777	0.387943	0.188229	0.633032	0.328908	0.49086	0.355814	0.649601	1.10175
AC011247.3	0	0	0	0	0	0.0349527	0.0395903	0.0261657	0	0	0	0	0	0.0486239	0.0820259	0	0	0	0	0	0.0822941	0	0.0217212	0	0	0	0.0174473	0	0	0.0316687	0.0319333	0	0	0	0	0	0.0351606	0	0.0879116	0	0	0	0	0	0	0.0392602	0.0308305	0.0375243	0
VWA5B1	0.0247594	0.0424874	0.0662524	0.013343	0.0523547	0.0627032	0.0655596	0.0649936	0.0649211	0.14137	0.0407989	0.12334	0.0168634	0.0570341	0.0339577	0.0336106	0.0147882	0.0309941	0.0610191	0.0302053	0.0511031	0.0181193	0.0269769	0.0487387	0.0600589	0.111349	0.0866757	0.00486729	0.0303146	0.00874031	0.01322	0.020293	0.0532178	0.0174178	0.0122263	0.0162513	0.0194081	0.0285925	0.0849201	0.104333	0.0149859	0.0278319	0.0270079	0.0259515	0.0471931	0.0704307	0.0170179	0.0207128	0.017565
B3GNT8	15.3341	11.6387	11.2929	13.3641	13.8606	19.0721	11.136	7.50735	12.4989	5.63311	9.0859	16.435	9.39665	14.6131	16.6205	13.9392	15.8684	12.0587	8.46713	6.62965	13.6413	12.7015	12.4643	10.1722	14.4969	7.84877	10.487	11.1136	17.3598	18.0833	10.5567	20.7682	15.8155	11.9016	18.0231	10.7653	9.89001	20.7891	6.77023	12.0711	9.96104	19.0049	21.521	18.8541	28.1929	13.9191	10.2211	16.2111	13.2991
LURAP1L	13.8117	10.4367	13.9678	13.769	12.8566	17.0022	15.851	15.2821	14.5415	9.83465	11.0915	10.7181	7.17507	14.37	8.21028	17.2162	10.1146	16.8107	26.7687	20.6668	11.5659	13.251	13.8877	11.7435	12.0839	11.3555	14.4318	14.8788	11.4119	20.7053	18.6903	12.9894	9.25597	23.2984	9.15711	8.79823	14.4693	13.7834	15.2765	11.2149	12.8197	15.3731	14.9179	10.9061	12.5318	12.7047	14.0872	8.37926	9.62765
TMEM173	43.5788	34.2812	45.508	35.413	37.2889	36.6104	37.2737	39.2934	35.0682	53.1693	26.6482	35.5583	50.459	46.1066	34.554	24.064	46.4908	31.3672	42.8536	30.0812	44.909	47.2279	44.2417	34.2201	35.5141	38.0109	41.4349	28.6846	45.3916	38.3716	38.8164	37.9822	44.1164	55.1156	53.7183	37.1379	29.5751	39.19	35.3187	39.6713	38.8216	28.1285	40.2167	39.8579	36.088	44.3932	36.2425	50.6728	36.9275
UBXN10-AS1	0.735274	0.464852	0.351449	0.722973	0.196392	0.964968	0.546502	0.270892	0.437106	0.798305	0.566829	0.568192	0.316288	0.3356	0.566139	0.945595	0.369821	0.51673	0.254326	0.188843	0.0709988	0.538086	0.562195	0.812566	0.250324	0.861897	0.842944	1.46064	0.920552	0.163932	0.220403	0.253742	0.147874	0.827607	0.152877	0.27094	0.303347	0.536277	0.455072	0.244606	0.624607	0.406009	0.5347	0.567867	0.655665	0.541945	0.265988	0.453235	1.31778
ZSCAN18	4.09836	3.0333	7.30839	2.47538	6.8646	4.62838	4.70566	5.24158	4.29563	7.37618	2.95799	6.71758	2.58262	4.43755	3.01956	3.10911	2.56186	4.48104	5.02253	4.38826	5.10427	3.24441	5.98267	4.18632	2.96917	4.33905	4.47468	2.69398	4.19884	5.2201	2.77732	2.13032	4.43941	3.04593	2.85701	3.51811	4.68944	2.89001	4.70301	5.49635	3.96126	4.01673	3.56954	2.77415	5.80864	6.14703	3.27582	2.59973	3.61372
HOPX	41.2011	50.5461	43.7487	60.2339	55.1505	69.3402	38.4165	50.756	49.4762	21.5492	44.2405	30.9582	23.5867	41.8811	42.7157	144.71	39.3533	46.2448	42.4659	53.7635	44.9617	100.608	28.5671	47.8123	49.9694	48.035	31.7291	132.978	46.7412	53.0734	40.9541	72.5199	37.2684	92.0823	33.2504	33.6269	57.5247	68.6369	39.5309	35.3507	42.9649	80.455	85.1781	40.0977	67.3652	47.5923	31.3406	34.2608	36.7365
AMOTL2	44.9377	18.5073	36.4935	15.864	24.1305	30.7738	31.713	12.5134	25.5265	27.3073	23.1402	19.6331	13.1592	38.0589	13.6609	8.75302	20.6186	26.2255	23.7672	15.145	26.1465	7.24099	23.954	20.5508	18.9706	31.6035	25.373	10.8822	12.9914	9.9803	33.7836	11.0399	19.0429	11.0145	10.1472	13.5374	22.5287	22.5734	21.1031	23.6615	31.2321	21.3847	16.101	22.2215	29.1641	16.8357	27.5661	18.6463	16.5519
PHKG2	2.39706	2.51223	3.48159	1.86592	3.49916	3.05371	2.06467	2.98363	2.23505	4.15555	2.0096	3.61099	3.67338	2.49019	2.86462	1.75901	2.1978	2.22418	3.24453	2.3279	3.34656	3.26221	2.33173	2.3409	2.80187	2.63875	2.25326	1.71542	3.15555	2.42351	1.90486	2.08098	2.1928	2.22177	2.54179	3.87818	3.20168	2.27037	2.88816	3.23405	2.09566	2.41089	2.14264	2.94775	3.05488	3.22531	1.62228	3.39493	2.78575
HLA-DRA	2409.17	2706.67	1281.17	1873.07	1412.07	2216.25	1673.85	2199.22	1754.61	1217.07	1553.89	1763.73	2930.61	1818.9	3025.76	3529.62	2149.92	1764.28	1313.11	1708.41	1843.77	3998.89	1632.36	3051.7	2107.87	2239.28	2075.34	4823.1	2161.56	1634.46	2079.04	3106.03	2691.01	2966.84	3034.28	1663.22	1472.52	2497.53	2200.35	2071.03	1711.7	1860.49	3556.06	3906.79	1314.12	1883.16	2104.4	2812.7	2080.86
SF3A1	26.4221	24.5246	25.8301	22.4384	25.7903	21.2499	27.4026	27.599	27.2573	25.4649	29.0773	23.2591	17.9938	27.0093	23.5287	13.6563	25.6187	28.9234	19.9953	22.8182	24.6354	19.3247	28.5587	25.1107	22.3459	25.0137	27.0926	11.5151	21.7477	25.4951	27.906	17.3389	27.9685	13.6187	22.8789	22.3076	25.065	25.1793	25.3229	24.6253	26.9979	23.9814	21.4595	23.2001	24.082	24.8322	28.4983	20.2229	22.1493
ZNF395	12.088	8.68957	14.9303	10.5087	13.1102	11.613	11.2978	9.67092	12.0511	14.658	10.2339	10.6284	6.34804	14.0412	7.84595	10.0372	10.1451	12.6807	7.99101	9.0037	11.8914	6.33681	12.8865	8.76556	7.1654	10.8429	13.9552	9.91595	9.21185	10.3734	10.3442	7.14425	8.36366	5.78369	7.51667	10.0268	9.28401	7.57245	9.60768	12.5271	9.39937	10.7922	9.46143	9.5203	12.8549	11.5242	10.1222	8.38161	9.70646
NACC2	9.12653	5.60237	9.7867	5.30131	10.1428	6.42931	7.57947	5.89693	9.315	8.00819	6.54966	9.98759	4.81624	8.5228	6.67581	3.6406	8.14637	8.75153	7.94028	5.00111	8.05323	4.37186	8.00948	6.82349	7.51971	8.67357	8.14517	3.12022	7.82316	8.61326	8.2839	2.99207	8.89015	4.45095	9.53075	7.63032	7.33206	6.25309	6.72575	7.08619	10.5697	9.63464	5.01501	5.75392	9.37051	8.15341	9.63799	6.19495	6.06109
PDE5A	6.42868	5.73067	8.66529	7.0479	9.16722	6.10132	11.2591	4.7465	8.38267	5.88167	11.238	7.77541	3.19038	7.89901	2.93162	9.69714	7.52184	10.8244	3.21999	7.06928	6.95665	2.24297	13.7645	7.2283	4.40657	9.06289	9.26715	6.15376	4.32542	4.61291	8.81419	5.79855	7.33324	8.41545	2.02276	6.26577	6.27057	4.70369	7.17299	8.26131	7.42358	5.09907	5.35336	4.02515	5.52127	5.85654	8.22112	2.30728	5.78393
RGS14	3.84642	2.4529	5.08807	2.26335	2.78734	3.32534	2.248	2.29227	3.77425	5.78252	1.38565	3.33617	3.71015	3.2906	2.50938	1.53116	3.21219	3.36616	2.41968	2.42233	3.19467	3.0317	3.57927	3.48342	2.83775	5.0047	4.24176	2.80386	3.5348	3.3175	2.3461	2.61577	3.08521	4.18318	3.31006	3.24796	1.60533	2.43304	4.33299	4.04113	3.05378	2.15798	3.60229	3.23619	3.76926	4.97716	2.16503	4.63535	2.79513
TRAF1	2.97162	1.9116	2.43787	1.14788	2.01904	1.64785	1.06966	2.12442	2.55551	2.67858	1.20134	3.7295	1.74672	2.17296	2.80941	0.756105	1.83764	2.51825	2.49397	2.35211	2.56593	0.90033	2.11034	5.41385	1.7381	4.57724	2.17127	1.13585	1.56304	1.19702	1.32467	0.928071	2.14587	1.21941	1.68773	3.53537	1.37698	0.669133	3.32289	3.31427	1.82268	1.58705	0.620924	3.4066	0.95925	2.08397	1.25789	3.16952	2.60967
TCHP	1.8921	1.65711	2.24975	1.26245	1.99493	1.8243	1.87396	1.21309	2.03656	2.26443	1.83271	2.0072	2.06369	2.15741	1.73003	0.730902	1.68735	2.08841	1.11742	1.76579	2.25559	1.20122	2.36452	1.93381	1.87254	2.6889	1.83145	0.802192	1.34514	1.62212	1.7381	0.875442	1.46183	0.89801	1.53454	2.0298	1.92401	1.40634	2.03075	2.13564	1.85064	1.3722	1.05416	1.46227	1.77647	1.82017	1.8249	2.11535	1.96398
MPC2	11.7938	12.8729	16.8162	15.0483	18.3024	16.934	12.7235	12.9836	12.5164	16.1359	12.1659	13.4637	16.5394	12.6338	14.4677	26.4349	14.3624	10.4685	11.2832	12.4727	12.3867	22.6555	14.3285	14.3035	12.3863	12.9051	13.639	27.3048	13.4945	15.5614	10.8684	22.971	12.1949	30.258	12.5077	12.5076	12.6093	12.2652	13.9547	10.6891	14.5919	16.1233	18.0306	12.2401	14.8981	17.0714	11.1521	13.677	11.6642
EIF3A	30.801	28.0205	28.6093	26.6133	31.9667	26.6109	34.5206	42.4912	28.763	31.6284	35.7435	29.5975	25.8282	27.0015	31.7712	12.3452	31.5454	35.8038	51.239	40.7292	28.8105	18.2042	33.5455	32.5158	29.4739	33.8224	30.1278	12.4225	35.0253	38.5747	36.3406	14.2693	34.4331	14.5658	42.6079	32.5843	29.4337	31.1636	30.7481	27.886	37.1349	30.2514	17.7925	31.6431	29.2008	33.3132	33.6566	28.8036	30.1521
GRB10	5.78355	3.14701	3.59853	6.15516	6.30531	2.35235	4.33742	2.47532	5.29064	4.85758	6.31424	10.3409	1.9628	4.56763	2.52611	3.1981	2.93674	4.23033	7.09576	3.68038	4.35503	2.01167	3.54074	3.36519	3.43556	4.41703	3.96965	1.49513	3.26044	3.18088	4.23894	2.53442	4.70968	2.70535	4.64948	3.55384	4.87271	3.49608	4.86756	4.07718	7.43517	2.9777	2.32953	2.92491	3.01973	3.6168	6.11426	2.15184	3.13991
NETO1	0.0250779	0	0	0.0257422	0.00606037	0	0.0063241	0	0	0.063346	0.00524746	0.0075144	0	0.00388356	0.0327568	0.00486329	0	0.00597959	0	0.00874113	0	0	0	0.00626866	0.00926957	0	0.00557402	0	0.00501299	0.00505872	0.010202	0	0.00456317	0	0.0169832	0.0188118	0.00561651	0	0	0	0.00578234	0	0.00521055	0.0075101	0	0.0250855	0	0.0239763	0
LCT	0.00599341	0.00514239	0.0116636	0.0301457	0.0101386	0.00934052	0.0105799	0.00699235	0.0241773	0.0132468	0.0219468	0.0125712	0.0163282	0.0292364	0.0438401	0.004068	0.00477297	0.00500176	0.0131295	0	0.0439835	0.00438608	0.0116092	0.0104871	0.00775373	0.0154022	0.0139875	0.00471283	0.0503187	0.00423147	0.00426683	0	0.0114509	0.0168651	0.00473532	0.0157356	0	0	0.0234929	0.0126277	0.0145103	0.0134743	0.00217924	0.00628198	0.0101546	0.00524582	0.00823894	0.00501388	0.00425189
PWAR5	0.148953	0.660315	0.672347	0.276493	0.367462	0.31919	0.744995	0.412727	0.505736	0.53041	0.727252	0.507697	0.228264	0.0941897	0.306436	0.00842511	0.207588	0.414359	0.387487	0.575436	0.398531	0.0635871	0.577045	0.499549	0.208761	0.733676	0.260722	0.0390424	0.251849	0.438183	0.48603	0.0915624	0.328065	0.0209573	0.0490359	0.315031	0.32109	0.162457	0.54332	0.470752	0.631088	0.362782	0.0315935	0.338271	0.325977	0.380256	0.426585	0.134993	0.625223
FN1	269.95	144.721	96.084	177.505	174.013	227.499	342.023	178.564	101.062	154.885	215.557	155.185	263.379	180.987	294.447	77.2577	225.66	354.751	232.324	152.991	147.224	68.3063	331.747	235.916	101.924	288.779	292.959	107.647	233.563	167.415	192.443	131.376	346.889	188.824	346.86	286.236	100.93	242.661	187.905	227.459	154.767	87.8622	85.5429	230.28	160.096	194.217	224.637	71.5257	153.87
CTSZ	235.335	365.217	190.182	138.613	138.576	258.918	156.162	184.918	184.788	149.372	150.513	187.687	339.987	204.802	301.854	103.723	203.617	198.522	128.455	183.215	201.373	357.221	160.589	312.789	359.567	230.651	218.695	169.799	228.047	168.195	154.116	277.659	228.004	273.923	442.897	266.188	130.43	198.244	163.202	178.391	164.026	224.598	212.843	357.336	159.303	186.985	180.996	221.282	206.724
ALOX15B	9.73779	31.8993	8.57465	21.984	45.2505	17.7765	29.7654	42.2799	20.7085	11.8034	77.5215	8.24382	32.62	11.4179	53.1955	13.2721	37.5183	34.3558	40.5796	14.5514	23.9762	38.0927	16.0277	23.1291	70.5532	8.15172	13.7311	3.44419	68.4212	31.4211	30.9783	84.641	40.8833	21.7452	70.469	29.719	79.2745	135.376	10.9861	21.6155	52.0957	42.6908	24.8514	15.9727	37.8121	25.6835	24.5862	31.9963	33.9401
INTS6	0.953971	1.03957	1.24018	1.06629	1.24207	1.11053	1.10354	2.04541	1.2578	1.08303	1.18312	1.38914	1.13823	1.00309	1.3724	0.926356	0.888489	1.34432	1.78813	2.42766	1.27753	1.29888	1.04606	1.61779	1.08302	1.35601	1.2104	1.09631	1.31105	2.17079	1.25475	1.02095	1.03278	0.856924	1.18468	1.23099	1.36822	1.11268	1.81156	1.11012	1.22879	1.21644	0.732562	1.4143	1.38559	1.47492	1.23375	1.16505	1.0791
NXPH4	0.211132	0.0315049	0.238191	0.118728	0.310573	0.107297	0.0648176	0.257032	0.059249	0.338152	0.0537828	0.327324	0.0875308	0.238822	0.20144	0.112152	0.190071	0.0612866	0.0904928	0.0447952	0.0336832	0.0940497	0.311168	0.0642494	0.0950067	0.157269	0.107118	0.0144366	0.0256898	0.142583	0.0914928	0.0902848	0.152	0.330638	0.0217582	0.112471	0.0575653	0.0565377	0.155924	0.0773638	0.222244	0.0412754	0.0534045	0	0.217742	0.192832	0.100952	0.0460764	0.0651231
LYPD6	0.203912	0.100937	0.287446	0.152155	0.398012	0.100837	0.1869	0.0640495	0.208808	0.820488	0.1838	0.312553	0.101491	0.782156	0.0788804	0.585556	0.143652	0.111267	0.309254	0.172221	0.17986	0.143487	0.208882	0.418553	0.213071	0.255293	0.539955	0.320686	0.0932807	0.11628	0.318255	0.392107	0.252234	0.42814	0.0154912	0.109819	0.178283	0.0483036	0.281802	0.363532	0.234181	0.170443	0.108364	0.123306	0.159454	0.253986	0.145546	0.157463	0.306012
MGST2	10.4326	11.2822	10.7025	14.3597	8.97093	10.6523	8.37593	7.53296	8.44198	10.7203	9.7118	10.5509	12.6987	12.795	9.23268	17.3953	9.82954	7.06039	6.82772	9.53412	9.4677	13.068	9.299	8.96453	10.608	9.09611	11.9229	15.1097	8.56617	8.40783	10.0059	16.8166	8.61124	15.9524	8.02213	8.27252	10.1128	9.12053	9.3603	9.33071	9.97093	9.56585	12.8956	10.7269	9.3318	9.31585	9.08908	11.2078	9.75086
FGF1	1.50782	0.539317	1.54361	1.10763	1.36078	0.536449	1.45302	0.750794	1.0052	2.81163	0.756273	0.533646	0.468885	1.24514	0.266837	2.05193	0.727022	0.537057	0.72947	0.958533	1.5788	0.399759	1.97488	0.929637	0.62441	0.551262	6.7556	0.953226	0.71201	0.929829	0.713854	0.699172	1.06273	2.05933	0.245356	0.648329	1.10274	0.627944	0.56219	0.930199	1.05076	1.03182	0.672049	0.517655	0.551505	1.56535	0.889788	0.388119	0.679502
PI15	0.775	0.0567934	0.0894548	0.998801	0.125969	0.0343861	0.0973714	0.241327	0.131284	0.280408	0.206026	0.983435	0.0112707	0.0867022	0.605222	0.554108	0.0878557	0.156514	0.286988	0.10094	0.01012	0.0706424	0.285811	0.0965177	0.0463848	0.132303	0.205974	0.286271	0.29716	0.0428386	0.0353427	0.167276	0.526939	0.524635	0.411844	0.11103	0.142687	0.0424665	0.216216	0.0464875	2.14562	0.0909412	0.0441244	0.167666	0.0233643	0.106215	0.299516	0.493752	0.164355
ANK2	1.56919	0.511401	0.511774	1.13688	0.889111	0.751563	1.36397	2.05958	0.743174	2.20679	0.809533	0.875125	0.351334	0.661383	0.816476	0.598742	1.04426	1.80336	2.2838	2.07564	0.787334	0.672522	1.46414	1.15101	0.420597	0.861474	1.66502	0.726031	2.22	0.700843	0.52771	0.550688	1.79235	1.14904	1.78521	1.12861	0.440029	0.815958	1.02515	0.778598	1.01799	0.761769	0.561899	1.04273	0.391088	0.681039	1.11431	0.73252	0.901039
FBXL22	0.431424	0.299881	0.563265	0.204049	0.369525	0.182984	0.269924	0.133797	0.449408	0.410387	0.383951	0.630002	0.21573	0.455832	0.219704	0.17792	0.443601	0.191415	0.10767	0.226517	0.300576	0.23979	0.661131	0.172001	0.176626	0.26197	0.20817	0.240477	0.175756	0.215915	0.303252	0.116374	0.239977	0.307342	0.103553	0.353669	0.436638	0.100904	0.242604	0.391208	0.396644	0.302846	0.341536	0.160272	0.296084	0.200755	0.307793	0.21929	0.286693
MKRN3	0.0137751	0	0.0379772	0.0395921	0	0.0295186	0.0607913	0.0321421	0.019449	0.0405948	0	0	0.0140732	0.0223987	0.163737	0.0140247	0.0493654	0	0.0678972	0.0336101	0.037909	0	0.0466942	0.0120517	0.0579183	0.0354	0.00803715	0.0162478	0.0048188	0.0534903	0	0.0338706	0.00438641	0.0155049	0.0598595	0.0241108	0.0809842	0.00530257	0.0179985	0	0	0.010323	0	0.00721918	0.0175042	0.0482275	0.00473405	0	0.0195449
IMPACT	7.34393	8.33955	8.36163	8.16627	7.96987	7.71773	9.0322	5.11268	8.63179	6.66418	11.2976	7.56725	8.11235	8.23937	7.79363	10.5359	7.33137	7.91053	4.26816	7.35346	7.51724	6.13798	8.51957	7.77332	8.32238	8.06476	7.91408	10.5461	5.69964	6.14829	8.81667	7.12429	7.56251	7.9093	5.27601	6.33579	8.27955	7.01333	7.92289	7.98178	9.87775	7.26585	8.02256	6.98245	7.65601	8.68291	8.24737	7.09712	8.17084
FAM129C	0.0714652	0.163514	0.144871	0.0171169	0.0805952	0.076571	0.0735897	0.0937985	0.0456457	0.18428	0.0523385	0.268567	0.0730115	0.232409	0.103461	0.0565911	0.303534	0.104371	0.101109	0.283349	0.185745	0.0348663	0.190339	0.515822	0.0346707	0.173452	0.0741274	0.0374637	0.216666	0.0252279	0.169592	0.0439301	0.119472	0.0904944	0.0729324	1.15184	0.186731	0.0137548	0.28791	0.0878339	0.0288367	0.00892598	0.0368123	0.218476	0.0605412	0.119889	0.0491204	1.10105	0.0844989
MRPL49	21.0627	18.2644	19.0005	24.2005	17.1594	19.928	17.3971	12.1857	19.2577	18.5817	19.025	15.6851	14.3064	20.7068	17.6004	39.8398	20.749	17.1232	12.725	14.853	17.4816	29.1212	18.2023	18.2761	18.9094	18.3007	20.5679	28.0054	17.5742	17.0921	15.8389	26.4909	17.7316	32.8028	18.7779	16.3303	18.5849	20.8777	17.0883	19.2119	18.6475	16.9513	28.402	16.0925	18.4457	18.8561	14.7898	20.6062	16.929
ARHGAP24	6.0347	4.12426	4.85204	6.18329	6.57768	6.02098	7.3926	4.89167	5.35	4.81008	7.30384	3.83188	2.06699	3.97427	4.18967	4.36706	3.55768	6.43169	3.82985	5.58397	5.11913	2.35243	6.36671	3.82547	4.27165	4.61784	4.05198	3.44613	3.78558	4.42625	4.88966	3.73513	4.77784	4.46092	2.08228	3.43788	5.54425	5.04947	4.03703	5.70531	4.99496	5.61839	2.94926	4.50982	6.21589	4.85818	4.94379	2.78101	4.6707
EGLN3	0.79385	0.469427	1.75888	1.00208	0.467294	2.30092	1.10308	2.82542	1.15545	1.79806	0.907435	0.916929	0.515112	1.13674	0.730754	2.57033	1.17896	1.04299	1.19266	1.32837	0.551087	0.673199	1.6234	0.830619	0.451052	1.07977	3.33194	1.11771	0.713025	1.65113	0.618619	1.14303	0.836925	0.618836	1.13152	0.563307	0.613866	0.83416	1.668	1.57653	0.545417	0.450202	0.815237	0.882672	0.640697	2.09857	0.689423	1.11283	0.768663
FOXQ1	3.77464	3.51514	3.84457	8.41788	3.99081	4.9859	7.33356	1.7991	3.94597	2.71311	2.09016	1.7138	2.69628	3.41813	4.73502	2.32769	6.39693	11.1214	19.6009	3.48175	3.96931	6.84691	3.41054	2.63788	1.60791	6.13166	5.55058	2.1537	5.02412	6.28869	12.8627	1.9996	3.72314	1.15283	3.94609	3.3437	5.52073	2.92373	6.49572	8.0499	4.66215	2.27676	6.96283	2.82254	3.29515	1.45045	7.10305	3.94716	6.33536
RER1	13.1506	13.7709	13.6441	14.0942	12.7363	13.647	12.1519	11.0051	12.6999	13.6642	11.5613	14.9483	14.9516	14.3232	13.7935	18.8922	12.8037	11.8661	9.99026	10.8647	13.3996	16.192	12.0915	13.3621	14.1013	14.2476	14.0398	15.5712	11.9036	12.9328	11.9891	14.5587	12.4213	18.7055	12.7739	13.858	12.9126	12.618	12.9458	13.7295	13.4114	12.0225	15.9287	12.497	13.3791	14.5699	12.0232	16.0088	12.7492
HOXC12	0.0118359	0	0	0	0	0	0	0	0	0	0.00866815	0	0	0	0	0	0	0	0.0194462	0	0	0	0	0	0	0	0	0	0	0	0	0	0	0	0	0	0	0	0	0.0124687	0	0	0	0	0	0	0	0	0
SEMA4D	3.33956	3.30067	2.56146	2.07513	2.78221	2.99655	2.55637	2.4099	3.37805	3.68648	3.22768	2.95859	2.97324	2.57762	3.42817	1.18633	3.11906	4.22936	2.51443	2.00985	3.59537	1.89008	3.4679	5.08499	2.47577	4.85463	3.48167	1.25382	4.09958	2.47982	2.60969	1.45539	4.39746	1.31939	3.44465	3.80091	2.57626	2.61183	4.358	4.06433	2.74456	1.49992	1.62377	4.80349	2.31664	3.18407	2.18234	4.38653	3.38764
CLDN9	0.336961	0.264334	4.15934	0.179862	1.35175	0.937754	0.356892	1.16814	0.38837	1.33348	0.225626	1.17123	0.655718	1.04363	0.79225	0.418214	0.490689	0.321381	2.16177	0.422823	0.635872	1.55002	2.20051	0.539068	0.224193	0.890681	0.561718	0.696478	0.511917	1.25068	0.233036	0.489226	0.833863	0.227565	0.486819	0.572938	0.482987	0.370598	0.452852	0.628817	0.668177	0.894635	0.658113	0.383458	2.02265	2.17406	0.410271	0.418808	0.614698
SFI1	1.25966	1.53843	3.30323	0.880658	2.20493	1.71048	1.19909	1.4072	1.55779	3.32997	1.07094	2.04026	1.82851	1.4024	1.45267	0.468758	1.05609	1.64518	0.891416	1.13524	1.96008	1.2837	2.59227	1.9091	1.32552	2.26919	1.34568	0.624649	1.5335	1.7764	1.0849	0.677655	1.5105	0.569327	0.892772	2.31831	1.55546	1.03593	1.72424	2.42517	1.20627	1.07398	0.999745	1.54971	2.25783	2.38954	1.01178	2.33	1.80568
ISLR	61.9798	8.11508	17.04	22.926	15.2996	11.7748	25.0307	13.181	18.737	32.5761	21.5703	17.405	5.92847	19.0957	7.95875	21.5258	24.2557	27.6877	11.5251	11.25	13.9767	8.6141	28.4465	14.804	13.0485	20.3561	34.162	17.7331	9.77074	7.58531	14.8871	17.1147	21.788	29.1095	8.09737	15.8821	7.81933	12.7199	13.1882	19.009	22.8387	9.93406	21.2896	11.1216	9.01387	11.6672	25.5666	9.59364	11.197
BLNK	2.6891	2.58526	1.43265	2.03312	1.26969	2.29741	1.39167	0.856774	1.63806	2.26761	1.9694	1.72156	2.58915	1.80873	2.93273	0.923604	2.69195	2.20812	1.04096	1.73911	1.90211	1.59647	1.64213	3.68489	2.24244	2.72908	1.68449	2.07208	1.26182	1.32671	2.10664	1.31002	1.46154	1.64711	1.31403	3.23237	1.54072	0.972781	2.26478	1.96823	1.13301	1.24635	1.51967	3.9279	1.24424	1.58802	1.98935	4.09267	2.42105
DDX28	5.70524	5.49629	4.37384	5.57056	4.67935	5.99851	5.63792	5.27608	5.43252	5.83231	5.41114	6.05016	8.72598	5.94785	5.85716	10.7834	4.98551	4.3588	5.54147	3.1526	6.41051	9.14279	4.16838	4.90387	5.262	5.37826	6.1372	6.76869	5.57679	4.3428	3.77017	6.93578	6.16003	6.93377	7.59181	5.33541	3.39513	5.89847	3.35272	6.15406	5.0962	5.30516	8.62868	4.2346	5.99712	6.02098	3.89013	7.00316	5.1513
TM4SF19	0.478078	0.9809	0.72812	0.0896138	0.140649	0.210563	0.0917311	0.133377	0.310246	0.0306278	0.426241	0.130796	1.67054	0.371785	0.247071	0.0987588	0.231747	0.0346936	0.204907	0.202864	0.762704	1.63524	0.120787	0.818342	2.19162	0.249279	0.185958	0.179792	0.116342	0.102727	0.177576	1.70364	0.330944	1.39207	0.459837	0.782215	0.162935	0.24004	0.217272	0.065692	0.335492	1.41751	0.50638	1.00219	0.299348	0.072773	0.128582	0.312999	0.545607
FBN3	3.29817	0.552575	0.691221	1.12744	0.515011	3.91132	0.213591	0.919848	1.42022	2.13083	0.766085	0.581267	0.659284	2.2044	0.96001	0.0370895	0.254885	0.169382	2.20175	2.23799	1.83679	0.0914046	1.30228	0.997127	3.14587	0.427969	0.856269	0.196428	0.808316	1.0141	1.33101	0.447868	0.222476	0.278974	0.604432	1.67378	1.8082	1.00966	0.69613	1.66118	0.790625	1.28408	0.0624452	0.466384	2.36748	0.871155	0.874582	0.479991	1.33189
SPACA4	0.58884	0.383278	0.737608	0.379338	0.652618	0.996798	0.0716862	0.379026	0.360401	0.747971	0.327151	0.979555	0.99572	0.484238	0.854014	0.220509	0.129361	0.271124	0.400328	0.148626	0.670544	0.297188	0.589957	0.31976	0.55164	0.800099	0.331714	0.478992	0.397769	0.401398	0.231287	0.066568	0.245695	0.0457093	0.30481	0.924038	0.445658	0.187587	0.557135	0.941181	0.196635	0.152164	0.251021	0.51078	0.791251	0.710884	0.139562	1.29096	1.03715
ESPN	0.225092	0.34517	3.34593	0.0481775	1.63652	0.757576	0.253624	0.759891	0.359343	5.18676	0.540145	0.58263	0.945946	0.59184	0.788213	0.123525	0.533956	0.095923	0.120652	0.0701114	0.421755	1.12855	2.02696	0.15084	0.161092	1.27178	0.964957	0.768247	0.395384	1.6433	0.300039	0.219815	0.902815	0.0808592	0.261088	0.385601	0.42046	0.184355	0.306621	1.08978	0.641582	0.200985	0.814967	0.471861	1.96366	2.16298	0.158005	0.905464	0.271807
GPR37L1	0.0119832	0.0411266	0.0738472	0.0258313	0.0456101	0.0116721	0.0211533	0.468345	0.0241699	0.0794566	0.0131641	0.0754041	0.0122425	0.02598	0.0219134	0.00406677	0.0143146	0.0250012	0.0885972	0.0657853	0.0714514	0.122773	0.0638315	0.0366937	0.0193784	0.0667224	0.0279665	0.0188456	0.0377275	0.0423019	0.0597175	0.0540183	0.0648686	0.0505799	0.0307702	0.0367052	0.0422696	0.00922557	0.0978575	0.00631194	0.0145059	0.103272	0.0196072	0.0376805	0.0406059	0.0786634	0.0494186	0.0150371	0.0382554
F2	0.00773972	0.0132815	0.0100414	0	0	0.0120621	0.0136625	0	0	0.0342131	0	0	0	0.00839	0	0.0105066	0	0.0129183	0	0	0	0.00566406	0.00749593	0	0.010013	0	0.0120421	0	0.01083	0	0.0110201	0	0	0	0	0.013547	0	0	0	0.0326142	0	0	0	0	0	0	0	0	0
PAPSS1	29.8314	31.4139	43.6833	27.1803	31.8795	55.2111	31.9846	27.2165	27.9044	41.8909	28.5259	24.9714	40.6204	28.3517	32.2311	37.43	34.0649	42.5929	20.9837	28.2173	32.2012	30.527	32.9917	27.7722	45.729	40.9488	33.506	43.8361	35.1837	33.2931	34.5651	30.2312	28.0513	31.9744	27.08	20.9573	40.1757	26.2475	27.9376	37.0159	45.5476	31.2137	24.896	34.0454	33.1217	33.6748	25.8671	25.274	22.5279
MMP20	0	0	0.0100375	0	0	0	0	0	0	0	0	0	0	0	0	0	0	0	0	0	0	0	0	0	0	0.0132548	0	0	0	0	0	0	0.0246359	0	0	0.0135417	0.0121291	0.0119126	0	0	0	0	0	0	0	0.0135433	0	0	0
VNN2	3.30562	3.55014	4.44912	1.26033	2.30777	1.30837	2.0774	13.3275	2.26783	1.93285	2.08605	3.49035	5.67708	3.5346	3.5502	2.35052	4.14275	4.91684	12.4304	6.76692	2.76418	6.61553	3.80405	8.14495	2.96738	3.41596	3.70866	2.53449	3.41929	4.42424	2.5081	4.05476	4.53028	2.82641	6.87579	2.67647	1.79796	0.900245	12.0367	1.64248	1.81475	1.80877	6.96637	6.15962	2.32409	5.35358	4.69869	3.97561	2.41423
GEMIN2	2.20591	2.12677	2.12368	2.19554	2.37345	2.36276	1.80252	0.945768	1.96838	2.50382	2.10076	2.22353	1.96431	2.2983	2.23789	4.17961	1.65119	2.06861	1.24652	1.82578	2.33102	2.40723	2.21947	2.15497	2.38994	2.2168	1.89192	3.23626	1.61424	1.77205	1.59818	2.6449	1.90624	3.92179	1.53963	1.9237	2.2485	1.96833	1.986	2.54557	1.50971	1.19164	2.32406	2.36932	2.29794	2.46973	1.74657	2.20404	1.96861
TNFSF15	3.33483	2.43415	2.23144	2.02052	1.15535	4.85412	2.99861	0.726762	2.14758	2.58409	1.83219	1.527	1.79252	2.9072	2.2417	0.618091	4.5903	3.3238	1.13994	1.44666	2.5795	0.499814	1.69122	1.72035	2.27529	3.8489	1.83917	1.0859	1.29874	1.23993	4.61647	0.656145	1.00535	0.827877	0.579144	2.29014	2.03556	0.824344	2.43524	2.42467	2.35409	1.4511	0.620382	2.75856	2.28889	1.01164	1.57853	3.62905	2.80065
UGDH	8.00186	7.90388	14.4201	7.98645	12.6613	9.62671	9.0264	15.9843	8.8532	14.7023	9.70518	7.81883	8.41427	8.47847	12.2595	13.6774	8.97581	9.90283	34.1234	14.9167	8.75471	14.4148	12.962	9.86931	7.75144	11.4437	11.2315	13.0447	14.788	20.655	8.73261	8.20599	9.72602	10.4566	17.6867	9.00983	11.7417	9.51113	10.825	9.08762	10.4267	10.3478	9.53756	7.88596	10.2673	12.1797	8.93405	10.0493	7.53898
TNFSF18	0.92391	0.101199	0.133894	0.310748	0.133014	0.229768	0.225554	0.126137	0.261685	0.984819	0.100776	1.0308	0.0267773	0.127856	0.0539214	0.52036	0.0939286	0.442939	0.441398	0.167871	0.234423	0.179823	0.104712	0.240775	0.101725	0.101034	0.321142	0.262778	0.178793	0.097151	0.265899	0.0644463	0.169009	0.387209	0.100953	0.275257	0.246545	0.0454019	0.308216	0.0414174	0.206232	0.692377	0.221577	0.206042	0.0166529	0.103234	0.256716	0.0164449	0.167348
EMC1	6.29894	6.06122	4.92156	5.2358	5.40455	5.85708	6.01594	6.21589	5.05056	5.64966	7.26371	6.54575	6.07614	5.75743	5.55435	4.52317	6.73265	6.65327	5.29786	4.7974	5.7289	4.46998	6.61922	5.57084	5.45904	6.47366	5.94394	4.49405	5.47145	5.45071	6.73113	4.96672	6.09697	4.86846	7.23593	4.99197	4.96224	5.34447	5.05094	6.29798	5.75782	5.3523	4.68443	5.21729	5.54176	5.55703	7.02344	6.26631	5.73731
SERPINE1	21.9636	12.2412	29.3099	19.685	85.2875	4.25217	11.7733	284.423	12.8983	4.64933	17.2272	33.0915	4.56783	2.87719	15.3417	14.8321	8.0607	25.4135	497.695	114.213	27.9005	52.4171	18.048	66.0369	22.3234	4.21866	6.79121	3.76551	48.8008	101.864	51.6748	93.8413	92.9494	114.319	124.879	43.0673	69.5744	12.3842	61.4048	16.1379	22.2785	78.3564	20.3409	31.6329	4.19297	50.1772	56.7706	2.11171	6.40819
FAN1	2.41845	2.37304	2.91442	2.11095	2.17223	2.17503	2.31176	1.45724	2.42164	2.72313	2.87963	2.9741	2.04433	2.47311	2.19672	1.76046	1.83209	2.63788	1.24946	2.0369	2.77679	1.26852	2.93169	2.4699	2.12294	3.1935	2.50854	1.09242	1.35096	2.4746	2.34102	0.992394	2.00897	1.52067	1.08504	2.31451	2.49769	1.5013	2.71863	2.8465	2.50972	1.39928	1.44822	1.8302	2.26201	2.48213	2.16819	2.08983	2.40968
EIF4ENIF1	5.6737	4.68716	5.34922	3.72949	5.11993	4.44894	5.13086	3.4516	5.41503	5.21969	5.38823	4.58604	4.14933	6.34732	3.76694	3.28513	4.47444	5.27368	3.61361	4.20287	5.99919	2.67549	5.03942	4.09822	4.85984	5.34092	4.93618	2.54064	3.5996	4.03094	4.48495	3.05228	4.49138	2.61801	4.59549	4.22441	4.43981	5.24965	3.72146	4.89373	5.02118	4.01119	3.37108	3.72658	5.61163	4.82686	4.00006	4.28236	4.98934
CTBP2	5.22707	4.80511	6.97217	5.742	6.03618	6.03168	6.39116	4.77092	6.13011	6.80136	5.25293	5.82415	4.90483	6.28779	4.41498	5.6467	5.44207	5.46217	4.85046	4.5005	5.65668	5.22922	6.48214	5.49592	4.88221	6.44996	6.25591	5.26291	5.03083	5.41024	5.45288	4.20878	5.46245	6.03974	4.31504	4.80333	5.75805	4.70855	5.71064	5.3109	6.21325	4.71842	5.3589	4.48656	5.76765	6.63772	5.70079	4.0334	5.114
AQP4	100.15	136.725	73.0046	123.41	95.1921	184.301	121.191	99.7542	83.9133	97.6291	108.009	65.1301	71.8413	85.6494	117.919	108.732	91.7403	101.22	67.0348	117.058	90.2668	62.9629	77.8837	107.496	184.468	123.379	66.0526	185.238	92.6111	102.539	102.566	149.597	83.9907	115.379	78.5029	134.434	149.319	111.829	68.6947	82.5904	131.288	92.7733	81.3793	118.233	121.245	99.901	80.9535	109.464	117.72
RPL9	129.985	114.801	76.3767	134.199	96.3078	113.298	87.9058	108.445	95.1676	113.915	80.1786	74.3974	94.2894	127.678	81.6071	397.915	81.4661	97.5309	78.5574	100.905	81.6517	226.919	65.0859	91.7552	109.998	87.9612	112.672	363.912	81.9006	102.974	91.9696	306.297	66.2441	311.953	60.9047	77.0501	99.1947	131.841	114.568	81.4308	100.071	95.1865	230.441	110.879	91.1439	103.689	75.8314	148.48	77.3152
ZNF71	1.94804	1.09233	1.4857	1.31931	1.72614	1.28118	1.6601	1.14569	1.47618	1.31501	1.51335	1.59012	1.1939	1.53957	0.959317	1.2636	1.25841	1.80992	1.4295	1.03802	1.67843	1.06043	1.47774	1.20897	1.26217	1.72078	1.70955	1.24758	1.31593	1.5086	1.67606	1.20599	1.6501	1.69581	1.60989	1.4221	1.09323	1.39878	0.994717	1.40857	1.78119	1.5917	1.0933	1.54227	1.5771	1.52307	1.43789	1.48784	1.29803
MRPS26	22.8885	18.1209	26.0486	17.5411	20.1445	22.8572	17.0333	11.0941	19.0598	27.12	12.7227	20.4597	19.1793	26.8618	20.1433	26.3877	24.127	17.83	9.95528	12.5621	21.9762	25.0804	20.9294	15.6889	23.1995	24.002	23.01	28.2295	17.7168	16.6172	18.6511	25.3764	17.6884	35.6776	21.031	19.1269	16.967	21.1672	16.7721	24.389	19.6726	19.6855	30.0931	18.4656	22.9355	22.1947	16.6589	33.0507	19.5548
ALS2CR12	0.434423	0.784036	3.49343	0.0538193	1.77386	1.21399	0.423098	0.768983	0.549908	4.14972	0.285243	1.41393	0.755009	0.341013	0.931391	0.152515	0.357891	0.212526	0.246122	0.146201	0.48096	0.630355	3.88821	0.484918	0.0678297	1.48854	0.734177	0.636087	0.880376	2.90847	0.447915	0.122778	0.963563	0.067445	0.0946849	0.20976	0.821972	0.0230657	0.528471	0.45765	0.689082	0.179617	0.413961	0.486743	2.38578	2.91077	0.267704	0.238105	0.255055
TMEM239	0	0	0.00328951	0	0	0	0	0	0	0	0	0	0	0	0	0	0.00807677	0	0	0	0.00930354	0	0	0	0	0	0	0	0.00709573	0.00716045	0	0	0	0	0	0	0	0	0	0	0	0.00760038	0	0	0	0	0	0	0.007195
RAD1	4.80427	5.41104	4.06639	6.38016	4.54957	5.4234	4.45406	4.02594	5.19868	3.73507	5.84489	5.28626	4.19598	4.80633	5.43558	4.27656	4.30683	5.32635	4.05772	5.0959	5.46941	4.19254	4.71792	5.46134	4.49074	4.68763	4.23893	4.04154	4.9878	5.09096	4.84277	3.92088	3.91419	4.47512	4.51024	5.56005	6.05017	4.66211	5.21008	4.89213	4.2514	4.03532	4.7283	4.51277	4.99162	4.97861	4.75571	4.01664	6.20816
GALNT1	17.0681	15.5794	12.8602	17.9716	14.9803	13.8041	15.1021	14.0374	14.8328	15.3462	18.0014	15.0292	17.9527	13.7482	16.1376	18.9832	15.3433	14.3372	15.7557	16.8157	12.3971	18.4022	12.7269	15.5491	16.328	16.9658	13.8919	23.4274	14.9558	13.5374	15.8817	18.9278	16.2792	20.1302	15.5204	18.2698	15.3258	12.7757	15.1978	11.138	20.4453	13.8959	12.9469	14.9399	12.1531	17.4228	17.0322	14.3398	13.5699
IGLVI-70	0.151818	0	0	0	1.11289	0.0394338	0	0.118081	0	0.149134	0.148248	0.212291	0.137869	0.274289	0	0	0.483612	0.0844656	0.11086	0.123474	0	0.25924	0.147036	0.974037	0	0	0.23621	0.238759	0.0708117	0.0714576	0.0720547	0.248862	0.0644577	0.0569608	0.119949	0.354306	0	0.155841	0	0.746363	0	0.37924	0.29441	0	0	0.265761	0.0695662	0.169341	0
CCDC157	0.317651	0.416534	1.83313	0.1981	1.1406	0.681858	0.322686	0.650288	0.435191	2.13273	0.267751	0.691414	0.506175	0.497018	0.580882	0.357984	0.243421	0.325114	0.354496	0.277845	0.549793	0.79388	1.11449	0.340831	0.244243	0.662293	0.564163	0.461857	0.452868	0.981701	0.213342	0.294735	0.488571	0.269842	0.248604	0.440596	0.366448	0.216867	0.489436	0.707152	0.512697	0.350333	0.374829	0.326663	1.13223	1.10687	0.280124	0.31086	0.280625
CRHR2	0.0941239	0.153017	0.0835522	0.106788	0.125702	0.0540433	0.183642	0.0751344	0.0679452	0.0583958	0.159634	0.13508	0.155206	0.048331	0.0271773	0.0336243	0.102573	0.231517	0.0542613	0.0120871	0.109064	0.15589	0.0383828	0.0866818	0.0704979	0.0763845	0.0963456	0.0311633	0.138637	0.0349755	0.0423213	0.0406025	0.113578	0.0167279	0.109592	0.251456	0.10873	0.0915332	0.0712002	0.0521876	0.16791	0.0816736	0.158511	0.0726938	0.117506	0.0693755	0.0817193	0.0414425	0.161663
SMAD1	3.90621	1.8393	2.11759	5.96939	1.75255	1.72121	2.10486	2.22352	2.08436	3.44672	2.92041	6.93592	1.24703	1.93886	2.19837	1.83536	2.39211	2.43065	1.83776	1.8998	1.58394	1.42812	2.67882	1.48785	1.74491	2.24377	2.26325	1.70103	2.14259	1.91371	2.48635	1.25499	2.74499	1.87751	2.81855	2.79415	1.59865	1.7808	3.09466	1.77782	3.93323	1.65042	1.68448	1.93958	1.80497	1.882	2.74085	2.07678	2.35746
MRPS2	12.1109	10.4875	12.3196	10.4173	10.2165	11.2161	9.4734	8.07398	9.30574	14.0921	8.52935	10.45	10.0926	11.8955	9.5648	11.4061	10.2444	9.14449	9.72973	5.66758	11.6975	10.3225	10.5891	7.84865	10.093	10.2921	11.3221	9.95152	9.75098	9.08213	8.82729	9.59795	9.41674	10.9992	12.4988	9.01474	8.08695	11.8769	7.22131	11.5771	9.89003	9.82021	11.8187	8.32836	11.956	10.5582	7.83975	11.2171	8.50089
RAMP1	8.92452	1.72907	8.86027	4.11421	7.5485	3.71393	5.78776	6.06433	6.25829	5.09037	4.80243	4.99848	5.96948	3.79692	2.01808	10.3346	9.37439	3.36356	6.11393	2.22433	6.04468	9.48064	11.3232	3.86199	2.35881	5.3706	6.35795	12.5513	4.5207	7.22683	3.32479	6.05618	5.65311	24.465	5.72432	6.80258	7.1461	4.90066	1.71359	3.50457	5.31776	5.80107	14.178	2.01166	5.31121	5.6835	5.27666	3.47875	2.11043
MIF4GD	15.6473	12.0458	9.92594	14.1503	10.2514	12.1727	10.7433	7.56433	12.1847	10.0758	10.953	12.4027	16.8278	12.3325	9.40621	12.8502	11.8965	10.2735	7.75511	8.45821	10.3886	15.8858	10.248	9.98356	11.6425	12.6335	13.5109	14.4113	11.0684	9.64349	11.9643	16.1831	14.0778	17.5441	12.5745	13.1945	9.1889	12.3792	9.28482	11.475	12.3485	10.1971	14.6982	12.8849	11.6443	11.5466	10.4816	13.9433	11.3336
NDUFAF3	22.2905	19.3968	23.7435	19.0639	21.7959	20.554	17.2337	18.9674	21.8502	22.235	13.9197	20.3242	22.7093	27.9693	20.1216	24.7995	23.9571	16.5655	16.7062	13.9677	22.2404	27.2192	19.5937	15.1246	22.9105	19.1986	23.5855	21.8827	18.256	22.5787	19.5001	24.9486	23.5118	33.459	24.7419	20.6361	16.1953	23.5846	15.7013	21.8508	21.7776	24.1118	31.9658	16.5731	25.4158	24.613	21.0225	26.1566	18.8105
GALK1	6.6971	3.80734	6.78445	4.79744	6.65191	8.19229	4.724	3.831	7.22628	4.03373	3.92977	6.01407	5.8214	10.0719	4.19464	8.3128	5.48015	4.48944	5.49603	3.69781	7.28947	7.57889	4.41005	4.01364	7.8339	6.15205	6.75007	6.15191	5.49274	4.57887	4.46161	9.2994	6.41723	11.7336	6.6721	5.30539	5.45835	5.49757	4.92378	6.19934	6.34675	6.96799	8.78226	4.77988	7.84213	6.20232	4.48583	7.12741	4.93998
AGA	6.66238	9.02719	5.64279	9.65925	7.56346	8.80206	7.50189	6.78293	7.58359	6.67507	6.6354	6.71635	7.16584	7.04619	8.68892	12.5396	9.43631	6.67452	5.59232	5.85059	6.10484	9.85927	7.5601	8.00415	7.39742	6.396	9.37863	10.5125	8.03203	4.7715	7.75282	11.0904	7.94095	10.4887	8.46416	6.6636	7.40279	6.60038	6.3625	6.99528	8.30015	6.03778	10.3445	9.00156	8.96288	6.25111	6.79538	7.9992	8.90859
KRBA2	0.24017	0.351527	0.247441	0.243632	0.131443	0.181644	0.224449	0.049447	0.262157	0.26021	0.196585	0.251878	0.221311	0.206747	0.206679	0.0575344	0.123759	0.259382	0.139269	0.224056	0.323992	0.0723718	0.403637	0.271922	0.164493	0.363059	0.153866	0.0333271	0.177916	0.179539	0.231328	0.0578956	0.0989705	0.135165	0.0558104	0.222551	0.110742	0.0761357	0.323035	0.29766	0.159617	0.0846977	0.113012	0.192502	0.167554	0.234943	0.184497	0.189099	0.300676
TMEM8A	20.8547	15.1556	13.7701	12.9728	13.0483	18.4294	13.5535	11.0598	14.1006	15.8125	13.3978	17.3519	24.1519	16.4729	16.946	8.33819	17.2831	13.0151	17.6607	10.1031	15.837	25.5576	12.3448	14.1025	20.0957	15.3971	17.6979	13.1567	16.8854	16.5005	14.5594	12.4621	15.2318	25.3468	28.592	19.7621	15.8708	17.4667	11.4933	15.3447	16.8479	13.5032	19.184	15.137	15.5051	18.6302	17.1192	22.9524	14.9114
ABHD5	7.80866	9.63075	5.74349	11.3648	8.15718	8.85321	8.41332	14.0318	8.50373	4.05229	10.7085	14.4471	13.4931	6.76504	12.3794	10.7607	9.78125	7.3215	15.743	12.7826	7.70534	23.0629	6.86969	9.84198	7.07552	7.53648	7.28475	7.24105	11.3009	10.5869	10.9854	9.34252	9.34373	11.6676	11.4247	7.04618	9.60821	11.4007	12.3571	5.38797	8.89769	7.8055	14.7325	11.8041	7.89589	8.45208	13.0266	9.30679	8.71339
PTPN1	39.4091	51.3423	30.7697	35.1148	48.8447	45.7798	43.142	79.0604	37.4614	24.5833	44.4176	31.3063	35.3736	33.2062	44.9512	20.3475	34.6319	45.1041	125.881	48.4409	35.842	48.8415	28.627	53.5145	41.0513	40.373	32.7932	19.3099	60.6184	54.537	39.499	32.208	50.4045	26.1728	78.3954	43.6576	44.1265	47.9186	34.7151	34.9047	33.0295	53.5175	41.3171	43.943	38.2467	40.0891	38.4907	37.4259	37.8015
TMEM17	1.18471	1.31746	2.36564	1.41719	1.72419	1.44921	1.14496	0.803046	1.06261	2.19425	1.11484	1.0134	1.00974	1.32729	1.42816	1.85081	0.98036	0.729089	0.645197	1.14654	0.801415	1.39493	2.14094	1.23915	1.18161	1.50809	1.23056	1.46762	0.907587	1.56071	0.989484	1.09576	0.961029	0.998246	0.481084	0.903587	1.23475	0.713357	1.08096	1.33869	1.43144	0.902697	1.11662	1.08219	1.59233	1.50616	1.0281	1.21809	1.05175
WIPF1	10.8516	10.4229	6.95653	8.48924	6.46794	6.44101	10.5042	7.37906	11.337	6.52659	9.33394	9.6809	11.9965	8.47711	9.62332	5.5869	10.7769	11.8894	7.1269	11.9424	9.64684	9.71652	9.04701	17.1175	8.13776	14.7767	10.1723	6.79237	7.32728	7.4705	9.31063	7.97008	12.306	8.4319	10.4099	9.94948	5.98745	7.58643	13.8196	8.15614	10.4181	7.00843	7.53422	13.8031	5.27925	10.2954	10.0421	10.4375	8.4675
ROM1	1.58998	0.936624	1.50349	2.19399	1.56562	1.06637	0.82386	1.2828	1.65933	2.09804	1.2861	1.72556	0.700396	2.34096	1.08491	1.84697	1.54969	0.897806	1.01374	0.868525	1.43677	1.26777	1.29474	1.23188	1.17687	1.08418	1.52613	1.81629	1.35039	1.08346	0.946097	1.55601	0.977329	1.99443	1.13123	1.24611	1.02931	1.18146	1.57102	1.34999	1.44273	1.5887	1.89257	1.16077	1.30003	1.09394	1.56587	2.24996	0.897889
TNFRSF10D	3.98296	4.11621	4.92136	11.7604	9.75741	4.29904	4.4411	25.7072	2.9839	4.36463	5.00053	9.02119	2.16565	2.5821	4.24365	2.65798	3.67835	4.69264	15.4281	5.28098	6.50909	3.94763	2.73375	3.81651	1.98462	3.19206	4.94718	1.34226	15.3226	6.89229	5.16277	1.94771	4.99146	1.6953	8.39171	5.253	4.7925	1.95837	20.9259	4.80709	3.12427	9.6735	2.41777	5.96391	1.52167	2.43151	9.35545	4.48001	4.28988
NABP2	9.28087	7.4668	8.27159	10.0894	6.95428	7.80746	7.39829	5.51249	6.89908	9.59755	6.79045	6.88703	7.44231	9.84842	6.28101	11.8981	8.4752	7.03981	5.36057	5.97051	7.85244	7.61239	7.68721	7.14659	7.79345	8.17119	8.55594	10.8314	6.71115	5.74206	7.71583	10.3853	7.30467	12.169	7.36785	8.13002	7.65862	7.63151	7.03399	7.74292	8.47358	6.48161	8.85867	6.73386	7.32702	6.96276	6.98453	10.1089	6.45153
ICAM1	153.268	82.4214	70.4982	147.661	185.329	115.431	99.7146	948.109	92.5356	93.4896	59.6965	134.087	51.1066	72.0174	119.084	50.0197	90.3941	100.362	622.416	317.775	87.8073	235.003	57.5553	112.511	88.6629	112.935	83.3015	43.6183	244.413	158.909	191.47	187.286	132.771	128.241	256.589	152.627	100.046	102.852	509.576	67.8053	117.191	501.642	72.7344	152.219	134.333	104.533	202.193	53.4972	101.358
AL133410.1	0.269508	0.284603	0.430345	0.20855	0.315629	0.21001	0.256173	0.169307	0.434876	0.70259	0.273293	0.695745	0.451839	0.561831	0.492845	0.168856	0.165099	0.103807	0.363323	0.252914	0.418386	0.106201	0.50196	0.435303	0.321845	0.532766	0.2903	0.097811	0.232072	0.204915	0.206628	0.10195	0.171639	0.210013	0.212935	0.580585	0.260012	0.287291	0.135438	0.786234	0.167305	0.217505	0.0753806	0.260755	0.421499	0.471782	0.256489	0.416236	0.97069
HMGB1	19.9382	23.6719	25.2723	30.7279	24.5806	23.5756	24.5315	22.1224	25.3744	23.0713	27.0891	25.1608	18.9336	24.7188	22.8708	44.4912	22.586	24.2786	22.6142	27.7219	25.4258	24.7873	24.28	27.3706	21.288	25.0346	23.2839	44.872	20.615	21.9217	24.3062	32.7835	20.4936	35.0954	16.7806	25.0084	26.1858	22.2753	29.4771	25.3924	23.8077	23.6017	27.0825	24.2517	23.9394	26.4295	21.1587	25.8852	25.6497
AUP1	37.7193	39.7953	32.9888	37.3863	30.1544	38.7749	31.4534	32.0735	31.7133	34.9106	28.59	38.2536	42.1945	37.7206	30.3639	52.414	34.0722	33.3793	30.6374	25.4669	41.117	53.8308	29.6589	32.7247	34.7905	34.5959	33.2429	44.7315	39.6739	32.5661	27.2265	41.134	30.6883	53.0404	38.0067	37.7973	33.9251	32.8118	35.7049	38.2678	28.7227	30.9059	44.0437	32.8441	39.2914	35.7819	27.6252	43.2137	30.6182
KIAA1841	1.00509	1.49167	5.51871	0.8056	2.37282	1.96088	1.42549	1.39734	1.48034	3.06021	1.19366	2.06155	2.12263	1.46431	1.66187	0.814617	1.03052	1.40966	1.01434	1.4943	1.5495	1.55602	3.60432	1.32657	1.06068	2.64427	1.27178	1.10298	1.47897	2.67456	1.02673	0.692217	1.27234	0.925613	0.805816	1.51717	1.52926	0.790906	1.46813	1.71182	1.6063	0.8624	0.867398	1.03019	2.5983	3.35461	0.947134	1.28086	1.28942
THRB-AS1	0.0309056	0.0212138	0.0842024	0.0399726	0.0470528	0.0313074	0.0163668	0.0396624	0.0324148	0.0728622	0.049795	0.0259297	0.0378891	0.0402027	0.0282582	0.121667	0.0295347	0.0309504	0.0913997	0.0527849	0.045361	0.0678516	0.0538777	0.0757088	0.0319863	0.0317691	0.0384682	0.0583251	0.0172982	0.0741879	0.0220023	0.0607931	0.023619	0.0521799	0.0170927	0.0432757	0.077523	0.0428283	0.0605717	0.0260464	0.0299295	0.0555854	0.0382073	0.0259149	0.0471266	0.0595112	0.0212424	0.0361963	0.0175402
PLCZ1	0	0.0199928	0	0	0.0394174	0.00907861	0	0.0135926	0	0	0.00853255	0.0122187	0.0079352	0.00631479	0	0.00790787	0	0.00972301	0	0	0.0106875	0.00426309	0	0	0	0	0	0.0366454	0	0.00822564	0.00829438	0	0	0	0	0.0305887	0.00913264	0.0358784	0	0	0	0	0	0.0244233	0.00986982	0.0101975	0	0.00974658	0.024796
TCEANC2	0.994521	1.11918	1.48603	0.902293	0.941356	0.999994	0.970866	0.408843	1.02882	1.55147	1.0955	1.28631	1.18897	1.09918	1.09476	0.583629	0.899244	1.0615	0.339415	0.767945	1.07155	0.675567	1.42515	1.26611	0.992777	1.47037	0.968042	0.648074	0.535759	0.911767	0.919386	0.595714	0.758391	0.639141	0.548621	0.917219	0.989412	0.86683	1.00267	1.30919	1.09456	0.590884	0.638281	0.867255	0.87961	1.15305	0.814036	0.952775	1.11183
NR1H2	31.069	25.358	27.0383	29.4662	28.8852	26.599	25.7049	27.5659	30.4038	22.3164	25.4267	27.4545	25.1222	33.8561	24.4456	25.1214	29.4832	28.0613	27.7292	22.5698	29.2242	37.1417	26.9835	21.256	25.3766	26.3079	29.1649	19.3278	28.0507	28.8932	27.989	27.8092	30.7449	33.9465	33.2352	28.5526	23.9583	32.0895	26.7562	28.3425	23.053	33.3403	40.9808	26.4907	29.7502	28.3443	27.8393	26.4136	26.339
ORM1	6.98766	3.57097	0.8952	4.6904	1.00049	2.40673	1.81738	4.8045	1.64357	1.35561	2.5026	4.96211	4.92334	2.39827	7.05004	3.24119	4.53554	1.13339	4.17479	3.84811	3.13466	4.58468	1.8457	2.87464	6.06445	0.938204	1.10764	4.27169	3.34096	4.79424	3.89863	6.67867	1.9391	10.2074	11.2321	4.37082	5.66629	3.71009	2.28967	3.55371	1.52027	2.82346	5.89391	2.61739	1.7072	2.45409	4.75768	4.94771	5.62545
EVL	11.5378	14.8947	8.64648	9.41064	8.73879	9.39315	10.2245	6.30657	9.99976	7.62007	7.98033	17.6836	34.6858	10.4445	10.7041	4.4775	9.95933	8.59129	6.57426	8.22908	11.7346	15.8236	10.2961	12.0435	12.1667	14.584	12.5607	5.49409	9.97951	7.68279	12.528	8.37054	10.5136	6.28939	12.7966	17.3228	9.06887	10.5608	13.162	11.6594	8.17593	6.5673	9.26471	16.3958	9.21845	11.7267	10.4349	24.4217	11.9067
FASLG	1.44259	1.13012	0.556053	0.195295	0.371355	0.643514	0.442875	0.0487835	1.79642	0.954994	0.306232	0.526231	0.469908	1.30316	0.802881	1.17782	0.882438	0.610675	0.595403	0.306069	0.901399	0.619656	0.739072	1.77426	0.581526	2.57895	1.41501	1.11792	0.380313	0.265695	0.759094	0.462662	0.459364	0.682443	0.222999	0.878258	0.294992	0.466781	1.5844	0.836947	0.792999	0.109674	0.334485	0.964205	0.425071	1.24435	0.143701	1.04941	0.711939
CLPS	0	0	0	0.0943853	0	0	0	0	0	0.0483879	0	0	0	0	0	0.846997	0	0	0	0	0	0	0	0	0	0	0.0255468	0.154935	0	0	0	0	0	0.0369629	0	0	0	0	0	0	0	0.0492191	0	0	0	0	0	0	0
IQCF1	0	0	0.0171849	0	0	0	0	0	0	0	0	0	0	0	0	0	0	0	0	0	0	0	0	0	0	0	0	0	0	0	0.0377199	0	0	0	0	0	0	0	0	0	0	0	0	0	0	0	0	0	0
CDCA2	0.191909	0.0693302	0.0884532	0.116122	0.0768882	0.184959	0.169383	0.0471357	0.122235	0.178594	0.162739	0.201264	0.295811	0.213507	0.434057	0.281081	0.241311	0.101151	0.342963	0.147866	0.213105	0.147834	0.097823	0.247429	0.254808	0.103827	0.172866	0.230328	0.141334	0.135492	0.186959	0.173847	0.247654	0.170533	0.355121	0.300543	0.0950093	0.147746	0.105578	0.180888	0.252688	0.0454156	0.0477436	0.211736	0.0855653	0.132609	0.0902509	0.185893	0.121814
SP110	1.38283	2.0967	1.99361	1.41297	1.45899	1.76978	1.99953	1.38859	2.08984	1.50807	1.9202	2.02009	2.16564	1.70782	1.26701	1.13568	1.94607	1.99137	1.27219	2.42703	2.0254	1.19502	1.9045	2.56553	1.96379	2.773	1.82946	1.08511	1.31948	1.4533	1.88707	1.55045	1.67712	1.1973	0.597388	1.85682	1.78031	1.36784	2.806	1.83535	1.69367	1.49519	1.39448	2.12139	1.77302	1.95266	1.52154	1.98658	1.71322
ATM	1.75369	2.98204	2.29873	1.46917	2.05253	1.63116	2.57897	1.71788	2.79763	2.47066	2.44432	3.0384	3.10682	2.29984	2.34981	1.05885	1.69449	2.63184	1.49271	2.75763	2.49379	1.44388	2.33569	4.16569	1.95757	3.73476	2.48636	1.08066	1.92179	2.05295	2.44157	0.997366	2.25286	1.19251	1.38627	2.7816	2.28487	1.216	3.42954	2.94586	1.92697	1.28174	1.15568	2.44342	1.58377	2.6937	2.42289	2.66189	2.67143
CX3CR1	6.27458	2.20534	4.41354	1.79256	3.124	3.02955	4.68022	0.98277	7.72415	3.89074	0.925381	3.19396	1.86095	11.3382	1.22444	4.72064	8.9273	5.20035	2.50186	2.06849	8.64864	1.65575	7.27977	7.08633	3.68849	6.82733	16.4542	3.26097	2.02496	2.60767	7.72691	2.25712	1.39964	4.07219	0.797802	2.55187	2.60737	1.7377	5.67958	4.9035	6.85034	1.15733	0.84819	0.679176	2.72635	7.5053	2.79845	2.70134	2.05329
TAF11	15.0396	14.6832	16.6922	17.7357	18.257	15.7783	13.9799	11.6003	13.4339	12.6264	14.1248	20.646	13.4592	14.8814	13.6142	25.6049	11.1812	14.0523	18.2109	16.458	20.0527	18.3741	12.243	17.7916	15.7885	13.4823	12.7105	19.0357	15.6785	14.4105	13.8195	17.8346	12.2908	25.1954	12.3662	16.9444	18.5061	12.0979	20.7279	15.8174	12.5605	13.2926	14.3161	16.0255	12.656	15.3502	11.5048	13.543	15.0117
USP7	12.7423	12.8816	14.3917	10.9728	14.1523	11.8282	13.9681	17.8075	14.0129	14.9183	14.2709	14.1193	10.6134	13.6357	12.2282	7.60823	12.1376	14.1662	17.1336	14.8834	13.0179	8.96615	13.8305	14.2487	11.3936	14.6343	12.2228	6.36431	13.7268	14.9781	13.4812	8.04234	12.7948	6.47848	13.2981	13.6072	13.7332	12.4126	13.083	12.5234	13.539	12.7692	7.75527	12.4135	12.303	14.4543	12.9815	10.9229	12.4817
DHX38	10.3941	8.51886	10.4077	7.58897	10.7072	8.27105	10.6309	9.36453	10.2258	11.1094	10.4844	11.532	8.13592	11.1059	8.42567	4.1066	9.3993	11.0927	9.72305	9.2358	11.2539	5.87634	11.3107	9.51166	9.56134	10.2592	11.1731	3.40591	8.37918	9.54652	9.59095	5.97605	10.4629	5.10579	9.33251	9.80245	9.64577	8.69486	10.3579	11.3878	9.30959	8.18921	6.54334	8.49447	9.52544	10.6075	9.59666	9.1729	9.00707
GRIN2D	0.368142	0.252695	0.0854691	0.256173	0.117997	0.383498	0.198379	0.280306	0.178209	0.188431	0.181635	0.300743	0.527871	0.168031	0.297632	0.426103	0.327124	0.407485	0.224963	0.085096	0.327043	0.209858	0.270224	0.122052	0.250668	0.29212	0.569769	0.176737	0.607315	0.186045	0.148976	0.152454	0.20484	0.126493	0.385779	0.379837	0.0607527	0.280441	0.106329	0.269437	0.275205	0.0755054	0.174721	0.284324	0.321718	0.217076	0.388877	0.181543	0.247424
GTF3C6	21.364	23.6154	23.9377	28.1501	22.1534	26.9244	20.7012	21.8389	20.6091	28.318	18.8026	25.5287	34.2418	23.3796	32.4383	30.7592	27.0451	16.4245	21.6785	26.5371	23.1781	29.5094	22.0167	26.6045	26.3706	22.6264	21.8577	32.2314	25.8824	23.0627	21.0958	27.8343	19.437	31.1672	24.6543	24.3789	23.9527	24.0093	20.7363	23.0324	24.1226	22.8717	23.311	25.5141	24.1625	25.7094	18.8416	31.6287	21.5205
CNTRL	2.4542	3.8554	6.16007	2.05711	4.17288	3.44427	3.1003	3.53322	2.94892	5.86749	3.45045	4.21134	4.1767	2.99664	3.08906	0.605996	2.03957	3.10281	3.35158	3.49771	3.39908	2.01228	5.79508	3.79555	2.30196	4.54213	2.79127	0.70535	3.13498	4.73796	3.17509	0.992858	3.27278	0.625135	2.31989	3.68302	3.79826	2.42996	3.65849	3.95209	2.49644	1.51092	1.21471	3.87503	3.6965	5.52886	3.14898	3.49605	3.44052
AURKB	0.686939	0.181354	0.319927	0.265782	0.46184	0.171566	0.466392	0.143847	0.362374	0.376329	0.219295	0.628064	0.827767	0.420062	0.628096	1.17162	0.603166	0.235192	1.30227	0.171905	0.613992	0.534939	0.281474	0.585584	0.660828	0.407384	0.548099	0.38781	0.40667	0.0497429	0.275872	1.16935	0.611356	0.812854	0.890655	1.04821	0.165683	0.379693	0.287678	0.408223	0.597013	0.184797	0.102472	0.461548	0.253664	0.323752	0.193705	0.898842	0.374872
SNORD116-1	0	0.356503	0.134766	0	0.351438	0.323772	0	0	0.167612	0.306117	0.304298	0	0	0	0.759819	0	0	0	0	0	0	0	0	0	0	0	0	0	0.290701	0	0	0	0.132308	0	0	0	0	0	0	0	0	0	0	0	0	0.363673	0	0	0
SDR16C5	13.0973	22.971	12.5958	26.9702	25.1596	21.3779	17.7757	48.4743	15.2045	9.53406	27.0304	21.7147	15.9798	10.035	48.43	37.6835	23.5737	17.0283	46.8417	30.2235	21.4341	20.2533	18.4209	28.0148	29.3252	13.0755	11.9448	29.0319	56.1848	31.6931	21.8795	46.096	27.1548	18.6105	30.6447	14.0223	48.7947	56.8022	22.2642	20.5316	21.2172	27.7945	18.5019	24.5917	29.7269	24.4129	28.645	28.2379	24.7577
RN7SL832P	0.112393	0.115721	0.488489	0.177671	0.323218	0.332807	0.218243	0.144239	0.199493	0.182171	0.164626	0.542214	0.199031	0.207122	0.226085	0.0762866	0.26852	0.243873	0.307769	0.0822691	0.371167	0.0329006	0.315674	0.235996	0.101783	0.30809	0.201101	0.212109	0.298813	0.238056	0.272052	0.110542	0.178947	0.151809	0.0355203	0.491811	0.211444	0.0692233	0.396504	0.331528	0.253969	0.235837	0.147121	0.117805	0.266597	0.255773	0.185404	0.319683	0.127576
ACR	0.191708	0.197384	0.36686	0.358151	0.372944	0.0821617	0.28765	0.257209	0.71921	0.155363	0.463319	0.663475	0.104456	0.0415629	0.0175286	0.0520483	0.244272	0.207985	0.524957	0.304038	0.738608	0.0771621	0.083551	0.251584	0.310017	0.229908	0.201335	0.0452239	0.214602	0.0812097	0.450386	0.1257	0.183136	0.129469	0.340798	0.26844	0.330602	0.132832	0.450873	0.363524	0.309421	0.488462	0.278824	0.140657	0.0974423	0.201354	0.395301	0.080188	0.136003
CRYAB	16.4578	8.78509	13.9632	16.3222	16.6052	10.589	15.6973	11.2776	18.0277	10.1602	13.4251	13.0167	5.27233	19.1733	4.25864	26.2179	14.3808	11.9324	17.3141	13.7608	19.0117	6.10772	18.3523	11.2344	13.263	10.8772	16.0975	13.0948	9.89427	16.4327	11.6796	15.3656	12.2544	31.6746	4.88258	5.67018	19.6112	10.1063	12.8342	14.4047	12.5992	16.5843	18.4586	5.05914	21.5468	11.8314	17.0171	6.59557	6.89459
MSANTD3	5.40579	4.34149	4.78185	5.98993	4.73139	5.52667	5.00155	5.81839	4.8117	4.83642	4.76325	4.6449	4.03308	5.26148	4.14946	7.24772	4.54176	4.5063	8.16064	5.47719	5.19821	4.48441	4.4305	3.87486	5.35307	5.08284	5.35701	6.78405	4.77114	4.66902	4.21563	6.27548	4.60963	7.64847	5.73308	5.06544	4.40389	4.39067	3.53556	3.84768	5.00396	5.59241	3.88262	4.37515	5.2939	4.97046	4.2285	4.93342	4.68294
RRAGD	6.59174	13.7555	6.52507	6.69366	7.46458	8.22022	7.28112	6.17411	6.03711	6.11781	11.6157	5.86836	14.2638	6.48331	11.0437	4.46883	7.69755	5.67645	4.3602	7.09221	5.53992	14.5402	6.08261	7.25133	11.0247	6.55324	6.50229	7.74131	6.97493	6.30227	8.49911	9.72731	7.11481	6.66616	9.93957	8.3229	9.33365	8.16645	5.2673	4.63218	6.81439	8.10086	11.5935	8.36925	6.57966	7.20679	8.01301	9.01708	8.62945
POT1	2.78457	3.176	3.30002	3.62651	3.13087	2.81139	2.60543	2.30375	3.33746	3.19069	3.64724	3.62933	2.8585	2.99313	3.07239	5.18391	2.78259	2.98859	2.16654	3.79719	3.21138	3.0126	3.10852	3.543	2.95295	3.17085	3.25975	4.89503	2.32284	2.65121	2.89734	2.95157	2.8178	3.82739	1.92505	2.68884	3.00127	2.47874	3.54648	2.84178	3.18171	2.42284	3.71164	2.56784	2.52337	3.03483	2.69146	2.82225	3.10088
MBTPS1	16.5266	14.5223	18.8203	14.6773	16.0998	15.4633	15.0989	13.2357	15.6619	18.9291	16.7328	16.7844	10.7296	14.931	13.6991	10.6717	14.5107	15.9302	11.4339	12.2574	15.5335	11.7347	17.0123	14.8384	14.3103	16.8272	16.0315	11.7327	12.9856	14.5903	14.8329	10.6618	15.3942	12.6588	11.4658	14.1344	15.779	14.6513	12.8786	15.0524	15.355	13.3659	11.1113	12.5275	15.6286	16.4106	16.2446	12.5596	13.9413
CAPZA3	0	0	0	0	0.0307144	0	0	0	0	0	0.0265946	0.0380836	0	0	0	0	0.0289188	0	0	0	0	0	0	0	0	0	0	0	0	0	0	0	0	0	0	0	0.0569298	0	0	0	0	0	0	0	0.0922878	0	0	0	0.077285
ARID3A	2.20083	1.88833	2.59607	0.759226	1.39381	1.8984	1.66708	0.94211	2.25265	1.48431	1.32713	2.2507	1.89795	2.72995	1.24142	0.460775	1.7178	2.35754	1.57111	1.26231	2.89273	1.08976	1.95123	1.73389	1.70338	2.509	1.63332	0.693097	0.923106	1.05908	2.79065	0.63717	1.18894	0.687085	1.79724	2.36208	1.51059	1.37404	1.9278	3.09133	1.82912	1.10363	1.15258	2.43304	1.88297	1.59088	1.8476	2.72049	2.11284
TNIP2	14.3062	9.63328	12.3118	10.1477	12.5417	11.0792	10.1302	12.5502	14.2929	11.1517	9.96615	13.7013	9.44859	16.7269	11.4348	10.4933	12.7331	10.8415	18.6077	10.7031	14.6941	13.8357	10.6034	11.5199	11.8635	13.4068	13.4216	9.74148	15.4328	11.7865	10.5982	11.2979	12.5599	15.9539	16.6152	12.308	10.621	11.9474	12.9033	12.5399	11.9545	12.5437	12.2365	12.6769	12.051	14.2261	11.3129	14.1994	10.0398
CELF1	7.65937	9.72471	13.1768	6.68526	11.0734	8.83628	7.82145	10.2658	9.29067	10.7317	8.57198	12.1284	13.1345	8.76599	10.301	3.27425	7.23774	10.1465	12.636	11.3227	10.0121	6.96783	11.5885	10.2865	8.27054	12.4357	8.43339	4.37889	10.3737	12.569	9.69457	5.04445	8.82773	4.47869	9.38353	13.2442	9.89199	7.6431	10.5758	10.2872	8.32908	7.3123	5.13148	12.2047	10.4311	11.8329	8.71013	10.247	11.9886
PSPH	2.42238	2.37884	5.69218	2.12567	4.5692	3.76962	2.52277	2.44264	2.69229	5.29609	2.14562	2.57793	3.29972	4.25257	2.54809	3.82187	2.66319	1.68167	1.33056	2.07474	2.1369	3.7285	4.02777	2.26309	2.04301	3.66041	3.01291	3.06791	2.04975	3.20861	1.96364	2.44807	3.39488	4.15018	2.01551	2.36386	2.2181	1.55136	2.95967	2.07765	2.46812	1.54222	3.175	1.64774	2.80877	4.00278	2.18068	3.08455	1.55121
HOXC4	0.492502	0.0994284	0.591982	0.228984	0.134771	0.276543	0.319628	0.126748	0.251265	1.55811	0.137911	0.227872	0.069061	0.219834	0.238402	0.304788	0.426821	0.435191	0.150729	0.194387	0.385348	0.0742044	0.806672	0.253461	0.0936992	0.359843	0.709929	0.216416	0.20269	0.143177	0.0824994	0.0237446	0.378231	0.342392	0.211727	0.291571	0.193029	0.167279	0.0473164	0.259417	0.315627	0.0759871	0.142208	0.0607312	0.233152	0.304285	0.298688	0.41201	0.184973
DMP1	0.0073588	0	0.0429623	0.0211505	0.0248968	0	0	0.0171706	0	0.0216861	0	0	0.010024	0	0	0	0	0	0.0241809	0	0	0	0.555906	0	0	0.0126073	0	0	0.051485	0	0	0	0.00468652	0	0.0058141	0.0128802	0.0115367	0.0113307	0.00961499	0.0155045	0	0	0	0	0	0.0257636	0.0101159	0	0
AL121987.1	0	0.0525082	0	0.0439733	0.103524	0	0	0.142796	0	0.270522	0	0	0	0.0331698	0	0	0	0	0.0670317	0	0.112277	0	0	0	0	0.0524231	0.261845	0	0	0	0.043568	0	0	0	0	0	0	0	0.319844	0	0	0.0458615	0	0	0	0	0.0420633	0.051196	0
IHH	3.57068	2.47772	4.32877	1.68242	2.42601	3.01806	2.01494	1.37722	2.84145	2.09879	1.07174	2.6602	1.08973	6.04926	1.51644	1.07273	2.3308	2.00287	1.46398	1.80908	2.38055	1.24942	1.67241	3.26051	2.7767	2.65756	2.98269	1.16606	1.96579	3.31997	2.94488	2.94255	2.50391	3.28334	1.04059	1.6393	1.31535	1.90776	1.87383	1.50053	1.98404	2.47115	1.29123	2.31101	3.58688	2.4934	2.7627	1.58333	2.46393
SCARB1	4.93344	6.5583	5.60504	9.31381	4.02398	5.39195	5.66181	5.9669	3.45986	4.5006	4.92946	16.1983	6.37989	5.05497	4.4106	4.10825	7.92671	5.9534	2.1196	3.54583	5.37925	5.53217	5.4966	4.54595	5.97343	3.69098	11.5217	2.47395	4.54152	6.22459	4.26548	5.6964	5.13259	3.45804	6.62534	5.38633	2.49418	5.17803	5.31672	9.91633	5.81874	7.78017	8.73088	4.33988	3.24843	4.25335	4.74202	5.19572	8.94241
WDR83	2.50049	2.26742	3.63469	1.87483	2.67375	2.59361	2.33247	1.79523	2.57065	3.69675	2.00888	2.57853	2.43783	2.98254	2.20219	2.24779	2.19777	2.1077	1.41065	1.7752	2.89982	2.53983	3.13447	2.00473	2.65068	2.7079	2.68038	2.51203	1.73189	2.19641	2.01234	2.11111	1.91202	2.40032	1.94918	2.23956	2.09772	1.86712	2.84099	2.97777	2.06517	2.10574	2.75494	2.19137	3.30139	2.59117	1.72442	2.75645	2.38499
MSX1	1.48953	0.41536	1.40106	3.23764	1.27562	1.08089	1.24896	3.41043	1.1717	1.02881	0.422715	1.24972	0.240946	2.22019	0.527751	1.12475	1.40863	1.30523	2.10059	2.15788	2.76694	1.25357	0.405735	0.651586	0.734677	1.27596	2.46237	0.761326	1.86282	1.41971	0.94113	0.778281	0.69368	2.28434	1.21364	0.89621	0.612989	0.946073	3.17477	1.23572	1.17202	4.18595	0.866564	0.878204	0.252369	0.880021	1.89404	0.981296	1.17559
CHRNE	0.261556	0.538602	0.247233	0.375879	0.240191	0.19799	0.197877	0.43593	0.186906	0.220228	0.197027	0.830758	0.203593	0.210624	0.314314	0.284048	0.178539	0.324302	1.33422	0.273504	0.191947	0.437512	0.231605	0.8761	0.212695	0.62735	0.476712	0.164537	1.00386	0.295463	0.308572	0.159249	0.471169	0.420574	0.82661	0.104642	0.175737	0.195613	0.419863	0.125962	0.156802	0.313616	0.293462	0.469971	0.164599	0.170063	0.359553	0.287578	0.318095
SDC4	175.179	252.473	207.804	307.746	264.946	258.232	198.21	820.584	191.303	265.881	248.934	194.96	124.319	149.876	363.428	263.817	207.652	210.824	640.101	402.415	201.14	259.107	200.166	287.321	220.426	196.498	185.748	290.918	505.617	411.553	278.088	439.582	284.619	267.69	443.902	231.898	387.365	366.855	333.302	228.81	228.714	523	197.716	354.767	310.843	243.072	291.43	268.165	315.03
UBASH3A	1.50688	1.00804	0.650287	0.477148	0.345639	0.577154	0.338138	0.387364	1.34968	0.780891	0.392801	0.616064	0.391394	0.754449	0.677224	0.294702	0.793243	1.30018	0.174844	0.6699	1.46431	0.476617	0.834835	1.80994	0.487366	2.59258	0.879195	0.572373	0.330577	0.18032	0.563663	0.334929	0.72382	0.467148	0.393493	0.771139	0.360365	0.344101	1.0929	1.41256	0.525591	0.267958	0.190376	1.19127	0.281272	0.883005	0.351094	1.47427	0.933129
ASB5	0.00485637	0.0166672	0.0913584	0.0139581	0.041076	0.0189212	0	0.056658	0.0587715	0.0787136	0.0213398	0.0305587	0.0264611	0.0052644	0	0.145035	0.0928192	0.0243171	0.015958	0	0.00890979	0.0390937	0.0611442	0.00849755	0	0.0166402	0.0188898	0.0840122	0.0475679	0.0068574	0.0345735	0.00796064	0.018557	0.0437297	0.00767392	0.0085002	0.0380676	0.0224328	0.0317266	0.0409282	0.0705449	0.0291148	0.0671006	0	0.0246843	0.0255037	0.0133518	0	0.013781
PHB2	58.7192	54.5083	42.5069	59.8581	41.977	47.0791	41.4616	36.3216	42.277	55.0551	43.241	43.7657	47.6368	56.0675	42.0127	97.0789	47.7371	38.8602	30.9776	31.6986	43.8744	68.5814	39.6443	42.1898	52.3841	44.5561	56.61	73.1564	41.0215	39.0984	43.6645	65.701	44.9103	74.7157	50.0062	47.0827	45.4277	50.089	45.1048	48.1225	44.1049	42.1042	82.5884	50.8431	42.9126	45.3879	43.3615	59.0395	42.3462
SPARC	499.38	201.328	213.685	502.51	357.446	154.072	267.148	157.763	271.973	206.632	344.021	375.322	85.2278	301.644	100.378	333.354	267.693	238.187	355.178	273.15	267.302	117.481	264.052	305.03	274.717	200.777	278.959	245.315	166.014	107.044	235.101	359.83	381.407	717.235	182.318	169.678	219.485	137.15	272.842	172.013	475.246	188.781	150.741	155.096	143.1	211.385	335.151	129.912	117.86
CNOT10	4.87095	5.41633	6.21117	4.78176	5.32559	5.67436	5.23383	5.0461	5.01747	6.73919	4.999	5.71492	5.1927	5.52743	5.5783	4.9979	4.8456	5.77803	3.35017	5.11757	5.40974	4.08324	5.89295	6.08586	4.55759	5.88202	5.0091	4.56677	4.62746	5.40002	4.80727	3.91883	4.25114	4.23115	3.65863	4.50522	5.61235	4.40221	5.3001	5.62049	4.98925	4.60253	3.88577	4.96034	5.65136	5.44685	4.53487	4.74265	5.07358
DOLPP1	6.31842	5.02972	5.2657	5.22107	4.34961	5.85352	4.95715	2.7848	4.90651	7.21532	4.08752	4.65691	7.19628	6.36413	5.15133	5.61092	5.81453	4.78964	3.24891	4.00398	5.23257	6.31295	5.53296	4.74478	5.32459	5.63798	5.4615	7.19037	5.50121	5.45226	4.61067	5.66772	4.6499	6.79578	7.65457	5.60643	4.54009	5.81026	4.41447	5.23255	5.29735	3.70909	5.80097	5.70283	6.05142	5.19233	3.69143	8.11954	5.25444
HLA-DOB	4.50387	3.33574	1.99828	2.97672	2.28207	2.19348	1.85636	3.04863	2.66529	3.58427	3.65632	2.67364	2.21384	1.66965	4.56484	1.78805	4.48343	3.33316	2.14083	3.11011	3.11814	1.48476	2.55136	5.46448	3.3531	3.7125	2.64433	6.1476	3.5524	1.42492	2.31405	3.49987	3.48394	3.39557	2.19886	5.16871	3.8302	1.45566	2.77582	3.67041	4.08045	2.34034	2.54915	8.41714	2.17767	2.93796	1.83987	3.51897	4.43103
STRA8	0	0	0.0257861	0	0	0	0	0	0	0	0.0291121	0	0	0	0	0.161884	0.0316564	0	0.0435402	0	0.0729293	0.0145452	0	0	0	0	0.0154619	0.0312575	0	0	0	0.0325801	0	0.0894852	0.0157033	0.0347883	0.0311595	0	0	0	0	0	0.0144536	0	0	0	0	0	0
ZNF35	2.34938	2.44184	2.06248	4.17507	2.6955	2.40245	1.96242	1.92818	2.46949	2.29329	2.45335	3.03131	2.66522	2.21738	2.85966	3.66212	2.58514	2.5235	4.44856	2.83902	2.58347	3.00474	1.76575	3.06047	2.19567	1.96808	2.45035	2.35442	3.27707	2.58487	1.91001	2.07743	2.98773	3.30343	3.6773	2.65929	2.30056	2.72737	2.99223	2.07681	2.36849	1.87726	1.8648	2.28383	2.18489	2.5169	3.27037	2.38081	2.31342
NIPSNAP3A	8.58166	9.70833	10.1481	16.3813	11.2881	11.8214	10.6877	7.17051	9.34446	7.60496	11.664	10.5694	11.2634	12.8781	9.39633	24.9574	9.58244	8.78017	8.32094	12.7792	10.7998	18.0807	10.574	12.6113	9.3045	12.1125	9.47352	26.56	10.1172	9.16371	9.05548	18.2223	9.01485	32.7334	9.0303	10.1697	10.6769	9.62809	12.2303	9.42657	10.7949	10.6651	15.1797	9.47501	7.70971	11.8282	9.73981	10.5004	10.0312
MRPL15P1	0	0	0.058327	0	0.0380257	0	0	0	0.0181357	0	0	0	0.0306201	0	0	0	0	0	0.0246215	0	0	0	0	0.0393326	0	0	0	0	0.0314539	0	0	0	0.0143158	0	0	0	0	0	0	0	0.0362812	0	0	0	0	0.0393496	0	0	0
PPARA	1.89913	2.04708	2.061	1.56415	2.14933	1.80795	2.05837	1.9178	2.05499	2.52114	2.28528	2.07	1.40127	1.7091	1.90573	0.982983	1.85008	2.57921	1.20362	1.54457	2.22149	1.08606	2.35553	2.17879	1.7635	2.50163	1.91296	1.14584	1.60029	1.97118	2.22149	0.966719	1.81422	0.91588	1.54884	2.07755	1.8819	1.55635	1.76936	1.93461	2.26279	1.63803	1.18238	1.94362	1.84915	1.77462	2.18171	1.6462	1.93197
TNNC1	72.1862	65.7638	65.0114	69.7414	67.2591	108.523	68.277	41.7737	60.8297	39.5633	34.5266	34.9463	42.9967	93.6559	36.4931	172.22	43.5458	46.8458	44.0498	72.1086	66.0945	45.0365	48.8339	43.9363	94.8963	54.7722	55.4334	151.872	59.1581	63.3006	54.9757	127.386	39.0637	69.8394	26.9013	50.9891	77.0355	58.7486	46.2098	67.1809	42.4096	72.7867	56.7586	45.0216	95.6216	80.0128	52.9144	58.4377	45.6726
EXO1	0.181154	0.114529	0.0958662	0.137018	0.0725795	0.0817251	0.244045	0.116798	0.126924	0.189659	0.139654	0.219983	0.344173	0.129194	0.261532	0.304159	0.220195	0.151181	0.391625	0.139579	0.131193	0.143038	0.170831	0.26693	0.228194	0.138845	0.178013	0.24741	0.160096	0.107704	0.0950287	0.226621	0.176091	0.257562	0.43315	0.267013	0.0523163	0.0734034	0.174408	0.110486	0.176972	0.100031	0.0970698	0.19987	0.105001	0.116832	0.163833	0.231309	0.128516
CCL25	0.0399116	0	0.0258903	0	0.0337579	0.0777511	0	0	0	0	0	0.125572	0	0.0648974	0.0729856	0	0.0317844	0.0666159	0.0218582	0	0.0366121	0.014604	0.0193272	0.0349181	0	0.034189	0.0155244	0.0941517	0	0	0.0284139	0	0.0127091	0.0224618	0.0157668	0.104787	0.062571	0	0.0521485	0.0420456	0.0322092	0	0	0.167333	0	0.0349332	0.0548652	0.0333887	0.0566288
TARID	0.43931	0.366162	0.473875	0.284999	0.450137	0.344281	0.518471	0.342663	0.356458	0.181248	0.562575	0.505482	0.160719	0.397303	0.0964028	0.364631	0.411827	0.657826	0.406948	0.704377	0.658604	0.167177	0.590798	0.808225	0.324765	0.692428	0.652266	0.197397	0.326678	0.265853	0.443216	0.485569	0.436455	0.344721	0.152721	0.25924	0.28336	0.398126	0.524801	0.682297	0.287675	0.16555	0.385191	0.247334	0.357272	0.470204	0.389949	0.189006	0.292068
ENPP1	0.718635	0.477759	0.669931	0.160725	0.591732	0.211385	0.453661	0.669064	0.691143	0.375172	0.895759	1.09806	0.298212	0.546858	0.221927	0.587909	0.481338	0.444834	1.18071	0.859286	0.606837	0.374406	0.806621	0.51214	0.960491	0.827588	0.475751	0.333065	0.376257	0.312487	0.681019	0.694317	0.566783	0.610677	0.319614	0.408174	0.738653	0.289454	0.609396	0.245668	0.556904	0.724003	0.430885	0.259393	0.290283	0.595672	0.464502	0.187124	0.415283
DNAJB1	39.9563	33.7848	55.0917	48.5458	73.7832	62.8779	42.278	68.4065	32.7353	46.0768	39.245	51.0133	21.2176	36.9743	57.8131	52.3506	33.3695	54.1401	132.138	81.0843	51.1487	48.4788	38.0575	50.2399	47.2556	35.0652	39.5423	29.8046	60.054	102.245	46.0703	68.3164	40.2339	40.9932	51.6171	41.9204	54.8384	49.4566	76.9409	45.8297	35.4638	68.5302	38.4374	86.7799	52.8175	44.5693	46.7327	27.5358	29.5358
FLII	34.3805	27.0052	27.2453	22.4402	26.0431	26.0126	30.1888	26.4556	28.3957	30.9434	24.866	27.7516	34.5194	32.2159	26.5284	14.1191	31.4591	29.4818	30.8065	23.5374	29.5724	26.3465	27.6061	26.4093	30.5409	33.6089	31.7142	12.5547	27.3304	30.1531	29.3967	19.8666	34.7137	17.8302	42.0914	29.7839	25.3705	27.7097	24.9657	28.0694	30.9532	24.845	22.4778	28.5484	29.7563	31.7434	29.7495	31.6679	27.3056
PCCA	3.29098	3.38074	2.79043	3.67232	2.91071	3.08281	3.3366	3.09324	2.74546	3.35533	2.86225	3.24681	4.18667	2.83596	3.44479	3.18672	3.01562	2.95198	2.01429	3.08235	2.705	3.27907	3.0851	3.35211	3.21904	3.13417	3.3265	2.6356	2.83729	2.96252	2.4727	2.61606	2.78027	2.86908	2.71135	2.82695	3.39448	2.6346	2.97531	2.63474	2.75137	2.56452	2.99562	2.50076	2.75271	3.10163	2.49721	2.7665	2.31429
CLCNKB	0.355911	0.760556	0.257014	0.347418	0.454394	0.879109	0.272647	0.18803	0.346745	0.445271	0.285247	0.450731	0.448227	0.218386	0.466646	0.291711	0.363655	0.280211	0.213309	0.131078	0.308008	0.324349	0.24064	0.141003	0.234567	0.230098	0.323894	0.739268	0.667158	0.0758584	0.181669	0.506361	0.504652	0.778535	0.244062	0.493665	0.410586	0.186119	0.324646	0.367867	0.303484	0.241557	0.327191	0.380087	1.26292	0.188086	0.341558	0.325832	0.285841
CD244	0.911863	1.76629	1.15167	1.36999	1.14522	10.6798	1.65844	0.757587	2.21821	1.19093	1.72013	0.985294	0.997463	1.93202	1.04851	2.64449	1.45236	3.33221	0.59776	1.11243	2.43339	1.04647	1.0504	2.85265	1.40311	1.46755	4.92262	2.88985	0.647641	1.21931	2.47866	3.12537	1.14386	1.92056	0.775031	0.834299	2.15517	1.87206	2.53632	1.45548	1.17073	0.931838	0.65307	0.839917	0.620323	1.91065	0.560279	1.34074	3.12668
MAGI2-AS3	2.8624	2.52588	4.17839	3.18395	4.38261	3.53489	4.02789	3.38306	4.52971	3.47723	3.88925	3.73195	1.33439	3.26117	1.83484	4.82599	2.193	4.08334	3.77496	5.50933	3.81561	1.15671	3.2836	3.29447	3.27921	3.80158	3.36657	2.68334	2.91013	3.05414	3.58972	2.87203	2.7528	3.50467	1.72098	2.85273	4.46354	2.32656	4.12377	3.2086	4.12127	4.05605	2.047	1.58375	2.97139	2.87685	3.55676	1.74978	4.07578
MRPL43	14.8091	13.4504	14.2719	16.67	12.3623	14.2041	10.5113	8.48726	11.1369	14.3249	10.3238	12.1885	11.9863	16.6222	11.0001	25.2922	12.5458	10.3444	7.79278	8.47731	12.1205	20.3614	11.839	11.0184	12.6915	12.3119	13.5832	20.067	9.89342	10.7012	11.412	17.0317	10.9299	25.7462	10.9062	12.5591	12.0198	10.64	10.7754	12.8252	11.5544	11.16	20.3296	11.3131	12.494	14.1948	9.79534	13.8074	11.3563
HES2	0.554821	1.39054	2.43648	0.257033	0.734788	0.341317	0.296397	0.600451	0.397564	2.40415	0.705732	0.482338	1.4469	0.989204	0.493945	0.178381	0.459284	0.15231	0.383817	0.13359	0.662979	2.02479	0.558556	0.78559	1.09555	0.787946	0.462852	0.361649	0.388174	0.767968	0.997865	1.13086	0.704362	0.423176	1.03821	0.690002	0.703863	0.427144	0.333849	0.415292	1.26076	0.946451	1.42808	2.02007	1.0699	1.18848	0.115408	0.635144	0.719883
INTS6-AS1	0.0520113	0.116714	0.246557	0.0948684	0.13536	0.13094	0.109469	0.0630141	0.140413	0.162119	0.096693	0.146857	0.147148	0.143122	0.0841376	0.0868984	0.0573511	0.113523	0.0525872	0.0927369	0.135794	0.0761255	0.240241	0.196017	0.0905794	0.219342	0.136947	0.0912347	0.0699791	0.129936	0.0826008	0.0688621	0.0828098	0.0607944	0.042674	0.0980392	0.0909487	0.0708441	0.117619	0.143303	0.0645752	0.0779544	0.0756465	0.100644	0.14913	0.224117	0.0714982	0.110451	0.161785
NPAT	2.53318	3.23214	3.29161	2.74442	2.33981	2.2189	3.4821	1.81541	3.56337	2.41249	3.95215	2.84624	2.76195	2.45353	2.84554	1.93809	2.46171	3.16998	1.67857	3.57295	2.8981	1.71196	3.23482	3.557	2.4435	3.72058	2.9244	2.08051	1.78881	2.53013	3.26743	1.73913	2.55089	1.92248	1.55644	2.87491	3.36355	2.25881	3.44334	2.44509	3.28951	2.36755	1.99647	2.99288	2.29909	3.32925	2.97092	2.28353	3.18164
ODF3L2	0.170238	0.0973772	0.294486	0.114169	0.230385	0.0795932	0.200342	0.145649	0.256382	0.0836145	0.033247	0.380879	0.0927583	0.504413	0.0622623	0.138658	0.144611	0.170485	0.174036	0.138456	0.229042	0.0913611	0.131901	0.218444	0.073413	0.272214	0.203067	0.0892429	0.0794036	0.0801279	0.177754	0.130227	0.166241	0.204391	0.0538013	0.278107	0.160134	0.157275	0.13346	0.286945	0.18318	0.102061	0.222839	0.0237913	0.153831	0.178804	0.187217	0.0759549	0.144926
NOL10	5.26955	5.57968	4.66042	5.77046	5.11625	5.55404	5.79443	6.74396	4.61788	6.25883	5.76049	5.34781	5.1955	5.24792	5.68175	4.67316	5.02266	5.53908	7.20779	6.68678	5.60564	4.44178	5.22853	5.39143	5.22813	5.82706	5.63716	3.68503	6.41305	5.82294	4.78399	4.39088	4.9567	4.49639	6.23084	5.40214	5.26748	5.74562	5.75227	5.05652	5.03981	3.77494	4.06103	5.33393	4.94064	5.62866	4.7039	4.72351	4.36447
SLC15A2	12.9573	11.4365	15.0005	13.9667	13.5428	17.8681	16.9878	9.90369	14.5898	9.51107	14.361	11.1458	7.47656	16.1268	10.5194	11.6141	9.08116	13.4684	9.60091	13.671	12.8453	7.38913	12.2137	13.3576	14.9046	14.9789	10.8415	13.3151	10.384	11.5154	13.6117	10.1536	9.84895	8.11677	5.98626	10.0019	18.9186	10.8539	9.79589	14.2695	20.5185	11.3178	8.01982	10.5532	19.1049	13.0018	12.8227	10.8689	13.1267
LDB1	23.4926	19.7259	22.6228	15.5335	18.3925	18.2455	21.8527	13.931	22.9944	21.1281	19.2307	24.7639	18.5011	25.9801	16.0406	10.131	18.2299	25.4913	12.2578	15.9308	21.5829	16.7936	21.8003	20.3615	19.2001	26.9291	21.5831	7.22011	14.5606	15.5424	21.5544	10.8768	18.0159	13.2014	13.5758	24.4909	20.5721	14.846	21.7576	27.0364	18.5763	16.6564	16.0604	18.8774	18.0019	19.4911	21.0045	19.5406	22.7837
SDHD	22.4265	24.8103	22.3143	33.5063	22.2888	29.324	23.717	20.4195	24.1862	21.6399	26.673	20.6407	26.9595	24.9503	25.8782	58.0045	22.9027	21.0595	16.9823	26.8124	23.1486	34.5685	20.7831	27.9135	23.7623	22.6677	23.4129	49.125	20.0437	20.5376	22.602	39.07	20.1839	44.031	19.0862	19.8127	24.5163	22.056	25.0268	21.1313	22.3327	23.615	33.9791	24.438	21.5107	26.1906	21.0861	23.7954	20.9492
FAXDC2	14.3253	11.691	26.6532	8.71855	22.5644	11.2437	16.7299	9.23328	27.0023	10.7152	18.4129	11.5271	7.21063	18.1092	9.68501	8.68825	13.7674	15.5631	6.25303	14.4625	21.0127	7.36767	20.2659	16.3202	16.3197	15.1601	17.3265	5.6559	8.95951	15.5588	11.7744	12.888	12.5832	8.71732	3.5151	6.61527	17.2487	15.4217	11.4547	16.0356	19.6634	14.86	11.6139	6.86306	13.5617	14.4759	12.1341	5.11644	10.6707
NAP1L5	2.51699	2.67032	3.00625	6.7577	5.42298	1.94145	3.15222	3.28373	4.06826	2.53097	3.56216	5.43991	1.22781	2.39663	2.03704	4.28254	2.85771	4.61267	2.17015	4.73042	3.46337	2.15312	2.58595	4.30002	1.36411	1.90844	4.04844	2.76821	3.62906	1.94515	3.23268	2.20234	2.86477	3.30206	2.20364	2.21765	4.71919	1.45333	6.16631	3.17113	2.59396	3.3009	2.2076	2.60253	1.46953	2.50074	4.88612	1.99181	2.28029
MIS18A	2.57729	2.75188	3.78213	2.99595	3.31347	3.21329	3.41722	2.43221	3.24378	3.51066	3.10391	3.14741	3.60436	3.66302	3.03729	3.66969	2.75488	2.98252	1.93217	3.15815	3.44651	2.16273	3.5833	2.8461	2.66741	3.06141	3.01191	4.75578	2.74082	2.50703	3.21298	2.3283	2.30521	3.17169	2.49784	2.98733	2.94509	2.50449	3.05318	3.64425	3.08751	3.02159	2.8655	3.5298	3.86207	3.42883	2.37769	3.44971	3.348
RAI14	12.8246	13.4599	9.01207	14.1094	12.4564	9.53321	13.1798	18.1672	12.9279	13.2221	15.6707	13.3232	6.73598	11.1245	13.7098	7.43076	9.94119	14.6688	14.0134	16.5507	10.9613	5.56352	12.3212	12.3634	13.2365	12.6639	9.55932	6.56952	11.1551	15.1651	15.6647	7.75237	14.3205	6.57743	10.6357	13.0953	15.6257	9.85558	15.6194	12.8747	15.685	12.3795	5.68161	12.1854	15.0251	11.5103	13.6942	9.95324	17.2892
FXYD6	16.0223	10.6059	13.0307	8.46288	14.8715	5.73604	12.7586	9.29723	13.1422	6.66324	12.8561	16.8476	5.71001	18.8806	4.22148	16.761	12.0266	13.1367	13.093	10.742	13.1184	8.95349	14.1054	11.1773	14.0325	11.4014	12.1364	6.44314	7.13891	6.66323	12.2821	15.027	15.7311	15.7326	8.1923	8.00121	9.24881	7.32539	16.128	12.3557	12.9416	13.034	10.9106	5.87046	6.5723	10.5425	13.3601	6.80769	7.59275
RAD52	1.49789	1.89142	2.31611	1.11014	1.60957	1.82054	1.38028	0.670441	1.79753	2.57496	1.48336	2.92445	1.60408	1.81777	1.53324	0.671395	0.630196	1.87901	0.897729	1.1148	2.59256	0.685973	1.73355	2.17589	1.46251	2.67921	1.46574	0.703741	1.02162	0.944468	1.54256	0.694913	1.01694	0.731654	0.688492	2.2013	2.07507	0.993627	2.01253	3.03685	1.22402	0.861299	0.767292	1.44164	1.42854	1.54192	1.0943	1.30825	1.83122
CYSTM1	45.0457	36.7508	61.0373	54.8044	52.7003	62.0305	40.3564	47.1476	48.3671	58.0291	33.4992	33.6669	38.6226	47.626	39.3619	80.9887	37.3765	41.4596	49.5773	44.4964	41.4792	50.9252	46.5749	36.0829	41.6592	39.7398	49.6516	83.8257	51.3403	53.1733	34.3389	71.2782	41.1593	61.8352	38.0522	39.7779	44.1817	49.4986	36.3738	40.2699	48.4895	55.3843	43.7208	40.4832	71.3313	55.5946	37.1512	27.3239	38.9478
RWDD2B	5.46454	4.64872	4.25754	5.98166	4.1598	4.97388	4.51528	2.42805	4.83557	5.05386	5.18561	4.09701	4.39495	5.26828	5.3579	7.16554	5.24067	3.88119	1.64282	3.53183	3.88224	3.23752	4.44225	4.67913	4.4147	4.44199	4.42293	8.33793	3.0667	3.00438	4.23796	5.11725	3.27652	7.55758	2.41135	4.76199	4.19235	4.25178	4.23081	4.98507	3.68748	3.65075	3.91047	5.11833	4.68835	4.11128	3.51622	4.90215	4.21487
2020-03-01	2.01882	3.26313	1.71893	2.24255	2.14932	2.31236	2.52133	1.74845	1.99856	1.1214	2.46679	2.29386	1.16157	2.67605	2.15192	1.98812	2.50921	2.81096	1.14417	1.446	2.3506	1.54761	2.17615	2.50668	2.22014	2.06354	1.64349	2.40049	1.90912	1.66163	1.89103	0.877119	0.886555	1.04859	1.4502	2.43284	4.22444	1.65436	2.13642	2.85215	1.74793	1.74455	1.38285	2.50706	2.56445	1.67185	2.60817	2.48962	2.70713
ADIPOR2	14.5017	19.1752	17.1415	15.3588	31.9325	13.9977	24.2833	23.8602	21.3817	12.4725	35.9853	21.7337	17.3436	15.5855	17.3457	19.1755	16.2147	17.9727	36.3287	23.3237	20.772	23.5251	17.583	23.383	24.0301	18.6552	14.8756	10.5874	23.9566	25.0902	20.9923	28.3672	28.7758	15.5518	21.8913	17.7543	33.926	28.6829	19.8604	17.2402	21.4118	20.784	21.1527	17.5333	18.5513	21.5182	19.1319	14.9152	16.8122
APCDD1	5.97436	4.93514	6.86779	5.13995	4.7021	2.90866	4.14463	2.9252	4.86027	8.77376	7.91415	10.3858	2.04472	4.74114	2.1984	5.83804	5.37401	6.04178	2.24798	3.68677	3.35103	4.59329	7.1724	2.74273	4.42092	3.93715	7.25183	4.32964	2.50933	3.35753	4.77103	6.53791	7.54409	5.04625	2.21451	5.29536	6.46629	3.9271	3.87484	5.1078	7.06994	3.06608	5.33961	3.12579	4.58006	4.79605	5.74755	4.86736	4.87683
SLC7A7	22.2865	28.6269	12.3287	14.9249	9.9034	18.4904	15.5898	11.946	14.5018	8.07085	15.2401	19.0808	38.0605	18.0504	18.8511	21.2048	19.9661	14.8882	11.6873	15.7482	13.7258	38.7164	13.9178	18.9126	21.7212	19.7829	21.7153	22.7996	16.4914	14.328	17.5147	25.7316	19.2985	18.7251	32.059	16.0504	18.5431	23.2404	16.2484	13.0641	18.5443	13.9285	22.3245	13.4578	19.0689	18.2273	22.9853	21.6367	18.0101
ARHGEF12	9.05133	10.2877	12.4109	8.75499	12.258	8.56177	14.516	14.5879	14.0571	10.7392	14.8285	12.071	5.3055	11.3635	8.40466	5.84494	9.25628	12.2863	12.4636	15.8925	11.7646	4.37728	11.8812	12.218	11.331	12.9507	10.8886	4.72245	8.76682	12.3994	13.1341	6.84054	11.4346	5.73847	6.80375	10.3518	12.1171	9.1177	11.1586	9.89651	13.5701	12.0582	4.83964	8.45637	10.2904	11.783	11.8934	5.80757	10.9584
ZBTB5	4.87116	4.73578	5.14103	3.70855	5.95287	5.07543	4.02834	3.82188	4.41526	4.64468	4.64832	4.94758	3.47458	4.58223	4.26669	3.4742	3.61429	4.78425	4.93839	4.17335	5.10234	2.91864	4.50703	5.1872	3.48755	5.45157	3.82596	3.9444	3.78407	4.67386	6.31627	3.0625	3.82483	2.96708	3.45434	4.65873	4.82811	3.88811	6.76592	4.66428	4.26155	3.73994	3.13912	5.20406	4.49514	3.70354	4.98991	3.59688	4.75693
LDB3	0.218767	0.324676	1.39803	0.36112	1.36527	0.373191	0.82976	0.703605	1.19018	0.601137	0.775102	0.688294	0.628217	0.451861	0.178403	0.806645	1.25249	0.394746	0.236383	0.396722	0.602043	0.562503	1.90974	0.377619	0.397759	0.739467	0.604854	0.581162	1.86979	0.455012	0.572466	0.571831	0.719211	0.725405	0.305982	0.626112	0.621052	0.646381	0.730051	0.747449	0.935226	1.20077	0.874993	0.2293	0.5109	0.714164	0.784339	0.370971	0.687909
ANKMY2	6.00941	7.64221	8.02977	7.50312	6.10644	6.95673	6.28673	5.81696	6.39939	8.46756	7.35368	6.42565	8.66632	6.96409	7.49902	7.11571	6.25612	7.15619	4.24931	6.20918	6.61005	7.42411	9.61759	7.78044	4.79527	7.72459	7.5208	8.05875	5.77684	6.81576	6.45917	4.86301	6.34628	6.65507	5.6604	6.37881	8.09853	4.85543	6.48751	6.9208	6.42903	5.39998	7.32207	5.32023	6.39722	7.22696	6.76845	6.42147	7.5551
TMEM56	2.28239	4.15912	2.63597	3.42177	3.19793	3.60274	3.60538	1.9971	3.65058	2.17264	5.24504	2.32654	2.00126	2.30651	2.84752	3.74985	3.00248	4.73518	2.00348	3.44149	2.30895	1.84591	2.91807	3.33117	2.56296	3.44433	1.98299	5.12838	2.30946	2.37194	3.81164	2.02801	1.79318	2.92014	1.69796	3.53289	4.293	3.08735	1.91263	2.85385	3.5031	1.77836	2.47028	2.94564	3.84444	2.04904	3.8486	2.8016	4.28632
KLC2	4.73325	3.33795	5.11737	3.05939	4.79562	3.91005	3.93605	4.51355	4.13555	4.95743	3.31873	5.09244	3.17471	4.23283	3.91281	1.77504	4.48085	4.44913	4.60052	3.54196	4.83761	3.3347	4.80744	3.42252	4.1056	4.77046	4.01285	1.66552	5.24206	5.88498	4.17494	2.81656	4.65927	3.64907	6.15597	4.60892	4.61946	4.83096	3.54877	4.27291	4.74423	4.77804	3.15393	3.79071	5.64538	5.03196	4.31795	4.16459	3.63389
VPS72	8.01611	6.31901	7.25631	7.02049	6.47898	6.76074	6.66128	4.87367	6.48838	7.40305	6.22689	6.68543	6.06305	8.26595	5.19335	8.45314	6.95092	6.58107	4.68978	6.13458	7.18611	7.13746	6.77108	6.45851	6.64589	6.56171	7.02315	7.6487	5.82713	6.62834	5.78103	7.82286	5.96244	9.64348	5.66097	6.92416	6.25635	6.58596	6.45111	7.01743	6.06961	6.33918	7.38623	6.53596	7.24694	6.76537	5.61121	6.59701	6.03187
TNS1	83.3468	55.8303	90.5824	60.9432	83.3604	73.3496	97.3339	67.6541	99.2127	53.0621	104.055	76.4999	40.1913	80.9726	48.9751	30.9717	71.9341	106.393	51.3017	78.0266	89.2476	26.1657	91.092	60.5315	80.2568	74.913	79.8083	20.6473	49.9985	80.798	99.8711	40.8036	80.6141	27.6534	43.3646	56.4967	80.894	73.3507	65.5078	87.4191	89.9496	112.943	47.232	45.9336	91.8515	77.0911	99.0523	34.7132	72.3138
NFKBIB	9.01891	7.56342	9.94914	6.41946	11.2342	10.4359	6.47619	13.5935	9.48949	6.99498	6.39366	9.28044	9.83295	11.0379	10.6224	5.15317	8.92726	8.6181	13.9994	11.5414	10.626	11.6777	8.12618	7.96482	9.60236	9.16614	9.4738	5.51591	11.6693	10.1569	8.18615	8.32467	8.82119	9.35809	13.2584	10.1524	7.17616	9.74175	11.0074	8.78541	7.33321	13.4539	8.96103	10.6815	10.59	10.9861	8.55718	12.5038	8.10928
AC141586.5	0.0481373	0.0660835	0.156131	0.0691775	0.0162861	0.0525142	0.101969	0.0561605	0.0932087	0.0425577	0.0846096	0.0605807	0.157372	0.0626181	0.0176056	0	0	0.0803453	0.0949071	0.0469804	0.194294	0.0281821	0.0652694	0.168459	0.087186	0.148447	0.0898749	0	0.0943005	0.0815662	0.0548319	0	0.0735761	0	0.0456393	0.117958	0.120747	0.0444717	0.0251585	0.121707	0.062156	0.0865776	0.0280048	0.10091	0.0978701	0.219091	0.105876	0.048324	0.314179
BCL2L2	19.3311	17.1643	22.8916	14.6384	23.4638	20.262	18.9376	14.5334	21.796	14.2872	19.5988	20.733	13.9524	25.654	15.8961	11.1734	17.4396	21.5783	18.4233	24.7499	23.8313	10.3196	23.2989	19.9752	24.058	19.5661	18.1282	9.15823	16.6332	19.619	20.5008	10.1636	16.0079	9.61453	12.4554	18.4475	24.2715	16.1485	20.6472	20.181	18.6308	20.2807	11.1969	15.6149	25.608	23.1344	19.2876	17.2478	20.2485
PEPD	23.6294	20.816	16.8127	23.2661	15.1874	20.1812	20.1394	16.9273	18.6772	14.9358	17.6982	15.8138	27.3695	21.2401	18.1803	20.7336	21.6043	18.7094	14.5297	13.0436	17.2641	33.9177	16.1994	17.1466	18.6292	17.4717	21.8282	22.2281	16.7214	15.6002	17.5219	27.9471	24.7061	33.4957	33.2649	19.3873	16.0847	18.9995	15.9178	15.5049	18.8509	18.4515	30.0929	19.5072	16.4983	19.24	18.5745	23.5209	16.8274
PLA2G5	3.17961	0.766475	2.94164	2.8069	2.1643	1.13264	1.61702	1.66047	1.90565	1.65094	2.30645	1.96901	0.701244	3.47138	0.71989	2.63088	1.44694	1.95855	1.277	1.66242	2.12506	1.68423	2.4709	2.62284	1.11652	2.08818	1.52535	1.19059	0.932205	1.06899	1.59532	1.99796	1.43676	5.20644	1.17235	1.19257	1.68534	1.52703	1.58266	2.64779	1.80841	0.987158	2.94537	0.634801	1.47506	1.86859	1.68592	1.32998	1.0634
DDX19B	3.8364	4.58361	4.43369	4.91739	4.85072	4.64232	4.6843	4.28233	4.9509	4.86186	4.0019	4.36672	3.99521	4.31486	4.86859	4.1118	3.23941	4.06488	4.16387	4.16377	4.26794	4.47163	3.91	3.59698	4.20092	3.91069	4.17964	4.23504	4.49487	4.22156	4.31277	4.22108	3.9609	3.36021	3.70697	5.04192	5.07022	4.84531	4.10021	4.44154	3.96602	4.86688	3.65318	4.57465	4.85094	4.76748	3.70184	4.20618	4.31005
ADORA2B	0.905193	2.36318	3.6988	1.91235	1.51817	2.41147	2.00761	3.21332	1.86634	2.88417	1.88113	1.07103	3.70965	1.88701	2.0656	4.00145	2.34128	1.23967	4.0083	1.0571	1.7175	6.67531	3.29692	1.24545	2.25203	1.55081	1.47457	2.55512	2.51158	3.48492	2.5777	4.60361	2.95138	3.1698	5.27523	1.57083	2.46221	2.78755	1.20294	1.59747	1.91055	1.98287	2.97064	1.13529	3.90623	3.31811	1.64848	2.8219	2.9419
C1QTNF2	2.34644	1.38894	1.47439	3.25455	2.84906	1.75198	3.85341	1.00154	1.5501	2.51779	1.95197	1.68057	0.801856	2.78288	0.583084	3.7957	2.5002	3.34328	2.29252	1.0373	2.17496	1.20262	3.46027	1.53071	1.69233	2.12906	3.31369	3.21444	1.26986	1.14291	1.76943	2.58656	2.61903	4.91411	1.09813	1.58843	1.05103	1.80018	1.44213	2.51497	1.96619	0.968051	2.56252	1.02833	1.3575	1.3167	2.09044	1.06697	1.68203
CAPN9	6.14238	11.2065	3.35252	6.83638	6.64384	2.13517	2.47222	5.20367	6.61981	1.82808	5.58544	5.20454	3.19337	3.7624	2.65849	3.32703	4.1218	3.29035	3.01798	4.41992	2.09464	2.03867	4.60726	7.72454	9.47273	7.43283	4.86129	6.32026	3.96196	3.96586	6.04726	5.889	2.27342	2.04756	5.24391	10.2049	4.6776	9.11788	2.14812	4.08935	8.9066	3.15999	4.83766	2.39336	14.2241	5.27628	5.53498	3.9478	10.7454
RNF217	1.34057	1.57161	1.85044	1.74229	1.72432	1.81845	2.11561	1.95861	1.75318	1.84104	2.59019	2.31296	1.59678	1.41302	1.90638	1.01264	1.11186	2.14214	1.99785	2.11024	1.64627	1.0613	1.90413	2.03491	1.2268	2.35227	1.39611	1.25087	1.94498	1.19508	1.92415	1.08608	1.42522	1.50022	1.14824	1.63276	1.69973	1.49579	1.61638	1.92963	1.56545	1.22221	1.04226	1.95227	1.51246	1.40856	1.78551	1.16282	2.00506
DUOX2	0.708452	0.847211	0.977719	0.363404	1.00492	0.883591	0.743979	0.737556	0.80474	0.842802	0.646718	0.875589	0.658852	0.437289	2.09194	0.125323	0.642505	1.03508	0.589134	0.734516	1.16721	0.574268	0.567569	0.677758	0.841235	1.01776	0.747853	0.353501	0.79755	0.991861	0.522935	0.250026	0.555992	0.112948	0.485213	0.80443	1.00369	0.874527	0.85486	1.10787	0.796859	0.806144	0.430545	0.555344	1.23772	0.836146	0.753174	0.789102	1.37822
MEST	10.7013	3.84678	5.10895	9.93402	4.56353	3.30099	4.48377	4.37545	3.32836	10.9078	6.27979	10.3336	3.30323	5.14189	2.88357	8.5565	5.66111	5.61949	3.75311	3.69142	4.33168	3.228	4.32566	11.8792	6.11448	4.91386	6.57113	12.0978	3.45878	3.21351	6.51713	5.93109	6.32398	37.0085	3.37728	4.06541	3.84178	3.10387	6.14755	4.0766	6.7273	3.83891	4.48456	3.60038	3.80529	3.84209	6.32135	8.13591	4.45048
TSC1	3.83734	4.90025	5.96412	3.47989	5.17086	5.25725	4.40459	2.41619	4.45514	4.63901	5.04021	6.44907	4.92063	4.53535	4.9343	1.50841	2.90211	5.20497	2.73957	3.51286	6.7662	2.58672	6.13303	5.32419	4.21472	6.17168	4.44451	1.37483	3.24622	4.16157	4.52809	1.50156	3.34681	1.24847	2.89653	5.56286	4.78278	3.16431	4.66	6.78856	2.9409	3.2831	2.24171	4.55434	4.58853	4.36786	4.75768	3.99815	6.17358
UGDH-AS1	0.871031	1.11799	1.46541	0.773438	0.814599	1.11467	0.825047	0.677473	0.839865	1.55475	1.01651	0.891213	0.87782	1.17451	0.621596	0.990155	0.710582	0.8392	0.504181	0.794806	0.844496	0.590794	1.41285	0.830205	0.824533	1.26176	0.920006	0.812997	0.574726	1.11994	1.0083	0.45272	0.825322	0.773171	0.380464	0.793279	1.17682	0.414346	0.767978	1.26823	0.720079	0.551918	0.921813	0.608647	0.935858	0.991718	0.846925	0.699054	0.974626
PIDD1	1.43928	1.56384	2.35376	0.865043	1.78054	1.79236	1.03883	0.741502	1.61701	2.9978	0.871829	2.68737	2.27663	1.61124	1.31599	0.433673	0.948024	1.27411	0.990827	0.918955	2.77015	1.54056	1.64147	1.42985	1.67929	1.91274	1.5801	0.475972	1.27519	1.08739	1.21139	0.628409	1.37921	0.688887	0.948517	3.28438	1.60269	1.04593	1.47193	2.9191	1.00412	1.01811	1.12003	1.8399	1.69217	1.93672	0.887565	2.54876	2.40475
PPBPP2	0.0144907	0.0497324	0.0188	0.0208244	0.0245129	0	0.0255797	0	0	0.0213518	0	0	0.0592168	0	0	0	0	0	0.015872	0	0	0.021209	0	0	0	0	0	0	0.0202765	0	0	0	0	0	0	0.0253633	0	0	0	0	0.0233884	0	0	0	0	0	0	0	0
ARHGAP12	6.7239	8.44699	9.37893	8.1248	8.80488	8.04959	8.15542	8.10052	8.61052	8.1004	10.1797	6.96454	5.02103	7.67796	7.65225	6.80399	6.83434	8.743	5.34436	9.30172	9.53713	4.84526	8.87487	8.49684	6.9745	10.2498	7.66647	7.5532	7.73896	8.30234	7.83695	6.21107	5.90361	5.73512	7.57087	6.9811	9.13443	6.04403	7.34364	8.00429	7.17782	8.6331	5.62448	7.34377	8.17108	9.00089	6.9449	5.38864	9.48836
HHEX	8.01176	4.29216	6.96674	4.63914	3.05437	5.29287	4.96721	1.2858	8.09086	3.58187	4.362	8.36134	8.16648	10.9387	3.5877	4.4883	6.80983	5.04887	7.29437	3.73796	9.57936	5.51421	4.31498	5.34765	3.62013	6.97683	7.21165	6.83466	2.13276	1.24718	4.84122	3.24161	3.48952	6.31689	6.36705	4.21378	1.71556	4.1642	6.94473	7.065	7.31717	4.04172	4.77468	2.65444	3.31079	4.74792	5.03935	8.09515	6.05529
ANKRD13C	4.51852	5.40263	5.74523	5.3022	6.08878	5.61281	6.11871	5.51717	5.81135	5.4175	6.34787	5.75682	4.61628	5.13096	5.85945	4.86277	4.37145	6.30872	4.98219	6.87478	5.88649	4.06426	4.84625	6.14022	4.56205	6.402	5.04882	4.66087	5.22281	5.59795	5.60192	4.06249	5.066	4.78619	5.14124	5.6234	5.93913	4.34507	6.24622	5.26689	5.51829	5.38182	4.07616	5.32133	4.62833	5.57896	5.43797	4.44118	5.38119
SLC4A3	0.69393	0.219532	0.658874	0.456835	0.419709	0.431982	0.403758	0.321122	0.281494	1.64513	0.306629	0.617985	0.459428	0.432849	0.368641	0.205241	0.568061	0.478821	0.13588	0.113506	0.561882	0.269518	0.705863	0.359518	0.767345	0.524694	0.844434	0.146323	0.640101	0.279177	0.237352	0.139805	0.533286	0.397081	0.471692	0.366415	0.425436	0.411872	0.349505	0.882139	0.400455	0.232416	0.194524	0.292562	0.407231	0.461467	0.394359	0.376201	0.34103
CAMK2N1	38.9292	19.8803	33.2774	43.2763	28.6754	32.6697	44.8317	27.9215	30.184	19.6284	44.8382	31.3128	13.1184	36.9311	15.6787	43.5022	33.7428	46.8866	22.6263	33.4598	37.6771	14.4986	40.1517	29.8723	31.743	39.166	39.027	20.641	21.8187	24.6287	39.0088	25.795	28.0032	31.33	11.8128	16.2222	19.748	28.6342	33.1834	41.4559	23.474	25.2369	42.8818	15.1253	29.283	39.4506	37.9001	14.0167	21.1066
MARS	9.27561	9.27654	8.81512	8.46686	8.09486	7.7049	8.46697	9.54057	8.82933	9.72405	8.25128	9.61292	9.96882	9.95143	9.00231	7.40703	10.0459	8.67599	9.31395	8.20853	9.887	9.77618	7.60179	9.5573	10.3433	10.4258	8.60965	6.97354	9.89842	9.23133	8.62073	7.508	10.2228	10.2033	11.4421	9.52587	8.91964	7.7486	9.7455	8.56748	8.66628	8.2075	8.58534	8.14747	8.02192	9.75316	8.23807	11.5443	8.51882
SLMAP	3.69838	3.33483	4.60183	3.20577	4.01904	3.66895	4.16439	4.36525	4.34913	4.23873	4.98799	4.01473	3.00828	3.31194	3.77063	3.77059	3.81519	4.67101	3.12492	4.83012	3.68825	2.52276	4.42499	3.97409	3.29383	4.45516	3.6379	3.02993	3.34007	4.6234	4.02838	2.5041	3.63742	2.82336	3.16674	3.5651	4.62579	3.29732	4.13415	3.32735	4.66554	4.2969	2.76458	3.29593	3.86461	4.17118	4.28432	2.55824	4.05188
BCL2L2-PABPN1	0.101996	0.0218784	0.0578937	0.0549666	0.0647026	0.0894138	0.112531	0.252867	0.133722	0.112717	0.0746984	0.240679	0.295243	0.110566	0.116574	0.0346148	0.0812268	0.0425602	0.223439	0.0622156	0.350866	0.121294	0.0370438	0.0892353	0.131954	0.0436859	0.0495918	0.0601525	0.0892008	0.12602	0.16338	0	0.146154	0.0717529	0.0805861	0.200842	0.0999398	0.0981558	0.0832927	0	0.0411562	0.0764359	0.0556297	0.106907	0.108007	0.0223185	0.0701055	0.149322	0.144718
C12orf54	0.159421	0.255331	0.220619	0.213828	0.107873	0.149071	0.16885	0.0991957	0.12862	0.172263	0.10897	0.2898	0.231638	0.126731	0.213789	0.158702	0.0338554	0.141913	0.174618	0.259315	0.233986	0.147778	0.133813	0.0929834	0.329991	0.309542	0.115752	0.117001	0.118973	0.120058	0.0605306	0.174217	0.128603	0.0598134	0.083971	0.167422	0.299916	0.21274	0.152753	0.470245	0.102924	0.0955757	0.123662	0.111398	0.126049	0.167443	0.0876602	0.284514	0.738903
C8orf17	0.0142244	0	0.00922723	0	0	0	0.0125548	0	0.00573808	0	0	0	0.00968809	0	0	0	0	0.0237417	0	0	0.0260969	0.00520481	0.00688815	0	0	0.0121848	0	0	0	0	0	0	0.00452946	0	0.00561925	0.0248972	0	0	0.00929276	0	0	0	0	0	0.0120501	0	0	0	0.0201823
SLC6A12	1.69702	1.39192	0.533449	1.026	0.316161	1.71559	1.18111	0.453539	0.72378	1.33288	0.881484	1.10548	5.95226	1.04541	1.46963	0.446531	1.39313	0.64261	0.540443	0.601936	0.747504	2.52485	0.919529	1.25578	2.03587	1.04384	1.29401	0.822995	1.53251	0.622818	1.29862	1.09066	1.18789	0.635307	2.91786	0.745854	0.668052	1.24319	0.776553	0.976572	0.862738	1.21012	1.61193	1.7944	0.82964	1.132	0.832423	2.28898	0.896306
WSB2	20.1895	19.6193	15.3434	22.544	17.3732	19.8337	18.7783	15.8477	16.5613	13.1041	17.6543	16.869	21.6485	18.7434	19.0387	25.4569	19.6604	17.5983	21.6037	13.0506	17.3909	22.8947	15.806	20.0202	18.1486	17.5291	16.2018	23.4875	20.2517	17.8464	18.7687	15.8887	18.165	25.6364	24.792	16.0002	15.4841	19.5066	17.2512	15.0802	17.8459	18.379	19.2403	16.1961	18.4146	16.4362	18.6789	18.4708	16.8648
LUM	401.93	106.952	97.3488	323.956	112.835	128.438	188.154	157.874	114.437	173.298	284.431	143.637	46.6992	124.498	94.08	217.711	193.04	234.785	124.654	205.17	124.205	79.0351	196.109	166.918	97.9134	171.818	231.427	227.342	114.102	69.8101	134.957	196.016	204.848	277.278	116.183	141.406	63.2097	137.761	190.096	119.994	131.444	63.8522	133.891	118.962	70.9021	117.154	222.134	102.972	114.907
SNORD64	0	0	0	0	0	0	0	0	0	0	0	0	0	0	0	0	0	0	0	0	0	0	0	0	0	0	0	0	0	0	0	0	0	0	0	0	0	0	0	0	0	0	0	0	0	0	0	0	0
RDM1	0.0499653	0.0171483	0.0324121	0	0.0338092	0.00778692	0.0529207	0.0116586	0.0483742	0.0588985	0	0.0419208	0.0544495	0.0541633	0.0182741	0.0678275	0.0318327	0.0333585	0.0656741	0	0.0550016	0.0511916	0.0387132	0.0699424	0.0258562	0.0856022	0.031096	0.0314316	0.0279661	0.0423318	0.0284571	0.0327616	0.0127284	0.123727	0.0078954	0.0524731	0.0156665	0	0.0261138	0.0210547	0.0161291	0.0149776	0.00726707	0.0418969	0	0.0349863	0.0137371	0.0501591	0
EGLN1	6.59325	5.99038	6.86927	11.0523	6.55323	7.02383	8.53124	6.95687	7.20213	7.63354	8.49939	8.4902	5.56562	6.74965	6.74137	8.79909	6.7283	8.38842	4.57647	7.08569	6.38461	6.18688	7.27224	6.85452	4.97657	7.64222	8.14493	8.04058	6.0593	6.26801	6.74587	6.13197	6.83221	6.48859	5.98624	5.69645	6.92082	6.60486	7.20912	6.32475	8.58965	7.29643	6.70111	5.72903	6.52669	7.59935	8.00667	5.50432	6.57577
DDX51	2.93021	3.05954	3.77546	1.86709	4.74178	2.86562	3.2349	2.59741	4.38043	3.49979	2.81589	3.80474	2.36955	4.82343	2.85783	1.56584	3.12125	3.06385	2.77142	3.36668	4.01062	2.35087	3.56766	2.69653	2.86018	3.63893	3.69066	1.60436	3.71403	2.91163	2.69755	1.67733	3.31362	1.9091	2.45967	4.08134	3.37852	3.05561	3.20469	4.44903	2.72256	3.22065	2.21206	2.35304	3.42007	3.37619	2.90276	3.13872	3.56361
PACSIN1	0.143701	0.133865	0.0452771	0.0413022	0.034727	0.0735846	0.0507336	0.0239503	0.0397499	0.0544477	0.0420965	0.103341	0.00559277	0.244788	0.150162	0.0334411	0.20926	0.0959397	0.130417	0.0601059	0.120522	0.0390604	0.202797	0.186787	0.058428	0.0633068	0.0894324	0.00645697	0.0459606	0.0405823	0.116918	0.0403812	0.164731	0.0785625	0.103805	0.186845	0.0193102	0	0.166301	0.0692042	0.0728946	0.00615367	0.0209002	0.13771	0.0069563	0.100621	0.0733723	0.151128	0.0349527
CNNM1	0.18773	0.116185	0.0778588	0.21229	0.0989154	0.107916	0.162979	0.0718098	0.0968351	0.467075	0.148756	0.103282	0.0712671	0.086739	0.0393949	0.0793771	0.191167	0.184921	0.0303383	0.0901074	0.0734012	0.0720704	0.113263	0.0646201	0.043796	0.100178	0.253779	0.0435597	0.180866	0.0651843	0.0876387	0.0454029	0.0764386	0.0484962	0.0680829	0.0915736	0.154393	0.123205	0.0402112	0.0583576	0.104312	0.0322883	0.0984732	0.058063	0.0469282	0.0538734	0.14384	0.0617896	0.0785986
BGLAP	0.116096	0.313064	0.451863	0.119171	0.589175	0.38771	0.117108	0.174145	0.33452	0.391007	0.218634	1.11319	0.451839	0.287657	0.424605	0.0225142	0.132079	0.13841	0.399655	0.485595	0.791129	0.351981	2.03996	0.377263	0.193107	0.710354	0.399968	0.0260829	0.440937	0.398121	0.165302	0.108746	0.126749	0.0746713	0.117933	1.04505	0.468021	0.127685	0.628433	0.803706	0.107075	0.0994309	0.144731	0.556278	0.561999	0.493557	0.250789	0.499483	0.470637
SLC27A6	1.15265	0.659322	1.13257	0.470954	0.56393	0.603191	0.997409	0.290047	1.4861	1.04069	0.835882	0.971812	0.13854	0.741121	0.392635	0.759345	0.512964	0.820474	1.03973	0.882311	1.18176	0.148858	1.1054	0.346032	0.548233	0.377527	0.501092	0.231035	0.411126	1.38026	0.901045	0.527932	1.02195	0.419745	0.446419	0.504376	1.17813	0.400199	0.110739	0.369045	1.60506	0.457302	0.26708	0.213203	1.08176	0.464873	0.535937	0.10399	0.753586
ABCC2	0.0633386	0.1576	0.219817	0.11833	0.11786	0.101179	0.0726754	0.0812849	0.155859	0.24732	0.102051	0.265705	0.0733369	0.120155	0.191113	0.0644862	0.0302645	0.111003	0.0555012	0.0618163	0.133635	0.111245	0.180963	0.23828	0.0696505	0.179048	0.101011	0.074708	0.075334	0.160986	0.117239	0.0103826	0.0786587	0.0142585	0.0425366	0.182923	0.183702	0.0633917	0.190344	0.146795	0.10223	0.0617055	0.225697	0.132776	0.139508	0.171858	0.0783624	0.143064	0.148282
DMTN	12.6501	11.6906	18.7591	11.1156	16.2716	16.9229	14.0978	10.4705	10.0779	11.9757	10.0303	10.3099	7.38075	16.7502	10.6184	8.75093	11.5254	13.7643	9.03276	8.82786	14.7574	10.9173	17.8882	10.747	10.9656	13.4934	11.5161	6.5991	13.0334	14.1866	12.879	10.256	11.8696	8.31375	9.9215	12.434	12.4305	14.6884	9.88143	13.4799	12.7405	11.0704	10.4828	11.9781	21.3806	13.4241	10.6752	10.542	12.6273
DNMT1	6.50355	5.55589	5.92305	5.27532	5.5383	4.72239	6.34124	5.58486	5.50061	6.94669	6.27979	7.5897	7.20413	6.08464	5.99435	2.19619	7.18803	7.0786	6.89622	4.81745	6.56101	3.51353	5.79136	6.39493	6.23208	7.38319	6.65178	1.95497	5.26902	6.16486	6.78437	2.79728	5.83041	2.94578	6.88141	6.88005	5.00318	4.25	5.5255	6.68997	6.76381	4.4057	2.9625	5.23288	5.00765	6.08381	6.24818	8.91942	6.2089
CHKA	6.63816	8.69189	9.12738	7.44733	11.2465	12.2454	7.11707	7.57232	7.47489	8.94861	8.69411	13.1441	8.13398	8.5258	9.9235	4.85805	4.52427	8.16529	8.57014	9.87442	10.0587	6.00906	6.80376	8.50658	7.45509	8.16323	6.36797	4.26712	9.80862	10.2791	7.52365	6.61728	5.36552	3.06548	6.65646	11.8773	10.0717	7.26609	8.34749	12.4417	5.3653	8.1715	4.97172	8.89998	12.8598	10.4707	6.85793	8.77277	13.0228
PLOD2	4.56625	2.2989	4.21289	5.89809	3.58056	6.30172	3.79562	4.39375	3.9256	5.5264	3.93963	4.28803	2.22924	3.1451	5.03184	5.43126	3.35891	3.94213	4.26643	6.35473	3.04034	1.81911	4.00742	3.61781	2.88524	3.98449	5.33341	4.18937	3.56494	3.66307	3.63487	2.8984	3.58534	5.83695	3.12031	3.06774	4.40285	3.11601	4.06406	3.08909	3.98291	3.56701	2.11739	4.1016	3.37188	4.2339	4.35385	3.13975	4.01036
BIRC7	0.416964	1.53945	0.61473	0.108948	0.106871	0.77782	0.156131	0.23586	0.468928	0.484065	0.33313	0.609556	21.3767	0.109575	0.462118	0.120066	0.402494	0.253072	0.498232	1.29482	1.80815	4.54013	0.0856609	1.21599	3.41639	0.389649	1.99538	0.0397422	1.94483	0.0356831	0.5757	1.40841	0.579377	0.14222	1.3477	1.2606	0.574456	0.0583656	0.264148	0.106487	0.122362	4.54505	6.45034	0.609208	2.89005	0.508724	0.503709	0.147983	2.43815
TMBIM1	77.0018	60.5342	52.5522	61.7605	54.3498	65.3027	69.9797	58.7208	64.2986	51.1059	61.1111	52.7002	73.9032	39.5114	50.1584	79.2141	70.1332	61.7089	68.1098	50.6391	63.0077	102.679	54.5768	55.6826	54.0461	66.611	70.4617	77.4628	68.0663	58.0548	65.0112	79.1858	74.3381	113.078	93.9245	58.0919	51.7895	68.0683	58.9701	53.8182	61.7541	63.136	84.1919	58.635	58.423	54.846	61.7921	59.6885	62.8171
FOXD3	0.0189226	0	0.00613748	0	0.0160051	0	0	0	0.0152667	0	0.0138582	0	0.012888	0.0205125	0.0173017	0.0642183	0.0452082	0.0157917	0	0	0	0.00692395	0.0458164	0.0165551	0	0	0.0147206	0.0148795	0	0	0	0	0	0	0	0.0165603	0.0148329	0	0.0123621	0	0	0	0.0412823	0	0	0	0	0.01583	0
SLC25A31	0	0	0.00695425	0	0	0	0	0	0.00864919	0.0315927	0.0157025	0	0	0	0	0	0	0	0.0117424	0	0	0	0.0103827	0	0.0277382	0	0	0	0	0	0	0	0	0	0	0	0	0.0165068	0.0140073	0.0225872	0	0	0	0	0.0181635	0	0	0.0179367	0
CYP17A1	0.314755	0.410094	0.44995	0.586354	0.463428	0.545039	0.298389	0.768434	0.423238	0.223304	0.734233	0.562391	0.309655	0.808771	0.95931	0.197813	0.724133	0.31132	0.17238	0.426653	0.363591	0.285796	0.485486	0.744532	0.648506	0.359499	0.399031	0.220002	0.619864	0.353911	0.174285	0.0859919	0.155909	0.229626	0.432894	0.153034	0.420349	0.170523	0.357947	0.491235	0.451576	0.567851	0.623099	0.32991	0.720922	0.173459	0.432683	1.17028	0.702968
OXNAD1	1.39563	1.95038	1.5502	1.63801	1.40777	1.38021	1.2804	1.25046	1.5884	1.45048	1.56517	1.37197	1.60998	1.19697	1.52182	1.69235	1.05212	1.54574	0.911526	1.52484	1.37233	1.61851	1.40184	2.35704	1.65891	2.31891	1.41823	1.46663	1.21431	1.56374	1.38317	1.465	1.43118	1.35949	1.29966	1.50195	1.68033	1.2016	1.84891	1.38497	1.37454	1.20846	1.35165	2.00926	1.32768	1.48512	1.22411	1.4303	1.49778
APEH	19.8842	16.1541	14.6098	16.8694	14.4229	18.1263	15.3491	12.1861	14.6715	19.7258	14.2901	15.5427	19.0707	18.4802	16.7586	17.5074	19.417	14.0261	9.99165	10.9119	15.5183	17.5121	15.3646	15.2663	18.5004	16.0193	17.399	17.1181	15.0475	14.8087	15.2394	18.3206	16.1605	20.9872	19.01	16.3143	16.8789	16.6427	12.8799	15.0782	15.5352	14.1473	18.0536	15.5515	17.74	16.9674	14.3702	20.3475	15.102
LRRC40	4.03075	4.77954	5.16284	6.59897	6.21657	5.68987	5.4482	5.42911	5.66476	3.95277	6.41515	6.04302	4.06436	4.86644	5.08083	7.9428	4.18549	5.44838	5.53935	7.68074	5.43643	5.09824	4.97086	6.72959	4.55062	6.03801	4.53582	6.62962	4.40486	5.5563	5.64171	6.02394	4.76795	8.66558	4.55799	4.45585	5.57889	4.52042	7.24265	5.3637	4.30771	4.84122	4.48888	4.77714	4.04653	6.06164	5.24931	4.3624	5.51514
WDR82	25.6717	19.7197	20.624	22.3346	23.7776	17.928	24.8793	26.0257	25.8564	23.3675	23.2791	22.8601	15.8978	23.6886	19.716	21.2052	22.2503	27.4705	27.2166	26.7265	22.2657	17.2836	23.8482	25.5839	19.6113	25.5043	25.5054	15.8337	21.6409	22.432	20.6515	17.0292	23.5185	19.8132	22.8182	20.5604	19.9773	21.5101	24.2157	22.3892	25.7354	21.563	17.1322	20.8166	20.6088	21.5946	21.9615	20.0689	20.5449
HRH3	0	0	0.0095865	0	0.0124996	0	0.0130436	0.00862067	0	0	0	0.0309973	0	0	0	0.0100306	0	0	0	0	0.0135565	0	0	0.0258585	0.00955936	0	0	0	0	0.0104337	0	0	0	0	0	0	0	0	0.0675821	0.0155684	0	0	0.0107469	0	0	0	0	0.0123629	0
EMX2OS	0.0111833	0.00767629	0.0101563	0.0128571	0.00756722	0	0.0157931	0.00260945	0	0.0131827	0.0229327	0.00469139	0.00304674	0.0121229	0.00409014	0.00910875	0.0106873	0.041065	0.0146993	0	0.0287246	0.00818413	0.00216621	0	0.0115744	0.00766384	0.0208798	0.00703506	0	0	0	0	0.0427332	0.0327279	0.0141373	0.0156595	0.0105195	0.0137756	0	0.00942499	0.0324903	0.0167615	0.0601815	0.00937741	0.00378954	0	0.018448	0.0261956	0.031735
USPL1	3.38502	3.91214	5.07365	3.04934	4.0129	4.12612	4.05837	2.77208	4.68219	4.08554	4.52943	4.49913	4.55855	3.92407	3.96477	2.95887	2.59452	3.96584	4.46274	4.28461	5.53209	3.52559	4.084	4.24516	3.22339	4.82947	4.11028	1.96225	3.65886	3.80642	4.30979	2.55029	3.24716	2.41869	2.95134	4.03079	4.2201	3.40357	4.16624	5.20904	3.18239	2.81089	2.9265	4.18172	3.65382	4.03802	3.5945	3.76927	5.20718
CLMP	3.99605	1.9203	2.71528	4.1345	2.92796	1.82245	4.19003	2.82797	2.58045	6.38449	6.6755	3.39491	2.04126	2.87947	1.83396	3.71627	3.89157	5.15742	3.12157	5.07341	2.91266	1.82773	3.63767	3.13699	3.46652	4.74322	3.41895	1.85733	2.71452	1.39424	3.4789	2.31041	4.5202	3.53465	2.66468	3.49718	2.6953	3.13609	3.15196	3.34492	2.38115	3.14552	3.48323	2.63808	1.05624	2.78588	4.01879	3.46605	2.45032
ABHD14A	6.73092	6.82198	5.9653	7.0251	5.13855	5.99516	5.58194	4.15394	5.61797	7.90008	4.86262	5.18766	6.34238	6.82861	5.26649	8.92311	5.92211	4.80686	3.05448	2.57177	4.73554	7.39174	5.60256	4.74879	5.64776	5.10463	6.99888	8.02724	5.37698	4.75803	4.02967	6.0405	4.86807	6.79146	4.64917	5.59283	4.90534	6.27461	3.34	5.26346	5.35827	5.22451	7.59872	4.90632	7.29807	5.14312	4.91732	6.55429	4.68678
HAO2	0	0	0.0204626	0.0302214	0.0533616	0.00819348	0	0	0	0.0464802	0.0308026	0	0	0	0.0384565	0	0	0	0	0	0	0	0	0	0	0.0360286	0.00817988	0	0.0294263	0	0.0299428	0	0.0535717	0.177528	0	0.0368085	0	0	0	0	0	0	0.237041	0	0	0	0	0.0351853	0
TLR6	0.827387	1.16727	0.867661	0.474671	0.503426	0.545343	0.571518	0.331938	0.633233	0.761361	0.670615	0.733962	1.47007	0.666474	1.0047	0.355153	0.958409	1.01527	0.548055	0.76601	0.797987	0.816103	0.72531	1.4878	0.647317	1.6024	0.770862	0.432021	0.585737	0.52643	0.51686	0.327005	0.858083	0.48957	0.961185	1.39668	0.364016	0.508582	1.39299	0.599458	0.401156	0.274485	0.60882	1.28884	0.343532	0.692697	0.795717	1.40074	0.793455
RALGPS1	1.32427	1.69226	2.44918	1.20124	2.27831	2.24533	1.50871	1.30831	1.78372	2.49931	1.549	2.1906	1.42265	1.59232	1.87894	0.739473	0.978317	2.10059	1.24065	1.57659	1.99191	0.863274	2.3468	1.65653	1.33898	2.4329	1.46128	0.691258	1.61121	1.86462	1.40948	0.695876	1.30633	0.630055	1.00473	2.14693	2.04371	1.28417	1.51922	2.28357	1.67354	1.14021	0.662506	1.67745	2.36781	2.0321	1.10258	1.3734	2.37733
ABHD14A-ACY1	0.0729623	0	0.0946601	0.0131066	0.0308563	0.0497478	0.0482987	0.053202	0.0882985	0.0537544	0.0400762	0.0573893	0.0621175	0.0692059	0.0667124	0.0247614	0.0726312	0.0608901	0.0599382	0.0667581	0.100396	0.0467206	0.123662	0.0957506	0.129789	0.0312503	0.0993303	0.0286864	0.0510473	0.0386347	0.0129858	0.0149501	0.0232334	0.0821246	0.043235	0.127707	0.0142982	0.028086	0.0476662	0.134511	0.0441612	0.0273389	0.053059	0.0382377	0.0463571	0.127723	0.0250747	0.0610377	0.116463
GPR21	0	0	0.0109425	0.0242417	0	0	0	0	0.0136095	0	0.0247079	0	0	0	0	0.022899	0.0268673	0	0	0	0	0	0.0163373	0	0	0	0.0131228	0.0265288	0	0	0	0	0	0.0189869	0.0133277	0	0	0	0	0	0.0272264	0	0.0122671	0	0	0	0.0231887	0	0
ARHGEF2	22.3937	19.1788	21.7612	13.2453	15.5914	23.1151	17.4598	14.3877	21.7189	15.3635	13.6045	22.0058	21.1426	25.2191	16.2579	7.91878	17.6496	19.2925	14.4118	16.0516	25.2138	11.1009	19.5875	21.4652	19.3028	26.6468	19.6647	8.52162	14.357	18.2648	19.4571	8.98845	14.4997	10.3766	15.0164	30.1468	19.1305	13.952	18.8515	28.8783	16.0199	14.7078	12.2691	19.8827	22.4976	17.9345	18.0664	19.6032	26.7492
ITPKC	10.0227	22.4618	14.6825	40.7301	67.6411	11.1448	13.7505	238.883	13.303	11.9074	23.844	35.6734	9.69746	9.58803	33.4045	18.0697	8.01424	16.2616	173.964	56.1499	10.7933	53.4852	11.3728	37.3702	28.8595	11.3076	11.1036	6.62036	126.253	58.8078	43.2769	43.6586	59.8051	22.6478	52.8426	42.1783	41.5812	44.789	72.0981	12.653	14.9723	136.211	14.9206	57.1035	20.34	22.4237	55.3918	11.0819	17.3395
WT1	0.441464	0.197624	0.00311276	0.124126	0	0	0.542117	0.0111966	0.00774284	8.44222	0.0562281	0	0	0.0572185	0.140399	0.67745	0.00764279	0.28032	0.178702	0.152204	0.00880364	0	0.00929473	0	0.00620789	0.123315	6.31989	0.264127	0.530442	0.0203271	0.00683232	0.00786581	0.314766	0.0486099	0.413246	0.117585	0	0.147771	0.100316	0	0.100684	0.007192	0.0244268	0.120709	0	0	0.237469	0.859054	0.122551
POLR2L	76.7158	84.1357	70.5498	95.1221	54.3482	85.4473	62.5707	56.1531	68.4473	83.449	50.5262	60.2103	84.1139	89.6808	69.6229	135.39	94.2493	56.4218	62.2219	62.07	61.2896	103.152	53.3268	53.7667	90.9084	73.6955	86.9322	126.492	83.019	69.0123	67.3743	118.275	61.1623	144.94	68.9551	70.4206	69.3878	71.369	57.2426	71.0772	69.9023	77.3968	92.4741	66.697	83.8316	71.9417	71.6045	116.934	62.1606
LRBA	4.62572	5.76903	7.33486	4.07897	5.5238	5.26409	5.6685	6.49023	5.79586	8.55739	7.21303	4.66404	4.02123	4.37091	6.71108	2.58246	4.84503	6.08346	4.57724	5.41577	4.09657	2.46414	8.11113	5.85244	4.87948	6.86268	5.73563	3.32238	4.95393	7.64614	6.04041	3.2701	6.36251	2.23501	5.1045	5.58585	6.44154	4.80191	3.84678	4.87722	7.38922	3.96285	3.16487	5.77267	6.5628	6.46361	5.04852	4.3884	5.84293
UBXN10	1.30371	3.87859	29.7054	1.45607	9.96023	8.12438	2.65783	6.64611	3.46988	26.612	2.10157	4.04977	4.792	3.51391	6.97728	2.00542	2.97364	2.01043	1.77334	1.78928	2.08638	7.03371	20.0239	2.07043	0.398739	7.98132	6.35532	4.46275	3.80217	16.2178	1.56875	1.73055	6.46625	1.72263	0.808921	2.39352	5.42071	1.11279	2.67086	6.44907	7.45626	1.24779	4.66307	2.577	11.3924	15.5349	1.08114	1.52334	1.96538
CDC42BPB	22.9529	19.781	20.2547	16.8509	21.1403	14.9328	24.7484	18.5699	22.8043	18.659	24.9996	23.6895	21.4792	22.5667	15.0615	7.77698	18.2928	21.0366	22.0062	15.1218	22.0132	14.5323	21.3316	17.753	20.1428	22.566	19.7371	4.50486	18.226	20.2062	23.3766	7.91524	24.9442	8.2712	23.9074	18.9176	20.8596	17.5315	20.8004	18.2886	23.8372	17.6265	13.8547	17.0317	19.7659	19.4799	25.7296	16.8302	17.8088
TMEM229B	1.72696	1.03563	1.5218	0.742761	1.05233	1.02254	1.22378	0.361076	1.52315	0.848218	1.04264	1.29183	1.0919	2.07671	1.18286	1.10495	1.55276	1.22943	0.637311	0.589004	1.6353	0.790455	1.83143	1.95496	1.03702	1.75507	1.75518	0.793367	0.66259	0.57686	1.49386	0.674741	1.35607	1.15306	0.498833	0.861318	0.824844	0.895897	1.02713	1.45414	1.39368	0.533445	1.05556	1.27811	0.938618	1.50072	0.953003	1.08742	0.930942
CLDN14	0.138355	0	0.00897496	0.139179	0.0585113	0.0107811	0	0.0242122	0.027906	0.0203863	0.0202652	0.304709	0.0188464	0.0224969	0.0253007	0.0187815	0.0440726	0.0461852	0.0303088	0.0337574	0.0253834	0.0303751	0.0267993	0.0484179	0.0268486	0.0237034	0.0161447	0.0435172	0.106478	0.0195363	0.0196995	0.034019	0.0264338	0.0155729	0.103847	0.0605412	0	0.053258	0.0180774	0.0437256	0.0223308	0.0414731	0.0352146	0.0725081	0	0.0242194	0.0475479	0.0694456	0.0294458
ZNF85	0.7399	0.645723	1.1053	0.680512	0.700918	0.889541	0.820982	0.251567	0.781149	0.953173	1.10233	1.03758	0.817822	0.806648	0.572143	1.03884	0.619537	0.557494	0.393639	0.526114	0.899805	0.40533	0.728878	0.769396	0.432114	0.789546	0.644668	1.09048	0.366801	0.411937	0.80066	0.699991	0.508909	0.789983	0.33739	0.629029	0.709239	0.598927	0.74578	0.953168	0.7643	0.51329	0.685647	0.540652	0.608892	0.606902	0.656766	0.580067	0.989821
CIB3	0	0.047634	0.0180067	0.0797828	0.0939144	0.0432607	0	0	0.0223954	0	0	0	0.0378122	0.0300907	0	0	0.0442121	0	0.0608093	0.0677284	0	0.0203141	0	0.0485711	0	0	0	0	0	0	0.0395237	0.0455022	0	0	0	0.0485862	0	0	0	0.0584853	0	0.0416043	0	0.0581901	0	0	0	0	0
EMC9	3.38052	2.55928	4.52289	2.76841	2.8593	3.75763	2.43525	2.29098	4.43201	3.90068	2.40296	4.43165	4.94349	4.09567	3.90914	4.42032	3.91945	2.98714	2.46398	2.66853	4.42357	4.08379	4.22496	3.39251	4.80754	3.89657	4.05111	3.42051	3.07817	3.72048	2.2474	4.40053	3.3956	4.08482	2.74947	4.02443	3.85793	2.79395	2.28969	5.78706	2.78831	2.99905	4.14848	3.41302	4.44308	5.43907	2.81901	5.63526	3.35048
ABI2	3.10709	3.10792	4.85694	2.75835	3.93667	3.47318	3.81829	2.91931	3.88541	3.97869	3.69113	4.24951	1.88863	3.35989	2.55089	2.88922	2.53839	3.60181	2.99744	4.44789	3.56646	1.35699	4.20209	3.79814	3.3904	4.10867	3.00084	2.71128	2.4526	3.65512	3.44838	2.36286	2.9749	2.16805	1.47573	2.53189	3.93481	2.37058	3.3258	3.44164	4.31723	3.62738	1.6345	2.50214	3.94714	3.94786	3.39324	1.90788	2.9202
NRTN	0.391523	0.397008	0.565677	0.255751	0.541892	0.610175	0.596889	0.352965	0.789697	0.36712	1.12088	1.04519	0.460599	0.945294	0.553249	0.434854	0.566903	0.623781	0.311888	0.173688	0.946864	0.234428	0.741144	0.373678	0.46047	0.213427	0.567627	0.27988	0.423338	0.527717	0.734841	0.437584	0.555359	0.320501	0.35152	0.560691	1.11601	1.04128	0.186023	1.23737	0.775548	0.800199	0.660032	0.298454	1.35685	0.404993	0.733927	0.565741	0.606015
TNP2	0	0	0	0	0	0	0	0	0.00891554	0	0	0.0231785	0	0	0	0	0	0	0	0	0	0	0	0	0	0	0	0	0	0	0	0	0.00703766	0	0	0	0	0	0	0	0	0	0	0	0	0	0	0	0
MIR191	0	0	0.113299	0	0	0.136099	0	0	0	0	0	0	0	0	0	0	0	0	0	0	0	0	0.169156	0	0	0	0	0	0	0	0	0	0	0	0	0	0	0	0	0	0	0	0	0	0	0	0	0	0
RND1	5.16494	14.2181	9.26642	12.2091	23.9814	4.13387	7.2512	185.96	2.21455	1.28561	2.22013	28.1055	1.66564	0.911286	18.4242	3.8904	2.6576	5.51684	15.6884	64.191	10.2704	27.6097	4.67534	8.44686	7.74478	1.92032	2.0957	0.751178	25.255	9.10064	98.5497	32.9054	5.39435	15.9496	16.0966	50.9868	12.6601	11.1495	192.761	1.77121	5.65351	87.0335	22.235	40.1049	4.17582	9.06367	60.4162	1.02293	9.65961
KLK7	11.5547	0.542664	1.03621	2.92484	2.27698	3.92377	3.19195	1.68389	0.196259	7.52716	4.69136	1.58172	2.20908	0.290065	0.845197	0.649433	0.555339	3.70829	25.6677	0.732017	0.401665	0.694278	5.66999	0.227011	0.220293	0.152811	1.67162	1.27521	3.86904	0.274792	0.658084	0.598128	0.96051	0.0182537	1.26208	0.851557	0.88985	1.94769	0.15892	2.56264	0.863774	0.340287	0.117933	1.81879	0.975417	0.411635	2.59716	0.271334	3.30191
TCL1B	0	0	0	0	0	0	0	0	0	0	0	0	0	0	0	0	0	0	0	0	0	0	0.0101565	0	0	0	0	0	0	0	0	0	0	0	0	0	0	0	0	0	0	0	0	0	0	0	0	0	0.0148793
THBS2	23.1116	1.36594	2.23553	4.38499	3.76297	1.20447	5.80567	2.86518	3.6043	16.3658	9.88765	3.20329	2.02989	2.85951	4.78435	5.45302	7.86729	4.4595	2.52776	3.42512	2.71698	1.98689	5.59962	2.69924	2.09549	4.33959	9.97014	3.70213	3.44074	1.89943	2.52152	1.27446	5.62345	9.25468	4.85573	4.35793	3.52123	1.89545	1.83821	1.88512	5.60711	2.86235	2.61158	3.39548	1.24409	1.44742	6.84102	4.6613	3.44072
SMDT1	15.4835	17.7654	25.5982	28.7069	19.8275	22.1226	16.826	15.3106	22.5279	30.0219	17.7859	18.9885	23.1414	24.2249	21.8925	54.8529	19.1224	12.2365	14.5242	13.8817	15.7932	28.7615	22.6372	20.7683	25.297	23.0498	18.5645	46.1546	19.5119	19.1586	19.9356	34.1837	17.9716	41.4264	17.5933	20.3956	23.3088	23.0332	13.7652	19.8667	13.9676	14.816	28.6718	21.559	23.7221	25.807	21.0965	31.6288	21.985
NPTX1	0.211997	0.545684	0.297961	0.148097	0.189272	0.470346	0.135137	0.130536	0.363456	0.221265	0.263077	0.475542	0.577556	0.290452	0.188453	0.147889	1.47255	0.147434	0.164479	0.402308	0.140451	0.450345	0.650177	0.422466	0.399966	0.141244	0.281739	0.0972419	0.230722	0.403288	0.545006	0.0917036	0.180016	0.387755	0.497835	0.128841	0.156946	0.539504	0.261606	0.502496	0.342168	0.123565	0.344733	0.0432063	0.194557	0.195862	1.05641	0.610869	0.50132
TMEM129	19.7936	11.3549	17.7982	12.9866	15.7524	15.3434	14.3832	8.60959	15.3264	15.546	11.4054	16.4649	13.2001	21.9912	11.5866	12.8277	17.2608	14.9395	10.1557	9.75129	17.1684	16.5415	16.0436	12.2003	15.1848	17.2896	18.2664	12.5345	14.2095	15.0516	14.1976	13.9484	14.008	18.7166	13.224	15.5763	13.7987	14.7442	10.6236	16.3095	16.6771	14.5755	19.3521	11.1426	18.303	16.9834	15.3232	16.4531	13.7655
TUBA3FP	0.196953	0.154905	0.920948	0.047173	0.3887	0.28776	0.188322	0.143612	0.38401	0.87062	0.180301	0.292618	0.23475	0.435896	0.195089	0.178241	0.104565	0.164365	0.0719092	0.200228	0.271006	0.192178	0.651725	0.157952	0.138016	0.379604	0.274514	0.0903413	0.11483	0.266518	0.140215	0.161424	0.182921	0.203211	0.0389025	0.215456	0.244443	0.0252715	0.139391	0.242064	0.278151	0.172195	0.173065	0.0688119	0.278078	0.359137	0.124091	0.247146	0.186298
CHPF	30.6107	11.3095	20.3531	13.5049	18.6045	19.3409	23.0913	14.8837	17.7747	27.4597	14.9023	16.5143	15.2698	22.8234	18.2286	13.364	29.7103	18.3172	14.979	11.1557	17.1007	12.1093	24.0956	13.6942	16.5272	22.5923	25.745	10.2722	18.3369	19.2271	18.2483	15.2404	23.1448	20.6516	19.4801	18.632	13.6533	18.4201	12.3786	24.4242	21.7875	20.329	18.1139	13.273	22.492	18.0574	22.8679	25.342	14.8113
PDCD6	5.71319	6.05432	6.80531	6.24441	6.2391	6.75238	5.49402	4.71286	5.70637	6.88965	5.0033	7.17347	7.10839	6.84228	5.67623	9.11313	5.52335	5.18084	4.10356	4.23061	6.41951	7.68496	6.24402	5.54407	6.0141	6.64646	6.58914	9.08306	5.74557	5.38698	5.12414	6.32182	5.64445	8.37293	5.28267	6.57563	5.56052	5.61171	5.8893	6.56183	5.31866	5.00126	6.9109	5.74421	6.36161	7.17329	4.94145	7.4579	6.64896
CTSS	93.9808	175.603	79.6994	93.5341	60.7007	115.304	92.8998	108.316	102.491	69.8208	100.27	95.1305	212.837	83.1441	140.558	100.647	119.918	89.2726	55.4862	111.424	63.4863	219.24	91.4048	146.631	112.145	135.116	104.741	204.321	94.3065	90.6121	112.605	170.591	141.912	141.285	167.843	98.8956	61.0997	132.028	140.635	76.8225	92.6264	122.409	178.493	250.216	69.5195	122.482	111.514	129.063	129.206
FAM217A	0.00628945	0.0647568	0.0856782	0.036154	0	0.0196038	0.0111024	0.0440264	0.0050743	0.111209	0.0368493	0.0395763	0.0685391	0	0.0345042	0.00853788	0	0.0314929	0.013778	0.0153457	0.069234	0	0.0487307	0.0880409	0	0	0.0195712	0	0.0176014	0.0444048	0.00895518	0	0.008011	0	0	0.0330256	0.00986022	0	0.0410889	0.0795087	0.0101513	0.0188532	0	0.0395537	0.0213123	0.0330296	0	0.0526154	0.0535429
GSTM2	1.47654	1.47494	2.77094	0.724937	1.73965	1.41375	0.963092	1.465	1.36769	2.45639	1.49996	3.46033	0.967321	1.87754	1.08084	1.11388	0.820697	1.35149	0.988875	1.31005	2.90358	0.665446	1.9773	1.77292	1.01393	2.45177	1.66236	0.70821	0.975486	1.32372	0.99261	0.983054	0.787302	0.857786	0.581588	1.78105	1.82607	1.00674	1.78498	3.0608	1.00289	1.06109	0.914741	0.826011	1.59198	1.26584	1.48511	1.5721	1.52671
SLC22A12	0	0	0	0	0	0.00455005	0	0	0	0	0	0	0.00795398	0	0	0	0	0	0	0	0	0	0	0	0	0	0	0.0183661	0	0	0	0	0	0.394344	0.00461344	0	0	0	0	0	0	0	0.288748	0	0	0	0	0	0
NOC4L	6.80897	6.3596	7.95047	5.87105	7.15779	7.5721	4.22401	7.28564	6.9139	8.88629	5.82725	6.26359	8.70531	7.07527	7.06175	5.50626	6.66188	6.18568	6.03037	5.26879	7.47744	7.01168	6.60392	4.7146	6.75764	7.01588	7.42332	5.06348	6.65574	6.51043	7.06342	6.72872	8.00368	8.15671	7.90814	8.70005	6.34382	7.71333	5.29983	6.51721	5.73043	7.59563	8.65109	6.42314	8.17433	7.61133	6.5253	9.04874	5.78276
RBMS2	20.2115	19.6552	20.9483	13.5452	24.5707	17.2603	21.9245	14.2496	24.4915	15.0938	27.4506	25.1578	13.1598	22.3519	14.6374	12.3142	15.7299	19.1065	20.8321	18.2228	26.5906	11.4973	17.8099	20.6812	21.5487	24.4735	15.9535	8.63302	15.7231	17.7592	18.2778	11.8606	19.5284	8.52005	11.359	16.1523	23.3615	17.3085	26.6162	20.6853	18.0674	18.8403	12.2986	14.1341	17.9328	18.8303	18.6911	13.1261	20.5864
PLD2	7.06194	6.41603	6.47735	4.61301	5.58036	5.90877	6.05129	5.04985	6.70089	8.93019	5.25175	8.83324	8.89365	7.27886	6.02508	2.87212	5.60141	6.26078	4.23244	4.75835	8.04488	4.8637	6.3937	5.8852	6.33102	7.60928	7.5763	2.81304	6.29396	5.00013	5.31787	4.16976	6.4492	3.66761	5.21907	8.77048	5.16534	4.96744	6.8478	7.4693	6.27584	4.15751	4.52185	6.14503	4.81608	5.71104	5.90573	7.84326	7.22989
CPD	8.81613	9.52633	11.4236	9.10497	9.84653	8.44676	11.8624	12.4022	12.105	9.50497	19.7458	11.839	7.4741	9.34175	11.0158	10.0416	10.2467	11.0296	10.8744	13.4528	8.79519	6.97273	12.0099	10.0058	9.74298	11.1459	10.4861	9.8451	8.69574	12.213	10.9943	9.29618	14.2522	7.47876	10.5317	7.90297	10.75	10.5702	13.2065	8.46128	13.1314	10.2347	7.96189	8.10164	8.48514	10.4568	13.1801	6.70862	9.3492
C9orf66	0.2232	0.301769	0.447527	0.262438	0.389014	0.400554	0.334306	0.189383	0.229189	0.498306	0.217951	0.212801	0.368533	0.271281	0.33395	0.220358	0.269318	0.259649	0.18521	0.0825135	0.310224	0.430628	0.406137	0.153853	0.253755	0.347631	0.357795	0.446753	0.331247	0.52528	0.250389	0.299351	0.301524	0.243616	0.208411	0.438025	0.318109	0.208287	0.150235	0.356263	0.338418	0.324394	0.309872	0.255215	0.721951	0.378878	0.344017	0.54319	0.239915
AADAC	1.40805	3.2284	3.37723	0.969232	10.5484	11.9032	6.32876	13.4317	12.0569	3.73103	1.14385	4.46728	1.54731	13.9937	8.71992	3.96738	2.26149	17.9915	9.43507	5.42753	7.48935	1.26423	6.31424	17.9295	3.18398	8.04779	11.6717	12.3745	3.90738	2.77348	5.82918	5.97388	4.75492	8.19067	1.92581	1.94677	21.7777	3.95349	2.59729	12.3403	6.6269	5.60402	4.82718	34.8249	12.8704	5.92387	2.86272	7.72083	6.71533
BZW2	8.31598	9.91433	6.82791	11.5016	7.55802	7.93317	7.05923	17.1593	6.5832	10.9193	7.67309	8.58006	8.71432	5.9942	14.409	11.9107	7.71706	7.25038	13.6011	13.1893	7.49501	14.5459	6.99443	9.80759	9.39186	7.22055	7.50491	14.4429	13.5293	13.3635	8.62532	11.2905	9.10258	12.7938	16.9518	12.9708	10.0378	11.2776	9.97836	6.62013	8.47261	9.62867	10.2607	11.4674	7.47856	9.70806	7.83104	12.5521	9.74214
MVK	3.30209	3.97644	4.05068	2.88754	3.25974	4.37165	3.37469	2.45803	3.38979	5.4631	2.75104	2.83312	5.40347	4.88507	3.8528	2.83523	4.67175	3.57762	1.98711	2.43267	3.93811	5.12089	3.57901	2.95031	4.18122	4.76399	3.79512	3.31821	3.56673	3.55191	4.04611	4.14834	2.57871	4.05651	3.73876	4.58961	3.73323	4.24874	2.30266	3.83518	3.06591	3.46395	4.38357	3.60489	4.32903	3.45863	2.36813	6.8767	5.20864
TSACC	0.0708029	0.0303747	0.114823	0.0254375	0.119772	0.0827579	0.0937385	0.0619528	0.0714043	0.15649	0.0259267	0.111382	0.120558	0.0575637	0.129476	0.0480571	0.0563853	0	0.193881	0.0431882	0.194849	0.116583	0.102859	0.0929167	0.0228996	0.0909763	0.137701	0.194862	0.0495364	0.0999766	0.050406	0.0870459	0.0338186	0.079694	0.0978959	0.185891	0.0555002	0.0545095	0.0693832	0.111883	0.0285694	0.0530595	0.11585	0.037106	0.17994	0.185914	0.0729977	0.0296156	0.100459
CYTIP	5.12983	13.8218	3.71983	8.72892	6.08711	5.13237	6.67723	6.97222	7.90584	2.63834	9.13292	7.99437	7.27794	4.49984	9.07549	5.90859	7.07007	9.53268	9.13771	10.6902	6.36939	14.0178	7.10943	14.0735	9.84676	8.82804	7.38569	6.79084	11.6734	6.8533	7.64016	16.1194	13.6766	10.1936	11.5222	10.6315	6.57098	12.34	14.2929	4.56104	4.36751	3.73642	8.94726	19.5883	3.54094	7.33712	8.16774	7.07051	7.2703
CLEC2B	6.75583	6.7145	7.67293	10.7409	5.60661	7.87614	6.56377	7.16611	8.46861	4.39855	6.50929	11.4241	7.27653	8.88059	5.97875	19.8044	7.56675	7.40498	14.7259	13.4534	8.0023	13.9123	6.08654	10.1455	5.77833	9.42095	10.197	15.99	7.26531	6.47588	6.17846	12.362	5.88439	18.0884	5.91107	6.6392	5.11389	5.31059	15.5428	7.10916	5.2528	6.94103	9.46675	7.98292	3.94219	8.69618	6.685	6.03348	6.64512
KCTD1	1.03076	0.90954	2.73679	0.868873	1.36971	1.34905	0.75227	0.929111	0.769297	4.22677	1.11966	0.921792	1.40771	0.926807	1.25662	0.567655	1.24297	0.871329	0.370506	0.539387	0.781849	1.19874	2.33967	0.754995	0.530646	1.41457	1.22042	0.883827	1.11808	1.51941	0.621946	0.650534	1.01775	0.692523	0.62079	0.783202	1.1483	1.1278	0.480251	0.909103	1.67658	0.363272	0.875481	1.0106	1.69225	1.98155	0.735937	0.677362	0.782268
NME9	0.190077	0.534564	4.41144	0.113815	1.81313	1.10674	0.242329	0.720711	0.379123	4.31782	0.371214	0.775222	0.870256	0.583799	1.13932	0.329702	0.285924	0.123377	0.17928	0.115943	0.319666	1.37169	3.06304	0.369546	0.0956294	1.23926	0.718803	0.622766	0.354627	1.81167	0.120284	0.250992	0.793564	0.095087	0.091775	0.286487	0.620814	0.065038	0.248354	0.845456	0.775495	0.0395675	0.541385	0.221365	1.95016	2.92992	0.108872	0.247351	0.179794
SELP	14.4488	10.1409	6.94798	13.3362	7.84441	4.5829	10.6116	7.79183	16.019	8.49102	15.1085	14.6965	3.70528	16.1041	3.04036	11.1697	14.1141	9.12736	9.40897	19.2895	10.1366	3.84466	7.31723	10.9737	6.26986	11.5971	8.61827	5.99429	6.25131	7.76963	12.1665	8.36148	16.6498	6.90629	8.29266	11.185	7.45607	5.2593	31.8907	3.62214	16.1283	10.2303	5.30918	7.50407	6.09374	7.52356	21.4092	7.39906	6.69182
CLDN16	0.115675	0.302475	3.39097	0.0870752	1.06226	0.682469	0.126406	0.597656	0.355527	1.74503	0.217841	0.265735	0.33765	0.2687	0.664815	0.142072	0.254426	0.0735508	0.223236	0.0806389	0.1718	0.769936	1.85651	0.0867447	0.0570093	0.95314	0.479935	0.389824	0.323722	1.58671	0.149016	0.234762	0.592856	0.0682003	0.0304644	0.241033	0.544043	0	0.172732	0.278536	0.915729	0.0412792	0.496708	0.311771	1.05459	2.00563	0.0302884	0.0552968	0.078155
RAMP3	65.7784	64.5078	102.799	33.9678	128.937	16.9311	87.2086	45.0028	162.557	17.037	67.662	52.6236	36.116	261.427	13.5311	155.4	89.8546	33.1724	88.1827	100.123	150.978	74.9496	54.1157	98.7862	163.612	98.5952	50.1064	70.8865	53.8591	42.9061	99.1917	190.1	78.3486	185.19	25.7559	61.5609	72.5724	31.4964	149.502	41.991	80.8316	153.127	85.099	17.7728	37.0242	75.296	96.6975	37.0941	30.2008
TIRAP	2.29185	2.8011	2.12488	1.78501	1.61773	2.01287	2.0471	1.19265	2.42107	2.16225	2.35066	2.6399	3.12192	2.40696	2.12066	1.41756	2.06589	2.2383	1.19797	1.75669	2.26876	1.87028	2.53903	2.09647	2.16864	3.05079	2.50549	1.00264	1.44581	1.84703	2.26157	1.18021	2.35564	1.50944	2.16684	2.2799	2.06793	2.00562	2.02508	2.59388	2.31527	1.20267	2.01438	2.03928	1.99274	2.21283	2.32701	2.75868	2.76052
VWA2	4.09554	4.20654	3.61472	3.33377	2.57909	2.54844	2.59634	2.2112	2.33951	5.8497	6.70819	7.07295	1.31938	3.06562	2.36163	1.40412	3.48535	3.43287	3.22858	1.95479	2.61067	1.99083	3.4917	2.46896	2.21993	4.48653	2.907	1.0061	3.14566	2.75223	5.13333	1.4211	4.13137	1.39305	2.38082	4.52086	4.08677	2.02532	3.47634	1.88957	5.5874	1.47859	1.90004	3.30885	2.62365	2.27117	4.95604	2.88099	3.50355
IGSF11	0.0120859	0.0276528	0.117601	0.034737	0.0749647	0.050228	0.0568924	0.0376008	0.104009	0.219637	0.041306	0.0422503	0.0329265	0.0262027	0.081038	0.0273442	0.0192497	0.0268966	0.0529522	0.0786363	0.0665206	0.053068	0.124856	0.0493444	0.0104238	0.062118	0.115959	0.0190072	0.0507347	0.164969	0.0286807	0.0264152	0.0667076	0.00453454	0.00954894	0.0493598	0.0505268	0.0248124	0.0368467	0.00848807	0.0260093	0.0241524	0.0263671	0.0168904	0.0546053	0.084627	0.0276902	0.0269617	0.137185
FAM129A	11.8154	10.9023	9.53174	12.9787	10.9029	10.254	11.6895	15.4816	12.6575	11.1885	12.3927	16.5103	10.687	8.79598	9.79882	6.68516	12.9839	12.0521	10.3079	9.66894	8.61984	7.62365	16.9319	12.0696	7.77398	15.5696	12.0966	10.1361	9.31548	11.3045	10.7042	7.68226	14.9909	9.45691	12.5388	9.56048	10.3852	9.47388	11.7633	8.63251	14.4207	7.8863	8.40542	10.8523	8.19597	9.76797	13.6821	6.66976	10.3021
MRPL48	3.76187	4.13888	3.80639	4.79826	3.56245	3.6011	2.70868	2.54617	3.19117	5.05903	2.99892	3.30344	4.63398	4.0633	3.20099	8.24647	4.1139	2.7564	2.01095	2.73383	3.76459	5.40061	4.22736	3.09436	3.10867	3.50772	3.67913	7.00599	3.23641	2.95459	3.37011	4.60276	2.79126	5.48024	2.41047	3.30798	3.57667	2.92389	3.16904	3.50792	3.15208	2.66402	4.28022	3.27325	3.72814	3.58408	2.95062	4.34413	3.03908
CAMKK1	1.72267	2.21254	1.80729	1.66952	1.57399	1.53502	1.60025	0.775384	2.02686	2.06043	1.35897	1.90144	3.02015	1.78095	1.49733	0.996033	1.43116	1.84586	0.958005	0.96647	1.89241	1.99413	1.49848	0.962897	1.61301	1.74439	1.63794	0.940693	1.49168	1.14867	1.86611	0.993571	1.47127	0.78697	1.82525	2.97335	1.57124	1.63325	1.54572	2.58774	2.08533	1.08776	1.84239	1.67744	2.34217	1.53572	1.33754	2.6821	2.42536
BRDT	0.0227691	0.0234433	0.0118161	0.0196328	0.038517	0.00354849	0.00803864	0.0159385	0.00734802	0.00670999	0	0.0286549	0.00620315	0	0.0083275	0.0741814	0.0145061	0	0.0199517	0.0222219	0	0.00999771	0	0.00796817	0	0.00780177	0.0035426	0.379569	0.0254883	0	0	0.0149294	0.0058003	0	0.0143917	0.00797065	0	0.00701177	0.0714003	0.00959462	0.0147	0.0204758	0.0066232	0	0	0	0	0.00761915	0.0129224
CDC14A	2.34505	2.50572	6.86673	2.59556	3.88689	3.10137	3.46466	3.25845	4.23345	2.96713	2.83216	3.08567	1.90473	2.90523	2.31065	2.40237	2.12852	3.53727	2.60051	4.83326	4.29569	2.6968	4.66933	3.17305	2.42611	4.24844	3.1812	2.73163	2.31327	4.5042	2.61311	2.05931	2.90345	2.46329	0.981062	1.71449	2.94571	1.86147	4.81492	3.01516	3.57339	3.06176	2.64276	2.45033	3.91149	5.24609	2.49784	1.71809	2.54196
C3orf30	0	0	0.00651872	0	0	0	0	0	0	0.0148071	0.0147191	0	0.0136886	0	0	0.0272829	0	0.0503181	0.011007	0	0	0	0	0.0175835	0	0	0	0.0158038	0	0	0	0	0	0	0.00793962	0.052767	0	0	0	0	0	0	0	0.0210658	0	0	0.0276281	0	0
FOXA3	0.459193	0.278111	0.286193	0.414055	0.167542	0.498139	0.174833	0.0420179	0.283304	0.185737	0.237386	0.339938	0.539651	0.195205	0.148185	0.415567	0.530605	0.285534	0.364898	0.351495	0.0825944	1.11356	0.287766	0.315092	0.104835	0.185107	0.210132	0.354	0.642539	0.559404	0.256399	0.723198	0.498871	0.395243	0.99593	0.393987	0.254081	0.180227	0.152936	0.265585	0.624891	0.485814	0.347026	0.509614	1.05259	0.189137	0.544597	0.617645	0.447127
GPNMB	78.1068	188.667	56.0562	39.5965	29.1039	43.558	69.0589	49.4769	71.157	30.4776	74.4548	44.74	146.799	40.6158	65.4444	33.5213	53.6175	49.5285	24.26	55.3102	47.2376	131.074	42.4142	95.6528	105.3	59.235	62.1698	52.3322	51.6536	38.9765	59.2884	110.945	84.1925	48.4203	145.019	85.1034	31.0401	51.7011	59.4591	30.8801	53.6121	182.858	90.4162	138.971	32.3834	38.7255	50.5719	55.6418	83.5198
LCN6	0.551818	0.120884	0.175172	1.16421	0.377362	0.0548929	0.393784	0.273954	0.691488	0.830395	0.756671	0.9358	0.0959588	0.343636	0.107351	0.892531	0.261801	0.5487	0.617282	0.486992	0.258485	0.240579	0.102339	0.102719	0.0607568	0.281606	0.264875	0.590861	0.558574	0.066314	0.016717	0.0962286	0.448635	0.264303	0.389603	0.226052	0.533789	0.307325	0.87441	0.0742113	0.4169	0.211165	0.110995	0.0738367	0.318277	0.143868	0.435772	0.314302	0.166585
JRK	2.36224	1.17628	1.73531	0.87647	1.41824	1.24222	1.22244	0.373203	1.61798	1.91906	1.44426	2.96771	1.42934	2.34732	1.15387	0.722944	1.09738	1.71323	1.07617	0.454574	1.74453	0.607112	1.8878	1.63613	1.24379	2.42402	1.87049	0.467142	0.900139	1.1342	1.35889	0.342853	1.05108	0.64098	0.849868	1.67356	1.24824	1.06628	1.30441	2.27376	1.41275	0.474176	0.567503	1.12009	1.28646	1.2184	1.58015	1.538	1.70826
RAD54L	0.258071	0.17925	0.191324	0.194266	0.197492	0.215462	0.119313	0.143374	0.104105	0.153916	0.0720007	0.244875	0.41013	0.0865905	0.404511	0.250235	0.156587	0.123069	0.484581	0.13493	0.360741	0.157384	0.160677	0.215031	0.230529	0.17896	0.243784	0.0869701	0.171959	0.147498	0.201224	0.080578	0.168268	0.186736	0.334977	0.333403	0.0674314	0.132455	0.248882	0.233031	0.228102	0.119723	0.0491523	0.193212	0.083285	0.161343	0.109807	0.32898	0.139492
BPIFA1	0.0365149	6.92394	22.0762	10.8361	0.0926547	1.50804	0.128916	0.0213005	0.01473	5.00378	1.36385	1.76157	85.8263	0	68.5436	3.27153	5.58324	0	0.119987	0.178186	1.07188	70.7871	0.229871	0.0638928	1.29909	0.0625585	4.30356	6.6614	0.408756	28.2552	43.2048	13.6471	23.6734	2.63042	8.66942	0.127825	61.2244	2.22084	0.0477103	1.50022	1.82702	0.0273642	6.50574	2.4112	4.51627	36.6584	1.38038	5.00972	12.2788
EEF1G	0.0726668	0.124697	0.0989905	0.104429	0.0491702	0.0905989	0.0384825	0.0763005	0.0469018	0.149903	0.117081	0.106693	0.148478	0.0472633	0.146173	0.305798	0.0578696	0.0849009	0.039797	0.0354601	0.133319	0.0744503	0.0844534	0.0762902	0.0470049	0.0622476	0.175244	0.274274	0.132185	0.0718259	0	0.0833816	0.0509064	0.179942	0.109085	0.152628	0.125315	0.0671333	0.0854517	0.137794	0.0469145	0.108913	0.142679	0.198031	0.110806	0.0381616	0.079914	0.206688	0.0515518
RGS7	0.0918679	0.262745	0.0198647	0.110019	0.0518023	0.0178966	0.216226	0.0357266	0.105001	0.0789635	0.0560673	0.14452	0.0208568	0.0497933	0.0699988	0.0519625	0.0365804	0.012778	0.0670837	0.0933958	0.0421366	0.0168076	0.252094	0.0535827	0.0198084	0.0393478	0.0476451	0.0601991	0.0107124	0.0324303	0.0545022	0.0376479	0.0828849	0.0344681	0.0181459	0.0267997	0.0600104	0.0117878	0.120035	0.11291	0.0370694	0.114743	0.038971	0	0.0778253	0.0536059	0.0526199	0.0512357	0
TMEM106C	14.6929	10.3991	10.0248	14.7568	10.1553	12.976	8.94297	7.10321	10.5116	11.2391	10.8728	9.29195	7.84484	12.2641	9.60706	24.3093	10.1948	7.46044	7.3718	7.73249	10.4304	10.9354	7.89338	9.63972	11.7195	10.7131	11.5185	19.7397	9.97375	8.82969	8.59618	15.2776	7.00623	23.212	8.12204	9.81172	12.243	8.71006	8.99406	9.17819	11.1744	8.64863	12.4237	7.57218	11.1335	8.8684	8.91608	9.76863	8.70307
C9orf116	1.52469	2.4347	24.8157	1.06513	11.4095	7.2028	1.19621	4.2741	2.38335	29.6116	1.67494	3.37571	5.0192	4.62553	5.18911	3.32024	2.49589	0.777591	1.17135	0.206673	1.82601	10.1351	14.9205	1.05603	0.506825	6.43968	5.43637	7.50989	2.1631	10.1068	0.814095	1.61413	4.81462	1.25136	1.01223	1.35288	3.71828	0.342366	1.75698	4.39478	5.86172	0.476084	4.3966	1.57591	13.6877	16.9223	0.756868	2.09041	0.49576
ZNF501	1.22153	0.857522	1.18205	0.921246	0.75995	0.971523	1.07815	0.229669	1.19322	1.3834	1.78181	1.38695	0.708209	1.23114	0.876901	1.66507	0.828077	0.91832	0.807209	0.862108	1.09276	0.428498	1.47637	0.874391	0.724851	1.36635	1.18588	1.25425	0.85463	0.577326	0.862445	0.496451	0.806875	1.22152	0.342975	0.927674	0.854647	0.784985	0.844192	1.07414	1.2465	0.529578	0.976408	0.581975	1.12033	1.12218	0.922864	0.971218	1.00982
LINC00336	0.00936701	0	0.0243052	0.0673061	0.0158455	0.0510936	0	0.0109282	0.0151145	0.0414064	0.164641	0.0196473	0.0637979	0.0710781	0	0	0.0298384	0.046903	0.0205199	0	0.0171853	0.0342747	0.0181439	0.0655606	0.060591	0.0320957	0.0655827	0.0147312	0.0262141	0.0264532	0.0133371	0.0153546	0.0119309	0.0527164	0.0444046	0.0327905	0.17622	0.0144229	0.0244778	0.118414	0.10583	0	0.068118	0.019636	0.0634816	0.0163972	0.0128765	0.0313445	0.0797425
RAB9BP1	0	0	0	0	0	0	0	0	0	0	0	0	0	0	0	0	0	0	0	0	0	0	0	0	0	0	0	0	0	0	0	0	0	0	0	0	0	0	0	0	0	0	0	0	0	0	0	0	0
UCP3	0.353582	0.496433	0.754127	0.269462	0.480317	0.985202	0.557961	0.381263	0.479769	0.623618	0.360961	0.685452	0.45975	0.383289	0.695572	0.0509074	0.315713	0.688518	0.287532	0.444426	1.18929	0.337168	0.64338	0.571818	0.26337	0.670016	0.441771	0.0926779	0.592212	0.400931	0.427165	0.166854	0.371892	0.0723606	0.275128	0.412587	0.445139	0.214472	0.699984	0.970723	0.389107	0.377387	0.148044	0.437989	0.48107	0.422015	0.353496	0.313721	0.714515
SP100	6.70703	8.32335	8.28254	6.73217	7.45363	7.84681	8.40201	7.27928	8.88532	6.63763	8.81819	6.57796	6.37488	8.06236	5.90654	5.87518	5.95163	7.87642	7.3995	9.46076	8.34498	5.32383	7.66675	8.99341	9.03106	10.1803	6.76908	5.83974	5.91596	7.37903	7.84824	7.015	6.22287	6.00702	4.41307	6.77865	8.53843	6.204	8.93097	7.26995	6.87691	6.55004	5.62929	7.35129	6.99361	9.1123	7.7492	6.11071	7.4457
MED24	10.8632	9.61258	11.4971	7.91974	12.6746	9.42145	9.12772	49.5938	8.9199	12.9198	8.31705	15.1031	9.93203	10.2394	11.6278	5.34914	8.67369	9.85597	12.7558	15.0302	10.5788	13.7567	11.2843	9.55366	10.2286	10.6995	9.75646	4.51626	17.4974	12.5932	9.80843	17.2262	11.4409	9.88845	15.8196	15.7392	9.98195	10.4716	16.0014	10.7989	8.67981	15.8568	7.77202	10.2868	12.1037	10.7339	12.3184	9.32492	10.659
KIF17	1.45263	1.20469	3.57733	1.53552	2.51706	1.18698	1.75367	1.22598	2.47575	2.49824	1.37104	1.49103	0.896148	2.84303	0.70245	2.76909	1.519	1.1349	1.24773	1.75598	2.03323	1.23431	1.89436	2.25592	2.02208	1.83059	2.62076	1.12489	1.08736	1.98259	1.30134	3.05427	2.12862	2.53953	0.561642	1.06648	1.69589	1.04016	2.00761	1.7303	1.98826	2.03822	1.68569	1.22176	1.27921	2.45012	1.96653	0.66486	1.03993
IGF2BP3	0.0973945	0.175089	0.0391108	0.0366573	0.0235365	0.0216837	0.053215	0.0189379	0.157155	0.0546702	0.115484	0.214013	0.110558	0.0477612	0.0466461	0.138508	0.0554014	0.0503161	0.264157	0.0452637	0.0340354	0.0865481	0.0561468	0.158246	0.213	0.0913754	0.160554	0.189638	0.0356929	0.0392929	0.085846	0.106434	0.0915631	0.0783035	0.146572	0.0730592	0.163596	0.0606995	0.103016	0.0342006	0.172169	0.0590849	0.0252951	0.102084	0.0510758	0.036534	0.111571	0.0310388	0.0658041
SPACA7	0	0	0	0	0	0	0	0	0	0	0	0	0	0	0	0	0	0	0	0.043227	0.0325039	0	0	0	0	0.0303527	0	0	0	0	0	0	0	0	0	0	0.05555	0	0	0	0	0	0	0	0	0	0	0	0
AC007319.1	0.12067	0.253088	0.356599	0.173414	0.317535	0.156717	0.284018	1.29833	0.36779	0.0592686	0.451692	0.478088	0.164375	0.188946	0.539409	0.564231	0.213551	0.17903	1.42454	0.359853	0.270586	0.529851	0.194782	0.492673	0.104075	0.160795	0.417218	0.126516	0.375225	1.02235	0.229087	0.109892	0.204933	0.120732	0.1589	0.0938718	0.357339	0.123868	0.525559	0.254244	0.259687	0.462198	0.136504	0.337281	0.1363	0.164295	0.331763	0.246763	0.323403
SPINK7	0.0510972	0.0438418	0.0828659	0.0734311	0	0.0597249	0	0.0298069	0.0515313	0.0564682	0.0187109	0.13397	0.0174009	0.0138476	0.0934405	0	0.0406923	0.0852856	0.0139921	0.0311682	0.093746	0	0.0371158	0.134113	0.0165262	0.0437707	0.0596257	0	0	0.0901892	0.0363771	0	0.0732189	0.0718923	0.0100928	0	0.120161	0.0590078	0.0333818	0.0807438	0	0.0191461	0.00928962	0.0267787	0.06493	0	0.0175604	0.0427462	0.0362497
INPP4A	3.01874	3.48001	2.85725	2.04112	2.67862	2.67535	3.52173	2.18961	3.42927	3.14474	2.96602	3.64149	3.71045	3.00143	2.72047	1.56034	2.50534	3.67461	1.95571	2.89579	3.35267	2.23874	3.27298	4.2084	2.65651	4.30513	3.17155	1.69233	2.42511	2.46203	3.64612	1.71978	3.39132	1.64922	2.88763	3.83249	2.71004	1.93114	3.61771	3.22902	2.82629	2.0682	1.80236	3.62999	2.23146	3.0103	3.39675	2.6368	3.8181
EML3	10.7705	6.74888	11.4385	7.71323	10.0829	7.289	7.67865	6.44219	9.26676	9.82084	7.40873	14.2438	8.08492	12.8016	7.07365	4.54827	7.83865	7.44035	7.02477	6.94693	12.0104	6.82968	9.46679	9.88215	8.39009	11.7637	9.73795	3.67489	7.97812	7.71586	8.39969	5.42737	11.6489	8.31939	8.32501	12.27	8.21158	7.13506	10.0378	10.1647	8.14071	7.44636	8.20104	7.98826	8.5516	9.67246	9.49826	11.4222	9.12008
PNOC	0.176383	0.111512	0.144528	0.0800455	0.266967	0.0578708	0.049162	0.129967	0.0674075	0.205182	0.0951825	0.0973585	0.22762	0.0905694	0.084881	0.176428	0.650579	0.139452	0.152524	0.203854	0.255475	0.122286	0.323672	0.601016	0.0600495	0.190853	0.19499	0.32119	0.415677	0.0262168	0.0793077	0.182608	0.242399	0.261227	0.183366	1.15366	0.072769	0.057176	0.218332	0.410745	0.059934	0.180879	0.14852	0.252987	0.0314571	0.113755	0.153137	0.994059	0.118545
KCNC3	2.21982	1.88844	1.87034	1.47756	1.4946	1.89636	1.73171	1.56636	1.49161	2.78441	1.92046	3.13922	2.8482	2.37565	2.35166	0.431094	1.3271	1.73183	1.83219	1.75681	1.81133	1.25634	1.36729	1.87057	2.51385	2.05775	1.57034	0.469759	2.30541	1.31861	1.93849	0.886499	2.10255	0.704274	2.19853	4.13855	1.54781	1.62185	1.53237	2.54387	2.08577	1.49388	0.679096	2.06965	1.82724	2.11356	2.19139	2.45675	2.12353
JUP	65.4389	37.8837	57.9078	35.64	58.8487	50.3448	51.4626	51.0649	49.1936	64.5116	34.6057	65.0103	35.0553	57.6596	43.964	26.51	44.9259	46.5528	45.4401	35.7118	48.8482	28.8429	48.564	35.2468	43.7916	57.0618	46.5207	28.3883	40.0055	48.0734	46.2404	30.1067	43.7228	26.8267	37.1408	48.7765	38.8551	36.9686	37.6427	53.363	52.2622	54.6183	34.1212	42.9303	61.8235	46.1608	42.9855	32.4067	42.8657
CD3G	2.16605	2.32201	1.38841	1.35307	0.870348	1.0063	1.31693	0.636271	2.46568	1.02345	1.62025	1.04679	0.672812	1.34971	2.2957	2.39562	1.76186	3.55522	0.512829	1.73237	2.74685	0.790694	1.56963	4.32126	1.68401	4.40731	1.48093	1.70729	1.32467	0.879063	1.26734	1.8217	2.30677	1.37249	1.18699	1.35081	1.04859	0.958569	2.4537	2.50409	1.83523	0.640041	0.54252	2.77187	0.662502	1.97243	0.799213	2.36728	1.48191
NR1I2	0.03301	0.0314698	0.0999287	0.0421673	0.0372272	0.0285805	0.0194236	0.0342328	0.0295914	0.0864705	0.0429783	0.0307726	0.0399694	0.0357834	0.033536	0.00497897	0.0175254	0.0306091	0.0281219	0.0268472	0.0874785	0.0402621	0.0710449	0.0385066	0.0332153	0.0314188	0.0456529	0.0057682	0.0256612	0.0517905	0.0261116	0.0240491	0.0537247	0.0288985	0.0202851	0.0449384	0.0230005	0.0112949	0.0335462	0.0231833	0.0295995	0.0164917	0.042676	0.030755	0.0372856	0.0513644	0.0504197	0.05523	0.0416323
DUS2	2.2552	2.64308	2.19296	1.76316	2.06053	2.21471	1.99439	1.25118	2.15774	2.46461	1.991	2.1476	3.85953	2.34899	2.09834	1.82726	2.26342	1.61319	1.40186	1.89518	2.6234	2.39969	2.06876	2.68735	2.3352	1.89025	2.30716	1.4853	1.95761	1.67011	1.98569	1.88093	2.06864	2.31486	2.49313	3.26754	2.21405	2.17453	1.94905	2.39902	2.32929	1.93809	2.11821	2.60895	2.23574	2.41812	1.55311	3.26374	2.28557
ENPP2	48.2922	16.2871	8.36585	82.9893	7.45728	15.4409	21.9009	6.61791	12.854	20.2863	59.6768	154.12	6.26465	11.6463	7.61625	16.2049	12.6085	27.9825	11.6425	17.2181	7.72187	3.16814	13.8879	12.3787	6.78073	18.0345	22.4863	9.69123	6.37369	7.42165	13.0755	8.00989	21.8883	9.90071	10.3145	9.52305	10.0793	12.1664	25.4617	8.83694	27.9399	9.57009	7.27328	17.9413	9.58593	9.03644	29.1226	8.77921	8.86406
CTGF	433.861	188.857	483.539	342.306	509.291	305.078	199.772	147.123	266.881	133.507	423.86	297.441	65.3204	205.118	96.8403	156.238	96.8713	241.111	439.979	187.04	339.028	98.2753	223.442	271.12	229.383	117.413	128.021	89.0156	119.026	245.741	464.928	179.741	340.203	318.196	69.2204	146.125	563.81	102.834	278.766	186.03	264.155	220.104	157.429	166.235	152.512	235.624	367.513	30.0849	69.3668
MUC15	2.95221	11.9587	22.1912	5.04546	10.0578	18.6282	10.184	15.9452	9.96384	10.9444	9.55283	6.10591	5.31921	12.0105	13.7655	11.3123	8.1116	15.3027	6.9053	11.0199	8.21077	7.78116	25.8754	4.09552	12.7589	11.3348	7.09122	12.3563	4.83866	20.5609	11.5554	5.66836	6.01122	2.27707	1.19413	5.10555	14.604	8.9012	6.31623	13.0474	7.2993	10.1717	8.03157	3.82171	16.9187	20.2805	7.31627	5.31334	8.99498
GPR135	0.344999	0.26539	1.99875	0.32483	1.00623	0.63655	0.294004	0.601438	0.454308	1.62438	0.255568	0.723634	0.378122	0.395478	0.48586	0.290689	0.25264	0.377269	0.291016	0.309615	0.31284	0.380165	1.19442	0.333059	0.112865	0.815259	0.57071	0.255693	0.28854	1.15349	0.197618	0.20801	0.585909	0.196393	0.122191	0.333163	0.39788	0.122118	0.523313	0.476238	0.640043	0.172361	0.423913	0.199509	0.799524	1.14539	0.327074	0.218948	0.196926
SLC38A2	29.2338	20.8224	31.3767	44.5719	48.1278	25.0931	37.1772	28.8503	30.8092	36.9923	69.6785	34.4054	16.6267	18.3451	21.7029	47.2652	23.6356	39.5828	83.3864	48.2059	33.8291	18.8297	34.8794	53.0408	24.7479	27.9486	40.7422	27.1036	31.7871	36.218	32.3493	44.451	40.872	52.8718	28.2155	22.2537	51.3987	44.1014	50.7038	29.8237	32.2602	23.9262	23.4396	41.6614	20.7968	25.2811	39.4387	16.8558	22.2853
EMX2	0.0121007	0	0	0	0	0.00942929	0	0	0.00488141	0.0267454	0.0177243	0	0	0.0262348	0.0110642	0.02464	0.0578199	0.0100986	0	0	0	0.0309943	0.0234391	0.0211735	0.00782742	0	0.0235341	0	0	0	0	0	0.0231194	0.0340507	0.014341	0.0317702	0	0	0.0079054	0	0.0195309	0.00906827	0.0615986	0	0	0	0.0249517	0.0202461	0.00858459
RETN	14.3088	18.4319	12.9013	7.90885	16.6933	28.5993	17.6207	36	16.8112	2.68441	12.3416	22.6886	74.2424	21.1477	42.0604	19.5787	29.863	8.80553	13.0122	26.763	20.7508	52.3294	14.9609	10.8251	23.9618	8.71332	23.9458	13.4899	28.307	14.2558	30.6953	68.1882	34.8313	31.5278	56.886	38.1986	11.841	47.3368	12.5466	17.113	15.4374	19.455	79.1318	19.5727	24.6934	22.1246	28.1221	123.132	27.7337
MMAB	3.62094	6.75741	5.13536	5.12244	4.6497	6.64801	4.71912	3.72659	4.42001	6.75939	3.77784	4.57405	6.87712	6.07482	6.18546	7.74366	5.25745	4.0902	2.74603	4.39442	5.71636	8.04143	5.07495	4.32636	5.48818	4.45642	5.15286	7.98913	4.7418	5.21038	5.4505	6.61957	3.61491	7.53675	4.3731	6.45862	6.01118	5.60434	3.81277	6.9217	4.13253	4.61346	7.9703	4.49908	6.36881	6.24518	3.27813	9.82242	6.74029
SYMPK	8.38254	7.6671	9.02145	6.12997	8.17387	8.09476	7.20523	6.39124	7.71737	10.0695	7.45827	9.27027	8.09468	8.65403	9.10774	3.14101	6.92701	8.26019	5.86616	6.09865	9.37601	6.35192	8.14548	8.30533	8.07457	9.54129	8.10154	2.72771	7.62392	8.18643	7.33998	4.04553	8.51511	3.84389	7.70427	9.59506	8.21571	6.93961	6.67493	9.54282	7.30433	6.06476	6.22282	8.35794	9.08968	8.73477	6.51722	9.41427	8.43144
LCK	6.21229	4.46296	2.89874	2.74369	1.60983	2.15557	2.22246	1.27576	6.03258	3.14414	1.65363	2.82674	1.66669	4.27378	4.21553	4.48537	4.97082	5.90955	1.08768	3.11514	5.43303	2.24934	3.33175	8.06725	3.41817	9.46841	5.07649	4.48987	1.76997	1.37715	3.9724	3.16835	4.15964	4.31786	1.63453	3.67278	1.78846	1.64732	5.885	5.26794	3.28185	1.54149	1.54744	6.04675	1.15169	4.37682	1.08881	6.81394	2.67533
HNF1A	0.0392528	0.0269434	0.190972	0	0.0863217	0.0397632	0.0138582	0.00915903	0.0696717	0.115677	0	0.0246998	0.0106939	0.0893566	0.0358904	0	0.00625194	0.00655162	0	0	0.0432093	0.034471	0.148264	0.020605	0.0101563	0.0403495	0.0396971	0.0123463	0.0109851	0.0775972	0.0167669	0.0128688	0.0524969	0.022091	0.00930395	0.013741	0.0369229	0.0120879	0.0307726	0.0165406	0.0506841	0.00588319	0.0285451	0	0.0798065	0.116812	0.0485635	0.0197025	0.0111388
FOSL2	16.1293	26.5046	27.2388	65.345	55.4841	19.4684	33.9633	101.295	28.6693	28.9998	28.3428	54.9259	9.30832	9.45819	27.1505	17.699	16.3784	46.2066	81.0914	45.2751	31.5295	28.2006	20.2257	39.1614	18.9009	23.3199	45.649	6.04988	85.5431	50.8462	43.9327	18.7278	56.3395	21.4698	62.6917	38.3869	39.5187	30.941	89.1372	22.8977	21.9339	56.479	20.1119	49.4027	17.0162	22.7897	77.1126	12.0191	30.1001
DDX19A	4.64158	4.22064	4.23862	4.0813	4.17281	3.85738	4.7852	4.24005	4.30653	4.64649	4.31048	4.50653	4.21078	4.13677	4.33587	2.94584	4.38616	4.08126	3.5667	4.16225	4.35882	3.78899	4.0134	4.0483	4.67389	3.97606	4.25114	2.73926	4.13462	4.1149	4.35028	3.55328	4.39596	3.34204	4.56328	4.05375	4.41484	4.91441	3.95768	4.40582	4.54905	4.6259	3.68338	3.82184	4.29286	4.69504	3.98625	4.26328	4.2332
NR3C2	4.40908	5.6489	5.76677	5.19863	5.14922	4.27367	7.61965	7.28726	6.5023	5.47114	8.61954	4.66161	2.42517	5.18105	5.04198	4.06724	4.58652	6.35697	3.12143	6.60335	5.40921	2.54021	6.60781	5.85934	4.59494	4.96932	5.77243	3.47641	5.22905	6.0149	6.8988	3.69206	4.70848	2.41077	2.07456	5.69385	6.98721	3.14607	5.6399	5.02874	4.61407	6.60831	3.72117	4.32705	4.41331	5.15594	6.56199	3.06374	6.22617
CCR8	0.464207	0.231267	0.0679965	0.0215196	0.101325	0.198366	0	0.0174703	0.289951	0.154452	0.0219334	0.219862	0.0611937	0.0811628	0.328601	0.0203277	0.214653	0.199949	0.0984115	0.4019	0.164838	0.0767098	0.203038	0.550239	0.0968628	0.333511	0.209685	0.117749	0.0628602	0.148012	0.106606	0	0.581733	0.117984	0.0236622	0.20968	0.070428	0.0230569	0.254352	0.631003	0.169184	0.0897745	0.0217792	1.31842	0	0.314558	0.144094	0.0501083	0.106233
CDK2	6.63452	5.09669	5.84575	7.11619	7.12487	6.12165	5.4666	7.63388	6.30956	5.60861	5.73117	7.06957	4.83975	6.13705	4.68984	6.16474	4.57717	6.30238	12.2856	8.63177	7.15075	4.29146	5.02655	5.2679	5.86853	6.13911	5.52399	4.09704	6.38287	7.31422	5.97533	5.24246	5.15811	5.89312	6.95176	6.42282	7.19105	5.1819	9.87392	6.35386	5.51367	6.87481	3.94011	5.56742	5.1352	5.44763	5.83166	5.30853	5.94721
RPLP2	241.146	267.72	226.58	253.147	204.333	226.975	177.726	179.177	233.57	257.595	179.497	209.779	221.374	269.768	202.426	441.223	249.5	184.186	180.848	204.517	234.463	339.962	187.617	174.507	254.965	227.108	277.284	433.208	220.961	193.198	201.295	360.01	205.081	390.854	216.074	224.409	209.056	246.874	206.919	235.694	220.589	230.654	395.203	250.99	211.067	233.979	184.587	366.63	191.995
GDAP1L1	0.011661	0.0300158	0.0226933	0	0.00986309	0.0227166	0.0411693	0	0.00470404	0.0257735	0	0.0611475	0.0397111	0.0189612	0	0.0158298	0	0.00973163	0.0127727	0	0.0427881	0	0.0282343	0.0204042	0	0.0199781	0.0544294	0.018339	0	0.0329317	0	0	0.00371322	0.0328135	0.00460662	0.0510263	0	0.00897756	0.00761814	0	0.0188212	0	0	0.0122225	0.00987856	0.0510325	0.00801501	0.0292656	0.0330906
WBP1L	25.4576	19.1688	23.4254	22.4928	21.47	17.8112	21.1104	22.1222	22.0938	25.0596	24.6338	23.2851	15.9322	20.1151	18.8592	24.2197	20.303	20.7145	17.1942	17.5364	20.6295	19.7672	23.2313	23.426	18.7696	21.1518	24.2194	19.4671	22.8687	20.1348	20.1061	19.2707	28.7352	26.1066	23.5704	18.5353	20.1578	20.8911	20.9504	19.5822	25.7012	20.5082	19.4115	18.7489	17.6685	21.9916	23.924	19.6385	17.2426
PTPRN	0.02628	0.00409972	0.0402944	0.00343334	0.0323317	0.01117	0.0210867	0.00836187	0.0366227	0.0281623	0.00699874	0.491089	0.0130175	0.00776946	0.07864	0.019459	0.0152208	0	0.0183179	0.0757794	0.00438317	0.0192322	0.226756	0.0167215	0.0185448	0.0245584	0.068767	0	0.013372	0.0371085	0.0170084	0	0.0197797	0.0268911	0.00755038	0.012545	0.00374548	0.0183931	0.0468238	0.0100673	0.0694091	0	0.0225859	0.0100165	0.0485737	0.0418218	0.00985262	0.00399726	0.00677955
PPARG	11.8876	18.4657	5.64512	20.3783	7.47608	14.6988	9.67859	10.3861	7.75693	2.7313	10.4173	14.9074	36.0342	10.7396	16.7344	14.7004	12.8272	7.09962	7.02603	9.36675	8.26927	40.6063	8.26757	7.64768	10.5956	9.57725	13.3348	12.9264	14.7093	13.5003	13.495	15.5523	9.67391	12.8863	12.9727	9.7248	7.47915	12.8962	14.7102	8.87982	9.72339	6.85781	23.3804	12.322	10.0581	10.8019	17.4211	19.5957	12.0082
C9orf131	0.0308782	0.0264937	0.0300456	0.0221873	0.0435288	0.0601532	0.00908461	0.048033	0.0332165	0.090997	0.0301521	0.0755614	0.0701029	0.0111575	0.0470553	0.00698614	0	0.00858972	0.0225478	0.0251134	0.0849764	0.0338957	0.0249213	0.0900497	0.0066579	0.0617184	0.0240213	0	0.00720119	0.0218006	0.0293104	0	0.00655502	0	0.0203304	0.0720622	0.0242045	0.00792413	0.0336211	0.0542152	0.00830637	0.02314	0.0112275	0.0215766	0.0261582	0.0270266	0	0.0258316	0.0511136
LBR	8.12053	9.81825	9.98017	11.152	9.3866	6.36289	9.17875	7.99355	11.6978	7.87187	11.3884	11.4024	7.983	9.89756	7.51074	9.96859	10.1653	9.98837	11.107	12.3021	9.64298	7.80001	8.6683	11.9887	8.22283	11.6419	9.35178	8.1833	6.51934	8.91134	10.6269	6.98489	8.98521	8.40499	8.27575	9.73852	9.32891	6.57263	11.9298	8.36882	9.39227	7.97896	7.98846	8.71221	6.31631	9.84485	11.0443	9.23996	8.71463
PRSS16	2.88023	2.45205	2.64768	2.47705	2.83376	3.59332	3.04269	2.0153	2.61573	2.78717	2.70503	2.56676	2.14974	2.70161	2.87912	1.9904	2.32938	3.00771	2.36201	2.57615	3.37452	1.67368	2.90513	2.26528	2.78016	3.27263	2.04909	2.12988	2.51629	3.11347	2.43828	1.38826	1.72738	1.52857	1.39427	3.27164	3.84866	2.74018	1.98402	3.78885	2.12567	2.94689	2.17322	2.89377	4.48802	2.93242	1.75914	3.17105	3.3667
LZTR1	7.13599	5.17699	7.45868	4.72213	6.61899	5.0538	5.56067	3.78481	6.15979	6.61599	5.48247	8.20157	6.47205	6.93425	4.37052	3.5245	5.59552	5.68935	4.27147	4.70332	8.22331	4.32192	6.50393	6.28889	6.29202	7.35685	6.73601	3.01103	4.69657	5.65779	5.12861	3.84919	6.53748	5.16266	5.47709	6.5743	5.76977	5.35307	6.35129	7.49552	4.90303	4.50209	4.58154	4.36948	5.81951	5.8298	5.47212	6.3849	6.10387
AQP4-AS1	0.0284221	0.0877909	1.42519	0.0367605	0.336558	0.232548	0.0200688	0.192324	0.0687924	0.556997	0.0582828	0.0774998	0.205195	0.0677822	0.223492	0.0771655	0.0497959	0.0521828	0.0498104	0.0138695	0.0677883	0.330716	0.798278	0.0696251	0.0441239	0.23373	0.137086	0.201144	0.0874949	0.345145	0.0242811	0.013977	0.173768	0.0607833	0.0426663	0.0845711	0.151499	0.0481393	0.0816998	0.17965	0.270657	0.0425989	0.177752	0.0953298	0.370795	0.606995	0.0234425	0.0808416	0.0927516
MT1B	0	0	0	0.0746389	0	0	0	0.0605942	0.041903	0.0765292	0	0	0	0.0563013	0	0	0	0	0.227555	0.126723	0	0	0	0	0.0671922	0	0.0404043	0	0	0.220014	0	0	0.033077	0	0.0820706	0.181815	0.162849	0	0	0	0	0	0	0	0	0	0	0	0
STEAP2	2.00194	0.788888	2.25499	1.83227	1.73158	0.922927	1.83892	1.57204	1.46533	5.53592	1.52585	0.959514	0.589206	0.969688	1.15128	1.35573	1.41393	2.10161	2.55741	2.18258	1.02209	1.12365	2.38412	1.31955	0.583026	2.47922	2.18457	1.24653	2.44636	1.19916	0.393387	0.753582	1.52735	2.05706	0.855267	1.39131	0.649716	1.43315	0.923198	1.21194	1.63387	1.36108	1.30103	1.24381	0.886333	1.47076	1.27638	1.29585	1.26921
DPT	50.9762	16.1943	31.8851	118.231	50.9584	33.7033	45.7439	24.5858	43.6594	44.4032	66.6056	45.8471	3.14605	42.9328	8.02255	24.2117	47.997	65.3298	22.114	28.3375	30.6543	10.9013	38.3256	53.7153	36.7842	25.691	81.0579	38.5985	21.3851	14.6052	41.5699	15.0167	46.9975	112.952	8.38168	18.3362	18.3292	10.8897	17.0232	26.5424	50.1011	13.366	22.5252	25.2501	19.3407	29.4227	58.7125	13.4785	14.9736
OSR1	3.16361	1.23759	1.53132	1.373	2.55949	1.64249	2.74306	1.19271	2.4984	5.42292	1.50286	2.05074	1.02798	2.46627	0.584641	2.49802	2.54605	4.46749	2.43092	1.10659	2.35985	0.848809	3.60402	1.20989	1.1254	2.96794	8.77144	1.4733	1.4149	0.640413	1.21743	0.871415	3.7052	2.85373	1.90916	1.97808	1.01992	1.72867	0.835456	3.30534	3.15009	1.05307	1.55176	0.911783	1.21562	2.20608	2.20767	2.05878	1.55074
ZNF497	0.359578	0.382392	1.5638	0.218343	1.12231	0.83664	0.429124	0.407693	0.559783	1.06713	0.259633	0.435533	0.427723	0.50508	0.379714	0.1925	0.282324	0.253592	0.177513	0.32128	0.641121	0.400278	0.941752	0.620319	0.504502	0.876341	0.539761	0.294696	0.255118	0.593555	0.338918	0.116225	0.638623	0.216618	0.284099	0.505274	0.492267	0.311922	0.489676	0.554868	0.564021	0.258081	0.320417	0.35035	0.858069	0.91315	0.292403	0.321995	0.323359
SLC25A35	2.10683	2.16399	2.08287	1.73947	2.08184	2.18237	1.69861	1.25853	1.83462	2.05217	1.49104	2.19891	3.97368	2.12463	2.01897	1.06562	2.1134	1.58072	1.115	1.68054	2.20211	2.22006	1.73145	2.64079	2.1687	1.77003	1.74536	1.29029	1.62992	1.53752	1.88929	2.19167	2.24485	1.71014	3.06106	2.46432	1.58002	2.71372	1.81974	2.12344	1.6185	1.8673	2.16926	2.57985	1.96498	1.91495	1.63606	2.55901	2.69466
DPP4	12.8331	14.1854	6.13173	10.8717	7.65178	11.2189	10.593	5.12093	5.72204	11.507	14.105	9.15706	12.1514	5.19807	14.6124	7.14592	11.3464	12.6203	9.33934	10.4789	5.7108	13.0535	12.0473	12.2927	12.8506	13.5278	16.0709	13.5333	12.3059	8.32326	6.60317	11.4643	6.44146	14.5999	12.1659	17.4621	13.7812	12.1398	7.53184	7.51301	10.0036	5.26181	8.89687	15.8505	6.19512	6.89738	7.76172	7.77246	14.3732
TNPO1	6.94734	7.95725	8.07055	8.21969	7.48459	7.07003	7.87721	6.02128	8.29594	8.474	9.45185	8.82755	9.46354	6.67183	8.22355	6.79359	7.37774	7.8304	8.52291	10.7149	6.64207	7.23193	8.33721	8.82886	7.34419	9.91773	7.76847	7.27182	6.51619	8.16485	8.8525	6.46393	8.19305	7.42654	7.43281	6.97415	8.09121	7.14499	8.42284	6.80494	9.56153	5.46565	5.86945	9.23702	6.94353	7.93556	8.50146	7.29244	7.54725
SNX21	6.37328	3.74828	6.19987	3.89238	5.76423	8.39311	6.1179	6.8126	5.59621	6.74459	3.5691	6.42435	3.80852	6.4615	4.60684	4.30936	4.84742	6.6191	4.52983	4.45308	6.77702	3.84706	6.27595	3.5927	4.6909	5.8711	6.70258	4.02297	6.89395	4.74299	4.43014	3.53279	4.55349	4.95542	4.58291	5.08062	4.02557	4.49184	4.28733	7.73163	4.99839	6.62037	4.77239	4.0091	7.39341	5.82047	5.1646	4.8322	5.81271
TERF2IP	22.0434	21.0283	25.7457	22.4199	24.2075	20.6907	20.6109	19.6868	23.1614	21.3525	21.4737	20.5208	19.0554	23.8638	20.497	19.1801	21.4248	21.0674	18.7708	25.4527	22.0214	19.017	24.5792	23.8131	21.0445	23.0556	23.1418	16.6354	19.7378	22.689	19.5271	25.1234	20.1874	21.5375	17.0932	20.9375	21.6013	21.1617	21.6587	21.1423	18.6378	20.2136	19.8955	22.8844	21.5735	23.0667	21.7673	19.5255	19.5498
SHH	2.8441	1.81507	2.0889	1.37929	1.63686	4.5759	1.70809	2.33549	1.34958	2.32049	1.21073	1.87346	1.53686	3.93662	1.75514	0.893416	2.01537	2.02043	2.56598	1.44331	2.14899	0.587711	1.65043	1.57658	1.59645	3.0739	1.67007	1.3246	2.5983	1.57652	2.04708	0.71922	0.853252	1.10236	1.63424	2.11877	1.9346	1.80356	1.16704	3.01267	3.18043	1.55008	0.826164	1.91345	3.77665	1.13152	1.94946	2.45792	2.429
RANBP3L	1.02115	0.785515	1.11544	1.51808	1.44943	0.631081	1.2328	0.629906	0.658138	0.415074	3.22349	1.05862	0.303779	0.737961	0.236102	1.1711	0.738432	1.71418	0.822797	1.47486	0.764456	0.317814	2.11437	1.81758	1.31347	1.11604	0.538724	0.553768	0.361323	0.596649	1.70463	1.57768	1.4352	1.86939	0.602778	0.441697	1.15007	1.1205	1.78664	1.1252	0.880913	0.448592	0.721251	0.787357	0.417614	0.647215	1.99266	0.461494	0.51626
LGI4	1.25856	0.702465	2.01986	1.15779	2.42369	0.675299	1.75274	0.91961	2.27323	1.21278	2.09859	0.822091	1.1449	1.1141	0.374293	1.0582	2.07392	1.29382	1.07325	2.07198	1.83763	1.14731	1.83048	0.723904	0.681707	1.44742	1.68375	1.06841	1.26749	1.2606	0.911496	1.07079	1.86376	1.1176	0.801691	1.14336	1.3245	1.83058	1.30872	1.63323	1.216	3.35491	2.25484	0.575134	1.18054	1.34171	1.43676	0.837922	1.05042
TP53TG5	0.259688	0.245096	0.336915	0.242576	0.307508	0.298477	0.240667	0.295397	0.199039	0.526139	0.27577	0.435756	0.221089	0.204092	0.356165	0.079318	0.227489	0.238393	0.291555	0.205925	0.297775	0.17104	0.38355	0.318077	0.159582	0.355925	0.353538	0.0612605	0.181688	0.36669	0.212609	0.0425685	0.22327	0.146149	0.282118	0.352266	0.21374	0.219921	0.330825	0.369323	0.282922	0.252993	0.165242	0.408288	0.263992	0.28412	0.240965	0.336731	0.386883
GGT6	9.53411	1.66071	7.14055	5.50028	9.30514	2.86079	3.31752	2.11974	6.30176	10.7732	5.6335	4.12528	2.30487	5.93578	3.00286	1.94942	4.38555	2.0113	3.61777	2.31558	5.2235	3.78333	5.59349	2.55646	3.94991	6.2042	3.39033	3.26981	5.02358	3.97617	2.97816	2.54845	5.20505	3.20465	3.93658	6.72099	5.39345	1.60549	2.58608	4.94629	9.51315	2.50795	3.18742	4.3716	6.14616	7.62897	5.38153	3.42645	2.30331
BPGM	9.11803	9.49739	14.0836	9.4282	8.81016	9.24931	9.37194	15.4896	10.2538	11.2018	9.19964	7.0598	6.95671	9.90939	9.66607	10.9848	7.9856	7.29152	6.31758	12.7073	9.69767	10.0802	8.97386	9.62982	10.0161	9.74833	7.92777	12.1147	8.17946	8.25407	9.17527	11.7099	8.4059	21.2085	4.91325	7.9049	10.9678	7.8875	11.9136	7.58289	11.8311	13.3166	7.03209	7.02317	8.23133	10.9811	8.32411	7.03607	8.31595
2020-03-01	1.98291	3.5522	1.51849	1.71739	1.16617	2.05725	1.79196	0.618676	1.85803	1.26136	1.76984	2.6377	3.97036	1.64447	3.29017	2.18531	2.63339	2.0547	1.01647	1.86686	1.90759	2.41577	2.01216	2.98581	2.23944	3.28038	2.20558	3.96137	1.63775	1.11249	1.7474	1.90617	2.2965	3.44487	3.35331	2.07514	1.13718	2.39415	2.35578	1.87545	2.24675	0.709641	3.26274	3.9662	1.26748	2.67547	2.11923	2.65223	2.33783
FXYD6-FXYD2	0	0	0	0	0	0	0	0	0	0	0	0	0	0	0	0	0	0	0	0	0	0	0	0	0	0	0	0	0	0	0	0	0	0	0	0	0	0	0	0	0	0	0	0	0	0	0	0	0
CRTAM	1.19524	2.3929	0.875853	1.27235	0.536681	1.0866	1.17217	0.886601	1.07742	0.717515	1.96684	0.913052	3.37689	1.27167	1.52461	1.83286	1.58643	1.42849	1.21221	1.9802	1.17765	5.76114	0.907498	1.76866	2.09991	1.94661	1.20533	2.30905	1.41438	1.4377	2.038	2.62445	1.86072	2.41663	1.87704	1.25265	1.44586	2.66969	2.51608	0.854979	1.04794	1.0063	2.60759	3.20159	0.850036	1.4982	1.1968	2.61702	1.04684
RNF39	1.52093	1.59667	3.51119	0.874283	1.16535	4.39206	2.89013	2.13975	1.73235	3.01885	1.25802	1.21976	2.26678	1.46445	1.79966	0.63154	1.51047	1.38874	4.90955	1.3534	2.42928	1.36184	2.14021	1.17409	0.937523	2.49841	1.97662	1.12561	2.1908	2.42554	1.96174	0.777271	0.877455	0.453156	2.45282	1.26842	2.06182	1.6393	1.29755	2.4505	1.28517	1.11296	1.22965	1.21906	2.63752	1.47217	0.922399	2.05074	1.73908
S1PR2	8.69455	3.71581	6.76953	4.5846	7.74546	4.10455	6.89592	9.27589	8.75729	5.27714	4.0675	10.0083	4.45822	5.1127	3.71796	5.69944	7.53838	9.31597	15.4619	8.18714	5.52946	5.04832	5.72585	5.9967	3.58546	8.65617	8.54694	3.69137	7.3012	6.02183	5.98585	4.35335	5.82144	7.65917	7.24819	6.3554	3.54159	7.17731	4.94583	7.54578	6.11842	8.5637	6.22261	5.25538	5.59183	6.62623	8.08926	6.45309	4.40135
GRIA4	0.00978692	0.0134356	0.0126974	0.00281293	0.0132447	0.00152526	0.0103658	0.00456725	0.0173713	0.0576835	0.0172022	0	0.00266631	0.00424368	0.0107383	0.00531426	0.015588	0.0130682	0.00214398	0.00477585	0.00359113	0.00429734	0.00379145	0.0205499	0.00506457	0.0134138	0.0578635	0.0184699	0.0109557	0.00552781	0.013935	0.00962572	0.0249316	0.00881274	0.00463952	0.0102781	0.00306867	0.0210972	0.0127876	0.0164963	0.00631854	0.00586744	0.00284686	0.0123098	0	0.00685292	0.0295982	0.0163748	0.00833172
MRTO4	8.11972	7.88488	6.83692	10.0003	6.81455	6.76858	7.55555	8.04516	6.41553	9.92385	6.57658	7.09995	10.0698	7.21743	8.31304	12.0098	7.46325	5.6031	11.7971	6.43316	6.73633	11.8587	6.0419	6.80401	6.55065	7.6684	8.07943	10.9438	11.0388	7.58433	6.36313	8.19693	7.90589	12.7841	12.5543	8.64232	6.92946	8.04415	6.38746	7.23504	7.65331	7.26414	10.4007	7.63834	6.74229	7.89656	5.97032	11.5727	6.80723
B4GALT1	40.5196	36.3555	37.7605	40.5158	54.7632	28.9823	38.3867	107.668	40.8102	45.0665	44.1145	45.2063	24.3611	26.6635	53.316	36.3584	30.4214	42.2709	84.6051	57.3417	39.4897	52.8371	34.7542	54.1581	29.6227	37.842	41.6719	24.5219	66.4522	52.8085	46.3864	46.5048	61.8332	39.5205	68.6034	51.1864	53.1262	49.9952	60.3986	31.3846	52.7904	63.7122	32.7638	55.5638	41.872	42.6628	51.2889	31.465	37.0249
REN	0.354626	0.561733	0.433542	1.21527	0.415313	0.435761	0.842697	1.22528	0.418162	0.562731	0.998904	0.658001	0.557383	1.07934	0.648498	0.740618	0.890688	0.728494	0.358552	0.499187	0.275261	0.449171	0.224567	1.07397	0.688175	0.163573	0.360763	0.235954	1.20238	0.674082	0.640874	0.536593	0.321398	0.568033	0.377173	0.381974	1.04777	0.168011	0.891065	0.373587	0.726477	0.96081	0.81334	0.428885	0.80882	0.668536	0.65624	1.39206	0.870858
WNT10A	1.64855	0.129039	0.772969	0.28263	0.234841	0.757239	0.418646	0.155215	0.340677	2.44615	0.245703	0.109194	0.370331	0.627037	0.317333	0.934417	1.07792	0.830297	0.190074	0.169361	0.307759	0.372513	0.442572	0.576917	0.097283	1.61533	0.971976	1.05524	0.679892	0.196027	0.123541	0.161191	0.467847	0.16928	0.233079	0.597346	0.199505	0.115785	0.415682	1.07248	1.16702	0.156053	0.151433	0.909433	0.392016	0.496161	0.270354	0.687139	0.246216
MICALL2	1.95287	1.486	2.67551	1.17711	2.25019	1.91131	1.68623	2.07006	1.86007	3.32149	1.2259	2.92582	2.45648	1.3742	1.93048	0.711985	1.45034	2.16059	2.39572	1.85693	3.1652	1.73131	1.65143	2.18693	2.15687	2.82571	1.4324	0.947692	2.38284	1.61986	1.58255	0.987793	1.73835	1.60022	2.0261	3.77755	1.88244	1.0069	2.33874	2.79321	1.94163	1.6023	1.38931	2.48435	1.27811	2.78955	1.60459	2.81931	2.04567
MIR7-3HG	0.017559	0.0301315	0	0	0	0.0410476	0	0	0.028333	0	0	0.368299	0.0239185	0	0	0	0	0	0	0	0	0.01285	0.0680236	0	0	0.0300826	0	0.055229	0	0	0	0.028783	0	0	0	0	0	0.0270365	0	0	0.0283407	0	0.0127691	0	0.0297499	0.0307375	0.0241377	0	0
ELF3	12.2189	20.6946	43.8171	15.2404	50.045	26.8446	13.2653	178.612	12.6947	25.6517	6.16678	33.89	9.30544	9.30636	34.4903	9.27339	8.94827	12.9183	38.7351	41.6726	16.9239	52.0832	23.2932	17.7689	7.86479	11.2051	9.30271	7.36796	26.4184	50.1718	39.2035	35.3889	21.19	9.99986	14.481	29.5632	24.9992	13.7471	54.4688	13.5025	20.6785	95.2703	25.0205	54.5428	26.5289	36.1008	38.5966	9.90963	13.6218
NEURL1	0.226763	0.245765	0.449039	0.142929	0.309571	0.260401	0.175567	0.17173	0.253564	0.222754	0.134023	0.725967	0.341407	0.405379	0.189151	0.189017	0.240782	0.192563	0.178659	0.135894	0.452526	0.206708	1.07113	0.368939	0.252191	0.333971	0.256874	0.218979	0.172569	0.185378	0.260565	0.260851	0.250828	0.201504	0.264029	0.229788	0.249477	0.189893	0.389852	0.301752	0.199053	0.155029	0.162011	0.0750571	0.128067	0.229816	0.196878	0.19303	0.231429
SH2D3C	15.5086	15.7017	21.7062	10.8362	26.5788	7.54929	26.5315	12.1776	33.3433	6.84739	23.6652	24.6835	11.1658	32.3191	6.73954	15.4978	17.1039	18.15	9.4795	20.2997	37.2741	12.5678	15.5411	20.5989	33.0247	19.2325	14.5265	6.26903	17.2967	17.3527	16.3155	14.8532	27.0944	18.3764	9.13046	14.2954	23.0782	15.2173	19.9923	20.1623	19.9991	25.7014	17.47	9.63509	11.3903	18.2126	24.3822	10.7803	10.891
CXCL13	0.0413759	0.662682	2.74665	0.079281	2.79971	0.52661	0.0486925	0.160907	0.511856	8.67759	0.181813	1.33072	0.770274	0.0747537	3.65706	3.03304	26.7338	0.18416	0.120854	6.39373	0.151821	1.34239	0.280508	17.6652	0.231956	1.89031	0.418443	1.67015	1.11933	0.408971	0.0589127	0.926928	8.99435	0.512289	0.871749	11.1528	0.129733	0	0.97311	0.842704	0.133564	0.062014	0.32095	19.3422	0.28041	1.6176	0.0947967	59.4662	0.176119
C7orf43	4.00183	3.89141	4.89298	2.09126	3.75407	4.09166	2.81499	2.63152	3.83526	3.63626	2.46009	5.49414	8.65588	4.39721	4.47955	1.45688	2.90687	3.50162	2.57686	3.13635	6.09608	6.89554	3.72897	4.12711	4.47122	4.47722	4.13675	1.01078	3.62282	4.13532	4.45478	2.26614	4.0044	2.66167	4.41694	6.15545	3.52665	3.4637	4.48408	5.53163	2.32918	2.29012	2.95868	5.89774	4.02705	5.09478	3.66745	7.02022	4.41336
NKX2-5	0.00942517	0.0161737	0.00611403	0	0	0.0073444	0	0	0.0228125	0	0.0138053	0	0	0	0	0	0	0	0	0	0	0.00689749	0	0	0	0	0.0146644	0	0.0131884	0.0133087	0.0134199	0	0.012005	0	0.0148934	0	0	0	0	0	0	0	0	0	0	0	0.0388694	0.0315391	0
TACC3	2.66355	2.31907	1.65722	1.49461	2.19406	1.52661	2.0227	1.68602	2.42213	1.59928	1.71377	3.11998	4.5837	2.74642	2.80305	1.2846	2.68216	2.3162	2.58631	1.74827	3.3558	2.84309	2.20486	2.54985	2.93739	2.82292	2.31904	1.16966	2.38599	1.38318	2.13515	2.32927	2.78996	2.13708	3.66426	3.5455	1.44564	2.35087	3.09702	2.55435	2.03973	1.39566	1.54782	2.69356	1.47525	2.25987	2.04479	3.65218	2.10194
P3H2	17.6729	21.1364	11.8594	18.9912	17.0298	17.5331	21.2083	29.192	21.2896	5.78509	27.0464	22.4747	10.7922	21.6121	25.2994	18.814	15.709	20.8463	27.7347	21.8394	25.1043	11.8588	20.2025	25.1073	21.7065	15.353	10.7188	15.8378	23.7291	28.3806	23.5991	16.2655	14.9396	11.6404	17.1736	15.3279	32.2	34.9596	15.4816	28.6519	20.2894	27.8866	15.6891	18.4832	25.7787	21.0253	22.8083	19.0293	21.2682
E2F2	0.278485	0.105507	0.206459	0.0831601	0.152953	0.107093	0.2043	0.0970485	0.224681	0.181191	0.148329	0.182064	0.517293	0.321486	0.24471	0.117831	0.351387	0.199207	0.475376	0.0705954	0.311864	0.190566	0.171636	0.322748	0.290095	0.316008	0.377018	0.085318	0.177127	0.168528	0.221433	0.278642	0.216513	0.195401	0.757239	0.455786	0.0907205	0.150358	0.236278	0.182883	0.186798	0.086731	0.0736429	0.22745	0.0919157	0.208927	0.129265	0.266253	0.174473
GRK6	11.5155	12.194	8.22847	8.23204	7.64326	7.97033	8.07188	8.01541	8.77145	7.98646	6.21976	7.9942	21.2112	9.77122	8.40337	6.13967	9.55675	10.1056	10.2405	6.13684	9.18746	20.5092	8.0672	8.9844	8.3019	9.58096	10.3544	7.07725	9.7086	8.44053	9.58866	7.27271	11.6947	10.9263	17.4446	13.81	6.12433	8.76432	10.2261	9.05184	7.82659	7.458	12.6684	12.3312	8.96056	9.37701	8.32302	13.4739	8.64843
GTF2H3	5.76383	6.46675	6.92042	6.86357	6.78426	5.98849	6.81794	5.26666	6.84584	6.80452	7.53091	6.6612	5.90032	5.83584	7.16228	7.21422	5.3178	6.72681	4.25213	6.74843	6.46985	6.26746	6.54374	6.65446	6.24908	6.4478	5.5021	5.19642	5.41827	5.84429	6.43462	4.92244	6.25003	6.12628	4.83099	6.02546	7.30173	4.8443	7.13736	6.5663	7.03104	5.50752	6.32859	6.20183	6.72795	7.60838	5.65565	5.82585	6.32098
LGALS8	7.62419	8.07456	9.13731	7.17394	8.57529	8.61614	7.86848	7.19942	8.24692	9.66775	8.39561	8.65454	7.74693	7.47155	7.58254	5.248	5.50675	7.5959	6.53429	9.4574	8.02871	5.79817	7.88995	8.57483	6.98149	10.809	8.60973	5.44695	7.02502	7.62293	7.73004	5.59747	6.19013	4.85475	5.81501	6.49983	8.46665	6.71939	8.3258	7.27597	8.00474	7.8567	4.94281	7.01767	7.58661	8.00924	7.44072	6.44785	7.48379
PCOLCE2	7.58259	8.3307	3.3221	12.5432	7.55035	14.049	12.1137	15.2579	8.15376	8.78283	4.91773	14.0725	25.2621	7.67251	17.7968	12.8185	15.5638	6.35166	6.29896	6.18541	8.76101	27.8989	9.60125	3.14577	3.21364	6.23789	21.7377	4.95013	17.2921	8.44863	6.07248	6.38674	7.44403	17.8994	11.2828	6.04534	2.87186	7.64965	5.46871	4.92305	8.44888	4.2926	18.7861	0.772774	9.23414	7.12821	16.871	16.6625	10.2034
P3H2-AS1	0.216288	0.695914	0.350761	0.971328	0.54882	0.589886	0.477253	0.883182	0.523501	0.0398371	0.594006	0.510372	0.294624	0.556843	1.08769	1.10104	0.559797	0.406129	0.414586	0.989484	0.496019	0.316567	0.445135	0.61499	1.11926	0.324233	0.420647	0.850375	0.340478	0.725344	0.500435	0.221589	0.27549	0.0912933	0.149526	0.236608	0.805323	0.790947	0.529878	0.797483	0.741827	0.891473	0.491523	0.850133	0.412261	0.473274	0.594648	0.542818	1.45769
CYFIP2	5.23529	6.76588	4.93261	4.60473	4.20566	4.86285	5.33358	5.25925	6.52154	6.14216	6.27229	5.48072	3.97601	6.28168	6.07435	3.93953	7.23041	6.63688	4.23284	4.28215	5.38248	2.91542	6.60215	8.10972	6.0153	6.74532	6.33326	3.06515	5.59795	5.34352	6.07066	3.60758	5.15622	3.2581	4.38242	6.65629	7.26605	4.82744	4.90794	5.91405	6.60158	4.53131	3.68645	6.50585	5.59317	6.0335	5.02518	6.91821	5.07556
ZNF354C	1.18907	1.35822	1.72013	1.1689	1.41913	1.44952	1.49376	0.770222	1.34189	1.58009	1.76303	1.88967	0.993696	1.34828	0.980491	0.876392	1.11541	1.83245	0.934863	1.05903	1.55919	0.419073	1.87932	1.83807	0.887121	2.19337	1.35348	0.659665	0.75536	1.05067	1.49569	0.490273	1.01511	0.648665	0.691632	1.11723	1.33807	0.999676	1.42496	2.07493	1.28338	0.820015	0.978758	0.986349	1.13708	1.15568	1.41897	1.08017	1.23687
ADAD2	0.0240043	0.0329533	0.034257	0.131086	0.0649702	0.0187049	0.0423735	0	0.0348597	0.0636658	0.0914151	0.151047	0.0130793	0.0260211	0.0263377	0.175962	0.015293	0.0240391	0.0525851	0.0234273	0.00880793	0.0386468	0.0278978	0.0504024	0	0.00822497	0.0522867	0.0377508	0.0134354	0.006779	0	0.0472178	0.103954	0.0108074	0.0265517	0.0336121	0	0.0517449	0.0188184	0.0202301	0.0697384	0.086346	0.0349124	0.0603841	0.016268	0.0588282	0.0263983	0.0240973	0.00681171
ALDH1A3	3.90828	1.97738	2.085	1.85252	3.71347	2.46195	1.9979	3.4427	2.62903	9.32087	2.8147	1.33399	2.36147	1.26024	3.53285	2.40904	3.62709	2.27144	3.66662	3.48731	2.07018	2.39221	2.6526	1.09489	1.29612	2.1382	13.0341	1.8122	6.09555	3.62116	3.21325	2.43257	7.9026	1.37014	6.07311	3.567	0.943465	3.04838	2.26958	2.0244	4.85661	2.62905	1.5367	1.80631	5.81068	3.38187	2.82965	2.03666	1.73684
KLHL21	8.16793	4.98128	9.2649	4.19215	7.2956	6.45609	6.11874	5.99919	7.03748	7.28187	5.32003	6.46057	5.90203	6.99096	6.0562	4.13078	6.04462	7.21745	11.3962	4.04024	6.99422	5.32652	8.55048	5.3545	5.54616	8.01592	8.14737	3.45874	5.69059	5.38308	5.6561	3.50195	6.4531	4.29744	8.07351	5.94685	5.39826	6.63177	6.33755	7.30912	5.79768	4.65507	7.09824	5.7974	7.53963	6.80867	5.40965	6.20138	6.30583
XIRP1	0.0579851	0.00523702	0.0257362	0.0350862	0.227155	0.0095124	0.0323236	1.32095	0.02216	0.0314779	0.0804622	0.0896174	0.0124715	0.013233	0.039066	0.0787143	0.0291648	0.0203752	6.76912	0.387205	0.0279955	0.0580682	0.02069	0.0854407	0.0355338	0.0365997	0.0332381	0.00479955	0.388605	0.3232	0.00434535	0.100053	0.559756	0.103053	0.704079	0.0373919	0.282286	0.0328936	0.159502	0.0192901	0.0246288	0.141797	0.00887736	0.121554	0.0051707	0.106847	0.15103	0	0.181865
AACS	1.68986	2.18224	1.51384	1.65306	1.70937	1.86339	1.95693	1.42785	1.31489	2.05993	1.58426	1.53303	2.09142	1.72549	2.11023	1.27683	2.07039	1.75208	1.178	1.30755	1.43092	1.54359	1.71264	1.47844	1.63726	2.11147	1.56551	2.02116	2.17583	1.69871	1.52607	1.4795	1.40188	1.37203	2.37476	1.74291	2.04751	1.89011	1.17769	1.77246	1.57355	1.46121	1.56687	1.48588	1.82632	1.4984	1.38233	2.36981	2.01661
SPATA12	0.318987	0.435102	0.13795	0.258591	0.0830167	0.280432	0.0866295	0.190848	0.0989836	0.180778	0.143763	0.154402	0.768764	0.0975299	0.269227	0.111031	0.273572	0.109214	0.0716708	0.0997822	0.0900358	0.634478	0.110901	0.143117	0.306862	0.196179	0.229064	0.154357	0.217453	0.138592	0.267854	0.187704	0.125015	0.340632	0.155094	0.286323	0.0641139	0.188908	0.0427475	0.155096	0.184819	0.0490355	0.273607	0.274335	0.235583	0.114543	0.168654	0.451598	0.359756
CLCN3	9.25708	9.53535	10.4622	9.09578	8.85732	8.70155	11.0227	7.91432	9.78756	9.91686	11.4452	10.8856	7.80089	9.09194	9.8015	6.99893	9.21411	10.5561	6.01719	11.4355	8.66119	6.25173	10.6715	10.9813	9.25388	10.777	9.22012	7.19893	7.65635	10.2238	10.7348	5.27319	8.67144	6.49239	6.51341	9.12633	10.6884	7.60567	9.67306	8.16509	10.6471	8.43394	6.69652	8.89805	8.42251	9.25503	10.5277	7.61407	9.49748
CHTF18	0.850702	0.543854	1.25517	0.306832	1.21334	0.701889	0.630126	0.731719	0.799388	1.30757	0.395803	1.74936	1.06793	1.09938	0.628366	0.326067	0.765147	0.946597	0.869678	0.512805	1.60359	0.476074	0.80452	0.753024	0.785499	1.09738	0.960251	0.314794	0.938291	0.749	0.608008	0.492171	0.849848	0.593293	0.854	1.50652	0.737446	0.498265	1.1246	1.56745	0.624607	0.520012	0.57012	0.804245	0.79132	0.858469	0.559493	1.35077	0.937218
MAN2B1	34.4706	30.5592	15.8236	21.1375	19.7499	24.3709	23.047	22.9701	24.0181	16.7538	23.4106	33.7707	44.609	25.4353	31.491	11.1525	32.9556	22.3247	19.6225	22.3391	22.3293	38.7933	24.3859	27.3111	26.8444	25.0922	30.4644	12.7412	23.7213	20.6187	28.9746	22.2503	37.9136	18.6556	56.8431	30.013	17.1174	26.7304	24.4822	22.1998	24.8129	23.6579	31.5866	38.5015	16.0661	25.0792	34.8298	42.7115	26.7106
MAGI2	1.10918	2.43711	1.76896	1.58836	1.87963	1.47557	1.5574	1.84864	1.52934	1.9716	2.34384	1.37866	1.20979	1.10482	1.26636	0.833843	1.2463	1.46929	0.891364	1.43668	1.08029	0.860388	1.98175	1.52321	1.33372	1.11268	1.42594	0.732204	0.916994	1.47781	1.89403	0.897867	1.54235	0.841116	1.04172	1.14362	1.80637	1.10243	1.12719	1.17466	1.71446	1.29007	1.74267	1.0047	1.62405	1.37662	1.42256	0.811707	2.57575
LAPTM5	197.05	266.194	108.108	189.01	121.717	168.931	175.304	194.432	150.322	75.3853	183.816	155.801	516.002	145.102	214.818	178.713	214.542	141.315	134.513	154.599	145.579	468.641	128.735	209.419	184.931	184.897	183.742	193.978	214.463	131.511	199.233	254.222	261.202	276.673	373.356	169.464	106.452	244.207	188.664	129.156	148.621	170.139	292.652	253.622	125.054	155.671	191.358	274.015	159.37
TXNDC15	13.1613	10.3694	11.4313	14.6204	12.2956	12.9869	12.2021	8.49309	11.9492	13.2232	11.448	12.0456	8.74191	12.7107	10.0837	16.5127	12.1858	11.7313	7.77663	12.4297	12.9776	9.96084	11.7665	13.1839	11.2365	12.8958	10.7723	13.2526	9.26322	9.51709	10.488	10.1081	10.4684	15.333	6.87117	10.4389	11.6948	10.401	12.186	11.0335	9.05128	9.62426	10.1953	11.245	12.588	11.0635	11.8623	12.5312	10.0789
ZBED2	10.4531	5.56891	4.62584	5.65783	5.24419	40.268	24.0907	6.60585	6.02889	10.2432	5.89174	4.13789	8.08511	2.28665	14.3835	8.1732	7.3044	20.6829	1.62764	10.8562	10.2471	2.39368	9.42084	6.69461	4.68456	14.0753	19.021	19.4613	21.1635	14.6276	7.21077	9.01546	6.67895	3.74891	1.39673	5.71013	7.04248	17.7127	3.93897	17.1838	12.8881	1.57439	8.01776	5.12017	20.2138	7.60945	4.15591	7.84455	16.746
PMEL	0.409803	0.295182	0.351166	0.33445	0.44504	0.370582	0.303651	0.383665	0.551045	0.611292	1.0597	1.09302	0.385934	0.405843	0.416332	0.336529	0.249802	0.287109	0.293704	0.283917	0.297027	0.34433	0.391994	3.22235	0.445077	0.320707	0.306994	0.334177	0.389365	0.314333	0.73477	0.539063	0.322206	0.353066	0.395731	0.380781	0.285539	0.334973	0.350354	0.362426	0.342965	0.272982	0.331126	3.82869	0.282872	0.460535	0.250374	0.29627	0.423525
TWSG1	10.5957	10.8973	13.6688	17.0049	12.5341	14.5677	13.9986	11.3597	14.2285	15.0684	18.6421	13.9172	10.0991	11.7561	11.5151	21.6087	15.6288	14.6027	13.653	18.9905	11.5935	11.242	15.2572	15.6513	12.0958	15.1186	11.8571	18.9801	12.5722	11.7443	12.5458	13.1961	13.5754	22.4351	10.1366	11.2865	12.1324	11.8062	10.4778	10.895	17.2239	14.08	12.757	9.45938	12.1541	12.1993	14.2842	8.86775	11.9273
RBM18	5.4728	6.46964	7.79557	6.75616	5.92124	7.53411	7.33286	4.08816	7.23947	6.24407	7.30918	6.9752	6.02609	6.87195	6.46351	8.72425	6.41044	6.76847	3.66331	7.20515	8.24177	6.61118	6.90158	6.49051	6.12144	6.70007	6.30347	6.46714	5.21699	5.6939	6.42873	7.03983	5.01511	7.43485	4.34802	5.26853	6.41111	6.53074	7.116	6.67027	6.75376	4.5684	6.34294	6.34978	6.96725	6.24051	6.2903	5.56398	6.39543
2020-03-02	20.8496	19.6696	21.232	21.3105	17.3863	17.1628	18.6932	14.3288	22.6201	14.055	15.8891	18.1018	27.4789	24.1461	18.0131	27.4689	23.0938	15.341	13.0623	12.7993	20.2943	36.4017	18.8127	16.7216	20.0946	22.369	22.5039	24.0914	18.033	16.3488	20.3151	41.4766	21.8941	39.1564	23.3127	18.9404	14.0465	20.7348	16.4662	17.639	19.6362	23.1466	34.5664	18.0167	17.3683	18.6309	18.1321	19.2525	17.4892
CHMP4B	93.4057	77.6326	86.3604	77.4721	85.2514	87.7061	77.5316	120.864	75.9784	100.088	75.0456	78.8451	93.9649	91.739	83.8259	68.2492	81.4134	71.2066	112.16	80.6287	82.3401	97.8919	86.2132	69.6555	82.3386	82.7861	89.1648	83.1972	91.5743	82.8604	81.3164	84.8111	85.9383	83.4874	106.729	91.9656	75.624	92.6441	69.0902	76.3956	75.9603	97.3323	86.0974	92.8759	91.114	88.9962	70.6621	89.2541	77.663
MRPL10	14.538	12.4982	11.6263	13.0116	10.0498	11.9684	11.3317	7.17266	11.8905	11.9628	12.2473	11.113	12.1972	13.3987	9.24483	19.3669	13.6816	11.5248	7.39101	8.24069	11.9475	11.4753	12.1852	9.67053	12.3046	12.6125	14.7204	15.1488	9.09228	9.10464	10.8176	14.2799	11.346	13.2854	10.3467	9.71104	11.8437	13.2595	9.535	12.7427	11.5595	10.1991	16.2374	10.6127	10.9729	11.3997	10.0415	12.5563	10.6277
HOMER3	6.45957	3.28583	3.51683	3.15787	2.80986	2.7145	2.84051	1.80331	3.96916	3.61177	2.16263	10.0649	2.35691	5.01414	1.55039	2.24701	3.66525	3.15746	3.63243	2.05453	4.98382	2.60841	2.92696	3.50184	4.34256	4.18956	3.83168	2.78459	2.00143	1.84052	2.84955	3.37513	4.04038	7.31618	3.37204	5.51183	2.04347	1.42088	4.14467	3.09868	5.08264	3.18974	3.11208	3.27648	2.697	3.20048	4.33681	2.97212	3.15053
DCAF6	11.9745	11.3645	13.0139	11.5367	12.8284	14.9597	11.8728	11.6297	11.8275	14.3699	11.754	11.5998	10.1552	12.2647	12.0476	10.2817	9.7056	12.438	9.61587	13.1345	12.1215	9.24411	12.6643	12.8859	12.8515	13.3514	12.5536	10.6858	11.1149	13.0725	11.5284	9.08074	9.51763	8.58151	9.45348	11.2684	13.4148	10.9152	11.9286	10.7288	11.7701	10.2965	8.78764	12.0262	13.3098	13.6476	11.9907	8.98061	11.266
NCOA6	5.72709	5.85103	6.33295	3.95209	5.55793	5.20468	7.24584	5.52735	6.5332	6.28859	6.7966	5.77198	5.10348	6.03913	4.87012	1.75227	4.72185	6.93694	4.43191	5.75384	7.02327	2.90528	6.77795	5.79859	6.28979	6.80753	5.05259	1.78184	4.6346	6.65478	6.85934	2.63618	5.87416	2.14543	5.2912	5.49936	6.45179	5.9544	5.63195	5.53644	6.83975	4.63469	2.4602	5.85788	6.11039	5.99354	6.23977	4.21259	5.66549
FGD2	2.54687	4.12063	1.7768	1.68218	1.52041	2.52462	2.39528	1.89334	2.12685	1.74195	1.93063	3.53015	7.2189	2.0012	2.88958	1.02508	2.29415	2.19675	2.26022	1.84719	2.61767	5.75632	2.61141	3.13514	3.21455	3.6683	2.70618	1.45928	3.28672	1.86119	2.02047	1.85196	3.05237	2.09758	5.51529	4.15883	1.93555	2.67215	2.90162	3.11249	2.10549	1.56821	3.08168	3.18631	1.51293	3.38456	2.6018	4.95954	3.50897
SPINK2	0.178956	0.614183	0.132671	0.220436	0.259481	0.179291	0.0451289	0.178957	0.226884	0.0376698	0.224676	0.0536228	0	0.166279	0.280503	0.208227	0.28503	0.0853408	0.0840067	0.18713	0.0938067	0.112254	0.272359	0.1342	0.0661478	0.525589	0.198881	1.72884	0.0715455	0.108297	0.109202	0.293348	0.244221	0.230204	0.0807949	0.492219	0.400795	0.118092	0.534454	0.161592	0.0412629	0.0766339	0.130139	0.267961	0.0433147	0.17901	0	0.342191	0.217639
C11orf72	0.0162172	0.0139145	0.0368198	0.0116527	0.0411502	0.0189554	0	0	0.0196259	0.0119479	0	0	0.0220908	0	0	0.033022	0.0129149	0	0	0.0197843	0.0446295	0.005934	0.0314127	0.0283764	0.0209803	0.0555676	0.00630798	0	0.0113462	0	0.034636	0.0265835	0.00516403	0	0.025626	0	0.0508486	0.0249704	0.0105947	0.0512528	0.0130875	0	0.0294833	0.033996	0.0549531	0.0283886	0.0222932	0.0542669	0
MYL4	0.301594	0.269121	0.313026	0.41608	0.122445	0.498225	0.212955	0.182968	0.126529	0.12443	0.159031	0.404859	0.131464	0.39232	0.375033	0.50767	0.345859	0.201354	0.700329	0.206042	0.243462	0.476737	0.221991	0.316632	0.187284	0.268684	0.534937	0.284584	0.32073	0.323656	0.240476	0.533928	0.268902	0.760406	0.20016	0.50677	0.283692	0.167177	0.425587	0.127088	0.292068	0.48819	0.166685	0.177024	0.224834	0.0633539	0.215587	0.14129	0.410801
IKZF3	1.84978	2.72079	1.50057	1.1251	1.10755	0.94199	1.1453	1.2309	2.5934	2.21712	2.08262	1.44773	0.956321	1.71019	2.33325	0.575564	2.35572	3.2224	1.49259	1.87173	3.12599	0.611909	1.75523	5.59694	1.40575	4.88543	1.85324	0.843577	2.15237	1.06651	1.51064	1.03121	3.38094	0.572681	1.45682	3.36543	1.49637	0.995963	2.453	2.9999	1.27636	0.650255	0.377168	3.01369	0.935542	2.3509	0.631643	4.22666	1.65645
RAB6B	2.40582	1.29718	2.47954	1.01076	1.71242	1.85421	1.07332	0.690199	1.34173	3.0994	1.56938	1.66828	1.15059	1.73864	0.883503	1.14217	1.92639	0.95451	1.06559	0.665588	1.06729	1.09678	2.27911	1.43772	1.20331	1.30634	1.45227	1.07511	1.49005	2.03735	1.02952	1.39537	1.90894	1.34657	1.08024	1.4957	1.16449	0.683184	1.00487	1.05256	4.18544	3.26102	1.06837	0.764766	2.08819	1.73176	1.17921	0.604888	1.17048
CHPT1	7.59999	10.8305	10.1885	8.93777	9.79243	12.0646	8.80852	10.6193	11.1945	4.16067	12.0997	7.94979	6.24647	11.613	12.9181	15.3861	7.65974	11.5383	9.04459	10.0256	10.8797	10.9095	8.7614	10.4511	10.6359	10.5539	10.5307	13.834	8.95101	8.4478	9.45916	13.859	9.473	9.29436	7.6201	6.61668	15.8727	11.3934	7.49914	10.8321	8.42532	9.02595	12.8871	8.25533	11.2837	10.4383	10.0498	7.32037	10.7739
ABHD14B	25.9051	24.0964	23.1228	24.8903	20.427	20.9353	19.2548	18.6552	23.2626	21.0679	21.0159	20.168	23.4569	24.8599	19.6385	21.1724	23.7973	17.5077	16.5843	12.0501	20.0349	22.7822	21.9265	19.0533	22.8432	18.9656	22.5374	21.514	19.7012	17.3594	21.7717	20.3365	21.3848	20.7951	13.7139	21.3542	22.2688	23.3037	16.8544	23.6922	22.3216	23.002	30.1125	19.044	21.9717	21.1819	20.2558	23.233	19.8705
FMOD	61.6476	14.9796	24.0236	30.4964	24.349	17.3213	30.5556	20.7928	24.895	28.1937	39.3188	32.6422	8.55267	28.6273	12.8446	30.4909	24.73	33.1605	28.1161	18.5782	23.0931	13.8761	35.3187	25.8118	24.1908	21.3399	45.9356	14.5254	11.9227	13.6985	35.7677	23.9464	32.7902	36.0737	19.3716	13.7971	22.6685	22.8698	26.1614	26.1559	31.547	19.7324	19.9417	11.912	14.8808	18.3809	43.0487	22.7259	19.1537
CELA2A	0.0259859	0.0222961	0.0337137	0.074688	0.0219793	0.0404981	0	0.0757926	0.031448	0	0.0190311	0	0.0176988	0	0	0.229292	0	0.0216864	0.0284631	0.0634034	0	0.00950846	0.0251674	0.0682042	0.0168091	0	0.0303232	0.0204336	0	0.0366932	0.0554997	0.0425965	0.0165494	0.0292491	0.0102656	0.0454836	0.0203696	0.0200059	0.0169766	0.0547506	0.020971	0.0389476	0.0283459	0.0272371	0.0660413	0.0227446	0.017861	0.0217389	0.0184351
LCP1	90.1373	94.2891	43.1085	79.2712	49.3377	67.6641	108.972	84.3051	78.8764	38.907	67.7839	73.8943	197.041	71.7082	93.2628	65.9447	112.77	78.0157	69.3467	69.9345	66.4733	123.381	80.9794	123.131	75.02	108.921	103.613	82.0829	96.5407	60.7589	88.6683	85.4795	115.542	92.2694	142.322	70.3251	41.5975	88.9214	94.3195	67.7111	70.1237	53.299	85.0315	107.884	56.5112	87.277	75.9406	108.988	76.7549
FOXD3-AS1	0	0	0.0211966	0	0	0	0	0.0190611	0	0	0	0	0	0	0.029877	0.0221787	0	0	0.0357909	0	0	0.0119564	0.0316467	0	0	0	0	0	0	0.0230699	0	0	0.02081	0.0183897	0	0.0285967	0	0	0.0213472	0	0	0	0.0237624	0	0	0	0.0224593	0	0
LRP6	5.43765	7.00159	5.45329	4.56845	4.96422	4.14346	7.19573	5.14556	6.4127	4.6729	6.874	5.47045	4.05464	5.67926	4.3015	2.97284	4.30909	6.68902	3.01774	6.54985	5.12123	2.11823	5.71571	5.46224	6.46662	7.458	5.03074	2.94863	3.21931	5.27875	8.58781	2.45684	5.49244	3.07099	3.14674	6.01869	6.39661	5.02417	5.39348	4.85947	5.67947	4.49276	2.62974	4.65883	4.47384	4.95658	5.42511	3.82699	8.51438
C6orf47	13.9948	9.05878	13.377	8.09056	13.2332	11.9926	11.0219	11.3594	12.1659	11.4209	9.61273	11.2064	10.6017	13.7357	10.9368	7.28522	12.0913	12.3647	12.9968	11.3626	14.8202	12.1674	11.4997	11.1067	11.6781	12.8011	11.8487	7.7001	13.3564	12.8476	11.2065	8.70565	11.2946	9.39749	13.0859	12.1012	10.2138	12.5117	8.51245	13.5418	11.4034	13.0514	11.192	12.086	14.3078	11.8234	10.096	14.5027	11.2125
DAB2IP	21.1165	11.9834	18.3971	10.717	20.8467	23.7053	21.2982	18.8303	22.0174	15.0663	18.2018	16.4642	7.93616	17.2367	12.9891	5.23856	14.7229	21.756	16.9795	10.4236	23.2941	6.72523	18.5645	14.6918	17.0969	21.2175	17.7531	5.49674	18.0059	15.7638	17.1957	7.48007	18.9107	7.93684	15.445	15.4934	16.4054	17.0342	14.2616	19.837	20.6519	19.188	10.2625	13.7927	22.4862	17.406	19.1703	10.7178	15.1871
ZSCAN29	3.02857	2.88443	3.25377	2.29587	3.08501	3.11571	3.0197	2.05129	3.74437	3.04225	3.8434	4.50535	2.59767	3.12823	3.31318	1.15099	2.20337	3.46597	2.9458	2.87448	3.50959	1.63723	3.53249	3.53461	2.67108	3.88384	2.95547	1.12757	2.66841	3.29347	3.45231	1.18016	2.79085	1.24234	2.31292	3.63986	2.95701	2.45989	3.09418	3.4475	3.04912	2.27407	1.5577	2.76278	2.65132	3.1768	2.8464	2.72773	3.50353
EGF	0.1063	0.447738	0.108657	0.254603	0.168922	0.243476	0.130783	0.304405	0.241693	0.251559	0.523718	0.202694	0.522156	0.230462	0.624398	0.0918278	0.338615	0.177423	0.243451	0.479427	0.218663	0.365386	0.246459	0.597455	0.516745	0.143485	0.19546	0.146911	0.76625	0.350232	0.48158	0.306254	0.252329	0.319062	0.549727	0.597642	0.863551	0.376949	0.286199	0.244327	0.202765	0.183461	0.264702	0.303867	0.251051	0.157887	0.132842	0.52817	0.717555
SYNE4	2.45923	2.92056	2.82086	1.62682	3.02434	4.33148	1.80537	1.72147	2.17936	3.93423	1.46371	3.35694	2.73311	2.95359	3.26935	1.69569	2.17606	2.58008	1.6162	1.82867	3.35166	2.63957	2.83544	2.60918	3.44413	2.59482	1.96172	2.11181	2.6109	2.73393	2.47888	2.11159	1.68551	1.93324	2.06637	4.64606	3.30466	2.13973	1.81573	4.1616	1.90273	2.29344	2.55483	3.73144	4.06082	2.91097	1.70641	4.48036	4.28684
THRB	2.12343	2.68329	3.15328	2.03545	2.79851	2.38396	2.77228	3.23614	2.82664	1.87663	3.81394	2.02968	1.12366	2.9037	2.39946	2.19651	2.31005	3.10919	2.0528	2.96372	2.71082	1.15593	3.96164	3.0533	2.5448	2.18586	2.46991	1.90673	2.14679	3.28956	2.42325	1.58993	2.57187	1.78809	1.35182	1.83255	3.4853	1.79354	2.61161	2.61177	2.31533	2.35382	1.89191	2.00476	2.63395	2.4437	2.72585	1.39532	2.65592
HOXB9	0.0229403	0.013122	0.00496039	0.0549453	0	0	0	0	0.0185081	0.0112674	0	0.0160391	0.0208326	0	0.0139835	0.290652	0	0.0127631	0.502543	0.0186574	0	0.0167881	0	0.0669005	0.00989269	0.0393021	0.0178461	0.192413	0.0106999	0.118773	0	0.0250694	0.0292195	0.025821	0.00604162	0	0	0.0117741	0.00999125	0	0.0370263	0.0458438	0.0111216	0.0160299	0	0.0133859	0	0	0.0433986
PSMC5	19.5737	20.2528	21.6763	19.6771	21.586	20.3697	19.2354	17.5437	20.9377	23.8154	18.2592	23.0679	22.723	23.5816	19.6614	17.537	21.1642	18.525	17.429	18.0929	23.1772	18.5769	20.1406	19.4283	23.156	21.2517	20.7907	20.2685	21.552	18.701	18.0249	19.051	17.4234	19.2956	19.6915	22.2195	23.1406	20.5955	17.7583	22.8475	18.5454	19.8303	18.4025	19.7559	21.2177	21.0756	17.8677	23.8578	17.0575
USP10	10.0293	10.3676	12.3922	9.92669	9.65537	9.27954	10.0207	13.0508	9.71742	12.4552	10.6807	9.44724	10.1392	10.0343	10.4589	7.46356	9.9629	10.5571	14.0858	10.3832	9.21085	10.272	11.5335	10.7957	9.60942	11.7677	10.3666	7.35818	9.82309	11.6068	10.576	8.96158	11.4614	8.18138	12.7005	9.43985	11.1822	10.3668	8.49265	9.90696	10.7792	9.30543	8.65722	10.4918	10.2494	12.5676	9.47417	9.77064	9.42613
ASTN1	0.137281	0.0257662	0.0166975	0.0708992	0.043543	0.0952736	0.242335	0.0600608	0.0121141	0.894463	0.0816884	0.0584892	0.0438286	0.0418543	0.0470706	0.0436776	0.181072	0.307899	0.108077	0.0785048	0	0.0109883	0.0623235	0.0487928	0.0111001	0.106572	0.528975	0.0303606	0.0870428	0.0272597	0.0244333	0.0175807	0.150268	0.0169007	0.113548	0.161442	0.0470796	0.033028	0.0560535	0.0271164	0.0415454	0.00964483	0.0249581	0.0449659	0.0508798	0.090118	0.073717	0.165089	0.0608693
MLC1	1.07477	0.583248	0.455859	0.561051	0.567191	0.479592	0.802678	0.568009	1.56749	0.703848	0.706393	1.05973	0.425446	1.34929	0.344367	0.604796	1.98982	0.636293	0.815004	0.481885	0.876373	0.326043	1.27668	0.835825	0.522901	1.18821	2.19389	0.8668	0.475594	0.577215	1.43221	1.44557	0.637677	0.584189	0.765699	0.836086	0.482446	0.579916	0.672141	1.45158	0.971142	0.578259	1.22582	0.259966	0.653682	0.900509	0.359892	0.315075	0.449663
ATP2B4	25.5977	24.1579	24.5598	19.1254	30.2475	24.9364	39.685	38.3013	33.4598	31.6	33.1787	32.9522	15.2081	27.2818	35.9986	19.3587	26.4646	39.7359	44.9789	34.2399	33.0731	10.1539	36.9039	34.3813	27.4321	36.0634	30.0328	15.8211	31.1308	37.825	29.7751	17.6753	34.5515	15.6355	25.2003	24.7794	26.7335	30.9392	27.7664	31.8557	35.1974	28.896	13.5847	21.6123	30.835	36.5321	29.6259	21.5161	36.6392
DCT	0.0287816	0.0224498	0.123903	0	0.053114	0.0509717	0.0230939	0.0579995	0.0506636	0.111806	0.00766493	0.049393	0.0106925	0.0482178	0.0526323	0.00710377	0.0291719	0.0829762	0.0114637	0.0319202	0.0144012	0.0229776	0.101363	0.0503612	0.02031	0.0762056	0.0488515	0	0.0366122	0.0812815	0.0111765	0.0171561	0.0266615	0.0117803	0.00413454	0.0137392	0.04102	0.0201439	0.0376059	0.0496152	0.038008	0.0274513	0.0190275	0.0219399	0.0443311	0.0320619	0.0431618	0.00875551	0.0259871
ZNF341-AS1	0.0280744	0.0481761	0.145693	0.161381	0.0474916	0.175012	0.0991166	0.229275	0.181202	0.124101	0.0411213	0.412202	0.0764849	0.243465	0.0513391	0.0381107	0.0894304	0.187434	0.184504	0.205497	0.154521	0.123272	0.0815702	0.196495	0.0726402	0.048098	0.0655205	0.0441517	0.0785678	0.198211	0.319788	0.2301	0.0715178	0.221199	0.133087	0.294835	0.13204	0.0432276	0.256774	0.177453	0.271877	0.168311	0.142912	0.235409	0.23783	0.19658	0.0385929	0.234861	0.278834
2020-03-02	15.4349	17.2273	17.6685	17.7145	15.1827	27.3592	17.3191	17.3248	19.8656	13.5607	19.224	15.9243	10.7041	18.6018	20.7209	18.5284	14.7793	19.3565	13.0772	18.6352	16.1318	11.1064	16.0307	19.1885	20.7843	19.6081	16.2168	22.039	16.8656	17.4808	16.6314	18.6738	14.4568	14.807	10.2315	15.3237	24.3051	19.7874	13.4448	21.6962	16.3138	19.7394	13.8274	12.7768	24.2712	16.1237	13.4766	16.3009	19.3983
SLC25A18	0.145701	0.307175	0.253841	0.227333	0.514073	0.282216	0.220457	0.189413	0.282123	0.0920094	0.36585	0.270682	0.255178	0.239171	0.220766	0.254299	0.232064	0.229292	0.287263	0.264085	0.412425	0.228486	0.169334	0.305933	0.177724	0.292413	0.262317	0.0720155	0.297078	0.25864	0.124473	0.225188	0.323444	0.131198	0.164453	0.131155	0.482949	0.423049	0.157738	0.245587	0.181414	0.318206	0.278512	0.20944	0.275072	0.196756	0.148787	0.167162	0.15357
FAM57A	7.18862	5.08017	5.43417	5.2378	5.49538	4.70917	4.93347	9.74815	4.92804	8.25734	4.33624	5.54476	3.99342	5.37986	6.48064	6.69796	4.56607	4.46034	9.51495	4.88579	4.84994	6.12525	4.63913	4.03317	5.44208	4.76342	5.05997	5.56204	5.98695	7.36378	5.02542	6.24607	7.3076	6.18607	8.6902	7.33762	5.19454	5.44562	4.23516	3.93066	6.8244	5.44112	4.75622	4.12221	5.28433	5.54801	4.54491	6.29094	6.02983
AP002884.2	0	0	0.0215535	0.0477488	0.0562063	0	0	0.077528	0	0	0.0486671	0.0696916	0	0	0	0	0	0	0	0	0	0	0	0.116276	0	0.113848	0	0	0	0	0	0	0.0211604	0	0	0.116312	0	0	0	0	0	0	0	0.0696518	0	0	0	0.0555916	0.0942859
NIPAL1	0.191326	0.209445	0.252503	0.834339	0.898418	0.254477	0.186339	0.923649	0.444454	0.558972	0.36238	0.477416	0.287582	0.246736	1.36934	0.765738	0.210161	0.335858	2.11733	0.346091	0.369175	0.352454	0.201274	0.144301	0.256056	0.64427	0.333607	0.181573	0.646217	1.22038	0.493171	0.167627	0.426468	0.349019	0.959113	0.39262	0.191347	0.157456	0.318948	0.291909	0.431264	0.380697	0.29746	0.636191	0.368873	0.433089	0.417188	0.292518	0.257423
GDF5	0.566878	0.217594	1.42737	0.343012	0.264973	1.11014	0.658342	0.252361	1.05914	0.296746	0.557189	0.563222	0.193048	0.711533	0.30008	0.708779	0.392044	0.273891	0.351308	0.163792	0.191584	0.0764198	0.310631	0.208823	1.00357	0.370587	0.33655	0.797668	0.208742	0.105323	1.03017	0.391257	0.465528	1.25094	0.0707184	0.14361	0.432665	0.137819	0.136441	0.455748	0.541751	0.324203	0.130181	0.28145	0.454952	0.300312	0.369127	0.399352	0.444491
JDP2	7.87869	7.27872	10.0677	11.9956	23.5875	8.2754	9.14711	25.0237	8.00627	6.6651	6.60231	17.3754	4.38516	8.00879	13.4062	6.83654	6.43316	11.0633	16.3234	23.9037	12.9041	13.7484	8.29884	17.3861	8.27213	7.23438	7.18801	4.02233	15.2854	20.8242	17.7036	8.8832	11.9625	11.0806	9.62865	21.8017	18.3018	7.88604	22.185	7.96981	7.19354	28.5369	12.4119	16.9739	10.0665	14.5843	20.6951	5.66157	6.23385
HHLA3	2.97175	3.57524	3.50976	2.62274	3.03266	2.88202	3.39272	2.4684	3.21851	5.59252	2.48394	3.01499	4.29007	3.39651	4.22346	2.6748	2.88109	2.88441	2.0344	2.56143	2.07419	3.07305	3.91052	3.8434	3.17596	3.26507	3.90751	2.46379	2.37295	3.32962	2.87452	2.70042	3.12688	4.39931	2.2331	3.42056	2.83587	3.28261	1.96254	2.89244	2.68499	1.98496	3.78191	3.45341	3.28369	3.3927	3.08608	3.43185	2.86446
SCGB3A2	160.773	511.734	243.467	38.3887	948.178	913.094	194.096	510.766	280.485	2605.61	449.329	157.231	1077.53	502.443	600.896	307.122	565.592	217.813	89.2661	301.92	202.907	577.183	269.881	150.89	563.532	758.918	1033.42	798.026	242.05	493.389	607.329	515.406	128.078	92.0206	692.797	449.918	183.288	659.541	119.246	258.511	271.137	64.4997	1124.82	300.08	571.261	266.332	36.0146	235.358	714.452
PSORS1C2	0.08581	0	0	0	0.31935	0.0936123	0.0302952	0.0400449	0	0.0505759	0.0502753	0.287978	0	0.0930196	0.282454	0.0465945	0.136673	0.143224	0	0	0.503783	0.0376783	0.11635	0.300296	0.0444053	0.294025	0.013351	0	0.456274	0.169634	0.0488719	0.0281322	0.131157	0	0	0	0.0807166	0	0.403629	0.470069	0	0	0.0374412	0.287813	0.0581547	0	0.047184	0	0.0730511
TM4SF18	8.55152	1.22414	1.6939	19.187	1.66113	1.43086	2.75171	3.21601	1.90069	4.64571	2.60574	7.68455	0.311912	2.60152	1.19177	5.84017	2.6371	3.99091	2.59972	1.81575	1.16335	0.586499	1.82958	2.00331	1.35584	1.90113	4.91234	4.68835	2.10113	1.84049	1.42325	1.28484	2.38653	5.48677	1.14463	2.11955	2.22982	1.83744	3.19322	2.69984	9.40296	1.57077	1.09197	2.18774	0.544632	1.45688	5.76273	2.09239	1.54947
CYP2J2	1.39936	1.2573	6.80816	0.75887	2.82502	2.56662	0.827292	1.04733	1.43788	5.398	1.07318	1.52296	1.55552	2.09652	0.808737	1.16486	0.988251	0.396621	0.694081	0.306001	0.73872	1.93222	3.50967	0.889338	0.614842	2.75931	1.51482	2.20074	0.665014	1.57517	0.563907	0.865607	1.25693	0.653811	0.511088	0.982043	2.00757	0.487851	0.77621	1.19603	3.0683	0.821136	1.25284	1.35604	3.16496	2.79627	1.0072	0.78412	0.590028
HOXB7	2.41537	1.5737	1.68413	2.41306	1.22359	1.99285	1.50485	0.919224	1.88619	1.40838	1.62704	1.59844	1.10846	1.87622	1.6534	3.06844	1.97496	1.35819	0.848863	1.03999	1.87208	1.38006	2.17666	0.994436	1.42036	1.57115	2.04983	2.53916	1.60856	1.62323	1.30576	1.43975	1.72745	4.87037	0.693948	1.35647	1.07323	1.05407	1.60328	2.01384	1.85542	1.51001	1.89738	0.866453	0.74406	1.80885	1.17188	1.44793	1.53943
SFXN2	1.42728	2.32277	1.28601	1.51452	0.885155	1.23853	0.888984	1.39863	1.03063	1.49858	1.58682	1.38608	1.54601	1.0652	1.86432	0.770341	1.31859	0.725748	0.920246	1.22875	0.978023	2.32093	1.02782	1.31104	0.664228	1.5909	1.10652	1.1088	1.05186	1.39446	1.19625	1.3329	1.15148	0.95672	1.97004	1.43614	1.72153	0.801901	1.46366	1.38714	1.01901	1.16349	1.60067	1.26684	1.26946	1.2901	1.35418	2.84015	1.42908
TMED1	9.18331	7.36451	8.39415	9.523	7.01714	7.83697	6.00998	5.12868	6.88285	8.89924	6.41982	8.61864	6.89436	7.43788	6.51219	11.634	8.22748	6.68411	7.61549	6.04721	5.93518	10.7394	7.61805	5.88882	7.07095	6.59273	8.64593	11.16	6.79006	6.7599	6.64923	9.45116	7.80075	13.6401	7.48236	6.94093	7.28032	6.0055	6.39146	7.75045	7.6216	6.90151	11.7722	6.7269	8.99514	8.81421	6.68856	9.53758	6.25578
CDH17	0.0303558	0.0260455	0.246144	0.0145413	0.179728	0.043366	0.0714473	0.100343	0.0775545	0.164005	0.0741048	0.074283	0.110267	0.0548437	0.240548	0.0412077	0.104756	0.0506663	0.0498743	0	0.0278462	0.0740495	0.146998	0.0708209	0.163631	0.0520065	0.38571	0.167088	0.21946	0.0500075	0.0432218	0.232212	0.0644412	0.0398623	0.0639566	0.0265661	0.134838	0.0467404	0.0528837	0.053298	0.130653	0.0909942	0.0699044	0.0212116	0.0428594	0.0885644	0.0347742	0.0846486	0.0430704
SOX9	3.36044	2.85746	6.44856	3.74086	7.67849	3.15009	5.51588	8.40281	5.80679	6.51092	2.61534	2.69316	1.00432	2.03887	5.08123	3.03664	4.04218	6.98177	3.18635	3.5489	4.61014	3.27407	4.82845	1.91319	0.765667	3.29966	5.93856	1.15951	5.16539	7.57796	2.94225	0.994816	3.49448	1.14602	1.77927	2.29128	3.13738	1.74534	3.70919	3.26535	6.28194	2.6912	3.61821	2.58648	3.20368	4.5919	4.3299	1.89653	2.41957
CCPG1	3.23774	3.67575	3.5437	3.84624	3.64631	3.96989	3.84067	2.83435	3.69729	2.90149	4.13727	3.38145	3.90268	3.50003	3.86371	4.13003	3.70852	3.45156	2.51838	5.5715	3.65389	4.4776	3.95775	4.73419	3.84303	3.92368	3.16854	5.1943	3.31147	3.49703	3.82997	4.3909	3.52768	4.56678	3.2677	3.31693	4.10792	3.39154	4.36244	2.93778	3.73634	3.46286	3.67057	3.53955	3.14227	3.82436	3.57423	3.37352	3.70187
FBXL2	1.24382	1.3434	2.22512	1.18425	1.3548	1.51905	1.06828	1.05755	1.23621	2.50058	1.20703	1.32876	1.0664	1.56886	1.28561	1.35288	1.11974	0.975696	1.01545	1.18125	1.10556	0.753828	1.92543	1.16706	1.12273	1.76035	1.28815	1.25548	1.07021	1.85087	1.12933	0.899137	0.964342	0.881168	0.624632	1.26658	1.47359	0.939744	0.895022	1.45411	1.44228	1.04212	0.867066	0.744976	1.98086	1.89334	1.23547	0.870345	1.42499
KRT10	5.67744	5.26195	7.38993	6.78357	8.45667	9.64456	4.77321	6.14672	6.39475	7.53042	4.45057	6.54865	5.06298	8.63234	8.75097	10.4947	6.46751	6.34327	5.99474	3.44611	8.06358	10.0165	6.83051	7.96689	6.39528	7.03639	7.68404	6.35679	8.59442	6.17987	5.398	7.55491	5.87039	11.8081	5.52083	7.22123	5.68132	6.18082	6.34973	7.14587	5.75908	6.6849	7.7979	7.81103	7.08452	6.84799	6.91044	9.29699	7.75222
TRIM55	0.0512465	0.142902	0.914187	0.0368228	0.433451	0.219631	0.0339235	0.209258	0.1137	1.4819	0.159507	0.255287	0.479924	0.20832	0.257712	0.139133	0.316286	0.0320755	0.0631482	0.0156296	0.129277	0.164076	0.763096	0.112087	0.0165745	0.153645	0.3289	0.181336	0.116526	1.01307	0.0547251	0.0840041	0.10199	0.0576818	0.0253058	0.145759	0.321364	0.00986336	0.0669586	0.323919	0.155087	0.019202	0.37267	0.026857	0.618637	0.885871	0.0792526	0.235791	0.0454445
GOT2	17.3832	15.1713	16.9638	15.9663	15.6383	15.3669	16.4206	12.9069	15.141	19.668	17.1715	14.9275	18.732	17.0543	14.2986	17.1451	19.8325	14.4065	11.4805	14.0271	13.5953	16.058	15.0948	14.8278	16.5565	16.4844	16.6012	16.0303	15.0916	16.835	14.4536	17.5591	18.0996	16.2275	16.9929	13.1997	15.7007	16.9052	12.6746	14.1996	17.2724	16.2906	15.9112	13.0953	16.9414	14.6691	13.4862	15.3357	13.0125
SPAG8	0.485794	1.16957	8.48031	0.385534	4.46462	2.46338	0.883146	2.01328	1.01202	10.9722	0.626594	1.94665	2.00498	1.39905	1.31266	0.816945	0.612066	0.484079	0.484453	0.371511	1.55639	2.37185	4.87346	0.647038	0.38459	2.32293	1.80498	2.02972	1.08559	3.16361	0.516189	0.772551	1.63465	0.48967	0.17186	1.04066	1.77327	0.334927	0.653685	2.38316	1.94266	0.369487	1.4711	0.547183	3.78369	5.78778	0.299017	0.982635	0.617258
PTK2	7.52714	7.51194	9.43205	8.19594	9.084	6.91626	8.64522	8.40805	9.46676	8.04799	9.59893	8.40167	4.45466	9.02829	6.44508	7.21754	6.77785	8.08317	6.75337	9.19505	8.42918	4.62456	8.79367	8.02661	7.54546	7.46531	7.79525	5.42081	6.2279	8.70408	8.31057	6.50243	7.54869	6.78307	4.9406	7.52133	9.77416	7.15166	7.96216	7.3138	9.17956	8.88583	5.91039	5.70228	7.02018	8.73404	9.07585	5.0462	7.52953
SFTPB	3358.7	3660.09	1527.49	4515.9	3285.01	4203.6	3028.36	4432.17	2840.2	4085.98	3510	2884.45	3078.67	2885.55	5411.43	2400.64	4839.3	3571.95	2587.35	2931.72	3439.07	3786.28	3087.83	2887.84	3885.34	2980.64	2447.14	3092.82	3814.44	4346.29	3629.25	3477.22	3073.21	2371.15	5294.07	4112.66	4297.32	6276.63	2552.9	4613.82	3080.27	3552.66	4999.67	4143.52	4853.97	2925.75	2952.02	6208.92	5152.13
APH1B	4.21022	6.0782	6.66238	6.63381	5.14107	5.3522	4.57847	3.35287	6.0661	5.50498	7.30863	5.98272	5.83296	4.83655	6.23421	6.64676	4.84052	4.11919	4.11972	4.98728	4.92985	6.96141	7.03838	5.73263	3.38798	5.87756	5.58365	5.05636	5.16742	5.0776	4.72618	5.10543	6.60034	4.89662	5.92913	4.75353	5.66001	4.13742	4.76884	4.96514	6.16921	4.61424	5.26658	4.78947	4.97871	5.74768	5.25925	4.52587	5.54554
FKBP9P1	0.639232	0.313409	0.932996	1.05807	0.656532	0.115633	1.0478	0.339594	1.19263	0.370032	1.1035	1.40064	0.217688	0.556826	0.35486	0.185947	0.454523	0.857357	0.168791	0.236736	0.628272	0.392619	0.569348	0.69907	0.516863	0.557355	0.452883	0.314157	0.351396	0.499666	0.780142	0.682967	0.378023	0.719505	0.036075	0.819166	0.232642	0.0966684	0.872506	0.541133	0.589565	0.650125	0.311288	0.143574	0.232081	0.849237	0.886577	0.496562	0.0647841
CDIPT	38.1608	26.2997	29.3713	27.3136	26.3176	30.6335	28.9613	20.9968	30.9221	27.5418	25.048	30.9262	28.8331	38.3686	25.3237	27.5976	33.3634	25.6697	20.8765	18.5233	31.1891	28.6087	29.7498	26.4536	31.2233	29.3384	32.0695	28.6956	27.2843	23.2251	28.3718	28.9855	27.9283	31.8823	27.7117	28.9553	26.6142	32.3083	20.343	32.0534	28.3293	30.1145	35.0675	26.989	34.6357	25.9143	25.8498	27.5195	25.9396
GSG1	0.0525426	0.0112705	0.0383444	0.0566312	0.0222207	0.0102357	0.0115938	0.015325	0.0158967	0.0193552	0.0288602	0.027552	0.0447329	0.0355982	0	0.035663	0	0.0219245	0.0575513	0.0640997	0.0481989	0.0576773	0.0318047	0.0689532	0.0339874	0	0.0306562	0.020658	0.0275706	0.0278221	0.0280546	0.0430643	0.0418278	0.133066	0.0103783	0.0229916	0	0.0101128	0.0429075	0.0553518	0.0106006	0.0590629	0.047762	0.0275362	0.0445111	0.0114972	0.0361142	0.0109888	0.0186376
SMAP1	3.1542	3.36155	3.17531	3.14233	3.0811	3.04553	3.63382	3.7574	3.33311	3.37567	3.76551	2.4673	3.0367	2.6531	3.33939	2.52401	3.1956	3.34087	3.00289	3.93479	3.24588	2.21805	3.234	3.1206	3.77995	3.16107	2.82646	3.49847	3.1924	3.37556	3.39701	2.4025	3.27145	3.05379	3.37276	3.19629	3.59161	3.39603	3.07391	2.72823	3.23066	2.92181	2.41105	2.93321	2.94128	3.66995	2.9928	3.23786	2.98806
MTFR2	0.451115	0.677356	0.376245	0.544102	0.313425	0.828592	0.611468	0.234957	0.461447	0.261137	0.601764	0.5069	1.44847	0.523947	1.11957	0.568643	0.680018	0.524376	0.52059	0.235861	0.783305	0.71922	0.460311	0.422866	0.406444	0.427836	0.620412	0.823475	0.676324	0.193373	0.504677	0.726271	0.456597	0.643773	1.00562	0.761396	0.378874	0.334899	0.178933	0.882579	0.429066	0.217327	0.533092	0.405288	0.423105	0.451252	0.210402	0.997381	0.628637
MORN1	0.241982	0.400307	2.07677	0.235168	1.21625	0.784084	0.365696	0.568689	0.453663	2.09829	0.293239	0.71569	0.388908	0.552932	0.560297	0.288313	0.327186	0.34868	0.339416	0.254855	0.507832	0.527436	1.28813	0.356398	0.367106	0.861949	0.755696	0.243666	0.438474	1.01523	0.384203	0.182635	0.564325	0.252774	0.257208	0.55457	0.474887	0.254649	0.404883	0.839951	0.581633	0.318324	0.400051	0.405082	1.09428	1.4902	0.26803	0.369914	0.360627
P2RX6	0.158558	0.107403	0.546757	0.323803	0.36704	0.120302	0.383013	0.209326	0.383772	0.368894	0.213909	0.245055	0.153463	0.398037	0.0763032	0.339854	0.1595	0.0835727	0.191954	0.213795	0.405729	0.112982	0.408156	0.248236	0.22672	0.235904	0.269419	0.150928	0.175158	0.182647	0.237644	0.164154	0.183357	0.427387	0.0824176	0.15337	0.287827	0.224866	0.436151	0.492315	0.228978	0.231392	0.11834	0.148698	0.14846	0.255648	0.258116	0.230382	0.0888042
E2F1	2.96478	2.39497	1.92323	1.40511	2.61437	3.45924	3.04828	2.09744	3.07267	2.71873	1.87101	3.20854	4.35006	4.48746	3.5183	3.48947	3.17739	2.97435	4.78474	1.44291	3.93486	2.26777	2.47429	2.8146	4.90667	2.60723	3.03024	2.87694	3.15555	1.93732	2.324	2.9599	2.89751	3.48797	4.66619	4.98229	2.4229	2.65889	1.91628	3.82106	2.86351	3.03725	1.57115	5.45471	3.67387	3.67161	2.85074	4.34041	3.47939
HTRA2	6.68838	5.42833	6.17741	6.37005	6.12996	5.36554	5.23579	4.45017	6.03817	6.88024	5.12469	5.83501	5.34822	6.70138	4.60613	8.16879	5.71922	5.43355	4.17083	5.32736	6.70857	6.37221	5.61146	5.73074	6.22799	6.29837	6.8659	6.25738	5.05215	5.37682	4.81309	7.1582	5.90977	9.90446	5.6897	5.0764	5.12425	5.10366	6.04084	6.33238	5.91243	5.1059	7.94862	4.89419	5.32616	6.29733	4.93616	5.74381	4.29235
HSD17B6	30.7164	94.478	28.8626	39.7853	29.1545	50.1921	34.2414	65.0438	39.1351	26.086	37.5222	21.5366	32.9311	37.205	59.3316	63.4656	30.7845	57.7927	23.8156	36.3493	37.5959	42.0459	41.1318	60.3586	49.8524	31.6103	47.3584	105.302	30.7161	44.3418	41.9047	55.5054	29.7524	30.9265	34.5155	86.4685	58.1785	52.4585	32.291	46.0855	26.7374	33.122	97.6372	65.902	92.3986	37.2101	41.7232	44.5178	71.055
KLHL5	6.59156	6.4786	7.62591	5.49722	6.95121	3.76706	5.8111	6.78599	6.70172	5.95869	9.15466	10.5745	4.14451	6.70866	3.45899	8.31256	6.48373	6.34625	13.1413	8.8933	5.91289	3.86916	5.58872	7.06256	7.29161	7.14514	5.17558	7.29505	4.46675	5.51518	6.79043	6.9811	7.91687	6.78879	5.74749	5.16426	5.69023	4.38349	10.6178	4.56735	9.80914	5.67002	3.06636	5.82313	3.75733	6.23279	7.39979	3.85164	4.64901
CYB5R1	19.228	18.4152	22.7602	20.699	15.359	19.2615	15.5942	13.6652	15.6686	20.4033	16.0651	13.8326	20.4379	18.5064	18.823	22.2294	18.0415	12.5213	9.64254	13.001	15.9984	20.0199	17.1879	15.3962	17.1146	15.7203	17.8012	22.6105	17.5179	15.1655	14.2378	20.2272	14.8939	18.6487	16.407	15.0175	16.0684	14.6952	13.2086	15.7875	16.7479	16.6884	19.6136	15.0189	18.5755	16.9907	13.9871	19.7586	14.4491
LARP4B	7.58331	8.48806	7.98528	5.93285	9.67316	8.29704	8.87544	8.86698	8.87831	7.38356	10.1323	9.89448	8.02805	6.91038	9.18593	3.46065	6.08565	10.096	7.05995	8.74111	8.52483	6.60843	8.50747	8.15731	8.16158	9.40944	6.74263	4.20749	7.59692	8.71921	9.08981	4.08307	8.08051	3.5115	8.79407	10.9534	9.38896	8.13704	7.65426	8.99303	8.40547	9.34709	5.61531	8.98954	9.37572	8.69377	7.76767	7.18259	9.77354
ACCS	1.74463	3.06356	3.75777	1.33392	2.49282	2.34938	1.84782	1.28053	2.05257	3.7487	1.72179	4.71097	3.90392	2.17764	3.50011	0.79557	0.971208	1.90548	1.62894	1.96719	4.64892	1.31641	2.73628	3.45578	2.16939	3.55772	1.61548	2.28022	2.44122	1.58811	1.56762	1.02176	1.38292	0.766419	1.21782	4.20396	2.90507	1.33532	2.22198	4.88919	1.24664	1.16779	1.30567	2.00972	1.85389	4.35865	1.28995	3.35542	7.06562
DHX30	11.2469	8.48444	11.7877	7.99168	10.4635	8.62298	9.73562	8.35815	9.83272	10.9017	8.92931	10.1675	8.75897	11.4487	8.32842	5.85726	8.38234	9.42646	8.07594	8.12738	10.4644	7.96585	10.2731	8.15635	10.3003	10.6888	10.3554	5.41093	8.98323	10.6954	9.57275	7.14386	11.2367	7.75105	10.201	9.70681	9.42945	9.52012	8.87774	9.71381	9.99992	8.83524	8.34385	8.46803	10.2338	11.0375	8.89529	9.27874	8.12895
RGL2	15.3422	14.5286	20.167	13.7411	17.6969	13.2997	14.324	15.0345	17.0067	17.5793	13.5915	24.6685	13.09	20.424	10.9363	13.1157	12.4396	14.552	16.9381	14.772	23.188	14.8759	14.5601	17.826	17.3238	15.8081	14.221	10.2665	16.6636	14.7474	13.8681	11.5273	15.697	15.7328	13.042	20.9201	16.9868	11.4034	22.5732	20.439	14.6192	12.9566	12.3265	12.6461	14.9853	16.837	14.5423	15.5472	15.8792
C15orf65	1.45154	1.60701	5.11807	1.21122	3.28717	3.30205	1.23984	1.50228	1.47332	6.72695	0.994472	1.42409	1.59457	2.41101	2.3119	2.16115	1.56615	1.09414	0.487232	1.59945	1.58926	2.24446	4.10409	1.10607	0.999514	2.80771	2.53162	3.27692	1.31039	3.6034	0.866708	1.80373	1.13317	1.76558	0.332955	1.96696	2.20223	1.29775	1.5295	2.17041	2.22947	0.736885	2.40059	1.52143	4.16499	5.20489	1.31953	1.33182	1.32873
MAP4K2	4.55413	4.19307	7.70778	2.62529	6.66946	3.5045	5.76635	3.37455	7.1903	2.52449	5.31377	7.92867	4.20366	9.00365	2.76501	3.18042	4.72611	4.80622	5.19176	4.73427	8.96595	4.69612	4.86799	5.29591	7.11681	5.9987	5.50796	2.09792	4.40479	3.93124	4.9891	4.2042	5.95022	3.54611	3.45546	5.13498	4.60338	3.52797	8.17551	6.21925	3.80227	6.69423	3.95354	3.19129	4.40228	5.2169	4.79551	4.48114	4.61651
SCN4A	0.0382904	0.0164267	0.0170766	0.20635	0.00809666	0.0186482	0.016898	0.0223362	0.0135155	0.0141051	0.0140212	0.0351374	0.0162995	0.00518843	0.0175052	0.0129947	0.011435	0.0359493	0.0393192	0.0175172	0.00878123	0.0157621	0.0139066	0.0167499	0.00619208	0.0246001	0.0260641	0.00752727	0.0334868	0.00675845	0.0102224	0.00784578	0.0182892	0.00538734	0.0132356	0.0335102	0.0112555	0.0368486	0.0562839	0.0554643	0.16223	0.00717368	0.0226242	0.0100335	0.00405468	0.00837856	0.0263182	0.0320324	0.0339553
ANK1	0.0840698	0.0752687	0.0972153	0.0420228	0.0741992	0.044148	0.0967853	0.0959497	0.168093	0.113104	0.0588927	0.195503	0.112029	0.196135	0.0802105	0.12901	0.133901	0.0579581	0.0900822	0.115939	0.171005	0.0869356	0.352237	0.134311	0.0803892	0.118982	0.14502	0.103472	0.0792771	0.108387	0.0962821	0.134813	0.168769	0.135769	0.0837502	0.191933	0.108878	0.0647234	0.100294	0.0693115	0.120942	0.0986114	0.073098	0.249028	0.0433508	0.0959783	0.110543	0.0978502	0.0829793
SRSF11	9.28466	13.6023	17.0804	11.1235	16.6874	14.5987	12.3971	12.2371	13.1024	14.1956	12.4702	22.235	14.1006	11.3171	14.9852	7.32009	7.88003	13.7979	15.8695	18.0332	19.2265	10.3301	14.8622	18.1372	12.548	17.7983	10.5227	7.49134	12.4899	13.6497	11.5417	8.5338	9.44066	8.41867	10.3723	18.8482	14.4938	9.66581	18.0691	19.6358	10.1659	10.264	7.02463	14.7318	12.0606	16.196	10.8709	13.3442	19.3175
TRIM69	5.3894	3.42151	5.60476	4.65927	4.58727	5.86782	4.12885	5.45014	6.99141	4.47281	4.03125	5.67894	4.07402	6.38256	5.09526	7.18016	5.08928	5.93766	5.22418	5.94594	4.8188	4.87161	4.47486	10.2391	4.85307	8.08735	6.48448	5.48746	4.65592	6.60241	5.04702	5.28318	5.25969	7.91242	3.117	3.78818	4.20121	3.88678	8.74239	5.70449	5.43923	4.37724	4.69689	6.12671	3.55503	6.41384	5.15969	4.21633	4.02287
HRAS	11.5395	7.61751	12.3954	9.40837	14.6944	11.7791	9.69643	7.42688	12.0411	11.8583	7.04776	12.5932	11.6441	14.4015	8.83791	10.6936	12.5637	9.89668	12.6395	7.94789	13.6127	12.0361	9.47483	7.22719	12.6701	11.2892	11.1301	12.9579	11.4846	11.4691	8.76083	13.0525	11.6676	16.2237	12.0946	11.5522	10.9146	11.4901	9.24953	11.4387	11.1338	11.3919	10.2496	9.12709	15.7996	13.6593	10.1704	13.6075	9.24368
ITM2C	26.7132	16.9663	25.4486	19.9767	26.9803	14.0362	21.1759	16.4823	20.7959	29.5823	19.5859	23.9566	11.0174	24.3116	11.9429	27.8898	37.31	23.126	19.788	15.3815	22.8961	15.605	36.831	26.0427	18.7171	18.2079	29.737	37.6601	17.8646	10.9083	16.4561	31.7573	28.1135	65.2913	25.3102	33.8965	16.9816	21.4504	19.7134	32.0911	22.9487	22.6698	30.1066	17.8264	22.1176	16.5269	20.6157	22.0185	21.021
TM4SF19-TCTEX1D2	0.0409467	0	0.0796853	0	0	0	0	0	0.0165178	0.0301671	0	0.0429428	0	0.044387	0	0.0277924	0	0	0.022425	0.0499532	0	0.119862	0.0396569	0.0358237	0.0794597	0.0350756	0.015927	0	0	0	0	0.100681	0.0130386	0.138266	0.0323515	0	0.0320969	0	0	0.043136	0	0	0.0148885	0	0.0346877	0.107518	0.056288	0.0685091	0.087146
FTSJ3	8.42541	8.93481	8.46231	8.07022	8.89113	8.563	10.4211	7.80191	8.0624	10.2889	8.85219	10.8416	7.67022	10.648	6.86927	4.86798	9.16747	8.98751	8.58985	10.6898	9.49698	6.06333	7.91064	10.0846	9.87127	10.2892	9.19097	5.65152	7.34923	9.2182	8.35708	6.16378	8.70346	5.55794	9.45717	9.67016	9.89625	8.08703	9.78655	10.1484	7.60925	7.90029	6.66129	10.4862	7.67325	8.84274	9.0731	9.54149	8.84359
GON4L	2.83997	3.35933	4.07181	2.408	3.65196	2.58054	3.7876	3.14592	3.36639	4.0194	3.79018	4.06462	2.9924	2.75856	3.10639	0.895525	2.19862	3.5207	2.92463	3.39623	3.97889	1.99385	3.74082	3.61876	3.49274	4.40497	2.87648	1.00376	2.65619	3.39536	3.36033	1.39768	2.99973	1.01356	2.49661	3.83639	3.32244	2.49369	3.82922	4.03426	2.81629	2.67208	1.33846	3.15649	2.7747	3.42112	3.16265	2.83387	3.65744
ABI3	9.96458	10.7836	7.51173	5.10438	8.07476	5.86738	9.09288	4.58454	11.2227	6.80849	6.20304	10.0458	27.0924	10.5056	6.92144	8.95607	13.0296	10.6363	6.79515	7.50949	11.6766	14.3375	6.33522	10.4896	15.771	10.5459	11.3652	11.1214	6.33067	4.65231	9.16498	11.8159	12.2622	10.8722	19.6251	11.4212	6.5637	14.019	10.7203	8.82116	11.6732	7.47948	10.6592	12.9712	4.71086	9.04519	7.43446	14.2922	8.53998
PITPNM2	2.84594	3.95944	4.71387	1.56659	5.20424	3.52877	5.11887	5.48688	5.59162	2.84431	4.0139	5.03396	2.5825	5.79177	3.24629	1.58511	3.61666	5.55559	4.77378	4.11059	8.1897	2.52573	3.86006	4.34267	5.49068	5.72468	4.13128	0.969006	4.76304	4.57833	4.9264	2.49677	5.07792	2.18485	5.08603	5.41495	5.11017	4.51142	5.61012	7.31256	3.71021	4.79181	3.14278	3.51362	3.37273	4.17107	4.25576	3.59375	5.17814
COA4	9.833	11.053	9.64483	13.0322	9.40948	10.812	8.93479	8.37582	8.89031	11.1352	8.27606	10.6349	13.2627	10.8782	11.618	19.4796	10.385	7.83206	9.36511	9.21932	9.39896	15.9996	7.49776	9.40999	11.1522	10.1318	11.7716	16.9704	11.177	10.8074	8.94589	13.7993	9.16671	19.5838	11.1778	10.1973	9.68468	12.4885	8.79482	11.1641	9.67278	9.16659	14.6592	9.98408	10.258	10.014	8.79396	14.2465	9.326
GLYCTK	1.54589	1.40507	1.67843	1.41202	1.52916	1.15357	1.08693	1.03169	1.29478	1.34161	1.02661	2.69292	2.39131	1.8888	1.09005	1.60947	1.28327	1.15891	1.60716	1.00689	2.05503	1.93665	1.29419	1.89118	1.35589	1.70579	1.33	1.15378	1.34737	1.01743	1.2591	1.68579	1.28905	2.27824	1.54744	2.28159	1.3042	1.15989	1.68607	1.35252	1.14183	1.13885	1.48145	1.2633	1.05433	1.4104	1.00851	2.15905	1.2454
CXCL1	8.193	16.3851	102.323	3.39215	22.6441	7.32172	2.44629	256.944	3.02245	27.1738	1.73985	18.75	5.95358	2.60828	34.8661	5.43693	5.21487	3.73643	11.3593	34.9643	17.5459	65.9312	16.0026	18.626	6.02863	4.27879	14.0505	1.62857	13.446	31.6746	65.8517	51.3739	13.8398	9.13614	7.65232	12.9276	54.5055	1.24276	110.671	4.39574	6.75934	130.055	30.4768	8.93864	7.09545	13.2758	79.5712	6.39535	10.4579
LYST	1.78406	2.85771	2.15534	1.70344	2.07155	1.65679	2.44946	2.49816	3.05571	2.05498	2.86518	2.66355	3.08813	2.39535	1.88056	0.972561	1.70043	2.531	2.09189	3.21622	2.40547	1.85347	2.32525	3.09176	1.82379	2.92893	2.28809	0.781743	2.0402	2.43249	2.5703	1.13481	2.73891	1.21074	1.60195	2.10643	2.70228	1.51062	4.45173	2.16459	2.46375	1.41614	1.46496	1.76132	1.96399	2.76371	3.90211	2.10782	2.51133
SIVA1	8.92183	7.81455	9.85674	8.97323	8.61927	9.89213	6.37557	6.76889	8.51169	9.32836	5.16911	9.95916	8.74195	10.4778	7.20921	18.5737	8.06273	7.38012	6.59485	5.83787	9.84841	16.8052	8.05648	6.39198	7.93898	8.13463	10.03	14.7785	8.13578	8.76433	6.64877	11.6375	7.83736	17.889	8.7566	10.7193	7.7483	7.48909	7.7265	10.8659	6.86989	8.06408	15.7919	7.81377	8.98986	10.1781	6.11239	12.6458	8.96492
SYNCRIP	15.332	15.838	16.4665	16.9935	18.0788	14.7119	19.4048	23.6797	18.056	16.6937	19.8148	17.482	14.1876	15.3164	17.74	12.8425	15.2366	18.167	26.2811	24.8081	15.7194	13.2446	15.958	19.7229	15.0366	18.5816	16.7496	13.9627	18.3168	20.6033	19.3336	12.7397	17.7716	13.3911	19.039	16.7146	17.9426	17.0001	19.4419	14.0485	19.3265	18.2712	12.3391	17.7594	15.9635	18.0724	18.732	15.3858	16.9007
HNRNPH1	16.9403	27.823	33.0306	18.0738	31.5482	25.1907	22.517	27.6917	25.4401	31.3205	21.5562	45.4535	29.2297	23.6423	26.9163	15.589	15.976	28.2748	32.3787	37.8483	38.6233	18.0374	25.347	34.432	24.4557	33.9769	23.0223	15.4539	28.5954	24.5966	19.4842	10.7533	18.5542	12.5766	17.9143	43.6037	30.4942	16.8646	40.7702	39.4688	19.6842	19.1494	13.5682	28.1189	24.857	28.2332	19.4523	31.0708	38.374
EMC10	15.6322	10.824	10.53	12.9147	11.2604	15.1159	10.6159	10.1268	11.1142	13.6504	10.2906	13.5961	14.6979	13.9239	14.0296	11.828	14.5855	11.7049	9.13745	8.04224	11.633	14.739	12.024	10.1951	10.9872	10.992	13.6494	11.9673	14.6202	10.4675	11.2374	14.1111	12.968	18.7734	16.9224	15.2925	9.99232	12.712	8.50543	12.3805	13.02	11.0529	15.9042	12.6491	14.7283	11.7231	12.9217	17.8564	11.9588
MCM3	17.9357	12.378	15.5808	14.5	15.1657	11.5365	17.4579	10.4657	15.0986	19.568	15.5867	16.6041	15.0332	16.7756	12.2908	11.8618	16.5183	15.4148	13.4504	12.9688	16.0313	8.45629	16.4281	14.1164	14.6553	15.9245	17.154	10.9528	12.8398	13.2623	12.5956	11.957	15.028	12.2455	14.7945	14.3952	13.7159	12.8383	14.3491	15.4712	15.2816	11.9538	10.0625	13.024	14.0535	14.9744	13.3275	16.4564	11.9991
IVD	15.2229	15.6508	13.8728	11.8479	12.7097	13.4159	12.6175	9.19199	15.2212	13.786	18.5627	14.4537	17.9298	14.0065	13.5239	11.0276	17.6156	11.1083	8.38501	12.3096	12.6148	11.4742	12.0721	11.3017	19.4087	14.316	12.8484	8.54241	12.6986	10.7413	12.7194	10.5034	10.6414	9.49727	11.8174	13.1083	23.4014	16.8296	10.5352	16.5747	17.7194	13.0267	12.9486	12.0009	12.5863	11.5974	14.1613	15.0727	11.8733
WDFY3-AS2	0.824069	0.988243	0.965936	1.1614	0.845025	0.852883	1.15139	0.879754	0.944659	0.618847	1.50996	0.914294	0.381401	0.862265	0.628385	1.4858	0.876707	0.934663	0.466996	0.978158	0.788049	0.519243	1.14324	1.18027	0.584506	0.839462	1.03958	0.870664	0.672272	0.844635	1.16428	0.797979	0.636264	0.69835	0.291607	0.451093	0.947745	0.666276	0.989425	0.905	0.831936	0.705778	1.33737	0.453551	0.927212	0.768622	1.16344	0.41523	0.893854
YIPF2	15.5272	10.6392	12.7367	13.0888	11.7078	11.9894	10.474	9.36395	10.8642	16.0651	10.367	11.0644	10.1431	13.926	11.61	16.9604	14.1943	11.9835	12.4486	7.40109	11.1734	14.8047	12.5558	9.94328	10.6675	11.2128	13.1463	16.7397	10.9567	11.4661	10.9816	14.6342	12.5243	21.2619	13.6984	10.8244	10.7889	10.8015	9.57555	12.6995	12.5497	9.24543	16.906	10.9923	12.4035	11.5529	10.5162	16.55	10.8319
TNKS	2.94667	2.93651	4.02422	2.26326	3.40079	2.83711	3.04532	2.4201	3.37747	4.32957	4.1775	3.65644	2.48074	2.85491	3.17002	1.47689	2.49732	3.50175	2.35591	3.27573	3.11912	1.43965	4.08945	3.66617	2.38304	4.03771	3.14627	1.45938	2.20567	3.30823	3.09222	1.60324	3.22339	1.41563	2.10059	3.08531	3.11682	2.62418	2.93939	3.37097	3.33909	2.02056	1.5864	3.0098	3.15862	3.43395	3.26465	2.40223	3.52553
PTP4A3	19.6677	13.9615	9.85685	15.9115	14.2737	12.0275	12.0007	22.0654	11.3017	13.5247	9.14374	26.6194	12.69	14.8802	12.319	11.7988	15.7119	12.1255	17.4399	18.7966	16.6762	15.5528	12.2315	12.3996	15.8949	11.5178	11.4632	12.1803	32.3009	18.9083	11.9165	23.7833	17.6634	46.9389	37.4632	32.6837	9.00171	18.2207	16.4208	14.2368	14.56	16.4097	20.0196	15.2579	13.6104	15.8395	15.7391	23.4145	19.3986
FTH1	368.884	426.367	258.408	372.698	270.826	315.205	311.462	349.584	281.856	216.117	285.494	389.62	668.443	408.403	569.497	314.323	352.1	244.855	262.267	272.656	272.088	665.753	264.629	264.568	327.817	335.33	417.929	326.242	358.934	328.656	361.469	466.412	477.111	487.181	556.769	338.999	234.27	409.698	335.897	253.268	301.178	338.254	645.918	536.404	289.041	329.015	349.974	411.987	337.442
LY96	13.0383	22.6529	10.2507	15.9803	8.96542	19.205	8.20765	12.2147	10.0208	8.76745	12.3825	14.3218	25.9986	12.9354	18.9673	25.8208	15.07	9.49716	9.33088	17.2152	12.7061	48.0414	8.56536	25.545	19.644	12.9235	14.8224	41.419	12.4661	9.68739	11.7128	43.8645	13.8531	43.917	16.1843	15.4228	8.92049	11.8152	22.6861	9.86485	12.0702	12.8167	27.2862	24.8103	8.48368	11.8389	12.1575	23.2292	15.0395
GBP6	0.218044	0.226768	2.93602	0.199404	0.827119	0.520019	0.198283	0.331473	0.0852931	1.44091	0.116136	0.180167	0.666036	0.193389	0.374567	0.34084	0.126286	0.209538	0.108559	0.128972	0.181835	1.62953	4.13393	0.381528	0.136769	0.633921	0.215886	0.467606	0.175666	1.5581	0.206973	0.292436	0.807933	0.10412	0.0887472	0.196606	0.569727	0.132259	0.164031	0.542933	0.554555	0.0495157	0.245054	0.277021	0.671689	2.39425	0.0726637	0.13266	0.0937493
MIR548AW	0	0	0	0	0	0	0	0	0	0	0	0	0	0	0	0	0	0	0	0	0	0	0	0	0	0	0	0	0	0	0	0	0	0.341765	0	0	0	0	0	0	0	0	0	0	0	0	0	0	0
GP2	0	0	0.012651	0	0	0.0037992	0	0.028441	0.00786717	0.0215522	0.0142827	9.62313	0.00664141	0	0.338803	0.0595669	0.00776551	0	0.016021	0	0	0.00356802	4.93448	0	0	0.0584709	0.0151716	0.0306706	0.00682227	0.0344225	0	0.0399605	0.0900465	0	0	0	0.0229309	0.00750717	0.031852	0	0.330511	0.00730748	0.134732	0	0.0330424	0.128022	0.0134046	0.0244724	0
MC1R	0.393591	0.328577	0.867166	0.122297	0.887749	0.442089	0.37556	0.455055	0.406232	0.5904	0.150618	0.981743	0.584445	0.307503	0.551162	0.115524	0.203315	0.349183	0.493254	0.631568	1.197	0.371074	0.51856	0.663878	0.527542	0.619639	0.515833	0.0836472	0.560667	0.555767	0.338266	0.104624	0.273245	0.211531	0.324979	0.906134	0.533664	0.240229	0.982201	1.0534	0.18314	0.292299	0.175345	0.438558	0.49864	0.577265	0.19985	0.664462	0.689256
TUBGCP4	1.49643	1.40371	1.24578	0.906411	1.32697	1.32714	1.51571	0.946097	1.38692	1.53333	1.57856	1.67129	1.04929	1.50342	1.19217	0.654747	1.31975	1.60122	1.07982	1.4096	1.48131	0.699477	1.64607	1.27675	1.21368	1.57093	1.16826	0.577929	0.941895	1.46689	1.31815	0.741395	1.03403	0.638342	0.940825	1.38538	1.70619	1.15615	1.28348	1.49269	1.22618	1.13069	0.853105	1.20738	1.62839	1.1907	1.19005	1.01686	1.50906
CHST8	0.1164	0.188648	0.0671181	0.0929318	0.0765747	0.0705467	0.102738	0.0829895	0.0834766	0.1334	0.0568315	0.0678192	0.0264264	0.13319	0.0118255	0.0702277	0.401689	0.0539672	0.0849976	0.0315563	0.0355925	0.0520566	0.106471	0	0.066928	0.0221578	0.105644	0.0508497	0.0542921	0.0365249	0.0828677	0.0106003	0.123551	0.181968	0.020437	0.158462	0.0506903	0.0597425	0.0760441	0.0817491	0.125249	0.00969223	0.0611344	0.0813365	0.0328692	0.0226402	0.0444476	0.129835	0.0367011
IL32	36.0284	20.8547	30.4769	22.7503	8.81222	29.2631	23.8958	35.1522	34.9823	24.2237	11.7471	31.3605	19.026	21.1278	20.8968	35.7336	31.2291	36.052	48.9952	33.3888	36.9315	16.5723	16.8273	40.0009	34.4127	48.3011	29.1762	16.8299	27.2981	11.8282	24.4672	44.7626	20.5127	57.0355	25.8999	18.3543	21.7911	25.0669	33.952	28.1583	25.1246	39.7758	10.4211	31.2523	10.9622	28.5091	16.8669	24.6246	22.4704
RUNX3	5.46315	6.07269	4.03643	3.04133	4.57654	3.2098	7.14814	6.99989	9.59685	4.17924	5.21538	3.85321	5.97366	5.56267	6.03252	4.48407	6.35924	8.12797	6.46668	5.40851	8.72612	5.03905	5.21077	11.0405	5.39677	8.31305	8.75119	2.17538	5.83715	4.07275	7.69789	5.73654	9.21504	3.5461	8.29833	5.85803	3.62567	3.84986	7.58856	6.44478	5.02861	5.97761	3.83007	6.51286	2.38797	8.66207	2.51333	7.36648	4.81678
MYBPH	0.120277	0.11258	0.0354648	0.0942807	0.221961	0.0426016	0.0193017	0.574051	0	0	0.048047	0.275214	0.0297889	0.0711175	0.199952	0.0148431	0.156739	0	0.790454	0.213429	0.100303	0.264061	0.0105898	0.210457	0.0990201	0.0374658	0.051037	0.0343919	1.1322	0.154396	0.0467058	0.161312	0.104454	0.0861512	0.993486	0.210522	0.017142	0.117852	0.47146	0.0460754	0.0705926	0.0491646	0.174933	0.114607	0.0185257	0	0.270557	0.201238	0.124113
DDAH2	34.5891	21.6044	36.1535	21.9705	31.2424	26.3833	29.1427	21.2385	35.3911	29.654	20.6732	33.8939	26.0476	47.9901	17.8608	30.9405	28.3136	25.5563	34.8371	28.2137	35.8099	28.1867	25.8477	26.1114	23.6618	31.3882	33.2057	30.0848	26.8222	21.0606	24.6911	23.9262	26.7035	45.6286	24.7172	27.3582	22.2368	19.3494	27.9719	32.4079	30.8885	31.8418	29.2252	20.98	29.5654	30.4243	26.1153	25.9435	20.8091
RPUSD1	6.01569	3.24123	5.06285	3.77966	3.47249	4.67096	4.01365	2.20363	4.52565	5.21969	3.07979	5.33719	5.1264	5.4935	3.91023	3.59934	4.38202	5.09173	2.39676	1.91298	5.53145	5.32041	4.22468	3.42971	4.10336	4.79901	5.21768	3.91206	4.65762	2.98914	4.16091	3.68035	4.47573	6.08919	6.74081	5.43934	2.98351	4.49964	3.2502	6.09705	4.78572	3.81376	5.53573	4.57211	4.48026	4.35449	3.78205	6.73784	3.97441
ARHGAP9	3.06804	3.78511	2.52709	1.61536	2.34429	2.15074	2.35117	3.59287	3.44427	2.39932	1.81558	3.60113	5.61076	3.16724	2.69612	1.46318	3.47027	3.33463	3.28039	2.64866	4.90137	3.41434	2.53147	5.84661	3.19225	4.33295	3.58161	2.03413	3.87828	1.99488	2.86659	2.15176	3.42731	2.45675	3.46419	5.14096	1.96741	2.46574	5.80431	3.41456	2.0752	1.82896	2.04635	3.94606	1.65662	4.13078	2.25429	5.66136	2.93848
APOL6	11.0469	11.5547	10.6131	7.9195	10.1997	15.0099	12.8191	10.5016	16.3684	12.6772	11.4536	11.518	13.2071	11.193	15.0556	7.27438	12.9702	14.9492	10.1286	15.7439	13.8992	8.51246	11.7226	19.2682	13.4287	22.6243	13.6637	11.9542	11.2093	11.9999	12.3417	6.79262	13.8335	9.81345	10.3874	10.1986	9.83789	11.4728	14.3549	14.7704	15.7402	8.27125	7.69596	18.7919	9.66726	14.8696	12.457	10.4144	12.6499
TAB1	8.79629	7.26607	8.76887	6.61331	7.82966	7.01312	6.77087	3.51898	8.48687	8.69301	7.06488	7.61791	6.64871	9.99147	5.98553	4.74389	7.49892	7.96186	3.34745	5.57628	7.62217	6.48914	8.59643	6.72701	7.88453	9.00715	8.50031	4.76446	5.57785	5.97271	7.62445	5.48881	7.88117	7.43814	5.81254	7.62839	6.88126	6.36287	6.31375	8.56671	6.99865	5.7223	7.71091	7.65997	7.57179	7.4975	7.02016	8.34428	7.00073
BCL11A	0.479999	0.306781	1.22166	0.644049	0.426705	0.662188	0.406367	0.1	0.569037	0.78305	0.595455	0.785918	0.697214	0.663684	0.443361	0.192819	0.901034	0.273866	0.101932	0.388394	0.642504	0.424752	0.834886	0.938448	0.639989	0.461523	0.478193	0.400549	0.400935	0.238606	0.683443	0.220792	0.372757	0.314242	0.19736	0.715844	0.41465	0.154604	0.467175	0.495344	0.679867	0.249595	0.309881	0.929214	0.601644	0.651625	0.491513	1.37675	0.632403
DALRD3	5.44597	5.07741	9.7429	3.78992	6.81877	6.00214	3.69968	4.0586	4.10837	12.7003	3.22686	4.87947	5.43968	5.50842	4.12669	5.99579	4.36262	3.53393	2.47177	2.64185	4.98592	6.33122	8.00509	3.64849	3.81401	5.65691	5.75448	6.71858	3.95272	6.57732	3.4726	4.07696	4.97035	6.47979	3.41768	4.5034	4.53784	3.16105	3.89403	5.43223	5.0698	2.65921	5.85091	3.71931	7.42886	7.15001	3.35267	4.72631	3.64297
FAM71E1	0.932622	1.01647	1.31625	0.978027	0.980704	1.86593	1.00113	0.882215	0.671091	1.54134	0.812238	0.898782	1.40774	1.09295	1.70547	0.633013	1.34491	0.778313	0.635003	0.799506	1.10987	0.903862	1.09854	0.749781	1.4185	0.885267	0.892197	1.0703	1.3579	1.37029	0.933123	0.950316	0.802634	0.922066	0.995748	1.3015	0.908878	0.679193	0.691616	1.22147	0.874688	0.887798	1.05398	1.40024	1.85772	0.838353	0.675672	1.39171	1.51995
ANO10	6.75297	6.16885	5.04895	7.08131	5.58863	4.82872	6.64237	5.0041	5.65909	6.08355	6.28797	5.86462	6.7834	6.45842	5.29049	5.47796	7.06346	5.06554	5.0211	5.81101	4.89001	5.63583	5.43756	5.94401	6.75633	5.42336	5.99683	6.00578	5.31751	5.17625	6.70776	7.0554	6.55208	8.05477	6.7659	5.46889	5.57729	5.29379	5.54573	4.24718	6.81444	5.34321	5.52979	5.00046	4.96493	5.24083	5.81924	5.37761	4.75102
PTTG2	0.0571239	0.0490127	0.0741116	0.041046	0.0483163	0.0890256	0	0.0999673	0.0230436	0	0.0836709	0.119817	0.0778132	0.0619233	0	0	0.136475	0	0.0312847	0	0.157204	0.0209021	0.0829868	0.199908	0.0739017	0	0.0222194	0.0449185	0	0.0806613	0.0406677	0.0936384	0.0545698	0.0321486	0.0676993	0	0.0895553	0.0879567	0.037319	0	0.0921995	0.0428085	0.0830823	0	0	0	0	0	0.0405252
TNFSF12	38.3697	31.8491	29.2372	31.6836	26.6702	26.4941	30.5008	19.0187	31.1175	18.1544	26.739	28.9271	38.0589	41.5707	25.0277	31.4116	35.567	27.9451	19.4088	15.9662	31.2183	40.2554	27.9446	27.4398	32.1507	29.1341	30.4049	26.5125	27.2491	20.0967	31.0177	30.1138	31.5335	40.7762	28.1163	26.2349	21.8681	30.9066	24.8267	33.9259	28.9051	27.849	46.1968	22.9875	27.4238	29.1432	31.2892	34.6031	25.3949
MCFD2	25.2449	23.7086	19.1187	26.1341	25.544	22.4684	25.4234	26.3564	25.4574	20.5615	24.1626	24.3588	14.5232	21.9335	21.5922	31.8919	22.2257	24.9452	22.0866	26.4555	24.9249	18.5205	21.2959	27.8738	23.7567	23.9183	23.6273	19.9468	18.1162	22.8192	22.6208	17.0018	23.1317	22.3852	17.2272	20.275	31.9944	17.9373	26.4715	17.5656	26.6468	23.6882	20.6978	17.5805	24.3568	24.5716	24.2566	21.2099	16.7018
PCGF6	2.02424	2.25526	2.29793	2.62679	2.86207	1.79512	2.03997	1.70953	2.7666	2.05894	2.9207	2.4873	1.97544	2.03874	2.34808	3.43485	1.85264	1.94145	2.0021	2.8012	2.2449	2.66978	1.89464	1.99565	1.95431	2.34219	2.03305	2.91025	2.02923	1.49314	2.02183	1.96861	2.1069	3.24762	2.11851	1.96983	2.19064	1.90731	2.39814	1.78236	2.60886	2.07167	2.263	1.86836	1.8044	2.76339	2.03507	2.37582	2.12192
VEGFB	73.8738	60.5455	55.7936	56.1014	49.2911	59.715	50.692	43.056	52.7886	50.0873	46.2345	51.659	78.7392	74.6246	44.6646	52.3178	60.9977	44.1993	39.1218	35.1889	52.2634	77.536	50.1434	42.5585	56.1892	53.8599	60.7686	48.5569	55.537	41.2345	52.274	58.7572	52.7176	60.562	55.2784	56.0095	42.6971	49.9009	38.3223	49.8728	54.5761	62.2056	88.4929	52.1382	59.5191	47.6977	61.0399	68.0946	47.179
RNF38	10.746	9.74982	12.5754	9.33874	13.1414	10.4181	14.8542	9.67849	15.3213	10.5465	15.6222	12.1129	8.72496	13.8238	8.03207	8.01399	10.1761	14.2275	10.3792	14.7571	12.9901	5.78158	13.6586	11.8264	10.229	14.3063	11.8417	8.26282	9.24152	9.85249	13.3273	7.94307	11.3979	6.24676	6.96597	9.60141	11.7353	10.5604	12.0366	11.8693	13.4779	12.9831	7.37733	10.0636	11.2825	11.3418	11.9167	7.0153	10.8992
SLC20A2	8.50257	8.15969	11.6364	8.72537	10.1703	6.33137	7.60687	8.62991	8.3608	8.03113	10.6257	8.53993	6.70391	7.48051	6.49439	6.05953	8.33086	8.61114	14.1047	6.91034	6.8046	7.88175	9.87824	6.73936	8.0317	7.10269	7.20402	5.51975	7.40212	9.76089	9.27967	6.66917	10.0198	8.04493	8.58917	8.9158	10.306	7.15224	7.14095	6.59969	11.9774	8.71252	7.52527	6.05552	9.39573	10.7325	8.28918	6.3845	7.02919
ZNF532	4.79742	3.68972	4.87965	2.9191	4.66535	2.94818	4.47482	3.30812	4.68595	4.63312	5.76666	5.93709	2.28555	4.77443	2.4975	1.84725	3.20371	4.78784	4.07718	4.14218	4.9174	1.71251	4.95019	5.03664	3.55296	5.16912	3.93251	1.38169	2.85617	3.70305	4.93555	2.04654	4.06179	1.99265	2.29641	4.30979	4.23305	2.703	5.3383	4.34933	4.37935	3.15831	1.82904	3.3892	2.63292	4.22358	5.07156	2.74096	3.82167
SGPP2	5.98123	6.53803	5.64151	8.13645	4.71375	4.98348	7.10157	95.7683	4.11444	13.0325	6.81979	2.90373	5.31887	2.59094	12.2252	3.61401	8.48061	4.77929	22.9073	11.5912	4.30909	8.76732	5.5178	4.29605	5.70207	4.26715	7.41448	4.252	14.2553	18.9048	7.16854	11.2592	14.536	12.5724	19.0664	8.76046	8.47734	8.05273	4.73078	4.38766	9.00456	15.3312	4.09149	3.50977	6.84616	8.15049	5.56279	8.24545	8.01642
SNHG14	0.84184	1.04549	1.52031	0.792573	1.40309	0.981882	1.14979	1.16536	1.20252	1.22613	1.32634	1.49976	0.741706	1.00032	0.985845	0.662965	0.797623	1.22676	0.945735	1.00463	1.21777	0.583295	1.52873	1.39466	0.818219	1.45151	1.02475	0.50666	0.958232	0.990594	1.06265	0.42991	0.907991	0.515081	0.518459	0.879371	1.3071	0.743668	1.13661	1.40191	0.849221	0.958442	0.625146	0.934411	1.0926	1.11753	1.03188	0.771971	1.15387
DCLK1	0.962445	0.454712	0.360704	0.722141	0.483089	0.630145	0.727085	0.387634	0.563818	2.39932	0.717931	0.607634	0.325419	0.516445	0.579973	0.61132	1.06933	1.20537	0.612063	0.609683	0.460961	0.278317	0.92415	0.458852	0.259327	1.10789	1.25286	1.14006	0.699299	0.32182	0.363607	0.301577	0.673275	0.511518	0.534786	0.732951	0.421879	0.4524	0.516645	0.569869	1.30301	0.242819	0.219655	0.794364	0.416387	0.319653	0.522799	0.815485	0.894146
TGFA	3.1734	2.81151	3.43093	2.78313	3.0541	3.77739	2.98343	4.89003	2.84583	3.70912	2.98228	1.75997	2.89266	2.44422	3.00337	2.61818	2.86922	2.79436	3.39315	2.74589	2.56815	3.26525	2.67674	2.90857	2.59806	3.78121	2.38518	3.38968	3.68369	3.84083	2.29318	3.73519	3.37594	3.41076	2.95342	2.47793	2.18828	3.56978	2.36935	2.49683	3.94095	3.54634	2.57089	3.13446	3.44294	3.54331	2.62944	2.59487	3.48132
CARD11	2.8596	1.74124	1.71628	0.813464	1.37603	0.986724	1.22867	1.07131	3.35919	2.97793	1.36957	1.81172	0.873873	2.42717	1.61786	0.836712	2.53108	2.61041	2.11722	1.38111	2.87706	0.954298	2.32283	4.57813	1.95281	4.19518	2.68452	0.481373	1.77774	1.00651	2.04178	1.37464	2.51545	1.04773	1.48745	2.93561	1.32127	1.02007	2.36124	2.48244	1.17756	1.07463	0.646425	2.88302	0.838282	2.68641	0.904937	3.68308	1.31478
TWF2	33.9867	22.2257	19.9271	23.6668	17.9197	27.2592	22.9971	15.9691	21.2483	22.4007	16.6254	24.012	44.2473	28.5143	23.685	24.0892	32.262	22.846	17.5881	17.1341	23.2264	51.5653	22.3423	18.3462	24.2592	26.8056	30.7493	33.5912	24.9367	18.6859	22.6167	32.4762	28.7908	47.0357	42.4459	26.1169	14.7413	23.8414	20.7543	23.778	22.3893	20.2556	39.3749	31.733	21.9626	26.8209	21.1662	37.4568	21.4781
STEAP2-AS1	0	0	0.0211966	0.0469582	0.0276379	0	0	0	0	0.0240738	0	0	0.0222553	0.0177107	0	0	0.0260222	0	0.0357909	0	0	0	0	0	0	0.0279908	0.0254199	0	0	0.0230699	0	0	0.031215	0	0	0.0285967	0	0	0	0	0.02637	0	0	0	0.0276812	0	0	0	0
SLC26A7	0.179335	0.0917826	0.128579	0.0723425	0.138379	0.129937	0.0555388	0.0587299	0.142148	0.0880824	0.0599088	0.211175	0.0471431	0.133012	0.0402741	0.21782	0.0601335	0.210053	0.0654769	0.0614122	0.0173168	0.0529567	0.124932	0.170661	0.0122109	0.145536	0.195806	0.0494798	0.0132073	0.173262	0.0806351	0.0154721	0.0841557	0.0743677	0.012429	0.0385483	0.123312	0.0145332	0.147991	0.0464023	0.121874	0.0235778	0.0434715	0.0197863	0.0426449	0.038553	0.320051	0.0157922	0.0357123
HECTD2	0.835609	0.887664	1.16715	0.758297	1.04479	0.787293	1.06583	1.22718	1.17107	0.950846	1.09724	1.49505	0.697563	1.03522	0.838378	0.880693	0.735719	1.20701	1.27152	1.50273	1.28548	0.657091	1.07905	1.1473	0.86841	1.316	1.09284	0.576806	0.694772	1.00891	0.894179	0.56151	0.82965	1.16059	0.597328	1.01442	1.25577	0.719235	1.68179	1.11175	0.927055	0.834939	0.600116	0.750722	0.858837	0.969116	1.04404	0.688911	1.15615
CNNM2	1.22475	1.12035	2.4015	0.939982	1.10239	1.06177	0.926264	0.768749	1.41927	1.71202	1.36183	0.956053	0.856402	1.08912	0.888798	0.466117	0.957062	1.06751	0.454232	0.958732	0.869522	0.665364	1.7857	0.880064	0.828995	1.09989	1.87171	0.600847	0.703779	1.29236	1.34619	0.552942	1.05796	0.827404	0.455652	0.833782	1.08799	0.699968	0.889385	1.21509	0.983514	0.748396	0.717448	0.904816	1.11231	1.41591	1.06203	0.79499	1.35863
GGT5	16.2937	1.71745	4.46004	3.89321	5.02949	2.43364	2.55513	2.70802	3.88742	11.8986	6.04524	5.05323	2.93979	3.75658	2.95694	2.14193	7.89764	2.55741	3.4994	1.86924	2.9367	3.99375	2.16594	2.08779	3.61866	4.04369	4.53964	2.3943	3.0609	2.2234	3.21211	2.5918	4.60499	5.61422	4.42509	2.47075	3.76673	2.67548	2.3811	3.6198	9.26603	3.53268	3.45654	2.88396	4.0045	2.76209	7.06728	7.86536	2.41452
KLF17	0.0567316	0.0649016	0.21263	0.172115	0.490508	0.10315	0.4896	0.139729	0.183083	0.0928812	0.249289	0.0793296	0.137385	0.129829	0.0230542	0.265266	0.220877	0.326154	0.144993	0.19994	0.508851	0.0830343	0.0671545	0.242654	0.220183	0.226787	0.112786	0.1487	0.114665	0.142413	0.269256	0.0826626	0.104376	0.198662	0.169331	0.110332	0.207528	0.23294	0.189432	0.106249	0.152611	0.207849	0.128352	0.118926	0.0640797	0.242759	0.121313	0.0632796	0.1431
MIR345	0.402782	0	0.130641	0	0	0	0.355505	0	0	0.296746	0	0	0	0	0	0	0	0	0	0	0	0	0.195047	0	0	0	0	0	0	0	0	0	0	0	0	0	0	0	0	0	0	0	0	0	0	0	0	0	0.285744
C20orf141	0	0	0	0	0	0	0	0	0	0	0	0	0	0	0	0	0	0	0	0	0	0	0	0	0	0	0.0203629	0	0	0	0	0	0	0	0	0	0	0	0	0	0	0	0	0	0	0	0	0	0
CARS	3.73607	3.85007	4.66854	3.84312	4.17124	3.98691	3.41904	3.07408	3.70118	4.80967	3.341	3.69961	4.25083	3.98389	3.3657	3.3046	3.88354	3.42314	4.15684	3.58871	3.97557	4.06808	4.42396	3.53013	4.20505	4.57823	3.83497	3.08315	3.99514	3.84833	2.76338	3.0879	3.86708	3.40403	4.31277	3.82034	4.0877	3.69379	3.54298	3.8944	3.48478	2.9059	3.1888	3.59856	4.10449	4.72609	2.97879	3.8032	3.67718
SKP2	2.85989	2.75391	3.60026	2.25453	2.8888	2.63735	2.13377	0.474078	2.19945	3.3424	2.47871	2.97772	2.3262	3.14478	2.49263	2.04587	1.78597	2.58416	0.619742	1.88252	2.8122	1.46429	3.14841	2.44807	2.20262	3.42799	2.49692	1.32665	1.4179	1.60514	2.56332	1.66946	1.74273	1.63846	1.38987	2.43083	2.69336	1.79784	2.38586	3.33792	2.10042	0.755514	1.44011	2.05949	2.28329	2.6022	2.35459	3.26169	2.7149
DHODH	1.40587	2.17271	2.12917	1.00813	1.79451	1.60658	1.61084	1.17774	1.87737	2.20598	1.75847	2.47627	1.74413	2.08041	1.7313	1.44392	1.44888	1.76107	0.952666	1.30806	1.66372	1.3377	1.61567	1.77136	1.97373	1.90536	1.91893	1.25572	1.44447	1.4657	1.84744	0.860104	1.42564	1.2518	1.47801	1.8917	1.85085	1.65535	1.95241	2.37326	1.50507	1.39334	1.64449	1.66186	2.18385	1.65731	1.72091	2.47148	2.41956
HEATR3	4.01048	6.3072	4.60018	4.3802	3.60763	5.81269	4.20606	3.0991	4.39286	4.24085	3.5522	5.18574	8.68298	4.95608	6.91112	4.2785	4.45633	4.93769	2.54782	4.23643	5.76511	6.02526	4.74324	5.14337	5.99413	5.41588	4.62114	3.60622	4.80633	3.65095	4.51449	3.67373	3.68394	4.09987	5.24875	5.73132	3.92777	3.85039	5.06131	4.83131	4.18082	3.60654	4.31981	5.22233	4.51661	5.65767	3.95644	7.49948	6.35974
GIT2	2.78658	3.05115	2.34084	2.37508	2.06108	1.83751	2.66789	1.79554	2.64563	2.26559	2.61075	2.90713	3.0851	2.42983	2.40929	1.35324	2.49306	2.97014	1.43831	2.72387	2.67118	2.13099	2.63528	2.94032	2.49071	3.34084	2.67912	1.21019	1.72935	2.01471	2.65409	1.74159	2.70468	1.55349	2.2074	2.39788	2.17974	1.96804	2.89828	2.36135	2.69104	1.78681	1.78055	2.60912	1.80257	2.50022	2.88097	2.4799	2.59309
KCTD9	6.79941	7.65754	7.46902	8.03062	8.69894	8.25626	7.58313	8.8678	7.76358	6.76768	9.46461	6.23361	6.68584	5.98441	7.74034	8.98563	6.4763	8.28988	9.7657	11.4921	7.74912	7.30241	8.25553	9.45491	6.33229	8.47829	7.10407	7.71187	7.44759	9.02244	7.45009	7.96438	7.97515	7.35929	8.14714	6.94364	8.9725	7.71686	7.43675	6.78346	6.79543	8.24048	7.10583	7.09847	7.09519	7.96132	7.60752	6.53949	7.69234
TTC7A	16.7058	14.0511	14.004	9.44474	14.9757	18.6524	20.1196	14.7751	14.2848	17.0578	12.6549	11.8728	18.8566	14.3318	15.1658	6.28061	13.1276	20.2892	10.9846	12.0023	13.9491	16.6694	15.0573	10.9581	12.8235	16.3931	16.2551	8.77695	18.6031	18.7447	14.4005	9.43699	19.2256	9.29316	23.0524	15.1522	13.2733	17.3964	9.33305	17.0545	15.9939	14.6818	13.7865	13.4914	23.4443	18.3708	12.3844	14.0801	16.099
ACOX2	5.45702	3.02783	3.45035	3.84393	3.46064	4.24432	3.19595	3.60394	3.51556	3.70767	3.91786	5.69622	2.93994	5.42209	2.32878	2.87428	3.01396	3.24379	2.13992	3.84341	3.19025	1.8901	3.68522	4.93088	4.30734	4.35475	4.07414	2.89555	1.80341	2.2315	3.93958	2.33901	3.58284	3.49425	1.94362	4.11781	4.21746	2.77982	3.62187	3.74991	4.53184	3.05082	2.26129	3.04482	4.6532	3.18721	3.69806	2.85803	2.58332
ICAM4	0	0	0	0	0	0	0	0	0	0	0	0	0	0	0	0	0	0	0	0	0	0	0	0	0	0	0	0	0	0	0	0	0	0	0	0	0	0	0	0	0	0	0	0	0	0	0	0	0
RAX	0	0	0	0	0	0	0	0	0	0	0	0	0	0	0	0.00719244	0	0	0.00580341	0	0	0	0	0	0	0	0	0	0.00741384	0	0	0	0.0033743	0	0	0	0.00830641	0.00815813	0.145379	0	0	0	0	0	0	0.00927489	0	0	0.00751756
BBS5	1.22594	0.988678	3.20069	0.76572	2.30101	1.91396	1.09351	1.11692	1.22674	2.90428	0.983491	1.47197	1.41621	1.54495	1.52097	0.770354	0.876255	0.954409	1.04388	1.09923	1.38289	1.50901	2.58022	1.14457	1.16569	1.75892	1.61759	0.776648	1.26081	2.14091	1.00538	0.553876	1.28562	1.02394	1.24241	1.34964	1.28356	1.07389	1.2339	2.17225	1.62211	1.03234	1.14354	1.13513	2.10645	2.24462	1.01234	1.0292	1.06947
ATP6V1B1	3.04265	1.18722	3.71585	0.363488	1.40946	0.469549	0.866719	0.190941	5.5458	1.24962	1.02427	5.32089	0.516814	2.91927	1.0339	1.68648	0.545043	0.583586	1.70302	10.455	1.33755	0.609746	5.19474	0.585764	0.98167	0.509806	1.80563	0.327585	0.385154	2.00636	1.31344	0.451197	2.59155	0.133975	0.252739	0.989599	2.37921	0.137455	1.10809	6.00313	0.552328	1.92893	1.07657	0.54582	1.52511	1.97944	0.623815	1.53096	0.83386
MYO9B	13.9908	15.3985	10.7848	7.44708	9.971	8.67591	11.0598	11.2421	13.2021	10.1556	11.6964	15.7797	25.9359	11.25	12.3497	2.83862	11.3409	11.2057	10.5981	9.41024	13.8715	14.6887	11.1271	14.6495	13.7624	15.0676	13.6312	3.10761	11.1349	9.75172	13.7399	6.28634	16.3218	6.28613	16.8333	16.6925	9.06656	9.77532	12.4012	11.2443	10.8713	9.64316	8.78778	15.3507	8.48074	12.197	13.6418	16.1124	13.2302
MYLPF	0.158737	0.121065	0.125854	0.101386	0.179016	0.164924	0	0.0205771	0.184988	0.181919	0.155004	0.184972	0.288305	0.172074	0.0645065	0.071828	0.0561837	0.0883152	0.135231	0.0430338	0.194152	0.283962	0.0341638	0.0925846	0.0456355	0.181302	0.0960459	0.0832136	0.0493594	0.124524	0.17579	0.231293	0.078628	0.277932	0.0418054	0.246969	0.138255	0.108629	0.0921802	0.0743218	0.0569346	0.290784	0.16674	0.11092	0.119531	0.0926246	0.0727368	0.118039	0.0750749
LYZL2	0	0	0	0	0	0	0	0	0	0	0	0	0	0	0	0	0	0	0	0	0	0.0176569	0	0	0	0	0	0	0	0	0	0	0	0	0	0	0	0	0	0	0	0	0	0	0	0	0	0	0
SIRT2	10.5087	10.3932	10.3261	8.7859	9.97198	7.84031	9.32001	7.93547	10.479	7.78424	9.18711	11.001	8.70807	12.825	6.90631	10.5334	9.42942	8.49473	7.8913	7.21085	10.2741	11.5913	8.9093	9.72657	11.3184	8.81177	9.63302	7.91426	7.56971	7.54025	8.53335	10.3283	9.16441	13.8235	8.74624	8.74166	9.25656	7.95857	10.4243	9.2199	8.60349	9.80003	11.2509	7.38521	8.28989	8.79267	8.60479	8.51532	7.43715
SSRP1	20.5541	18.913	22.8903	16.8975	18.9981	15.5616	18.5135	17.436	17.9176	27.2736	19.5953	19.1173	15.1834	20.6061	16.2563	15.6734	17.261	17.5258	17.6244	16.473	18.6573	13.9317	20.2603	16.8219	19.0276	18.5455	19.2315	13.8822	16.335	20.0628	17.2706	15.2423	18.5368	14.6646	17.8425	17.7996	20.9881	18.3689	17.023	18.8285	19.0737	14.9377	15.3489	18.0267	20.5668	20.2442	16.5111	19.1506	15.443
GPATCH2	1.07697	1.15027	1.57263	1.59908	1.72735	1.2327	1.24638	1.51455	1.42412	1.45192	1.37783	1.97306	1.23572	1.08995	1.64256	1.31639	0.921726	1.64092	1.8698	2.79672	1.26259	1.58937	1.60136	1.70461	1.21696	1.53886	1.25673	1.15609	1.29751	1.86463	1.42527	1.48703	1.55959	1.597	1.18279	1.64648	1.45372	1.33831	1.98522	1.16751	1.39205	1.40653	0.999294	1.55975	1.38556	1.68188	1.44055	1.13648	1.51856
BCAR3	6.27475	5.8036	6.78227	4.47212	8.40955	6.11873	6.50217	5.36599	6.7015	7.04822	5.60162	5.44349	6.73977	5.67324	4.14457	3.5602	5.41785	6.84704	5.61237	3.82985	6.27668	4.14509	6.95284	4.65066	5.68695	6.93425	7.47583	3.97064	4.08059	5.63781	5.69607	5.09471	5.8359	5.50741	4.08855	4.08344	5.98331	5.75595	3.73871	5.22881	5.67981	4.09507	5.09254	3.71718	6.24742	6.18757	5.5962	5.52758	5.77054
SHROOM3	9.21047	8.03006	12.2287	6.6774	11.8333	11.6603	10.4023	15.6976	10.0919	15.5737	12.0101	6.70076	5.68376	8.12761	9.55562	4.16364	7.5368	10.6267	14.4354	9.46703	7.79276	5.91169	11.5641	7.34823	9.12352	11.7635	7.44171	4.65144	14.1535	16.8875	12.0273	7.17897	13.0211	3.82372	8.6979	9.56092	12.615	9.99958	5.81241	9.95099	13.4377	9.4571	4.43368	11.8218	14.4058	10.9116	9.58516	6.37893	9.67409
SYCP3	0.0670075	0.185747	0.11034	0.0962957	0.113352	0.136561	0.127384	0.0360812	0.14555	0.121519	0.113247	0.140548	0.175532	0.100575	0.197942	0.0419825	0.0574676	0.129048	0.0395205	0.13834	0.274242	0.041493	0.139778	0.153324	0.04001	0.291414	0.0681671	0.0729559	0.0649123	0.109174	0.0807299	0.0422461	0.0755009	0.0232068	0.0488694	0.18946	0.121212	0.111112	0.101021	0.380101	0.0499163	0.0849798	0.052477	0.0864417	0.157195	0.0902298	0.0354281	0.137984	0.321789
VPS37B	11.8557	10.9858	14.3684	15.8942	21.6875	13.6405	9.51604	28.6111	11.9029	9.19868	9.26541	15.709	6.92772	11.1986	13.823	9.88324	7.54054	12.5336	27.1955	11.3572	14.6468	15.2925	10.8465	15.1467	9.29878	10.0819	11.5984	7.3986	22.9218	20.3922	14.6101	10.2496	16.4479	10.1278	17.2096	13.7065	17.0482	9.15806	14.6719	12.0425	9.69614	26.7384	11.5172	16.1031	13.6946	13.7952	16.1609	8.26506	9.90192
NUDT3	2.35919	2.6978	2.41191	2.59145	2.03926	2.16597	2.44105	1.81324	2.30528	2.69525	2.91855	3.01752	2.5568	2.03037	2.1899	2.22071	2.45004	2.76703	1.77219	2.21206	2.14588	1.72795	2.92943	2.68463	2.33548	2.89483	2.17787	2.18101	1.93497	2.37466	2.55054	1.7703	2.57349	2.716	1.94898	2.04723	1.59314	1.80708	2.59827	2.0823	2.71434	1.88146	1.7533	2.58556	1.81289	2.55673	2.65693	2.24366	1.99031
SMAD9	5.06253	5.91192	6.16761	3.59305	6.09627	4.03089	6.25199	3.53655	8.0993	2.55089	7.87994	3.60224	1.94481	7.94023	2.78111	3.26764	3.6197	4.8005	3.53559	5.51135	7.26972	1.74138	5.45082	6.52303	5.55454	5.14017	3.50909	3.26495	2.50928	4.30956	5.06738	3.14306	3.93132	3.35763	1.34327	3.73033	7.08791	3.59486	4.35272	3.10983	5.4715	5.04469	2.46272	2.90617	4.39971	4.40691	5.41858	2.06564	4.4331
SNX11	8.71878	7.14736	7.42391	7.42498	6.80508	8.48285	6.4056	5.24881	7.06077	5.94364	6.61379	6.97983	8.5067	7.64768	7.32637	17.0068	6.73851	6.06578	7.092	6.00934	7.96285	10.5221	6.88041	8.40846	7.95164	7.63274	7.40857	11.6632	6.65524	6.49182	6.26553	10.2547	7.1421	13.3251	7.51563	5.33596	6.51262	7.48349	7.94504	6.93051	6.59007	7.16138	9.46483	6.47101	6.4541	7.63603	5.80837	8.68117	5.53691
ITPR2	4.21505	4.74149	2.54449	3.59929	2.99039	2.66331	4.39934	4.4643	3.73788	4.15347	5.31912	4.40592	5.70794	3.02376	6.10015	1.37637	4.10748	4.55498	3.31811	4.32072	2.59288	2.65191	4.00582	4.65329	4.0172	4.85049	3.72341	2.36381	3.35514	3.84694	4.83564	1.96396	4.38494	1.9427	4.48234	4.28898	4.03815	1.71132	3.22393	3.10813	4.78199	2.76318	2.266	4.93233	3.1708	3.67981	4.84737	4.69551	4.4014
FAM84A	2.2693	0.7554	3.51527	0.85589	1.19465	1.4528	2.21902	1.28257	2.4671	2.09506	1.62057	5.3573	0.7728	1.34226	0.585452	3.01025	0.911099	1.59129	1.55223	1.60823	1.20496	0.869978	2.66519	0.568428	0.831407	1.7463	3.53441	1.44383	0.612677	1.33293	2.27921	1.25796	2.09737	0.559077	0.639806	0.811704	1.22525	1.59484	2.03617	1.81529	1.71357	1.64416	0.960369	0.893194	2.23352	1.34339	1.02582	0.834988	1.96395
MTNR1A	0	0	0.00993233	0	0.0518023	0.0119311	0	0.0178633	0	0	0	0	0	0	0	0	0	0	0	0	0.0280911	0	0.0741451	0	0	0.0262319	0.0119113	0	0.0214248	0	0.0436018	0.0250986	0	0	0	0	0.0480083	0	0.0200058	0.12904	0	0	0	0	0	0.0268029	0	0	0.0217245
EPB41L5	9.5077	12.6297	10.5363	9.78838	13.9144	14.9566	12.3614	12.9432	12.2104	5.35185	11.8393	10.3526	5.36472	12.7108	10.2196	11.8934	6.77739	13.6686	9.6454	16.2661	14.3183	6.172	12.625	12.6624	10.8586	12.8205	8.64045	8.75544	8.31978	12.4824	12.9682	8.97952	7.23602	5.5818	4.24404	10.005	18.1528	8.61148	9.23301	14.0731	9.66185	14.6358	6.13162	9.21434	15.4566	13.6618	10.1496	7.04476	12.2741
KLF4	23.1776	39.3566	76.1868	38.0444	96.0628	29.5436	48.2744	60.3995	34.3573	15.6493	28.8846	30.7167	17.656	32.7846	23.1304	19.0084	25.653	65.9642	46.1422	79.0824	102.047	61.9458	34.7866	46.6526	32.2251	22.6035	25.8523	8.56766	46.3647	40.0014	108.873	28.9833	59.2084	37.5993	28.7193	38.595	93.0609	20.3646	114.518	43.1627	21.0596	59.4767	54.6053	62.7438	11.4601	26.4004	104.438	12.9505	25.8218
VGF	0.0437936	0	0.0520823	0.0104892	0.0246942	0.0455005	0.0515377	0	0.0176662	0.0537743	0.0106909	0.443975	0.0298274	0.0237365	0.0266948	0.0792658	0.0232506	0.0243651	0.0639577	0.0890438	0.013391	0.0213659	0.127242	0.0127715	0	0.0125048	0.107884	0.0114788	0.0204265	0.0206128	0.0103925	0	0.0604291	0.032862	0.0230672	0.0127754	0.0457713	0.0112385	0.123978	0	0.0117807	0.0218792	0.0159236	0	0.0247329	0.102216	0.0200672	0.0122121	0
PRKD3	6.17482	6.46675	5.55903	6.92457	5.65786	5.24549	6.52645	4.43253	7.21858	5.17805	9.08393	6.03333	4.4195	6.38661	4.73867	6.77381	5.31175	6.26739	5.08789	7.1311	6.01605	3.48394	5.70229	7.13672	5.70281	6.95798	5.94121	5.50843	4.60186	5.28587	6.19689	4.99619	5.56929	5.44742	4.15408	5.27412	6.35802	4.98672	6.61048	4.932	6.85049	5.17749	3.98742	4.9273	4.51445	5.30848	6.80919	4.36782	5.83075
PLA2G12B	0.822346	6.78557	0.363199	1.03092	0.887941	1.48611	2.68709	0.836931	1.34105	1.13437	3.02409	0.660588	2.57404	1.65011	2.04774	2.9452	1.28191	3.73805	0.459951	0.768429	1.89393	3.67486	2.76213	2.63291	1.9693	2.60791	3.17145	3.79729	0.734483	1.01295	1.54458	1.49141	0.824579	1.2801	0.967676	3.30748	1.86526	2.23607	1.64601	5.97204	0.508323	0.760496	3.4736	4.9149	2.25298	1.31703	0.625356	0.907503	3.20246
KIZ	2.26283	2.5757	3.97828	2.71263	3.12899	2.69364	2.66298	2.32602	2.76752	3.7252	2.9258	3.25164	1.85873	2.85151	2.23189	2.4955	2.00429	2.52423	1.78106	2.29353	3.34487	1.86124	4.28032	2.93808	2.08403	3.12998	3.15211	2.16979	2.30713	2.5369	2.16953	1.65271	1.89492	1.43348	1.17692	2.72006	2.77504	1.68666	2.9368	2.95482	2.15955	2.36327	2.44491	2.35192	2.43391	3.11186	2.39681	2.28937	2.58141
NR0B2	5.5487	4.18953	2.51404	4.02379	4.2744	14.5011	3.58642	1.15527	2.39674	2.71692	3.476	4.69116	2.48844	4.62684	6.49395	2.82751	4.07891	6.46863	5.32963	4.24896	5.043	5.24758	2.87711	4.6603	2.31918	2.89574	2.85556	4.56451	3.034	8.31715	3.37897	3.61022	2.03326	2.30602	4.76166	4.45258	3.90782	2.73396	2.31997	8.2015	3.7752	4.96423	8.82751	5.29691	5.81421	3.67606	3.49697	5.71305	5.15971
MSH3	2.92964	4.55263	5.01073	3.16213	3.60878	2.54414	3.9212	2.87028	3.24279	4.9961	4.95413	3.7098	3.96787	2.6533	3.73253	2.81061	2.70356	2.85414	2.21732	3.05761	2.4683	3.57633	4.82635	3.28546	4.00157	3.78411	3.6061	3.46705	2.25202	4.68124	3.37765	3.1191	3.15766	2.08042	2.34116	2.97104	3.72558	2.16834	3.92096	3.00239	3.3147	2.79537	2.91682	3.24202	3.08897	4.91565	3.94662	3.27479	2.76521
ETNK2	1.15629	0.908796	1.84655	1.37628	1.33636	0.907894	0.973823	1.17395	1.01122	2.40609	1.05368	0.870148	0.679325	1.06686	0.677924	1.17424	1.24418	0.972336	0.928131	0.463028	1.11737	1.00445	1.48318	0.71045	0.73082	0.975371	1.49691	1.03416	0.796632	1.06563	0.741494	0.875358	0.980919	1.43064	0.924028	0.764744	1.07243	0.604791	0.813065	0.95775	1.3819	0.932665	1.18748	1.00842	1.23377	1.49104	0.879689	0.827012	0.776467
APOBEC4	0.252934	0.995736	11.2199	0.117599	2.70566	2.15065	0.459624	1.90074	0.768249	7.91427	0.326893	0.998642	1.12483	0.935455	1.49644	0.383751	0.367312	0.0993338	0.244452	0.0363022	0.341212	2.54787	6.54206	0.26034	0.00962421	1.98824	1.25005	0.947657	0.94727	5.56739	0.296584	0.439003	1.75297	0.167469	0.0411436	0.195316	1.15462	0.0458184	0.340203	0.799373	1.8491	0.111499	1.04952	0.421061	3.68043	5.5867	0.102265	0.31117	0.0316656
GALR1	0.00383266	0.00657691	0	0.0165236	0.00324173	0	0	0	0.0185531	0	0.0140345	0.0040195	0	0	0	0	0.00305222	0.00639704	0.00839605	0	0.0105474	0.0014024	0.00185597	0	0.00495835	0.0229819	0	0.00301376	0.00268148	0	0.0709423	0	0.00488174	0	0	0.0100626	0.00300431	0	0.0250388	0.0161503	0	0.00861657	0.00139358	0.0040172	0	0	0	0	0
GMPR	6.35771	7.55652	7.37077	5.62935	5.20543	8.11678	6.77434	3.78605	5.61448	7.28331	5.53039	5.34153	9.27465	9.79623	4.85099	6.04977	6.54891	5.65261	3.84509	3.73243	5.66177	9.20828	7.36495	6.97798	6.79508	6.81711	8.48164	7.28686	3.62529	5.99322	4.20513	5.21807	5.85101	7.97221	7.18191	8.34214	6.33522	5.62306	3.43139	5.30967	4.79537	5.22168	8.34012	12.9198	6.72674	7.55372	5.15388	3.62466	6.86272
SLC25A29	5.8989	5.57266	9.57416	3.1252	7.97137	6.35725	4.99844	3.88759	5.88544	11.9158	4.24061	10.0784	6.98902	5.56183	5.48806	2.30487	2.61148	4.87647	5.08601	3.53519	7.90182	3.93117	6.87521	5.77035	4.47882	8.84009	6.01905	3.06179	4.87024	4.97825	3.25856	2.44887	3.81244	2.63559	4.91388	8.94799	5.97566	3.61764	6.40619	10.799	4.62155	4.20029	3.62327	6.93532	6.49391	6.65384	3.78688	6.11146	8.41854
PPM1A	5.25358	5.28577	6.98431	5.90692	6.50841	5.79896	6.88271	4.61487	7.08487	5.12475	7.96806	6.12575	4.65377	5.96377	4.89638	6.86965	5.47326	6.8994	4.65528	7.46685	5.86494	4.96505	6.95443	7.38726	5.18411	7.13035	5.68835	5.81517	4.75489	5.73818	6.21499	5.39019	5.38909	6.13058	3.86943	4.88171	5.89608	5.16818	5.95546	5.43455	6.18297	5.5071	5.10202	5.35479	5.92089	6.60101	5.79675	4.29334	6.11295
RBP5	9.61586	2.30073	1.01001	5.55239	1.07305	2.1232	1.52693	1.26146	3.38469	6.20284	2.42838	17.6897	1.35502	2.04725	1.52907	4.67732	4.29387	3.51313	1.51592	3.16577	1.90437	0.780722	1.17285	2.57303	1.08175	4.51991	3.05054	3.96769	0.827085	0.895699	3.01746	0.614429	4.71003	1.6227	2.52866	4.06261	1.17527	0.665939	5.38729	2.33886	5.35181	1.1452	1.37339	4.35189	1.12359	1.05994	6.63902	8.20108	2.2296
LIN37	1.20377	0.912749	1.1577	0.955484	1.00633	0.872577	0.852455	0.759362	0.807451	0.948746	0.994363	1.35053	1.09635	1.10766	0.844692	0.845559	0.936355	0.969557	0.9429	0.785505	1.34822	0.96289	0.9964	1.06541	0.697179	1.25899	1.14336	0.759457	0.871587	0.780712	0.677621	0.780121	0.650749	0.701102	0.92344	1.12699	1.0643	0.905205	1.09734	1.74	0.745541	0.870637	0.834682	0.865608	0.865618	1.01687	0.683081	1.28807	0.953291
COL1A2	159.815	30.8502	33.8339	71.301	50.7143	24.7092	68.1737	24.3323	30.8786	137.372	78.0959	70.1624	17.339	54.4049	52.0828	31.3476	91.9205	93.114	55.0849	34.8169	43.918	13.9125	111.684	65.6846	43.7284	55.9416	106.3	49.1761	30.1663	17.3216	61.2481	30.6324	109.415	114.877	58.2377	61.8097	27.444	27.6514	48.5005	59.0796	94.1971	16.6968	16.82	50.9525	17.7476	24.5398	99.0557	56.0825	35.5433
MFSD12	7.90275	6.60412	6.8199	3.10126	5.49167	5.77338	4.945	5.39756	5.60947	6.70128	4.44279	8.98226	16.6901	6.37335	6.81886	2.84318	7.06493	5.13756	5.84584	4.87298	7.32147	13.5812	5.23415	7.19214	9.38195	8.02871	5.62705	3.98791	6.4423	5.27584	5.69802	6.16142	7.07661	6.17145	12.4789	9.23028	5.17742	4.5667	5.6833	7.22601	5.49931	6.90608	7.26735	12.3328	5.16444	6.71076	5.08478	11.489	6.05483
HYAL3	1.09538	0.948165	0.565938	1.3652	0.737915	0.913988	0.855587	0.882128	0.852468	1.29979	0.89451	1.40294	1.13559	0.99827	1.45358	1.50013	0.988127	1.08403	0.966214	1.04068	1.58283	1.27692	0.732289	1.0177	0.865314	1.46146	1.33477	1.43302	1.04444	1.60148	0.855738	1.08052	1.09888	1.93124	1.39391	1.40826	1.079	1.23885	1.00059	0.83738	1.11085	1.32212	1.22659	1.19893	0.903311	0.695731	0.906137	1.038	0.976526
MCM3AP-AS1	0.264708	0.454243	0.520192	0.193934	0.412668	0.442872	0.329841	0.227079	0.372692	0.451226	0.429538	0.800175	0.371186	0.385411	0.417626	0.123302	0.181871	0.372515	0.267201	0.34826	0.561829	0.199415	0.349366	0.476801	0.325668	0.622459	0.292738	0.110196	0.217882	0.333469	0.251268	0.0893351	0.23965	0.0701056	0.19889	0.531459	0.435336	0.179817	0.335694	0.7655	0.259698	0.225599	0.154754	0.228491	0.413315	0.354349	0.24259	0.386444	0.589148
PDLIM2	8.49324	4.24304	6.08928	5.87266	7.5462	9.89069	6.99715	5.73415	7.81762	6.06835	4.13742	5.84461	5.76405	6.75271	5.26163	4.89209	7.3385	7.58656	8.7846	5.50819	6.676	5.86455	5.19681	4.88963	5.70103	8.57059	9.66728	4.08654	8.71879	7.57002	6.2019	5.72977	6.54031	7.55135	9.29966	6.47506	4.31101	8.44848	4.66288	7.79431	7.18202	7.64112	6.62127	4.57883	8.91579	9.0751	6.74547	5.49379	6.98943
CD96	2.19216	3.03881	1.20873	1.58993	1.12409	1.06496	1.42091	1.37867	3.19734	1.37785	1.98675	1.12796	0.93783	1.708	1.91669	1.33913	1.75668	2.84708	1.22683	2.87492	2.33771	0.86229	1.64873	6.56279	1.76365	4.98215	2.00647	2.42944	1.32283	0.725489	1.8874	2.3245	2.95798	1.44962	1.43972	1.75662	1.21897	1.22358	3.53111	2.28772	1.3987	0.954878	0.752247	3.78404	0.516499	2.03265	0.588572	2.63048	1.90023
TTLL11	1.38461	1.32214	2.11871	0.882576	1.54891	1.50964	1.44877	1.00962	1.49547	2.26232	1.43928	1.63948	1.12557	1.29517	0.969924	0.954957	1.2894	1.4444	0.850032	1.26688	1.76181	0.935651	2.0169	1.11369	1.27123	1.8939	1.59834	1.01853	1.0156	1.46635	1.57399	1.07993	1.49693	1.18772	1.12484	1.04563	1.19039	1.44423	1.18177	1.27043	1.89237	1.11294	1.16931	1.01824	1.47566	1.40737	1.37381	1.18634	1.13279
PIGK	5.61695	6.22312	7.13639	8.92607	6.85536	7.16095	7.37487	5.92665	7.17163	7.37974	8.6363	6.84065	5.66168	6.84174	6.58588	9.93335	8.64414	6.90142	4.66234	7.49445	6.52859	5.88685	7.91906	7.91157	6.15979	7.04103	6.94019	10.3819	5.38506	6.15705	6.71313	8.17457	7.25246	9.61039	5.01207	5.58933	7.05483	5.94772	7.60572	5.61179	7.91029	6.27241	7.72164	6.60409	6.2535	8.22833	7.25883	5.79806	6.70485
GAS2	0.676705	0.403074	0.906969	0.458112	0.794693	0.435794	0.365277	0.50893	0.550475	0.370827	0.704481	1.06747	0.304726	0.769936	0.470446	0.402371	0.338487	0.345378	0.349167	0.682274	0.738758	0.433833	0.482063	1.28194	0.448583	0.60363	0.36981	0.307836	0.524316	0.600171	0.45389	0.375867	0.373979	0.434348	0.132559	0.479653	0.473458	0.232503	0.94264	0.624512	0.333985	0.628663	0.333495	0.257923	0.416921	0.763622	0.507405	0.215215	0.539586
MT1A	0.661024	2.59275	1.62332	11.5351	14.2172	0.294338	5.25093	83.2895	2.93321	3.40903	3.6654	6.63538	0.128634	0.767746	2.41761	21.0233	1.27845	7.3291	146.928	31.22	2.25226	7.18712	1.09749	5.03966	2.2601	0.970704	8.26451	0.816807	79.3481	21.7347	2.1513	20.4329	28.9875	9.513	91.2849	5.53709	10.2151	52.272	16.1634	1.19377	1.9052	23.4239	1.88848	8.51218	0.959969	4.46327	12.3322	2.92295	3.41662
SELENBP1	114.148	184.726	95.6847	110.61	102.265	153.427	115.127	123.737	115.443	106.191	101.633	111.278	83.4308	181.42	172.299	110.769	136.63	129.783	98.4149	104.665	147.586	88.8324	137.926	126.625	164.296	103.06	121.808	110.708	109.938	140.583	130.787	130.802	89.7891	55.3402	102.563	175.179	206.037	129.084	102.612	192.868	93.6739	118.12	114.107	158.018	197.065	129.066	116.189	142.103	172.677
TFPI	15.2293	15.8931	20.0599	24.1546	23.6134	12.8282	18.77	26.161	25.4085	10.3127	30.5198	18.2706	9.06782	26.0537	29.2638	21.6617	21.5514	17.8375	29.9223	30.77	23.5636	15.4273	16.0583	26.0877	19.0201	13.2781	14.7297	18.6619	17.6181	29.5457	22.3583	23.9202	21.0139	28.1941	14.0732	14.4944	30.9968	13.2488	25.3251	14.2527	24.5398	30.5024	21.0018	10.6841	17.9983	18.8613	20.6133	22.315	25.849
MMP3	0.424022	0.033074	0.0250054	0.041547	0.0489061	0.0300374	0.0170115	0.0224861	0.00777498	0.511191	0.0705769	0	0.131272	0	0.070491	0.0261639	0.015349	0.128678	0.116111	0.37621	0	0.084629	0.00933331	0.28666	0	0.082551	0.262391	0.166712	0.337116	0.0408229	0.0137214	0.0315938	0.0429613	0.0216941	0.0989816	0.0337352	0.0604324	0.103869	0.0125915	0	0.0155542	0	0.0350402	0.161614	0	0	0.0132475	0.0161237	0.0410199
VAC14	7.42377	7.79991	6.84228	5.28803	5.52678	6.51329	5.39263	4.61017	5.86055	5.79092	6.09184	7.07788	10.4439	6.81698	6.995	3.51247	6.28999	6.49597	4.1245	4.06721	7.206	8.96688	5.76487	6.87676	7.96596	7.33783	6.20379	3.3379	5.67948	5.74139	6.89291	5.41025	6.96351	5.03562	8.98185	8.44419	5.72019	5.99629	5.15686	6.29072	6.01995	6.21924	6.95425	9.34345	6.3597	6.39131	5.52713	7.58503	6.60146
PTGER4	13.1791	14.8006	10.9475	10.7264	9.54986	13.0535	12.8328	10.6962	10.1585	6.41679	12.4143	14.1717	10.7646	7.58341	11.3076	7.09534	9.81692	17.6808	8.19738	8.97205	10.3847	13.2218	10.6552	13.3916	8.25102	13.1376	11.3146	8.56483	9.48208	7.10607	11.8336	9.34379	13.9972	12.1814	9.49541	10.4655	5.11654	7.48793	15.6769	7.80011	7.85717	7.27382	12.6929	19.7831	5.68994	8.33851	15.61	7.25287	9.28246
[truncated: 545 more columns]

## Sheet: Sheet2
FASLG
UBASH3A
ANK1
EIF4ENIF1
SFI1
FGD2
MYLPF
HECTD2
CD248
AGA
2020-03-02
EVI5
AQP4-AS1
SPACA4
ANKMY2
BZW2
CYFIP2
ZNF395
NAP1L5
DOLPP1
PTTG2
MESP1
MRPL15P1
MYO9B
EIF2B1
GTF2H3
CHPT1
SYCP3
C20orf141
TMEM239
INPP4A
AC141586.5
NKX2-5
WHSC1
RGS14
SSRP1
LCK
ETNK2
BAI2
ZNF35
GPATCH2
CHRNE
SMAD1
ENPP1
AC102953.4
MICALL2
MACROD1
BPIFA1
TMEM8A
Z97634.3
RUNX2
CBR1
CNNM1
SLC29A1
HLTF
ISLR
SSUH2
Metazoa_SRP
NOL10
RN7SL832P
ARHGAP9
MARS
2020-03-01
SERPINE1
NEURL1
PCNXL2
GOLGA3
RAMP3
CHMP4B
ZNF341-AS1
SLC25A18
FBXL2
OSR1
MAPK8IP2
GGT1
LRRC40
SRSF11
LYST
MMAB
MVK
RGL2
FAM26D
AACS
PIDD1
RPLP2
GSTM2
LGALS8
MUC15
DAK
DDB1
MSX1
HMGA2
RAD54L
RAMP1
FNDC7
RAI14
TGFB3
ANK2
EMX2
EMX2OS
MORN1
RER1
GDF5
C1orf177
CES2
FAM96B
AC004381.6
CHI3L1
CPXM2
PNOC
FOLR1
CRY1
RP11-797M17.1
HAO2
HAO2-IT1
FMOD
ANAPC2
SSNA1
KLF4
HNRNPH1
CD96
VGF
SMAP1
AL133410.1
SPAG8
CCDC106
CYSTM1
RNF14
HMGB1
USPL1
INTS6
INTS6-AS1
TNKS
CTBP2
LINC00336
LCP1
BGLAP
ZNF501
KCTD4
MBTPS1
GGT6
AC002398.11
LIN37
SPATA12
MOV10
CX3CR1
CSF1R
HLA-DOB
PPARG
VWA5B1
GUF1
RP11-358B23.7
DNMT1
S1PR2
DFNA5
GPR21
C19orf52
YIPF2
PI15
GPR25
C9orf131
C19orf38
TMED1
SP100
RBM18
LZTR1
XXbac-B135H6.18
CELA2A
DCT
CNOT10
MYL4
RWDD2B
TRIM69
P2RX6
TUBA3FP
TM4SF19
TM4SF19-TCTEX1D2
REN
SP110
SP140
AADAC
RSG1
HOXC12
NUPR1
CXCL3
BPGM
GALNT1
C6orf47
LRRC49
THAP10
EGLN3
B4GALT1
MLC1
BCL2L2
BCL2L2-PABPN1
OSGIN1
WDFY3-AS2
TNFSF18
IL1F10
MARK2
GBP6
ZSCAN18
CLCN3
FAM129C
PPAP2B
SDPR
SOX9
SOX9-AS1
PTP4A2
PITPNM2
HNF1A
METTL4
RP11-888D10.3
TWSG1
RAD1
HOXB7
GAS2
SUOX
MIS18A
PEPD
MKL1
AC009955.8
SLC4A3
FAIM3
NR1I2
NR0B2
LRRC46
MRPL10
IVD
HOPX
GRB10
ZNF223
UBXN10
UBXN10-AS1
ATP6V1B1
PTPRN
TGFA
CTD-2083E4.6
PDCD6
RPL9
RPL27
SLC27A6
FTSJ3
PSMC5
POLR2L
TSPAN4
COA4
PAAF1
SLC22A12
CHTF18
RPUSD1
MIR7-3HG
TNP2
AL121987.1
PEA15
FOXA2
RBMS2
ADAD2
EXO1
ADORA2B
CDC20B
MIR449C
SMDT1
CORT
SLC25A35
LAMC1
PSD3
AMOTL2
HRAS
TRAM1L1
PTGER4
TNNC2
MSH3
GJA5
SPARC
FOSL2
MIR4781
TCEANC2
CAMK2N1
GSG1
DCAF6
MPC2
SNX11
CARS
CTSS
TERF2IP
CPD
RAX
CNPY3
CLEC2B
FGF1
C9orf66
DOCK8
CDC42BPB
MIR345
SLC25A29
MEST
MESTIT1_1
SELP
CDK2
PMEL
MT1A
PAPSS1
PRKD3
APITD1
APITD1-CORT
EMC10
FAM71E1
ABCC2
STEAP2
STEAP2-AS1
LYPD6
AKR1D1P1
CD247
C11orf16
CIB3
C11orf72
NDUFV1
RP11-655M14.12
PPARA
ABI2
GIT2
NFIB
GRIA4
HMG20B
MFSD12
BBS5
RP11-724O16.1
WIPF1
VNN2
MTNR1A
RP11-215A19.2
UGDH
UGDH-AS1
CD244
FAXDC2
CLDN9
CCL5
LUM
DDX19A
DDX19B
RP11-529K1.3
SLC15A2
C1QTNF2
KCTD1
OXNAD1
HRH3
SEMA4D
BHMT
EIF2D
C7orf43
TARID
TCF21
LARP4B
TNFSF15
PHB2
MAP4K2
SNHG14
SNORD116-1
DPT
RAB9BP1
CLSTN3
RBP5
RP11-273B20.1
TNFRSF10D
TCHP
FAM57A
CDIPT
CDIPT-AS1
CTD-2574D22.7
AURKB
FOXA1
TTC6
HHEX
NFKBIB
SIRT2
PTK2
DPP4
NXPH4
PRKCE
APOBEC4
TTLL11
ZNF354C
DUOX2
ATP5E
STRA8
MAPK15
SLMAP
TM4SF18
GRIN2D
CLDN16
NACC2
LDB3
TNFSF12
INSL4
COL13A1
C12orf54
CYTIP
ASB5
MGST2
ALOX15B
MBNL1
HOXB9
TMEM17
XIRP1
C9orf116
MRPS2
SLC12A6
GP2
PSPH
CRYAB
KRT4
EML3
ROM1
POGZ
LAPTM5
TAAR6
HOXB3
USP7
ORM1
ATP6V1G3
FLII
ESPN
HES2
VWA2
RNF38
MRPL52
SLC7A7
FBXL22
EGF
APH1B
MRPL43
DNAJB6
RUNX3
CDC23
SLC25A31
DDX28
DUS2
ACOX2
CCDC64
JUP
RP11-460I13.2
FXYD6
FXYD6-FXYD2
IKZF3
GOT2
CHST8
NR3C2
SIVA1
KRBA2
VEPH1
ABHD5
ANO10
MCFD2
TTC7A
TAF11
FBN3
ACAP2
ADAMTSL2
FAM84A
TP53TG5
MITF
ARHGEF11
ALS2CR12
EPB41L5
NRTN
AHSP
ENPP2
C3orf30
IGSF11
RP11-484M3.5
ADRBK1
MED24
LBR
LCN6
RP11-216L13.16
E2F1
MC1R
TUBB3
DMTN
BRDT
SCGB2A2
DHX30
FOXQ1
CDC14A
NABP2
TTPA
HLA-DMA
XXbac-BPG181M17.5
AP002884.2
SDHD
GPR135
TMBIM1
CCDC157
SF3A1
CRHR2
LYZL2
PTPN1
GRHL3
IGLVI-70
ANKRD13C
HHLA3
WBP1L
CHPF
TMEM198
GEMIN2
CLDN14
FAM84B
GALR1
GGT5
FOXD3
FOXD3-AS1
RAD52
C6orf201
FAM217A
CD3G
CTGF
RP11-69I8.3
CXCL17
GSTM4
PHKG2
CEMIP
AQP4
SMAD9
ADIPOR2
MMP3
ADCK4
ITPKC
TMEM56
TMEM56-RWDD3
RDM1
SYNCRIP
IQCF1
BLNK
SGPP2
HYAL3
NAT6
TMEM173
CXCL13
ZNF71
NINJ1
DNAJB1
MIR639
TECR
IHH
BIRC7
SPDEF
SERPINA13P
MT1B
DCLK1
C8orf17
NFAM1
GAD2
ZNF532
MTFR2
NPTX1
GDAP1L1
EVL
TAAR5
KCNC3
NR1H2
ABI3
GNGT2
SMYD5
LGI4
LURAP1L
DDAH2
BCAR3
AC005391.2
ARID3A
SDR16C5
LRP6
AUP1
HTRA2
KLF17
JRK
CYB5R1
SNX21
PIGK
TNS1
ABHD14A
ABHD14A-ACY1
ABHD14B
RP11-155D18.12
C6orf1
RALGPS1
KIF17
ODF3L2
SELENBP1
PRSS3
SYNE4
ARHGEF12
P3H2
P3H2-AS1
TWF2
PTP4A3
GTF3C6
NFXL1
NIPAL1
AC011247.3
EMC1
MRTO4
MYBPH
EGLN1
CTC-321K16.1
CXCL14
IGF2BP3
CLMP
SKP2
RP11-164J13.1
RRAGD
GMPR
SNF8
PCOLCE2
CTD-2631K10.1
TNPO1
NOP14
HLA-DRA
MSANTD3
GFI1B
MIR548AW
TSC1
SPINK7
SCGB3A2
UCP3
NCOA6
RP11-544L8__B.4
LSS
MCM3AP-AS1
APOL6
WNT10A
KLHL21
KLHL5
HLA-DPB1
KLK7
RP11-770J1.3
TMEM25
RNF217
KIZ
C9orf47
S1PR3
NIPSNAP3A
F2
ACCS
PDE5A
ARHGEF2
RP11-336K24.12
APEH
CX3CL1
EEF1G
MAGI2
MAGI2-AS3
B3GNT8
ABAT
MIF4GD
RP11-649A18.12
RAB6B
RP11-138I18.1
MKRN3
ITPR2
MAN2B1
WDR83
KLC2
ANKRD32
CTC-303L1.2
KIAA0825
KIAA1841
BBOX1
VPS72
SLC6A12
GCM1
JDP2
CDH17
USP10
DALRD3
MIR191
NDUFAF3
TUBGCP4
ZSCAN29
CLEC3B
RP3-512B11.3
TRAF1
VTI1A
CCL25
EIF3A
ITM2C
RGS7
C15orf65
CCPG1
CDCA2
KCTD9
LCT
FTH1
RP11-810P12.7
GRK6
HOXC4
RP11-834C11.14
CNTRL
ICAM4
TACC3
TMEM129
SPACA7
HEATR3
GABRP
THBS2
CLCNKB
POT1
PLA2G12B
HSD17B6
TPD52L1
AC000036.4
ACR
BCL11A
OFCC1
SDC4
TXNDC15
AMY2A
ATP2B4
GPR37L1
RETN
DHX38
TNIP2
GON4L
ATP5A1P3
DHODH
DMP1
FAN1
POLR2LP
PSORS1C2
ATM
NPAT
FN1
CRTAM
ZNF85
SPINK2
KRT10
FABP6
ICAM1
SLC20A2
SMIM19
GPNMB
FAM154A
WT1
WT1-AS
WT1-AS_2
WT1-AS_3
CTD-2523D13.2
PVRL1
RASIP1
ARHGAP24
SLC38A2
PCSK1
PACSIN1
IL20
MAP3K6
TRIM55
EMC9
PCCA
RP11-12G12.7
AC007319.1
TFPI
ASTN1
CTD-2184C24.2
PPM1A
E2F2
PSG9
CAMKK1
CTSZ
CATSPER2
PDIA3P2
PDLIM2
SCN4A
LY96
CNOT1
PLD2
RP11-81A22.5
IL32
AMICA1
ELF3
CCT3
TSACC
PRM1
THRB
THRB-AS1
ARL14
RP11-81A22.4
VMO1
HSPA6
DDX51
NOC4L
RANBP3L
CNNM2
FOXA3
SYMPK
PLSCR4
ZBED2
PLA2G5
BNC2
SELPLG
FAM124B
SH2D3C
C1orf27
TPR
VPS37B
ZNF792
NME9
HOMER3
RND1
CYP17A1
CDCP1
TMEM229B
IKBKAP
NUDT3
CELF1
MRPL48
CAHM
QKI
SHH
ASB13
FAM129A
PLOD2
COL1A2
SFXN2
AP000275.65
C21orf59
DNAJC4
VEGFB
CAPZA3
PLCZ1
DDX18
IMPACT
TLR6
CXCL1
RP1-228P16.9
TMEM106C
TAB1
RNF39
MRPS26
CLEC7A
C6orf141
ISLR2
RP11-247C2.2
NETO1
RP11-676J15.1
TIRAP
LRBA
MAB21L2
ARHGAP12
FSBP
RAD54B
APCDD1
METTL7A
SFTPB
PWAR5
RP11-701H24.5
SNORD64
PRSS16
ALDH1A3
GALK1
MRPL49
SLC26A7
ZFAND2A
CCR8
NISCH
TNNC1
MMP20
WSB2
CYP2J2
CLPS
ZBTB5
PPBPP2
CTD-2619J13.3
CTD-2619J13.8
RNA5SP473
ZNF497
CARD11
CHKA
CTD-2655K5.1
SCARB1
PCGF6
EFNB2
FKBP9P1
GLYCTK
WDR82
CAPN9
SHROOM3
TCL1B
USH2A
LDB1
C19orf18
VAC14
MCM3
DAB2IP
