# Supplementary material for: Molecular subtypes based on DNA promoter methylation predict prognosis in lung adenocarcinoma patients
Source: Aging (Albany NY). 2020 Nov 24;12(23):23917–30. doi: 10.18632/aging.104062 (PMC7762488; doi:10.18632/aging.104062)
Supplement: Supplementary Table 4 [file aging-12-104062-s004.xlsx]

## Sheet: Sheet1
Supplementary Table 4. The 61 cluster-specific methylation sites.
id	futime	fustat	cg02273392	cg02829654	cg04109220	cg04228628	cg06493080	cg06640279	cg06731484	cg08578023	cg09357097	cg09450020	cg09829176	cg11476211	cg12167564	cg12370791	cg14201417	cg14833385	cg14847688	cg16983159	cg19224164	cg20557104	cg22975913	cg23696886	cg25167838	cg25300386	cg25580018	cg27650175	cg06911113	cg17178336	cg21487207	cg01282074	cg01818492	cg04770504	cg12370791	cg13828839	cg14896516	cg17178336	cg17775235	cg19042950	cg19219437	cg20591405	cg25167838	cg26937500	cg02273392	cg02829654	cg03476195	cg03699566	cg03764585
TCGA-L9-A5IP	58	1	0.148452	0.101824	0.0427583	0.0101279	0.0320624	0.328062	0.0545637	0.417498	0.0774159	0.0232355	0.201105	0.0535832	0.121842	0.0870551	0.0806572	0.0334958	0.337511	0.480271	0.292268	0.420262	0.058054	0.142364	0.00789026	0.107771	0.0381174	0.437197	0.0879484	0.0509813	0.403926	0.0158571	0.01549	0.130861	0.0870551	0.0313528	0.00688918	0.0509813	0.0621184	0.0307518	0.0545222	0.0103586	0.00789026	0.00614741	0.148452	0.101824	0.292512	0.743628	0.146243
TCGA-78-7161	291	1	0.0650351	0.0644766	0.0464833	0.0086612	0.162441	0.0851901	0.0763687	0.0771246	0.260855	0.00781916	0.0879467	0.0494652	0.0725915	0.0500116	0.0496301	0.0348432	0.0126153	0.0645986	0.134005	0.0764344	0.786557	0.132283	0.0214603	0.215062	0.0817936	0.0405526	0.0516206	0.0925888	0.0528207	0.110416	0.0219566	0.0408059	0.0500116	0.0393851	0.00607533	0.0925888	0.180702	0.11747	0.0622437	0.023582	0.0214603	0.0363974	0.0650351	0.0644766	0.1335	0.813096	0.0631784
TCGA-86-8055	124	1	0.062832	0.118677	0.033081	0.00497573	0.0852443	0.276072	0.0362634	0.0924038	0.0956944	0.0203432	0.213461	0.0324176	0.138876	0.0839455	0.0661943	0.0621029	0.0116917	0.0953244	0.198315	0.14307	0.161705	0.100797	0.0104094	0.0740891	0.088015	0.0505559	0.0664486	0.0357989	0.106884	0.0367854	0.0124288	0.0156348	0.0839455	0.0283987	0.00679603	0.0357989	0.089798	0.0498568	0.06098	0.00328925	0.0104094	0.0074438	0.062832	0.118677	0.310027	0.549557	0.165384
TCGA-55-6979	237	1	0.0635895	0.310282	0.055002	0.019828	0.133259	0.17535	0.0591046	0.150619	0.109561	0.0330452	0.0885835	0.0631915	0.33933	0.1484	0.137046	0.0695484	0.0205604	0.16207	0.255409	0.208221	0.223986	0.0904055	0.0261923	0.0607066	0.0861543	0.0713349	0.0609872	0.0487898	0.384118	0.067389	0.0270008	0.0398636	0.1484	0.0813163	0.0185814	0.0487898	0.115877	0.10762	0.0670914	0.0226415	0.0261923	0.0340564	0.0635895	0.310282	0.34465	0.732591	0.22167
TCGA-50-8457	1125	0	0.0634304	0.155609	0.0400717	0.0179734	0.178354	0.183761	0.0753605	0.15958	0.255603	0.0879657	0.145952	0.0430595	0.185334	0.15354	0.0917381	0.073029	0.0266642	0.176292	0.163714	0.188928	0.388866	0.0928974	0.0514181	0.0762726	0.0971162	0.0633944	0.0805777	0.108868	0.317155	0.08267	0.0210964	0.119654	0.15354	0.111382	0.0321086	0.108868	0.0997267	0.137649	0.0835346	0.0100974	0.0514181	0.042762	0.0634304	0.155609	0.398929	0.388445	0.173728
TCGA-05-5428	670	0	0.0893036	0.0921079	0.0431314	0.0175969	0.440924	0.153478	0.0669018	0.110738	0.492698	0.260087	0.117796	0.0516667	0.102368	0.293066	0.121719	0.0495368	0.0532269	0.0581952	0.114411	0.0963441	0.577323	0.0690331	0.565021	0.0963369	0.208399	0.0867742	0.470331	0.553352	0.591448	0.0882154	0.06386	0.319055	0.293066	0.444453	0.474254	0.553352	0.445376	0.224152	0.0553079	0.190313	0.565021	0.418344	0.0893036	0.0921079	0.548982	0.369977	0.19207
TCGA-50-5935	653	1	0.250074	0.137036	0.0304099	0.0152482	0.282513	0.0950321	0.0454699	0.0912798	0.229394	0.0262805	0.148797	0.0501034	0.187543	0.24426	0.126442	0.0370241	0.021183	0.0772484	0.291459	0.194357	0.584585	0.102457	0.0186338	0.0676572	0.121939	0.0452671	0.0941165	0.0522255	0.132488	0.270081	0.0296221	0.0142479	0.24426	0.0595928	0.0846817	0.0522255	0.170691	0.124578	0.0514947	0.0208946	0.0186338	0.0253272	0.250074	0.137036	0.197895	0.3872	0.196207
TCGA-35-5375	264	0	0.329949	0.171924	0.0365174	0.0121913	0.0801108	0.437026	0.0581726	0.111552	0.0950899	0.015585	0.315206	0.0501975	0.176347	0.051561	0.684782	0.222794	0.258677	0.598667	0.466695	0.645461	0.29601	0.488195	0.0181148	0.0783442	0.637277	0.662049	0.607934	0.0378803	0.224493	0.429981	0.0228591	0.0223656	0.051561	0.0256991	0.139996	0.0378803	0.0770032	0.0469067	0.044581	0.0124263	0.0181148	0.533173	0.329949	0.171924	0.513584	0.807928	0.388352
TCGA-99-8025	1060	0	0.131528	0.121562	0.0584163	0.0119727	0.193563	0.129866	0.0530393	0.0918886	0.296404	0.323592	0.0752264	0.059035	0.114262	0.489964	0.286635	0.0406895	0.0100155	0.0743244	0.0747682	0.0501015	0.617629	0.0781602	0.407346	0.131313	0.127221	0.0396299	0.5619	0.565231	0.571125	0.372981	0.203455	0.466435	0.489964	0.235217	0.49618	0.565231	0.359676	0.260927	0.439841	0.537579	0.407346	0.657492	0.131528	0.121562	0.427956	0.611502	0.243386
TCGA-44-6145	595	0	0.0450867	0.245061	0.0393012	0.015398	0.20465	0.204952	0.058004	0.110807	0.311468	0.0260096	0.082213	0.0510996	0.35628	0.096821	0.130148	0.051624	0.0164718	0.151426	0.424527	0.221738	0.282211	0.0759639	0.0216089	0.0975499	0.0752608	0.0584562	0.537109	0.044194	0.39645	0.0417664	0.0184295	0.0162192	0.096821	0.0854012	0.0136349	0.044194	0.0837191	0.0963218	0.0754359	0.0100812	0.0216089	0.0196176	0.0450867	0.245061	0.221503	0.558205	0.25728
TCGA-86-7954	605	0	0.0719163	0.185836	0.0367216	0.0229666	0.0876409	0.0988377	0.0633262	0.101626	0.103498	0.0187814	0.0761529	0.0479552	0.25049	0.0770056	0.0591483	0.0432426	0.0280918	0.0630439	0.232574	0.140151	0.335413	0.100768	0.0081725	0.0615363	0.0661531	0.0608058	0.0745804	0.0631099	0.105474	0.0887797	0.02404	0.070637	0.0770056	0.0422304	0.0268689	0.0631099	0.0979839	0.0732092	0.0707968	0.0271048	0.0081725	0.034888	0.0719163	0.185836	0.14773	0.525592	0.151693
TCGA-44-2666	97	1	0.385553	0.414052	0.0364239	0.0147219	0.303268	0.18522	0.0670707	0.128963	0.335168	0.0329537	0.0629521	0.0581734	0.397934	0.341033	0.262167	0.0423563	0.0188627	0.0825675	0.0802961	0.0875606	0.518092	0.0983309	0.0146462	0.183597	0.280632	0.0481757	0.326475	0.0583788	0.444624	0.187753	0.0292507	0.347299	0.341033	0.108672	0.226714	0.0583788	0.2208	0.285015	0.0702404	0.0136997	0.0146462	0.031804	0.385553	0.414052	0.36075	0.420744	0.115755
TCGA-97-A4M3	540	0	0.0610918	0.0856713	0.0587142	0.0141206	0.0980813	0.156945	0.065173	0.112555	0.102082	0.0289001	0.135522	0.058467	0.0888546	0.0752508	0.122319	0.050066	0.0262516	0.115264	0.137913	0.105163	0.592068	0.122732	0.0336319	0.110261	0.0806937	0.0473022	0.306993	0.0337565	0.230849	0.266257	0.0301757	0.0279084	0.0752508	0.075813	0.0224158	0.0337565	0.0836004	0.120427	0.074655	0.0273837	0.0336319	0.0514094	0.0610918	0.0856713	0.206884	0.29617	0.0806743
TCGA-05-4424	913	0	0.0740655	0.148007	0.0447327	0.0142101	0.0865065	0.163816	0.0640853	0.112023	0.113936	0.0406678	0.130351	0.0765682	0.208865	0.0865981	0.20898	0.0626105	0.00998128	0.108427	0.278972	0.152918	0.0864433	0.0864719	0.0327017	0.0795681	0.342597	0.0608253	0.0957062	0.0362258	0.123596	0.301108	0.0289259	0.0300551	0.0865981	0.0481789	0.0199081	0.0362258	0.092152	0.0903934	0.108642	0.0313329	0.0327017	0.0252325	0.0740655	0.148007	0.158511	0.694535	0.154534
TCGA-55-6986	3261	0	0.105008	0.178128	0.0541376	0.0132337	0.398005	0.232714	0.0737743	0.147405	0.397584	0.0493184	0.0991496	0.0417429	0.195393	0.44297	0.109142	0.0418341	0.00814452	0.107345	0.175162	0.135033	0.480948	0.073006	0.0271967	0.269856	0.106438	0.0569989	0.455517	0.0655841	0.295642	0.29348	0.0348014	0.031685	0.44297	0.0515767	0.451333	0.0655841	0.30716	0.357982	0.0434732	0.0244369	0.0271967	0.0307069	0.105008	0.178128	0.461888	0.589191	0.159102
TCGA-50-6595	189	1	0.0441428	0.260391	0.0511042	0.00962298	0.10462	0.307261	0.063476	0.15343	0.0879469	0.0245155	0.269857	0.076506	0.329228	0.0943567	0.142572	0.0876227	0.0218881	0.100215	0.223366	0.199762	0.355063	0.0858245	0.0420639	0.131004	0.0849885	0.0598653	0.0624533	0.298392	0.2353	0.081995	0.022131	0.0424609	0.0943567	0.055006	0.0641785	0.298392	0.122575	0.0852093	0.0783429	0.0158877	0.0420639	0.0267892	0.0441428	0.260391	0.29333	0.811611	0.240155
TCGA-MN-A4N1	827	0	0.0397742	0.0664837	0.045528	0.0139247	0.3052	0.181861	0.0527424	0.0840787	0.266623	0.0101579	0.150888	0.0424445	0.0988359	0.447615	0.0686167	0.15435	0.0140139	0.0903322	0.118324	0.089668	0.616963	0.0701823	0.209779	0.0398978	0.0571533	0.0490023	0.135955	0.258387	0.34103	0.190415	0.0196967	0.460623	0.447615	0.0985021	0.363051	0.258387	0.0610042	0.0983617	0.0780242	0.0227135	0.209779	0.566442	0.0397742	0.0664837	0.357066	0.745484	0.130176
TCGA-86-6562	376	1	0.17349	0.100253	0.0480731	0.0170603	0.337306	0.148697	0.075997	0.104235	0.167797	0.0148873	0.238595	0.0368988	0.14837	0.360287	0.0883817	0.0341115	0.0181392	0.0916795	0.193973	0.110438	0.419391	0.115748	0.053637	0.117468	0.0763567	0.0405485	0.0698919	0.0709187	0.0861594	0.0407605	0.0179011	0.0232238	0.360287	0.0594342	0.0145388	0.0709187	0.0974765	0.0877774	0.0729167	0.0125605	0.053637	0.032063	0.17349	0.100253	0.190519	0.696523	0.132224
TCGA-55-6984	760	1	0.11714	0.283909	0.053467	0.0303125	0.257524	0.197229	0.0691327	0.148745	0.217885	0.0499755	0.162135	0.0808023	0.278892	0.258693	0.0991786	0.0710186	0.0296379	0.197281	0.227217	0.181475	0.492933	0.110077	0.0515887	0.371658	0.0992338	0.0651461	0.0952411	0.0810177	0.446738	0.0690546	0.0417436	0.0316602	0.258693	0.10655	0.0390149	0.0810177	0.129768	0.124836	0.103678	0.038673	0.0515887	0.0572188	0.11714	0.283909	0.392222	0.692309	0.193884
TCGA-67-6215	174	0	0.0579914	0.0778025	0.0367272	0.0115664	0.348447	0.0766939	0.0379036	0.101786	0.433177	0.00777913	0.0561863	0.0584718	0.0976672	0.339244	0.11399	0.0537471	0.012184	0.0574101	0.0884965	0.103723	0.679858	0.0616903	0.00675947	0.0592727	0.0788455	0.0404916	0.0688233	0.027517	0.657845	0.0730809	0.0203352	0.0144414	0.339244	0.0857051	0.0281123	0.027517	0.225459	0.157539	0.0663782	0.00053002	0.00675947	0.0371741	0.0579914	0.0778025	0.194655	0.218596	0.104776
TCGA-50-5944	1750	0	0.0422118	0.0691147	0.0322771	0.00922098	0.341749	0.200988	0.0823438	0.116063	0.309248	0.0120877	0.133188	0.0518976	0.0959225	0.0723577	0.0858561	0.0570743	0.00864282	0.0458524	0.0859121	0.103989	0.362797	0.185839	0.00231257	0.10621	0.0778721	0.0520622	0.525291	0.0323207	0.537927	0.0603567	0.0392581	0.0190818	0.0723577	0.0573586	0.0090657	0.0323207	0.0327485	0.0976739	0.0426111	0.00894981	0.00231257	0.011513	0.0422118	0.0691147	0.109893	0.223208	0.0702318
TCGA-78-7542	321	1	0.050296	0.161893	0.0383137	0.0109995	0.139624	0.119386	0.0610029	0.124671	0.337105	0.0153859	0.113432	0.0477353	0.253198	0.395365	0.0931724	0.0389451	0.0102504	0.154769	0.255041	0.195895	0.554852	0.0710842	0.0177314	0.0689815	0.0678425	0.295895	0.0925218	0.471104	0.166661	0.0417137	0.0215344	0.153676	0.395365	0.195385	0.29739	0.471104	0.123912	0.114777	0.155503	0.00889935	0.0177314	0.134355	0.050296	0.161893	0.291877	0.56346	0.155005
TCGA-44-A47G	351	0	0.0857522	0.297816	0.0809863	0.0271994	0.189637	0.179773	0.0678835	0.133733	0.326664	0.0937374	0.124718	0.0797174	0.301403	0.352794	0.168578	0.0879572	0.0282857	0.243244	0.299634	0.207698	0.339951	0.097107	0.0529242	0.170984	0.120371	0.0649369	0.0821928	0.197801	0.287384	0.127976	0.0293236	0.0576427	0.352794	0.124497	0.308274	0.197801	0.295391	0.261437	0.0947136	0.0405862	0.0529242	0.073011	0.0857522	0.297816	0.308445	0.585117	0.256312
TCGA-99-8032	44	0	0.0741548	0.203158	0.0390247	0.0112854	0.0826227	0.215289	0.0700104	0.160368	0.0779532	0.0409765	0.0751049	0.0520681	0.228709	0.0726273	0.0799658	0.0586834	0.00931551	0.216632	0.174031	0.129807	0.38623	0.0794536	0.0176009	0.0680859	0.0683183	0.0501595	0.0737621	0.0550175	0.0790931	0.181914	0.0191879	0.0348328	0.0726273	0.0681451	0.290566	0.0550175	0.0894284	0.0393152	0.0784645	0.0102821	0.0176009	0.165789	0.0741548	0.203158	0.198983	0.609627	0.160653
TCGA-95-7944	377	0	0.0754234	0.255336	0.0301902	0.0149314	0.107694	0.257538	0.0454422	0.118585	0.23129	0.0177488	0.0856377	0.0521217	0.259438	0.223306	0.20006	0.0594644	0.0215007	0.111854	0.163009	0.266638	0.117431	0.0827583	0.0253491	0.127689	0.0944763	0.0782674	0.116528	0.0438044	0.342031	0.0474961	0.0294286	0.0589009	0.223306	0.0499736	0.0218243	0.0438044	0.151177	0.0689613	0.0662348	0.0223306	0.0253491	0.0349732	0.0754234	0.255336	0.192599	0.610497	0.221044
TCGA-69-7973	230	0	0.0511342	0.0801661	0.0535969	0.0189856	0.10425	0.109491	0.0365306	0.122094	0.0867241	0.0157233	0.0872046	0.051238	0.115083	0.0560586	0.0772904	0.0605269	0.0169326	0.0996775	0.219653	0.0933547	0.569383	0.109196	0.0165889	0.0670958	0.0729377	0.0414768	0.0652341	0.0443333	0.0637122	0.054736	0.0280037	0.0291714	0.0560586	0.050277	0.192463	0.0443333	0.0873343	0.0676426	0.0630218	0.0251678	0.0165889	0.0307159	0.0511342	0.0801661	0.0806959	0.791315	0.0997059
TCGA-44-7672	719	0	0.121334	0.272825	0.0511161	0.0187534	0.323015	0.214397	0.0696493	0.13005	0.38963	0.0854812	0.175905	0.0643701	0.306418	0.356072	0.150576	0.0872615	0.0123589	0.396916	0.322592	0.311487	0.440121	0.111071	0.0333131	0.139003	0.124307	0.0512103	0.497473	0.189558	0.239914	0.132867	0.030387	0.19894	0.356072	0.0679319	0.137285	0.189558	0.127368	0.129095	0.132202	0.0215647	0.0333131	0.337168	0.121334	0.272825	0.399151	0.727493	0.299376
TCGA-97-A4M1	601	0	0.0305983	0.0865126	0.03597	0.00202699	0.0653862	0.193488	0.0444135	0.0999895	0.132643	0.0122652	0.090825	0.0496934	0.0991864	0.228961	0.043521	0.0305338	0.0136652	0.0416776	0.103387	0.0958234	0.253792	0.117227	0.0119882	0.0546504	0.0559103	0.0352861	0.105769	0.0268875	0.132583	0.057075	0.0158156	0.0168578	0.228961	0.0420481	0.0126901	0.0268875	0.0544761	0.0873269	0.0640197	0.0128906	0.0119882	0.134566	0.0305983	0.0865126	0.227092	0.31795	0.134872
TCGA-69-7764	414	0	0.0894562	0.117148	0.0557707	0.014347	0.195539	0.125797	0.0702148	0.119041	0.298592	0.0377251	0.0882098	0.0489606	0.15496	0.110018	0.0908036	0.0480028	0.0226662	0.124793	0.136652	0.144047	0.156043	0.100622	0.0260742	0.0667522	0.0630622	0.065878	0.476192	0.0843821	0.329772	0.0588679	0.0319302	0.022264	0.110018	0.0785369	0.0227501	0.0843821	0.0801613	0.069628	0.0849538	0.0184243	0.0260742	0.0413338	0.0894562	0.117148	0.202538	0.292966	0.088056
TCGA-44-5643	1013	0	0.0404353	0.552731	0.0326384	0.0149785	0.102098	0.446447	0.0543307	0.127834	0.0924077	0.0155405	0.130205	0.0500307	0.462855	0.0536481	0.0601902	0.0415886	0.0149067	0.316034	0.269917	0.159524	0.561231	0.162181	0.0131666	0.0532453	0.055929	0.0440377	0.560192	0.0226705	0.0913234	0.0476489	0.0212362	0.0145341	0.0536481	0.0573479	0.14345	0.0226705	0.0603134	0.0570026	0.0483624	0.0122891	0.0131666	0.115233	0.0404353	0.552731	0.220058	0.773836	0.306237
TCGA-55-7995	889	0	0.164799	0.196513	0.03169	0.0190197	0.0968203	0.086679	0.0536953	0.0915076	0.0850086	0.0187231	0.113886	0.05111	0.233668	0.0377763	0.287465	0.0349962	0.0193815	0.18108	0.306183	0.144392	0.0363221	0.114481	0.0116988	0.0369353	0.313536	0.0521025	0.571195	0.0380334	0.0993684	0.0794644	0.0351423	0.0217936	0.0377763	0.0719709	0.00682143	0.0380334	0.0747516	0.0604556	0.0659013	0.00950188	0.0116988	0.0310805	0.164799	0.196513	0.365829	0.78457	0.169255
TCGA-44-A4SS	415	0	0.0571147	0.300178	0.0422758	0.0151121	0.0919663	0.28826	0.059277	0.105373	0.080039	0.0229117	0.0998502	0.0603579	0.310453	0.0788672	0.135321	0.065769	0.12355	0.0728752	0.294484	0.197738	0.130959	0.0706596	0.0518914	0.347262	0.0779457	0.0465101	0.429792	0.0697731	0.141407	0.0465639	0.0208324	0.0264561	0.0788672	0.0381213	0.0247775	0.0697731	0.132084	0.104777	0.0606229	0.0161397	0.0518914	0.0392871	0.0571147	0.300178	0.43279	0.719115	0.251555
TCGA-78-7150	666	1	0.408011	0.536295	0.0631993	0.0254212	0.0942189	0.466975	0.0524682	0.440494	0.0702561	0.00999486	0.130183	0.0394914	0.494879	0.0474936	0.158226	0.0477733	0.0247493	0.460248	0.499013	0.515535	0.0730267	0.13231	0.018001	0.29792	0.0907842	0.615013	0.0688767	0.0225807	0.0423541	0.0654902	0.0204379	0.0141599	0.0474936	0.0483312	0.00852124	0.0225807	0.052743	0.0458609	0.0426152	0.0257391	0.018001	0.0242095	0.408011	0.536295	0.338673	0.716783	0.141088
TCGA-86-8669	938	0	0.047144	0.147596	0.0354768	0.0127102	0.0983684	0.0804765	0.0447745	0.131059	0.211332	0.0640129	0.058809	0.0509016	0.17832	0.246143	0.0745259	0.0559887	0.0268791	0.283398	0.237985	0.210755	0.494313	0.0986206	0.0383389	0.0533653	0.0739382	0.0556437	0.0629191	0.144528	0.123139	0.0534096	0.0272794	0.0209905	0.246143	0.102634	0.0257683	0.144528	0.103954	0.0623984	0.0881437	0.0358268	0.0383389	0.26346	0.047144	0.147596	0.175013	0.317172	0.129901
TCGA-55-8094	541	0	0.0553858	0.0940586	0.0444221	0.0116027	0.162421	0.0769053	0.068486	0.294532	0.361263	0.0131238	0.479343	0.479039	0.0967682	0.365861	0.0566846	0.0506516	0.0039789	0.416022	0.635129	0.815925	0.441183	0.279046	0.0111631	0.0464606	0.0567941	0.0948729	0.0712857	0.0135662	0.0468804	0.034702	0.0211035	0.345971	0.365861	0.14544	0.555894	0.0135662	0.0865604	0.0457558	0.04401	0.0193342	0.0111631	0.078126	0.0553858	0.0940586	0.176384	0.374292	0.0948298
TCGA-78-7163	7248	0	0.0403668	0.127436	0.0446719	0.00355186	0.100452	0.0893951	0.0505237	0.104623	0.423564	0.0420353	0.0731135	0.0445141	0.135333	0.0830315	0.0537094	0.054801	0.0135077	0.0721192	0.0851335	0.11407	0.339767	0.0774843	0.0192726	0.0833994	0.072914	0.0510251	0.0546194	0.0562983	0.165935	0.0305845	0.0228439	0.015625	0.0830315	0.0414887	0.0213932	0.0562983	0.177245	0.0841936	0.0759293	0.0153715	0.0192726	0.0118123	0.0403668	0.127436	0.109799	0.365588	0.121407
TCGA-78-8640	7062	0	0.40857	0.405801	0.0416244	0.0140586	0.070421	0.27716	0.0365489	0.207009	0.0823798	0.0117883	0.172938	0.0341023	0.287673	0.0878411	0.112733	0.0548902	0.481533	0.202465	0.176823	0.5475	0.0748543	0.184586	0.0106898	0.221511	0.0918302	0.544036	0.0914695	0.0694195	0.104236	0.326569	0.0241392	0.359952	0.0878411	0.0372886	0.0288889	0.0694195	0.0759502	0.0800746	0.0505827	0.0168261	0.0106898	0.436102	0.40857	0.405801	0.375229	0.675148	0.260611
TCGA-MP-A4TA	950	1	0.0845938	0.390188	0.0403618	0.0141009	0.0584995	0.143579	0.0388426	0.218862	0.0477221	0.00966957	0.0744865	0.0448315	0.336253	0.0433719	0.0737462	0.0565719	0.346063	0.241426	0.132919	0.286445	0.0600013	0.0424505	0.0117555	0.104589	0.0627795	0.0761863	0.065836	0.0560498	0.0784486	0.0229888	0.0109937	0.02231	0.0433719	0.0602983	0.0610031	0.0560498	0.0622401	0.0715564	0.0529901	0.018095	0.0117555	0.0408868	0.0845938	0.390188	0.243705	0.74089	0.171061
TCGA-55-6982	995	1	0.0698026	0.141938	0.0543586	0.0136802	0.345167	0.310966	0.0723688	0.102113	0.34227	0.0155582	0.161463	0.0319924	0.151584	0.0551856	0.0810644	0.117774	0.013155	0.136919	0.258632	0.159057	0.332791	0.0559025	0.0199734	0.327869	0.0985018	0.0671807	0.0864707	0.0419121	0.12185	0.051382	0.0159103	0.0151202	0.0551856	0.0247998	0.0474404	0.0419121	0.0702965	0.0859679	0.0436896	0.0194587	0.0199734	0.291391	0.0698026	0.141938	0.403416	0.473569	0.237061
TCGA-50-5942	1847	0	0.0997225	0.10992	0.053538	0.0143455	0.175638	0.164179	0.0617159	0.087563	0.351614	0.0182562	0.125693	0.0469511	0.119472	0.371725	0.0761996	0.0602143	0.0185895	0.087706	0.144586	0.119819	0.343674	0.082237	0.0135054	0.0870725	0.0711026	0.0767981	0.501221	0.0202346	0.428952	0.152163	0.0192008	0.0421514	0.371725	0.0658173	0.143825	0.0202346	0.137282	0.169888	0.0676831	0.0155595	0.0135054	0.120916	0.0997225	0.10992	0.239733	0.260187	0.132236
TCGA-55-8085	904	0	0.0488907	0.145369	0.0284116	0.0139806	0.114565	0.0703164	0.0533908	0.0579528	0.328257	0.0161186	0.0561196	0.0398295	0.149032	0.061865	0.0626227	0.039084	0.00903136	0.0932878	0.140589	0.195867	0.541962	0.0665959	0.015926	0.0452034	0.0670182	0.0480527	0.0941833	0.0507386	0.198048	0.0357204	0.0165894	0.0173215	0.061865	0.0391413	0.0180744	0.0507386	0.0679044	0.0476937	0.0526269	0.00290098	0.015926	0.00798128	0.0488907	0.145369	0.126155	0.351611	0.143198
TCGA-97-A4M7	629	0	0.0462974	0.215008	0.0437458	0.00866969	0.196034	0.184338	0.0559939	0.125187	0.230236	0.0235349	0.105928	0.0454313	0.266232	0.310984	0.118491	0.0545203	0.0116945	0.115517	0.164523	0.139776	0.454126	0.0749526	0.0199201	0.0667612	0.0739808	0.0584264	0.466564	0.0718017	0.235718	0.0620817	0.024146	0.385834	0.310984	0.0655806	0.131209	0.0718017	0.104949	0.0884535	0.0637078	0.0218227	0.0199201	0.00871689	0.0462974	0.215008	0.29435	0.438125	0.18515
TCGA-78-7146	173	1	0.0532521	0.106567	0.0430452	0.0239504	0.121542	0.134095	0.0685944	0.126307	0.104819	0.0249649	0.269894	0.0562106	0.157006	0.08894	0.253914	0.0578548	0.392699	0.0596832	0.348937	0.730249	0.150483	0.0592236	0.0365585	0.185611	0.0781513	0.0662445	0.0644672	0.0617492	0.385406	0.0494119	0.0288488	0.0214181	0.08894	0.0622067	0.0187203	0.0617492	0.0935154	0.0571676	0.0463222	0.011358	0.0365585	0.0367034	0.0532521	0.106567	0.680508	0.583543	0.531046
TCGA-62-8394	139	1	0.0535076	0.15705	0.0333669	0.017399	0.0693175	0.138157	0.048721	0.0995722	0.0802052	0.014193	0.13345	0.0491863	0.186892	0.0368485	0.0651096	0.0345284	0.0286185	0.0754299	0.187761	0.203738	0.546767	0.056727	0.00884478	0.0911562	0.0621056	0.0757452	0.0874779	0.0200239	0.0584939	0.040573	0.0252995	0.00923966	0.0368485	0.0409435	0.00604079	0.0200239	0.0929175	0.0662876	0.0498087	0.0112177	0.00884478	0.0254746	0.0535076	0.15705	0.187136	0.412705	0.117131
TCGA-L4-A4E5	578	0	0.244644	0.122595	0.0455108	0.00751232	0.168156	0.116496	0.0386057	0.125349	0.588231	0.0412595	0.124126	0.0388453	0.149899	0.512867	0.0616912	0.0770118	0.0314876	0.134149	0.209343	0.186773	0.523423	0.0820222	0.336025	0.0554826	0.0779884	0.0314992	0.379557	0.049371	0.382862	0.103424	0.0296105	0.0319125	0.512867	0.0596135	0.016507	0.049371	0.0703414	0.110572	0.0908897	0.0282588	0.336025	0.165284	0.244644	0.122595	0.159248	0.712233	0.182074
TCGA-50-8460	829	0	0.0529205	0.155291	0.0443431	0.0159183	0.260902	0.160953	0.0947058	0.126889	0.20442	0.0263783	0.0879275	0.0522607	0.222434	0.332113	0.0861374	0.072787	0.0407969	0.13447	0.225326	0.199264	0.522215	0.0768408	0.0952476	0.0923786	0.0969408	0.067148	0.0756004	0.0657239	0.23031	0.237627	0.0418829	0.0267361	0.332113	0.0904453	0.0668922	0.0657239	0.27052	0.15195	0.089204	0.038246	0.0952476	0.040724	0.0529205	0.155291	0.2236	0.431068	0.149465
TCGA-S2-AA1A	513	0	0.0938743	0.203567	0.0409073	0.00667138	0.0468653	0.123472	0.0456774	0.0754988	0.243783	0.0511545	0.0563822	0.0699683	0.228832	0.196292	0.0816684	0.0541931	0.0101896	0.153275	0.202374	0.15938	0.282619	0.0969436	0.0249705	0.0510989	0.039851	0.0320405	0.0472336	0.0779308	0.244801	0.0472236	0.0162047	0.0132461	0.196292	0.062112	0.347208	0.0779308	0.0403529	0.150519	0.0586077	0.0038226	0.0249705	0.00979123	0.0938743	0.203567	0.19348	0.612887	0.18098
TCGA-44-6774	658	0	0.0499066	0.16255	0.0351426	0.00672726	0.0756537	0.314694	0.0438094	0.175729	0.128957	0.0169389	0.185284	0.0488913	0.219606	0.0865017	0.124771	0.164494	0.0108615	0.148653	0.182936	0.145045	0.376277	0.0911002	0.0259824	0.0644781	0.0712762	0.0366653	0.123366	0.0413131	0.121587	0.0829708	0.0251256	0.00768353	0.0865017	0.0259447	0.0136613	0.0413131	0.08613	0.0722905	0.0522477	0.0188666	0.0259824	0.0165026	0.0499066	0.16255	0.178376	0.683942	0.19917
TCGA-MP-A4T8	161	1	0.058638	0.0582938	0.0274721	0.0126287	0.107736	0.258144	0.0508515	0.191799	0.275231	0.0165973	0.0991259	0.0322575	0.0884931	0.100289	0.0715564	0.0501791	0.00607561	0.111447	0.112775	0.383747	0.625035	0.122068	0.126993	0.0601588	0.0645801	0.240656	0.0894791	0.0668654	0.191566	0.0547884	0.0198037	0.0423621	0.100289	0.0353678	0.053783	0.0668654	0.0730479	0.0626167	0.054233	0.0176239	0.126993	0.0618504	0.058638	0.0582938	0.242298	0.507175	0.162785
TCGA-86-7701	947	0	0.101	0.176704	0.0469733	0.0197664	0.0884664	0.099872	0.0616967	0.133519	0.0840281	0.105423	0.0954831	0.0658024	0.18823	0.0888828	0.0870597	0.0590328	0.0327973	0.165593	0.235753	0.194522	0.429806	0.107981	0.313668	0.0652324	0.0849467	0.0611901	0.0917897	0.228155	0.259562	0.0728371	0.0215844	0.0489929	0.0888828	0.0971796	0.396012	0.228155	0.0910455	0.0587252	0.105388	0.0299092	0.313668	0.0378401	0.101	0.176704	0.20479	0.644957	0.147169
TCGA-MP-A5C7	2248	0	0.0435841	0.0516296	0.0338831	0.0116583	0.176476	0.0708029	0.0407731	0.0705626	0.326457	0.0112958	0.0569127	0.0457804	0.0627248	0.45295	0.0270751	0.0458511	0.0173972	0.0972337	0.058547	0.0996472	0.498551	0.0874173	0.0221275	0.0428818	0.0459295	0.0332073	0.357672	0.0316592	0.403951	0.055936	0.0279744	0.34321	0.45295	0.0109332	0.0022255	0.0316592	0.0384006	0.0567992	0.0601397	0.00688489	0.0221275	0.034031	0.0435841	0.0516296	0.0785656	0.151832	0.0252084
TCGA-55-8206	888	0	0.081588	0.124427	0.0366587	0.00605543	0.06512	0.155214	0.0530364	0.13715	0.0950139	0.0182746	0.105182	0.0409324	0.12819	0.112687	0.0512087	0.0458319	0.00526415	0.0661737	0.165038	0.0947403	0.267279	0.125428	0.00710059	0.0777249	0.0475395	0.0532631	0.0689519	0.0241374	0.149846	0.12442	0.00586694	0.0101998	0.112687	0.0312043	0.0137824	0.0241374	0.0757236	0.101934	0.0547071	0.0105239	0.00710059	0.0295949	0.081588	0.124427	0.293807	0.345702	0.0799592
TCGA-NJ-A4YP	50	0	0.0973461	0.161614	0.0630183	0.0178176	0.116913	0.174349	0.0651858	0.158825	0.306338	0.0280116	0.150089	0.217177	0.138634	0.345393	0.121859	0.0777795	0.0476876	0.086045	0.158142	0.238488	0.505568	0.148611	0.150673	0.395847	0.0658219	0.439671	0.558352	0.286985	0.376708	0.0925611	0.0179277	0.398487	0.345393	0.0760537	0.245751	0.286985	0.188361	0.0961019	0.0809513	0.0410576	0.150673	0.0639876	0.0973461	0.161614	0.377971	0.457543	0.112585
TCGA-78-7535	949	1	0.0603892	0.0699615	0.0478574	0.00985019	0.522538	0.0849388	0.0778957	0.135863	0.58938	0.00817605	0.0746226	0.0555328	0.0686729	0.590202	0.0904562	0.0340521	0.0194548	0.0604872	0.0578734	0.0500156	0.667289	0.0885941	0.348371	0.327263	0.140737	0.0517622	0.0786432	0.389133	0.662177	0.208298	0.0214179	0.031096	0.590202	0.0381618	0.456533	0.389133	0.0913306	0.128561	0.061785	0.017505	0.348371	0.0327768	0.0603892	0.0699615	0.47057	0.387093	0.114153
TCGA-50-5055	1830	1	0.0524167	0.30997	0.0383507	0.0240178	0.14959	0.189815	0.054795	0.133947	0.258995	0.0553306	0.066817	0.0548051	0.365244	0.171707	0.104573	0.0661932	0.0254293	0.257857	0.2541	0.254189	0.262973	0.0820678	0.0393451	0.097029	0.0761579	0.0464716	0.0797265	0.11197	0.265448	0.0454209	0.0225402	0.0272064	0.171707	0.0426632	0.0489234	0.11197	0.0910508	0.145981	0.106653	0.0170073	0.0393451	0.0384206	0.0524167	0.30997	0.285167	0.626904	0.280612
TCGA-78-7167	2681	1	0.0432109	0.0914769	0.0525003	0.0201733	0.286163	0.102087	0.0548558	0.0926553	0.382783	0.00751271	0.0954491	0.0541501	0.0761993	0.0588691	0.0639715	0.0571715	0.0210139	0.0718613	0.0892174	0.0823258	0.674201	0.0865059	0.0526888	0.0593558	0.0908099	0.0629658	0.0816602	0.0677366	0.135597	0.0572594	0.0388325	0.0188233	0.0588691	0.0256192	0.0174464	0.0677366	0.118282	0.0755421	0.066966	0.0146164	0.0526888	0.0163185	0.0432109	0.0914769	0.072939	0.184408	0.0452286
TCGA-99-8028	1118	0	0.138532	0.201317	0.0399237	0.0140327	0.1343	0.156385	0.0454865	0.1197	0.290896	0.0439932	0.104894	0.0493594	0.285562	0.0857015	0.161146	0.0436933	0.0142943	0.177797	0.204448	0.225007	0.316414	0.0818505	0.0514573	0.0684723	0.060672	0.0531577	0.0903657	0.079733	0.225384	0.153683	0.0158225	0.0701516	0.0857015	0.0748606	0.0367736	0.079733	0.0664685	0.136875	0.0771732	0.021286	0.0514573	0.125382	0.138532	0.201317	0.287683	0.603915	0.306075
TCGA-L9-A7SV	565	0	0.179239	0.128162	0.0368766	0.0178097	0.214256	0.0678841	0.098815	0.343511	0.399391	0.232349	0.0804548	0.0435718	0.159513	0.188959	0.0691216	0.0608109	0.0327773	0.129744	0.101425	0.0786351	0.106437	0.158297	0.171163	0.0766671	0.0600915	0.0507794	0.147703	0.144861	0.136372	0.145579	0.0399742	0.475336	0.188959	0.0305931	0.0181035	0.144861	0.110107	0.429066	0.0658832	0.0124411	0.171163	0.334042	0.179239	0.128162	0.115605	0.0808992	0.0768724
TCGA-44-6148	704	0	0.0679247	0.0921407	0.0593285	0.0190714	0.102037	0.225819	0.0697088	0.101289	0.244598	0.0391064	0.155193	0.0684301	0.104741	0.230875	0.0786137	0.0821774	0.00132883	0.211751	0.118262	0.142911	0.400076	0.0948268	0.0343401	0.0655707	0.0787398	0.0479545	0.0854498	0.0689502	0.177343	0.0381242	0.0209881	0.0250792	0.230875	0.056775	0.0204498	0.0689502	0.0967427	0.0943607	0.0703467	0.0319744	0.0343401	0.0330314	0.0679247	0.0921407	0.112028	0.234411	0.0886205
TCGA-97-8179	435	0	0.0460364	0.0587106	0.03898	0.00970295	0.125377	0.169325	0.0361339	0.0890952	0.138678	0.0249284	0.116429	0.0720418	0.0798656	0.352659	0.0419907	0.0384679	0.00556546	0.0605103	0.0884365	0.119867	0.208832	0.0968481	0.0221954	0.404485	0.346565	0.0522136	0.0826276	0.0257216	0.26849	0.0663348	0.0206049	0.454097	0.352659	0.0301624	0.459699	0.0257216	0.107306	0.358726	0.0548721	0.02035	0.0221954	0.0314139	0.0460364	0.0587106	0.105217	0.314252	0.141463
TCGA-62-A46Y	414	1	0.0496991	0.210248	0.0723972	0.0218571	0.305854	0.144813	0.041912	0.14514	0.48657	0.0431767	0.136911	0.0734219	0.259555	0.55241	0.0968602	0.0627803	0.0312069	0.0871406	0.2171	0.173467	0.554845	0.0725279	0.0402379	0.0879849	0.104352	0.0574131	0.0949964	0.0702896	0.443007	0.154551	0.0395027	0.0531907	0.55241	0.131687	0.0512499	0.0702896	0.49031	0.145181	0.0839321	0.0513792	0.0402379	0.0932509	0.0496991	0.210248	0.215831	0.472092	0.249638
TCGA-05-5425	882	0	0.0515519	0.30105	0.0367381	0.0127635	0.0921429	0.206972	0.0543402	0.116504	0.209225	0.0189583	0.117636	0.0494413	0.330532	0.072317	0.0544018	0.043371	0.0337976	0.23393	0.36976	0.125598	0.42067	0.0590149	0.0430962	0.0748578	0.0714178	0.0398261	0.0773361	0.0715881	0.109026	0.0835641	0.0263008	0.0106972	0.072317	0.0393768	0.0193594	0.0715881	0.0796747	0.039939	0.0493176	0.0078253	0.0430962	0.0196909	0.0515519	0.30105	0.212266	0.495975	0.184568
TCGA-86-6851	179	0	0.0853996	0.32348	0.0422919	0.0140515	0.189167	0.10368	0.0705739	0.0988712	0.0882741	0.0488171	0.0924609	0.0756152	0.325916	0.0457256	0.147553	0.0514411	0.0212305	0.225159	0.166759	0.322405	0.33681	0.105333	0.0579066	0.0801915	0.102187	0.0520852	0.54938	0.102396	0.266544	0.054768	0.0872729	0.0220754	0.0457256	0.0560657	0.0866148	0.102396	0.102881	0.159177	0.107929	0.0262661	0.0579066	0.03731	0.0853996	0.32348	0.26589	0.452837	0.213045
TCGA-93-A4JN	718	0	0.0401761	0.241095	0.0466419	0.00586147	0.38767	0.202783	0.0439259	0.142107	0.311575	0.107375	0.0991375	0.0391769	0.219296	0.0757899	0.0610682	0.251283	0.00754828	0.145565	0.0920024	0.145562	0.479232	0.0691618	0.0235204	0.0548073	0.0620307	0.0261693	0.471009	0.0669856	0.200395	0.118126	0.0214477	0.0141402	0.0757899	0.0597452	0.0744675	0.0669856	0.0838078	0.429229	0.0448913	0.0213006	0.0235204	0.381155	0.0401761	0.241095	0.36229	0.644723	0.115444
TCGA-44-4112	808	1	0.0953329	0.214365	0.0847751	0.0221786	0.171229	0.21147	0.0898807	0.069369	0.198014	0.030912	0.131158	0.0654531	0.210861	0.288637	0.144273	0.110119	0.0232973	0.116431	0.132276	0.155934	0.405127	0.0889789	0.026132	0.101881	0.0926547	0.045693	0.335086	0.268527	0.307853	0.13521	0.0441413	0.0363743	0.288637	0.0888205	0.0517582	0.268527	0.116637	0.132634	0.070899	0.0169927	0.026132	-0.00367676	0.0953329	0.214365	0.233901	0.44617	0.208083
TCGA-05-4384	426	0	0.038124	0.107367	0.05366	0.0225201	0.300161	0.172304	0.0560336	0.128105	0.463406	0.0113526	0.119291	0.0611603	0.153733	0.106262	0.104091	0.0646581	0.0371816	0.0749945	0.110217	0.128551	0.11734	0.0838146	0.0153092	0.0454357	0.0606657	0.0875451	0.0731364	0.0394898	0.208281	0.0649369	0.0277092	0.0152149	0.106262	0.0475987	0.0259148	0.0394898	0.0842903	0.0795366	0.0854725	0.0160888	0.0153092	0.0410916	0.038124	0.107367	0.0971867	0.429818	0.112929
TCGA-86-8280	701	0	0.0662149	0.170809	0.047395	0.0120742	0.0673625	0.164101	0.0634853	0.124757	0.0939402	0.0979302	0.100628	0.0571758	0.195189	0.0824669	0.0807344	0.0513035	0.0306857	0.130042	0.163727	0.152323	0.0874959	0.120035	0.0394854	0.071685	0.082927	0.0685849	0.0954047	0.106438	0.201885	0.0511417	0.0308012	0.041859	0.0824669	0.0509323	0.0104867	0.106438	0.0962497	0.0966732	0.0664622	0.0210531	0.0394854	0.0618347	0.0662149	0.170809	0.164457	0.428623	0.163415
TCGA-86-8674	806	0	0.0680952	0.132898	0.050196	0.00460799	0.0634208	0.118302	0.0651165	0.133121	0.0843231	0.0420783	0.110317	0.0498295	0.151839	0.0844835	0.0962756	0.0785069	0.0213311	0.092637	0.101747	0.272396	0.0930732	0.0825204	0.0287927	0.0649761	0.0805895	0.295943	0.0814402	0.0487409	0.086903	0.048837	0.0285624	0.0198065	0.0844835	0.0579606	0.0197846	0.0487409	0.0850008	0.0809108	0.0606543	0.016786	0.0287927	0.0776038	0.0680952	0.132898	0.178702	0.415817	0.0989794
TCGA-91-6840	372	0	0.0441369	0.0958174	0.0307984	0.0161142	0.0984855	0.122697	0.0552969	0.117925	0.0910057	0.0194695	0.111661	0.0524381	0.227374	0.0639693	0.071224	0.0354958	0.00946782	0.366474	0.3032	0.118352	0.114304	0.224724	0.0246677	0.0532372	0.131109	0.0599301	0.0716713	0.0421711	0.0822128	0.115832	0.0269819	0.019238	0.0639693	0.0491708	0.0146711	0.0421711	0.075945	0.0630931	0.0597515	0.0189126	0.0246677	0.0422363	0.0441369	0.0958174	0.10787	0.321883	0.134254
TCGA-50-5066	1442	0	0.0686551	0.130423	0.0618015	0.0118736	0.296342	0.17676	0.0586686	0.129138	0.308478	0.0557703	0.209531	0.049525	0.168699	0.313572	0.0913966	0.0493995	0.0216805	0.195023	0.194381	0.119398	0.42904	0.144609	0.0350404	0.103727	0.109186	0.0399645	0.115708	0.0695884	0.401405	0.0592481	0.0323195	0.0229741	0.313572	0.0591702	0.0301426	0.0695884	0.0873375	0.0572236	0.0670661	0.0336454	0.0350404	0.0265655	0.0686551	0.130423	0.215327	0.567502	0.196486
TCGA-MP-A4TC	74	1	0.0514819	0.162988	0.0353463	0.0113178	0.240347	0.262591	0.0470582	0.111298	0.296292	0.0148733	0.0959696	0.0419331	0.242883	0.419516	0.0865832	0.0543755	0.0172777	0.0701165	0.0986173	0.107282	0.309844	0.0643969	0.0217671	0.1035	0.073368	0.0384089	0.0764524	0.167437	0.373072	0.0771505	0.019911	0.016063	0.419516	0.0592144	0.0762454	0.167437	0.104392	0.211323	0.0559303	0.024846	0.0217671	0.0225125	0.0514819	0.162988	0.317142	0.732032	0.166818
TCGA-55-A57B	546	0	0.215871	0.210095	0.0360064	0.00863682	0.260504	0.241976	0.0328388	0.112415	0.448389	0.00685555	0.409575	0.0970911	0.166082	0.0831091	0.0998198	0.053219	0.262489	0.0586037	0.247958	0.16871	0.41775	0.119294	0.428946	0.391468	0.0740305	0.103001	0.521622	0.305192	0.375596	0.0495306	0.0720626	0.415115	0.0831091	0.306167	0.0162892	0.305192	0.378973	0.26846	0.295564	0.00296466	0.428946	0.252721	0.215871	0.210095	0.425607	0.356187	0.217127
TCGA-62-A472	910	0	0.0536017	0.199334	0.0533795	0.0229263	0.546985	0.149663	0.071358	0.152962	0.428463	0.0491431	0.16437	0.0764974	0.215515	0.54178	0.122906	0.0607905	0.0369109	0.093872	0.206992	0.239776	0.59726	0.0849488	0.0391984	0.0700929	0.0867639	0.0874628	0.0924877	0.52791	0.582479	0.275556	0.030774	0.416407	0.54178	0.337383	0.492405	0.52791	0.435859	0.457921	0.312538	0.0372229	0.0391984	0.514435	0.0536017	0.199334	0.223168	0.503906	0.179576
TCGA-4B-A93V	300	1	0.0478799	0.064956	0.0434977	0.00370457	0.0717284	0.0773185	0.0536937	0.068259	0.0910752	0.0147285	0.050762	0.0522655	0.107559	0.108667	0.137727	0.0459448	0.00423525	0.154175	0.0939829	0.119723	0.0893009	0.0813213	0.0136298	0.0442396	0.0367034	0.0323611	0.0685159	0.0349952	0.13272	0.0349874	0.0200505	0.00301717	0.108667	0.0549103	0.00888406	0.0349952	0.0454801	0.0622071	0.0492354	-0.000356216	0.0136298	0.0110366	0.0478799	0.064956	0.105167	0.77881	0.0743501
TCGA-05-4417	455	0	0.0548826	0.174737	0.0403916	0.0183318	0.0957305	0.151854	0.0508706	0.0917154	0.0859184	0.0332688	0.0966313	0.0474041	0.210797	0.0590899	0.0568893	0.0510969	-0.00531678	0.150204	0.208652	0.152408	0.544374	0.0850952	0.0363074	0.0675012	0.0579923	0.63612	0.070573	0.163162	0.111587	0.0513837	0.028682	0.0255859	0.0590899	0.0527913	0.323905	0.163162	0.0744836	0.0825657	0.055164	0.0202446	0.0363074	0.0300034	0.0548826	0.174737	0.150136	0.612302	0.158058
TCGA-62-8398	444	1	0.148245	0.379426	0.0475658	0.0196946	0.0625766	0.251597	0.0534527	0.136498	0.0891425	0.0158724	0.0773741	0.0502634	0.346543	0.0545102	0.0727271	0.0493057	0.0153934	0.34353	0.203047	0.147461	0.310567	0.0735936	0.0165913	0.0621051	0.0603502	0.0476743	0.0714926	0.0146423	0.0676061	0.0434481	0.0292727	0.0159503	0.0545102	0.0467444	0.0221904	0.0146423	0.0694877	0.0652804	0.0517736	0.0178696	0.0165913	0.0209292	0.148245	0.379426	0.16546	0.713594	0.099594
TCGA-NJ-A4YQ	1432	0	0.339044	0.290668	0.242657	0.0171976	0.0836673	0.167332	0.381969	0.526245	0.0998281	0.0821797	0.114759	0.0734316	0.288999	0.107562	0.160265	0.0811306	0.0690075	0.349503	0.348559	0.378916	0.353745	0.102084	0.0959454	0.246424	0.444667	0.455753	0.310388	0.233509	0.314314	0.121956	0.0293872	0.0647249	0.107562	0.0895099	0.0393155	0.233509	0.245782	0.134987	0.0818554	0.0670165	0.0959454	0.248822	0.339044	0.290668	0.42657	0.727965	0.255072
TCGA-MP-A4T4	2617	1	0.0995587	0.242173	0.0468445	0.0131245	0.247878	0.200504	0.0656767	0.203638	0.120157	0.0581554	0.138274	0.0710876	0.310894	0.0922173	0.13302	0.0606588	0.030891	0.202933	0.20392	0.359255	0.367908	0.123307	0.264935	0.144873	0.107433	0.0420781	0.0915593	0.089581	0.335443	0.0698109	0.0260618	0.199312	0.0922173	0.0545389	0.204265	0.089581	0.113278	0.109733	0.0784267	0.0239272	0.264935	0.226878	0.0995587	0.242173	0.205572	0.660382	0.217708
TCGA-64-1681	1167	1	0.0441522	0.154894	0.0362812	0.0109177	0.0835294	0.228544	0.0707503	0.128831	0.294833	0.0131988	0.137259	0.0805994	0.174371	0.0990636	0.0760321	0.0543526	0.0141408	0.122834	0.15212	0.134774	0.297918	0.18192	0.0113413	0.0680169	0.0859933	0.0786756	0.316716	0.0289961	0.304721	0.055454	0.0148474	0.0147206	0.0990636	0.0406401	0.013247	0.0289961	0.110339	0.0973732	0.0835384	0.0255847	0.0113413	0.030505	0.0441522	0.154894	0.142233	0.4687	0.12363
TCGA-78-7148	626	1	0.0774998	0.140763	0.0583731	0.0130069	0.124535	0.123613	0.0393997	0.191076	0.108521	0.0105674	0.0798919	0.0368246	0.149226	0.0490839	0.0597452	0.0400836	0.0196349	0.0875084	0.161583	0.195057	0.264361	0.0707891	0.0228488	0.0483176	0.0739309	0.0939847	0.0788553	0.0151741	0.104144	0.0507924	0.029609	0.0333553	0.0490839	0.0853861	0.0149759	0.0151741	0.0607363	0.0796869	0.0703575	0.0210165	0.0228488	0.0586617	0.0774998	0.140763	0.172725	0.745838	0.0599688
TCGA-MP-A4SY	1501	1	0.326368	0.119043	0.0759757	0.026609	0.196494	0.349684	0.0696648	0.203704	0.360806	0.0184116	0.156064	0.0545158	0.139385	0.134237	0.391343	0.0839135	0.0254819	0.0780284	0.137573	0.152451	0.395531	0.106725	0.0322758	0.296469	0.441649	0.0659687	0.0774876	0.126071	0.439302	0.428181	0.0296695	0.18753	0.134237	0.0725996	0.365437	0.126071	0.183144	0.213791	0.0837887	0.0457911	0.0322758	0.0705322	0.326368	0.119043	0.450128	0.48869	0.16668
TCGA-78-7153	3635	0	0.0632491	0.0730208	0.0244609	0.014749	0.417351	0.102836	0.0563205	0.083581	0.477403	0.258748	0.101646	0.135098	0.0792367	0.106797	0.0660064	0.024909	0.0133658	0.316593	0.127482	0.154627	0.734375	0.088003	0.0681101	0.126074	0.0587483	0.0543783	0.327258	0.0764674	0.427848	0.163301	0.0284374	0.346063	0.106797	0.0521723	0.589142	0.0764674	0.437762	0.459016	0.230993	0.028005	0.0681101	0.376084	0.0632491	0.0730208	0.190846	0.241959	0.0701432
TCGA-55-6968	1293	1	0.063359	0.16184	0.0544775	0.0264459	0.0866616	0.125583	0.0889401	0.221076	0.106398	0.0780138	0.192592	0.0740877	0.198791	0.112584	0.0610727	0.307442	0.0307463	0.3703	0.16948	0.1748	0.611136	0.176537	0.040796	0.14283	0.0887759	0.0930993	0.133723	0.0838515	0.440595	0.0596039	0.0306977	0.0227292	0.112584	0.0546486	0.0353696	0.0838515	0.120434	0.067319	0.0895255	0.0272112	0.040796	0.168902	0.063359	0.16184	0.231914	0.741017	0.323895
TCGA-86-8073	740	0	0.122979	0.0939132	0.0275538	0.00887393	0.19688	0.235303	0.0426302	0.107602	0.345601	-0.0011267	0.0964651	0.0419206	0.153289	0.134765	0.0759683	0.0353395	0.00292135	0.0430936	0.108065	0.119599	0.496166	0.0797264	0.211847	0.169508	0.0725258	0.0438977	0.421316	0.222543	0.294386	0.167409	0.0149703	0.0268897	0.134765	0.0574236	0.167635	0.222543	0.0997614	0.0707939	0.0484803	0.00877361	0.211847	0.00821717	0.122979	0.0939132	0.386156	0.423578	0.145286
TCGA-97-8171	568	0	0.0594398	0.0486975	0.0343805	0.0177054	0.191916	0.0626263	0.0613886	0.120377	0.159015	0.0669216	0.0773464	0.0483637	0.0831605	0.0740688	0.0510204	0.049252	0.0299692	0.0648016	0.0759978	0.093745	0.563266	0.0782928	0.0254021	0.0792391	0.0624955	0.0775479	0.0708162	0.0234261	0.379645	0.0410301	0.0240634	0.0490835	0.0740688	0.0658884	0.102125	0.0234261	0.107067	0.326882	0.0735415	0.0126188	0.0254021	0.0563084	0.0594398	0.0486975	0.107239	0.133793	0.0217716
TCGA-38-7271	800	1	0.131253	0.286533	0.034538	0.0158847	0.180037	0.149221	0.0648564	0.12659	0.265132	0.0638693	0.11565	0.0594039	0.279818	0.243391	0.134686	0.076665	0.00815791	0.266954	0.276697	0.224449	0.270155	0.0701759	0.0631734	0.228823	0.0913373	0.0524667	0.441071	0.131838	0.312545	0.169964	0.0239033	0.0483792	0.243391	0.19401	0.151698	0.131838	0.13833	0.282062	0.0643749	0.0247375	0.0631734	0.271094	0.131253	0.286533	0.358397	0.584521	0.301686
TCGA-78-7160	697	1	0.0947673	0.224885	0.0449484	0.0100472	0.0828598	0.165441	0.0472724	0.103855	0.124441	0.0363166	0.0716063	0.0454744	0.250074	0.0862408	0.0816749	0.0622592	0.00837711	0.10937	0.450149	0.228789	0.276566	0.10095	0.0205403	0.0638446	0.0804016	0.0841521	0.0806827	0.126917	0.212951	0.0390067	0.0313523	0.0258645	0.0862408	0.0376833	0.016146	0.126917	0.0883718	0.0759015	0.0595141	0.0140017	0.0205403	0.0238013	0.0947673	0.224885	0.179485	0.649346	0.16888
TCGA-44-8120	260	0	0.158777	0.142722	0.0155615	0.00666193	0.279232	0.176367	0.390523	0.127108	0.318811	0.0101609	0.108271	0.0556137	0.167088	0.199711	0.0617579	0.0858311	-0.00583971	0.070437	0.120702	0.148149	0.55049	0.113298	0.359832	0.202496	0.0616589	0.0625696	0.420072	0.252397	0.330765	0.0345913	0.0114734	0.419542	0.199711	0.0587203	0.0165553	0.252397	0.082638	0.058744	0.0640144	0.00557445	0.359832	0.267918	0.158777	0.142722	0.206017	0.573425	0.166858
TCGA-50-8459	1119	0	0.0460309	0.159489	0.0295551	0.00767742	0.0844291	0.315599	0.0447289	0.142658	0.103454	0.0545652	0.106623	0.0305004	0.188761	0.33926	0.0650288	0.0429313	0.00280056	0.153288	0.0999494	0.158557	0.39528	0.0951702	0.0183818	0.0875518	0.085716	0.0364899	0.0780291	0.137034	0.13081	0.0354274	0.0198518	0.0147847	0.33926	0.080905	0.0812652	0.137034	0.26624	0.134284	0.0845241	0.0516886	0.0183818	0.0223833	0.0460309	0.159489	0.178025	0.525479	0.158042
TCGA-44-2665	1301	0	0.0758155	0.100936	0.0510266	0.0144642	0.193766	0.258827	0.0607314	0.0791493	0.468939	0.0105196	0.129978	0.0420216	0.118272	0.104408	0.0840825	0.145215	0.03048	0.04289	0.092422	0.119175	0.471362	0.101913	0.0100586	0.0423663	0.0620302	0.0510766	0.0697477	0.339908	0.411108	0.0508209	0.0301843	0.0414004	0.104408	0.0513183	0.204422	0.339908	0.097282	0.193405	0.0443713	0.0108864	0.0100586	0.0106813	0.0758155	0.100936	0.0799678	0.591287	0.0769045
TCGA-95-A4VP	605	0	0.0869008	0.207091	0.0534642	0.0194823	0.104905	0.145016	0.0646717	0.143408	0.287091	0.0234405	0.115075	0.0485167	0.264681	0.0896852	0.110044	0.0644092	0.0268373	0.1492	0.190227	0.175445	0.40884	0.0980477	0.031853	0.209697	0.0882377	0.0306571	0.0920612	0.0240525	0.123526	0.0415481	0.0373584	0.0438841	0.0896852	0.0588527	0.267559	0.0240525	0.0986706	0.0912556	0.0441304	0.009921	0.031853	0.134841	0.0869008	0.207091	0.27961	0.623715	0.198233
TCGA-78-8662	3361	1	0.0640416	0.0997559	0.0324609	0.0104773	0.418084	0.116543	0.0514892	0.147272	0.431631	0.0281428	0.262364	0.0442199	0.128043	0.504188	0.0862685	0.060434	0.015192	0.0894852	0.166811	0.0916268	0.748915	0.297941	0.247156	0.0901894	0.0747483	0.0474312	0.552879	0.27972	0.0762842	0.0942214	0.0264119	0.669574	0.504188	0.0502733	0.514673	0.27972	0.147249	0.0703017	0.118804	0.0204516	0.247156	0.605381	0.0640416	0.0997559	0.115522	0.624837	0.113261
TCGA-95-7567	568	0	0.0659802	0.118776	0.038046	0.0176747	0.600087	0.106427	0.0573426	0.0902001	0.570838	0.0536285	0.108086	0.044049	0.171751	0.376079	0.12557	0.0472006	0.00816502	0.146547	0.13625	0.157186	0.655259	0.0782257	0.468972	0.252327	0.0752643	0.0497362	0.312528	0.581023	0.0885687	0.359154	0.497342	0.463474	0.376079	0.495721	0.512161	0.581023	0.0995787	0.376018	0.530566	0.0259333	0.468972	0.610241	0.0659802	0.118776	0.604082	0.63798	0.232576
TCGA-95-A4VN	553	0	0.045983	0.259471	0.0690487	0.0203471	0.182914	0.132507	0.0722927	0.112369	0.407359	0.0290504	0.102963	0.118418	0.2684	0.415263	0.104252	0.0652247	0.0309916	0.125718	0.266521	0.179026	0.460274	0.0775406	0.31283	0.0918558	0.112847	0.0604036	0.453352	0.30697	0.329643	0.0684558	0.0419761	0.410251	0.415263	0.187545	0.308843	0.30697	0.102824	0.174238	0.131432	0.0234397	0.31283	0.151465	0.045983	0.259471	0.332382	0.66815	0.178533
TCGA-05-4425	669	0	0.0509469	0.208202	0.0604965	0.0106472	0.602411	0.192604	0.0568624	0.118145	0.549534	0.436486	0.147328	0.0655206	0.25796	0.514511	0.103483	0.0579316	0.0232505	0.0542941	0.119161	0.136224	0.675678	0.0951413	0.0183834	0.184756	0.130895	0.122931	0.125631	0.481587	0.532679	0.248903	0.0709114	0.452121	0.514511	0.140133	0.541957	0.481587	0.615096	0.477583	0.479631	0.0155755	0.0183834	0.0233758	0.0509469	0.208202	0.380687	0.793753	0.100765
TCGA-38-4632	1357	1	0.0703721	0.158468	0.040248	0.0148516	0.310812	0.109982	0.0717963	0.121072	0.47646	0.24368	0.119809	0.0621818	0.228706	0.521194	0.0886985	0.0972961	0.0215009	0.0775102	0.191215	0.124916	0.478739	0.139511	0.0911621	0.199571	0.0798892	0.0703539	0.566984	0.291746	0.280572	0.265594	0.0344787	0.0323609	0.521194	0.0220701	0.273249	0.291746	0.169285	0.219982	0.0954553	0.0172581	0.0911621	0.0967373	0.0703721	0.158468	0.384834	0.687025	0.249458
TCGA-50-6594	370	1	0.342246	0.117479	0.0470686	0.0106049	0.0681237	0.115377	0.0605884	0.0864371	0.0983456	0.0117196	0.216176	0.0566709	0.149307	0.179859	0.0870737	0.058137	0.0172284	0.0605026	0.0808361	0.154021	0.0963069	0.0984103	0.0155531	0.0646684	0.0879877	0.0532857	0.0754574	0.011562	0.0586218	0.121592	0.0206322	0.0690516	0.179859	0.0402504	0.0232835	0.011562	0.0813084	0.0864642	0.0550813	0.0173234	0.0155531	0.0121223	0.342246	0.117479	0.428915	0.683556	0.316925
TCGA-67-6216	141	0	0.061425	0.182828	0.0497992	0.0140157	0.2229	0.111173	0.0597265	0.112435	0.467364	0.0589616	0.102188	0.0565634	0.196207	0.349239	0.228683	0.0739263	0.0303146	0.158256	0.145581	0.193764	0.524232	0.0785961	0.0418083	0.123369	0.0909385	0.0525549	0.625543	0.0897697	0.491367	0.221014	0.0290908	0.0417273	0.349239	0.0764224	0.411278	0.0897697	0.473876	0.21854	0.0681515	0.0394511	0.0418083	0.0287539	0.061425	0.182828	0.371694	0.487788	0.143429
TCGA-86-8056	139	0	0.119241	0.125356	0.0355483	0.00541912	0.181742	0.133313	0.0675876	0.12236	0.423521	0.00690708	0.0630895	0.0331356	0.197203	0.475231	0.0534367	0.0302413	-0.00362827	0.0851864	0.129237	0.0980066	0.465167	0.0695093	0.0268954	0.306348	0.0596554	0.053692	0.461598	0.355089	0.428076	0.0276997	0.0241233	0.0105074	0.475231	0.0520612	0.0253849	0.355089	0.350021	0.155233	0.0383221	0.0149974	0.0268954	0.0143081	0.119241	0.125356	0.0876311	0.338237	0.193824
TCGA-44-6144	723	0	0.0667206	0.10615	0.0573423	0.0183151	0.0776544	0.195828	0.046275	0.114812	0.0972769	0.0217776	0.142739	0.0502386	0.157068	0.258404	0.0754361	0.0994774	0.0210276	0.0928632	0.17056	0.142064	0.09854	0.101098	0.0191361	0.0560704	0.0625667	0.0609649	0.103058	0.229734	0.181538	0.0341916	0.0268068	0.162577	0.258404	0.0350188	0.0311909	0.229734	0.0940547	0.0771724	0.0644592	0.0307815	0.0191361	0.0272781	0.0667206	0.10615	0.120874	0.650782	0.114025
TCGA-99-AA5R	658	0	0.0592439	0.187343	0.0366896	0.00817404	0.0930645	0.22624	0.0487942	0.128342	0.176252	0.129942	0.117425	0.0517161	0.25526	0.210082	0.109301	0.0279952	0.0182735	0.155723	0.246022	0.119335	0.177667	0.055681	0.0368773	0.072838	0.0869107	0.048401	0.121999	0.0842518	0.180894	0.072328	0.0176945	0.0162293	0.210082	0.0331225	0.177038	0.0842518	0.0647972	0.175138	0.069028	0.0450139	0.0368773	0.0119083	0.0592439	0.187343	0.248004	0.540147	0.244162
TCGA-97-A4M0	652	0	0.113578	0.1226	0.0417824	0.0168511	0.0676527	0.0701132	0.0514841	0.10597	0.0876049	0.285338	0.245061	0.0701699	0.157962	0.346306	0.0931954	0.0410533	0.0125244	0.0579973	0.187673	0.127743	0.685235	0.0849278	0.174797	0.130494	0.0794976	0.0571527	0.709735	0.45422	0.427355	0.1251	0.0814086	0.56747	0.346306	0.0568924	0.508793	0.45422	0.116511	0.162406	0.11574	0.00988696	0.174797	0.0175609	0.113578	0.1226	0.209276	0.283503	0.103545
TCGA-86-7955	1072	0	0.14107	0.323704	0.0351054	0.016449	0.0933721	0.563102	0.0455789	0.726107	0.0801292	0.0200028	0.158903	0.0648835	0.26952	0.0403845	0.0953737	0.0588576	0.00131931	0.582353	0.581959	0.77662	0.121856	0.174893	0.091424	0.313429	0.099932	0.727102	0.0768261	0.400633	0.27114	0.0452827	0.0157354	0.498354	0.0403845	0.0428783	0.0272372	0.400633	0.103565	0.186478	0.0581483	0.0175279	0.091424	0.058437	0.14107	0.323704	0.701324	0.839874	0.116145
TCGA-50-5936	257	1	0.388654	0.430299	0.324139	0.0682025	0.105796	0.284156	0.371762	0.311319	0.347001	0.0218928	0.326379	0.446369	0.53885	0.0808096	0.464288	0.102465	0.330949	0.383062	0.5816	0.544159	0.0998537	0.109991	0.008824	0.388355	0.436488	0.546197	0.0999251	0.0371614	0.419865	0.0919087	0.0224919	0.127282	0.0808096	0.0436	0.0136835	0.0371614	0.100883	0.0572602	0.0362837	0.0135832	0.008824	0.146171	0.388654	0.430299	0.142202	0.705422	0.215691
TCGA-86-8054	1148	0	0.0773473	0.0663184	0.028987	0.00740796	0.0732402	0.0704516	0.0482124	0.0721922	0.0754776	0.00820441	0.247556	0.0521247	0.0977652	0.0366299	0.0804287	0.0619561	0.00560396	0.108496	0.0950801	0.244831	0.354599	0.365528	0.00507542	0.0630681	0.0618993	0.0509039	0.139576	0.0150274	0.0677289	0.64756	0.0223533	0.0148674	0.0366299	0.00657611	0.293852	0.0150274	0.0868301	0.0532001	0.0502204	0.00683406	0.00507542	0.620693	0.0773473	0.0663184	0.0445874	0.78633	0.239835
TCGA-L9-A743	664	0	0.0537042	0.163907	0.0380311	0.0123031	0.112114	0.129632	0.04009	0.0784104	0.273391	0.0551531	0.109703	0.0406771	0.334278	0.226223	0.101787	0.0417476	0.0174807	0.130462	0.213098	0.146398	0.243224	0.0596517	0.271824	0.105066	0.0447603	0.105078	0.0701329	0.212053	0.135473	0.0681834	0.0211761	0.270141	0.226223	0.0313102	0.183826	0.212053	0.108678	0.133024	0.172208	0.00929606	0.271824	0.130539	0.0537042	0.163907	0.247311	0.517477	0.232079
TCGA-86-A4P7	415	0	0.10597	0.180943	0.0323699	0.00294157	0.0716047	0.201998	0.043426	0.103902	0.094295	0.0973432	0.111685	0.0447983	0.197056	0.0979808	0.112285	0.0401226	0.0321748	0.17789	0.210553	0.205231	0.402297	0.102329	0.0282377	0.0748882	0.123195	0.0559437	0.113867	0.317711	0.183612	0.0851783	0.0209841	0.112484	0.0979808	0.117005	0.352442	0.317711	0.156997	0.121866	0.155315	0.0377867	0.0282377	0.372814	0.10597	0.180943	0.245066	0.538409	0.199219
TCGA-44-6146	728	0	0.0431036	0.094194	0.055327	0.0154523	0.217815	0.183555	0.0579485	0.0734577	0.410121	0.011581	0.0706583	0.0437341	0.123632	0.280721	0.0469493	0.0512555	0.013616	0.0684579	0.0958617	0.0777346	0.621726	0.124873	0.00952755	0.0872363	0.0713556	0.0480265	0.0937158	0.0176077	0.637147	0.0592319	0.0194627	0.03228	0.280721	0.043515	0.162121	0.0176077	0.0757832	0.132424	0.0788622	0.016182	0.00952755	0.0734695	0.0431036	0.094194	0.121493	0.29739	0.0885592
TCGA-05-4396	303	1	0.304886	0.179789	0.045018	0.0348413	0.15806	0.150073	0.426709	0.11939	0.611061	0.0100468	0.141654	0.0632647	0.144446	0.102382	0.0803975	0.0408172	0.642028	0.0859501	0.311747	0.182122	0.153291	0.15467	0.0189106	0.528364	0.0523637	0.640482	0.089194	0.0376146	0.117735	0.0660381	0.0234772	0.508819	0.102382	0.0629102	0.0314359	0.0376146	0.119884	0.0579376	0.0673597	0.029571	0.0189106	0.146602	0.304886	0.179789	0.163682	0.714226	0.123608
TCGA-55-8208	674	0	0.0940161	0.267361	0.0490554	0.00413292	0.0544416	0.172091	0.0375348	0.0777253	0.0851924	0.0399554	0.130426	0.0609005	0.290134	0.0761014	0.0963316	0.0321611	0.021774	0.149578	0.181778	0.151794	0.102333	0.0794073	0.0426642	0.0743498	0.0932271	0.0655377	0.0711448	0.081647	0.144882	0.0344559	0.010885	0.00444061	0.0761014	0.0385446	0.00585814	0.081647	0.0879975	0.0572918	0.0396469	0.0158567	0.0426642	0.0094555	0.0940161	0.267361	0.332207	0.677456	0.210819
TCGA-44-2656	1429	0	0.218313	0.204984	0.0916949	0.0312969	0.316447	0.164418	0.105906	0.110637	0.406753	0.180735	0.1376	0.075903	0.240344	0.373554	0.166547	0.107053	0.0694856	0.119292	0.288107	0.480773	0.460583	0.107324	0.26682	0.245723	0.165769	0.0569029	0.369505	0.307874	0.444223	0.146692	0.0638419	0.241482	0.373554	0.315402	0.31904	0.307874	0.188994	0.22397	0.183111	0.00913771	0.26682	0.3485	0.218313	0.204984	0.416081	0.653156	0.310408
TCGA-MP-A4SW	1778	1	0.0811708	0.159446	0.0378764	0.00544074	0.0717353	0.146398	0.0234765	0.0838493	0.0628268	0.0922251	0.0884792	0.0390647	0.186194	0.079338	0.0893397	0.0525966	0.0211391	0.139193	0.157634	0.130528	0.423143	0.0795723	0.0440827	0.168661	0.0983525	0.0355287	0.0667449	0.138603	0.0958075	0.0515642	0.0158533	0.069105	0.079338	0.0607369	0.377632	0.138603	0.260808	0.0665965	0.155048	0.0228966	0.0440827	0.332088	0.0811708	0.159446	0.293142	0.413008	0.13988
TCGA-73-7499	1531	1	0.131876	0.202759	0.0428435	0.0187883	0.0852027	0.132437	0.0706773	0.101153	0.0825205	0.0332806	0.115232	0.0538996	0.260067	0.066567	0.49616	0.0587485	0.00721136	0.161129	0.338595	0.21801	0.116033	0.122495	0.169139	0.136487	0.449813	0.0763648	0.0921238	0.186842	0.191037	0.499457	0.0108608	0.029964	0.066567	0.0655317	0.0855842	0.186842	0.0900851	0.0532337	0.076449	0.0235414	0.169139	0.0126009	0.131876	0.202759	0.47684	0.527005	0.364883
TCGA-44-7661	557	1	0.0517486	0.217067	0.0376628	0.00867661	0.228889	0.222038	0.0615164	0.134259	0.362816	0.0132616	0.218072	0.0518993	0.296749	0.359957	0.0794049	0.050863	0.0162267	0.0809126	0.241418	0.289564	0.297515	0.0749521	0.0197223	0.0994608	0.0715642	0.0568258	0.0902341	0.0538352	0.356245	0.0422575	0.0130272	0.0166177	0.359957	0.0206833	0.0114856	0.0538352	0.309351	0.31476	0.0508381	0.0111383	0.0197223	0.0953409	0.0517486	0.217067	0.443915	0.699988	0.234938
TCGA-86-8358	653	0	0.123912	0.61876	0.0555646	0.0174305	0.0768863	0.303407	0.0624295	0.348377	0.0855207	0.0154502	0.27902	0.0523759	0.62177	0.0484261	0.0728873	0.159613	0.0127932	0.674935	0.293752	0.0716406	0.436968	0.396292	0.063186	0.0441881	0.100977	0.0608461	0.110653	0.0283866	0.0998898	0.10115	0.023295	0.195142	0.0484261	0.0479577	0.00886956	0.0283866	0.0600572	0.0476304	0.0612873	0.0129908	0.063186	0.600938	0.123912	0.61876	0.0937936	0.834116	0.467329
TCGA-44-2668	761	1	0.060609	0.29933	0.0885044	0.0150065	0.185273	0.129968	0.122761	0.0823894	0.256446	0.030523	0.1676	0.0891312	0.317031	0.0799104	0.12659	0.0788482	0.0281707	0.11931	0.29417	0.142659	0.288099	0.093558	0.102481	0.124572	0.0920356	0.10322	0.0912203	0.130514	0.231528	0.0960235	0.042661	0.0372487	0.0799104	0.0521233	0.0460174	0.130514	0.139068	0.263182	0.0490358	0.0187263	0.102481	0.0255229	0.060609	0.29933	0.325528	0.731887	0.29197
TCGA-69-A59K	591	0	0.271936	0.143713	0.0517106	0.018755	0.494463	0.112124	0.11285	0.242938	0.518001	0.0219844	0.351853	0.152299	0.148906	0.41352	0.0890441	0.0943283	0.0279274	0.187942	0.326214	0.5878	0.531962	0.110096	0.50307	0.0682631	0.0679333	0.0485354	0.129639	0.528484	0.477757	0.0548325	0.0308831	0.0300487	0.41352	0.334097	0.512776	0.528484	0.285632	0.198192	0.0731795	0.0261666	0.50307	0.0668408	0.271936	0.143713	0.505082	0.711935	0.252285
TCGA-44-3917	1183	0	0.0803148	0.258782	0.0423333	0.00640893	0.208712	0.0811382	0.0584088	0.0898318	0.378321	0.0413843	0.0999564	0.0590308	0.240759	0.35929	0.183184	0.103329	0.00255548	0.16144	0.137075	0.162035	0.448295	0.145556	0.125357	0.0499033	0.0602243	0.0198126	0.417427	0.527453	0.389094	0.0580738	0.0301173	0.323335	0.35929	0.413667	0.0470256	0.527453	0.0938362	0.0883846	0.0713497	0.0221441	0.125357	0.440917	0.0803148	0.258782	0.205603	0.63466	0.244913
TCGA-55-8205	599	0	0.06108	0.292034	0.0436951	0.00517967	0.107515	0.155746	0.0708353	0.145359	0.26634	0.027784	0.164758	0.05075	0.306452	0.297664	0.120281	0.0419525	0.0129149	0.135655	0.32694	0.264891	0.455294	0.0774825	0.145937	0.186878	0.162997	0.0948475	0.0948599	0.532108	0.158046	0.0572878	0.0265938	0.0174774	0.297664	0.324577	0.0564446	0.532108	0.478587	0.0803222	0.311691	0.0137006	0.145937	0.0179414	0.06108	0.292034	0.16499	0.471103	0.213014
TCGA-78-7536	244	1	0.0378968	0.0934397	0.0471757	0.0099137	0.0924647	0.0555309	0.0708064	0.0926356	0.0906616	0.00553639	0.0695106	0.0428486	0.106586	0.0396794	0.0557551	0.0539187	0.00208019	0.117212	0.279826	0.260907	0.388341	0.124187	0.00731895	0.0645152	0.0746533	0.0496625	0.103001	0.0304316	0.0809459	0.0449328	0.0193866	0.0133204	0.0396794	0.0180595	0.00327978	0.0304316	0.071314	0.0324042	0.0550389	0.0106303	0.00731895	0.25977	0.0378968	0.0934397	0.711272	0.872497	0.0852572
TCGA-50-5049	3094	0	0.0838244	0.303242	0.0384112	0.0428201	0.0746027	0.182269	0.0540921	0.0994558	0.0815323	0.049575	0.0846331	0.0448733	0.304972	0.148189	0.0864881	0.0545827	0.0387212	0.228552	0.195924	0.203934	0.153678	0.0784529	0.273256	0.0967644	0.069178	0.0413672	0.480187	0.264126	0.150806	0.0580386	0.0222627	0.246417	0.148189	0.0533058	0.0536045	0.264126	0.125883	0.0475248	0.156873	0.018845	0.273256	0.159305	0.0838244	0.303242	0.342745	0.685989	0.234778
TCGA-50-7109	308	1	0.0870052	0.171307	0.0328706	0.0154499	0.110927	0.150173	0.0729153	0.0494832	0.340862	0.036697	0.0970453	0.0411695	0.226433	0.0687464	0.0825977	0.038168	0.0101418	0.134019	0.152426	0.114963	0.635791	0.0935872	0.0165486	0.071827	0.0736001	0.0509751	0.0789309	0.0576339	0.113937	0.0755736	0.0235959	0.0396136	0.0687464	0.0407159	0.0164251	0.0576339	0.073959	0.0629329	0.0493075	0.0156256	0.0165486	0.0259277	0.0870052	0.171307	0.106153	0.743256	0.189793
TCGA-86-8278	944	0	0.08045	0.130892	0.0437083	0.00620739	0.289044	0.222748	0.0557539	0.125483	0.437147	0.0424681	0.104582	0.0551491	0.135741	0.509191	0.217353	0.0637484	0.0233048	0.125202	0.232259	0.158279	0.452944	0.0816754	0.0501826	0.0614824	0.118103	0.0666685	0.0801894	0.233996	0.518833	0.0831348	0.0645702	0.0360976	0.509191	0.0736334	0.120959	0.233996	0.464648	0.341588	0.0902122	0.0271046	0.0501826	0.0296123	0.08045	0.130892	0.167782	0.506898	0.127079
TCGA-MP-A4T2	1136	1	0.0654785	0.142026	0.0402998	0.0110921	0.0652821	0.092394	0.0465848	0.0982846	0.0629319	0.0588072	0.25776	0.0449559	0.185072	0.0763146	0.135862	0.04339	0.0248996	0.0812471	0.164131	0.138158	0.0542132	0.0546973	0.0527293	0.444997	0.0592691	0.0375813	0.499414	0.0469092	0.167247	0.0492068	0.0175585	0.0393594	0.0763146	0.0521364	0.024188	0.0469092	0.0352304	0.0671848	0.0670208	0.0110362	0.0527293	0.0254511	0.0654785	0.142026	0.1487	0.510273	0.111768
TCGA-53-7626	929	1	0.0828244	0.209439	0.0419717	0.0136527	0.0665187	0.155467	0.0582675	0.12441	0.0956051	0.0415769	0.132897	0.0395088	0.238956	0.0798104	0.072107	0.0370064	0.0155986	0.118486	0.199358	0.144088	0.378827	0.0807992	0.0256978	0.124943	0.0745177	0.0577198	0.0643455	0.0536209	0.194805	0.105959	0.0183614	0.01482	0.0798104	0.0567423	0.0519723	0.0536209	0.0900459	0.140954	0.0722047	0.0135812	0.0256978	0.00942598	0.0828244	0.209439	0.222684	0.638086	0.172033
TCGA-49-4487	855	1	0.0778058	0.246042	0.0493945	0.0156256	0.0858774	0.163698	0.0673639	0.0741424	0.117322	0.0720129	0.105332	0.0525324	0.297367	0.114394	0.128176	0.0453227	0.00644794	0.263974	0.207307	0.211595	0.170058	0.108556	0.0475637	0.111327	0.0969152	0.0662648	0.0991092	0.11311	0.171468	0.0690914	0.0247904	0.0189336	0.114394	0.0650687	0.0782778	0.11311	0.112796	0.101745	0.115647	0.0333346	0.0475637	0.0229654	0.0778058	0.246042	0.312027	0.660489	0.254009
TCGA-53-7624	1043	1	0.161451	0.701867	0.136663	0.0148913	0.100427	0.621815	0.234941	0.242271	0.0879795	0.00794053	0.489486	0.0636915	0.702127	0.0453939	0.717123	0.33955	0.0295403	0.651656	0.529513	0.7457	0.0449291	0.122886	0.0102913	0.0725983	0.632756	0.822986	0.0925986	0.0227715	0.0560218	0.189384	0.0259254	0.0223846	0.0453939	0.0351492	0.0291701	0.0227715	0.0798287	0.0606233	0.0397275	0.0202485	0.0102913	0.101331	0.161451	0.701867	0.656448	0.573989	0.618613
TCGA-64-5779	864	0	0.0596847	0.144399	0.0291663	0.0172711	0.0697258	0.135605	0.0591601	0.101178	0.100422	0.0199774	0.0730463	0.0417959	0.196515	0.0859863	0.0567605	0.0394246	0.0316786	0.190469	0.138353	0.122315	0.14907	0.0619811	0.0164868	0.0647007	0.0495329	0.0370034	0.0579033	0.0437709	0.0751304	0.0653102	0.0246033	0.012451	0.0859863	0.0280425	0.0133772	0.0437709	0.0841397	0.0441222	0.0529348	0.0110952	0.0164868	0.35839	0.0596847	0.144399	0.22667	0.497125	0.166431
TCGA-78-7145	826	1	0.0683756	0.0894538	0.0521041	0.00606447	0.127164	0.112162	0.0614757	0.251642	0.214851	0.0128477	0.212216	0.043618	0.0989081	0.339508	0.0935497	0.06443	0.0193554	0.0523809	0.140761	0.502302	0.691642	0.0834376	0.0282921	0.0667778	0.0823122	0.0527713	0.0998742	0.0233223	0.508441	0.0667661	0.0218182	0.0334555	0.339508	0.0630838	0.0354764	0.0233223	0.0687949	0.0872638	0.0577231	0.0325975	0.0282921	0.0150815	0.0683756	0.0894538	0.128604	0.289921	0.169318
TCGA-49-4490	385	1	0.129659	0.173384	0.0511874	0.0160795	0.0815427	0.217144	0.0760399	0.114935	0.10576	0.0449166	0.155455	0.0922713	0.166952	0.0855336	0.103444	0.0603801	0.0254978	0.0772512	0.2259	0.153383	0.149411	0.107557	0.188318	0.180501	0.108499	0.0560775	0.209423	0.0496714	0.121069	0.0793831	0.0214082	0.0290537	0.0855336	0.063789	0.0435825	0.0496714	0.0887553	0.0764289	0.0787944	0.0163776	0.188318	0.0426023	0.129659	0.173384	0.212907	0.423126	0.196287
TCGA-44-A47F	337	0	0.178994	0.119972	0.0608917	0.0107493	0.110914	0.152102	0.0735507	0.137353	0.0735551	0.0585201	0.101496	0.0623463	0.146098	0.0635426	0.257339	0.0511432	0.0204137	0.0647324	0.163907	0.130462	0.487557	0.0758185	0.0265204	0.135163	0.110481	0.061448	0.0942938	0.0414159	0.285354	0.223634	0.0322443	0.168984	0.0635426	0.0777839	0.431905	0.0414159	0.0946385	0.0954649	0.0716151	0.0295761	0.0265204	0.286207	0.178994	0.119972	0.437706	0.503511	0.095593
TCGA-L4-A4E6	435	0	0.0592731	0.189386	0.04867	0.016815	0.110623	0.225782	0.0627795	0.211856	0.192806	0.0365073	0.149742	0.0372444	0.222247	0.183443	0.114054	0.0506548	0.0309243	0.0860689	0.182014	0.140041	0.199608	0.0691475	0.0241961	0.0636812	0.0755215	0.0505946	0.131884	0.068578	0.1695	0.0577975	0.0312675	0.0473711	0.183443	0.0483387	0.0423771	0.068578	0.117963	0.118778	0.0719295	0.145668	0.0241961	0.064209	0.0592731	0.189386	0.216195	0.589671	0.182635
TCGA-50-5932	1235	1	0.0857551	0.128007	0.0534017	0.0252704	0.114499	0.0862174	0.0731393	0.125023	0.11192	0.0138681	0.108044	0.0503264	0.101031	0.0679519	0.0589274	0.0466468	0.0294024	0.0885619	0.111365	0.089672	0.265543	0.0848222	0.0917219	0.0789718	0.0817989	0.048342	0.0763304	0.0227028	0.457184	0.0702249	0.032837	0.0380138	0.0679519	0.0568919	0.0375213	0.0227028	0.121032	0.109217	0.0692416	0.0264854	0.0917219	0.0322546	0.0857551	0.128007	0.126385	0.20712	0.0458337
TCGA-MP-A4TJ	339	1	0.0665621	0.284453	0.0401761	0.0172382	0.10932	0.129311	0.0922803	0.172472	0.113871	0.0542454	0.118004	0.0584756	0.311171	0.0924308	0.118766	0.0787739	0.0376286	0.206071	0.278735	0.203833	0.410394	0.0762861	0.0503333	0.0622468	0.0919591	0.0354477	0.111128	0.0821238	0.168442	0.0873587	0.0331066	0.0219621	0.0924308	0.0807244	0.0371483	0.0821238	0.145814	0.132488	0.0721955	0.0276245	0.0503333	0.0552495	0.0665621	0.284453	0.265228	0.551677	0.261591
TCGA-78-8655	2360	0	0.071754	0.137829	0.038907	0.0160497	0.321221	0.103311	0.030662	0.143935	0.661862	0.0205287	0.0829868	0.0400425	0.159022	0.488541	0.0754121	0.043644	-0.000989615	0.0581873	0.166681	0.173104	0.689767	0.053163	0.0212531	0.190484	0.0729066	0.0491483	0.0682179	0.0295227	0.623314	0.108189	0.021724	0.0360241	0.488541	0.0392642	0.179981	0.0295227	0.173458	0.336604	0.0599618	0.0292323	0.0212531	0.738113	0.071754	0.137829	0.32332	0.720631	0.121441
TCGA-83-5908	824	0	0.0585352	0.2916	0.0331126	0.0194462	0.365667	0.194488	0.0416599	0.12773	0.411314	0.0220468	0.136913	0.0594894	0.383271	0.110663	0.134403	0.0714226	0.0204646	0.120331	0.234518	0.165265	0.408728	0.104412	0.316115	0.0748574	0.0832971	0.069306	0.100919	0.300947	0.140934	0.101636	0.0328132	0.0334171	0.110663	0.0522182	0.0309013	0.300947	0.0889461	0.188442	0.0700952	0.0285584	0.316115	0.0403036	0.0585352	0.2916	0.351697	0.752813	0.263941
TCGA-62-8395	1216	0	0.104573	0.0988808	0.0556805	0.012672	0.202176	0.128318	0.0584138	0.179875	0.477651	0.0154183	0.103291	0.0411639	0.0949495	0.361598	0.0879291	0.041138	0.0404743	0.0929729	0.202365	0.105729	0.608124	0.0590768	0.0221789	0.140172	0.0573064	0.0590654	0.377954	0.307348	0.55643	0.321171	0.0215567	0.0250601	0.361598	0.0906647	0.289495	0.307348	0.137725	0.38291	0.0726664	0.0137562	0.0221789	0.309241	0.104573	0.0988808	0.165787	0.327929	0.0315506
TCGA-95-7948	476	0	0.0703099	0.0742674	0.0434853	0.0215196	0.316727	0.103844	0.0384482	0.20868	0.262616	0.0332667	0.0776103	0.0535891	0.0750146	0.438836	0.122305	0.036304	0.047681	0.0839335	0.0826314	0.0942302	0.343516	0.0678691	0.237531	0.149647	0.0720188	0.0435473	0.567078	0.13796	0.203581	0.0530614	0.0226426	0.0191087	0.438836	0.09921	0.0974902	0.13796	0.194241	0.312266	0.0572817	0.0204189	0.237531	0.0409593	0.0703099	0.0742674	0.38058	0.315052	0.0442833
TCGA-86-7714	625	1	0.0945331	0.0781044	0.0688004	0.013842	0.270478	0.151497	0.0476272	0.117359	0.451287	0.0155538	0.136692	0.0599285	0.108001	0.34891	0.0946823	0.051655	0.0244735	0.0655907	0.152056	0.0955218	0.511312	0.0902588	0.0161142	0.0995898	0.0853437	0.0635675	0.0746429	0.0285056	0.473438	0.111664	0.0264181	0.0321399	0.34891	0.0590227	0.0407653	0.0285056	0.374175	0.180196	0.0689319	0.0286699	0.0161142	0.050476	0.0945331	0.0781044	0.580697	0.285963	0.108736
TCGA-05-4405	610	0	0.0986673	0.0995049	0.0382294	0.0206008	0.0768821	0.181314	0.0534555	0.0828539	0.0830064	0.131709	0.112446	0.055496	0.101489	0.163528	0.344747	0.0537485	0.0770188	0.154058	0.171081	0.141158	0.558	0.0822361	0.365887	0.422168	0.123634	0.0483579	0.431516	0.349423	0.156483	0.229987	0.0250089	0.481016	0.163528	0.087051	0.560826	0.349423	0.134733	0.390611	0.319969	0.0137105	0.365887	0.560246	0.0986673	0.0995049	0.492073	0.618212	0.216968
TCGA-97-8177	499	0	0.0678631	0.182046	0.0416229	0.0114759	0.0800689	0.254569	0.0587356	0.129389	0.126861	0.0350177	0.124988	0.062349	0.199853	0.0998935	0.156416	0.0705305	0.0241044	0.147464	0.162692	0.190041	0.132129	0.107556	0.0376019	0.322265	0.110554	0.0668888	0.437186	0.0907492	0.149469	0.175479	0.0275604	0.0256645	0.0998935	0.0623712	0.0325036	0.0907492	0.110424	0.077817	0.0836749	0.0285074	0.0376019	0.103774	0.0678631	0.182046	0.200912	0.410303	0.169888
TCGA-50-6592	777	1	0.304075	0.490685	0.0447234	0.0167544	0.113374	0.29429	0.0660418	0.17934	0.108567	0.02935	0.135759	0.0459845	0.504487	0.096634	0.205673	0.051748	0.123041	0.419995	0.324302	0.333074	0.0917208	0.104602	0.00846705	0.355726	0.0877276	0.0650067	0.411456	0.0581323	0.105601	0.0398085	0.0216446	0.0145703	0.096634	0.0475003	0.0347427	0.0581323	0.0928363	0.121776	0.0565914	0.0194802	0.00846705	0.224117	0.304075	0.490685	0.405675	0.814644	0.319247
TCGA-62-8402	1498	1	0.0577817	0.462071	0.0489015	0.0194711	0.08496	0.103608	0.0585878	0.157029	0.0969614	0.011256	0.0862305	0.0533087	0.562269	0.0467363	0.0791891	0.036369	0.00838686	0.326552	0.173093	0.140206	0.45805	0.115722	0.0252815	0.054586	0.0724557	0.0880356	0.0708866	0.0213961	0.103848	0.0686435	0.0446694	0.0171174	0.0467363	0.0477019	0.00409651	0.0213961	0.0643183	0.0545706	0.0449295	0.0160039	0.0252815	0.0361799	0.0577817	0.462071	0.118572	0.828521	0.172507
TCGA-55-A48Y	630	0	0.0549889	0.215526	0.0604631	0.0213819	0.0811536	0.228759	0.0656849	0.154993	0.0829786	0.0591066	0.127432	0.130268	0.248837	0.0893463	0.134083	0.0680535	0.0587077	0.143793	0.220982	0.296012	0.257099	0.0992894	0.219197	0.0798158	0.0890552	0.4254	0.0991556	0.103037	0.109354	0.0690638	0.0374987	0.0172784	0.0893463	0.0618591	0.0327854	0.103037	0.133479	0.165323	0.103267	0.0416296	0.219197	0.0693833	0.0549889	0.215526	0.180064	0.452212	0.213028
TCGA-73-4658	1600	1	0.0852479	0.195701	0.0575402	0.0086386	0.359922	0.246352	0.087339	0.121356	0.407353	0.351405	0.158731	0.286248	0.253174	0.473093	0.182207	0.0660559	-0.00118864	0.0923637	0.214936	0.155334	0.41564	0.102256	0.166285	0.203378	0.44948	0.0615729	0.360397	0.363192	0.469241	0.11857	0.0353873	0.177053	0.473093	0.377469	0.488651	0.363192	0.430635	0.416274	0.451498	0.0910489	0.166285	0.357692	0.0852479	0.195701	0.389068	0.633828	0.239712
TCGA-MP-A4TH	741	0	0.0611853	0.186001	0.0511239	0.0201363	0.303006	0.163245	0.0748331	0.154547	0.328521	0.0758143	0.127438	0.0527473	0.213745	0.106437	0.148807	0.0824433	0.0309091	0.201116	0.186823	0.192725	0.166821	0.0874641	0.0439327	0.0759241	0.101114	0.0546241	0.0922215	0.137613	0.431326	0.1717	0.0301587	0.0371862	0.106437	0.114873	0.0246565	0.137613	0.117693	0.265417	0.11657	0.0491178	0.0439327	0.0322501	0.0611853	0.186001	0.254246	0.452073	0.201434
TCGA-95-8494	84	0	0.123187	0.0747367	0.0723842	0.0186518	0.230509	0.169762	0.076454	0.117393	0.255457	0.000738245	0.07368	0.0354812	0.108318	0.271094	0.0838449	0.042047	0.0794594	0.0610034	0.0671191	0.0953444	0.601566	0.0537484	0.362278	0.198798	0.107449	0.0535698	0.64926	0.408635	0.435722	0.401624	0.0226001	0.439709	0.271094	0.332929	0.0921749	0.408635	0.594412	0.188208	0.571858	0.0712052	0.362278	0.412371	0.123187	0.0747367	0.0945406	0.273677	0.144723
TCGA-49-6745	522	0	0.0572421	0.213066	0.0472412	0.0221804	0.261681	0.21049	0.0580452	0.138483	0.354844	0.0244072	0.140509	0.0566516	0.306579	0.328197	0.338267	0.0684581	0.00916784	0.0746292	0.203651	0.201866	0.480816	0.0914618	0.325624	0.419269	0.309315	0.0434427	0.0690857	0.466664	0.45672	0.0478454	0.0187538	0.315666	0.328197	0.224955	0.430496	0.466664	0.44108	0.46036	0.0752905	0.0317034	0.325624	0.172594	0.0572421	0.213066	0.434755	0.752551	0.285857
TCGA-78-7166	258	1	0.233319	0.339578	0.0495407	0.0153499	0.0874086	0.180333	0.0791659	0.111579	0.0957611	0.0288669	0.12494	0.0525134	0.276332	0.0637501	0.183724	0.0371717	0.106898	0.196654	0.221903	0.394524	0.302163	0.110449	0.0114805	0.185687	0.118734	0.771334	0.081125	0.0695175	0.0739037	0.0383267	0.0232672	0.0344283	0.0637501	0.0463473	0.0255013	0.0695175	0.080729	0.0504244	0.0572412	0.0134713	0.0114805	0.0323559	0.233319	0.339578	0.09226	0.702793	0.126684
TCGA-44-8119	285	0	0.0673359	0.0861595	0.0327912	0.0147451	0.0821459	0.108534	0.0579398	0.115174	0.086717	0.00240429	0.0561434	0.0227168	0.0770512	0.0317419	0.0353274	0.0419283	0.0159559	0.0585988	0.0739231	0.0709476	0.0542679	0.157611	0.00961886	0.0440437	0.0572605	0.0440015	0.0549584	0.0563135	0.0450153	0.0295964	0.010624	0.00607423	0.0317419	0.0240604	-0.0010846	0.0563135	0.0636982	0.0348542	0.0457507	0.00204813	0.00961886	0.0160229	0.0673359	0.0861595	0.0765642	0.510483	0.0676615
TCGA-62-A46O	1454	1	0.321164	0.62495	0.0627047	0.0178632	0.118838	0.423377	0.719933	0.839787	0.0826758	0.030669	0.402356	0.0547487	0.503787	0.0581715	0.156439	0.197941	0.0339761	0.667016	0.657232	0.780246	0.129544	0.365275	0.025997	0.279013	0.123778	0.87469	0.0702252	0.0373206	0.0533571	0.0723753	0.0238091	0.035641	0.0581715	0.0721411	0.027078	0.0373206	0.0876466	0.0818778	0.0811144	0.0232297	0.025997	0.0726544	0.321164	0.62495	0.641603	0.674808	0.141911
TCGA-55-8089	702	1	0.0525082	0.329135	0.0381332	0.00609028	0.14017	0.207485	0.0520919	0.133164	0.332283	0.024756	0.146823	0.0412178	0.339562	0.111571	0.119317	0.0436589	0.341516	0.214845	0.436631	0.328802	0.276797	0.0761155	0.0347529	0.183507	0.0744981	0.0295737	0.497365	0.153092	0.348658	0.0269255	0.0140714	0.288369	0.111571	0.021217	0.00103514	0.153092	0.0648149	0.0667173	0.037952	0.00766499	0.0347529	-0.00776627	0.0525082	0.329135	0.433952	0.713076	0.216907
TCGA-69-7763	690	0	0.0496554	0.136445	0.0463081	0.00773328	0.119703	0.203819	0.0467078	0.119813	0.258031	0.0329383	0.131665	0.0612724	0.146313	0.162169	0.10703	0.0549676	0.0101274	0.0944118	0.13463	0.13351	0.435344	0.0833919	0.0175808	0.077793	0.0733806	0.0591101	0.093258	0.094649	0.190783	0.136451	0.0279042	0.274	0.162169	0.0608101	0.0702109	0.094649	0.453944	0.116422	0.0919073	0.0309454	0.0175808	0.033144	0.0496554	0.136445	0.149402	0.434289	0.143426
TCGA-NJ-A4YG	2261	0	0.0681186	0.174612	0.0858629	0.0244419	0.179031	0.225826	0.0735314	0.192249	0.297232	0.0310567	0.127073	0.0736692	0.183511	0.399796	0.114519	0.0997565	0.0314302	0.0975472	0.182158	0.155446	0.387287	0.0917093	0.0428796	0.172415	0.0810466	0.0707407	0.165249	0.321786	0.382376	0.134831	0.0257603	0.109072	0.399796	0.0880465	0.385114	0.321786	0.0880428	0.240362	0.0758666	0.0320817	0.0428796	0.234562	0.0681186	0.174612	0.190874	0.456871	0.116014
TCGA-62-A46P	594	1	0.0802758	0.377121	0.0628985	0.0198331	0.397106	0.103947	0.0787945	0.152478	0.494779	0.0593322	0.123515	0.0702253	0.421228	0.1522	0.142645	0.101545	0.0504435	0.0986558	0.13385	0.150146	0.705019	0.0763718	0.0304784	0.525938	0.110149	0.0601933	0.0810711	0.505064	0.660579	0.149788	0.0351372	0.229365	0.1522	0.0724991	0.536096	0.505064	0.154444	0.41139	0.078912	0.0513486	0.0304784	0.431419	0.0802758	0.377121	0.126557	0.785053	0.0894629
TCGA-49-4514	1700	0	0.12825	0.303538	0.0620384	0.0277138	0.0710797	0.113286	0.0654869	0.131442	0.0941379	0.0613094	0.0974151	0.0666984	0.29136	0.0973125	0.110778	0.0552712	0.0483788	0.193708	0.306427	0.17717	0.336781	0.0991757	0.0318349	0.0882662	0.0817559	0.0327091	0.0975511	0.102541	0.12728	0.0513349	0.0248762	0.0250323	0.0973125	0.0756825	0.0292911	0.102541	0.0834505	0.0696408	0.0881675	0.0339745	0.0318349	0.0249382	0.12825	0.303538	0.384445	0.56098	0.197477
TCGA-71-8520	210	1	0.0306422	0.0850266	0.0609225	0.0106405	0.155876	0.143681	0.0360626	0.114631	0.359958	0.0172525	0.113251	0.0438248	0.0850806	0.0473108	0.0563837	0.0551553	0.0218858	0.0514692	0.124245	0.075749	0.658951	0.102919	0.160038	0.0588024	0.0656458	0.0364608	0.0556768	0.180559	0.217211	0.168586	0.0282358	0.0124877	0.0473108	0.028637	0.461327	0.180559	0.0846837	0.0460095	0.107816	0.0142436	0.160038	0.0152699	0.0306422	0.0850266	0.248091	0.498548	0.114446
TCGA-NJ-A7XG	617	0	0.0791596	0.0434646	0.037837	0.00481109	0.285817	0.1183	0.0356592	0.076581	0.52707	0.00956785	0.0790559	0.036771	0.0786601	0.070013	0.0466222	0.0319803	0.0136744	0.0435561	0.099843	0.0677192	0.632025	0.0950528	0.0126796	0.0477222	0.0320498	0.0399705	0.0487035	0.0649976	0.338	0.057963	0.0217358	0.00868008	0.070013	0.0311354	0.187284	0.0649976	0.0662605	0.326702	0.0558366	0.0119175	0.0126796	0.0150999	0.0791596	0.0434646	0.0811984	0.249207	0.077339
TCGA-MN-A4N4	1175	0	0.0781154	0.0844723	0.0445071	0.011746	0.0792837	0.273231	0.0417195	0.112234	0.0611845	0.0252731	0.101524	0.0346897	0.113497	0.0714002	0.107459	0.0427212	0.0103965	0.131484	0.0983666	0.152506	0.474383	0.0684429	0.367493	0.0515217	0.0736556	0.0343618	0.46091	0.125378	0.105399	0.112307	0.0146155	0.0989389	0.0714002	0.0664982	0.0252955	0.125378	0.0784957	0.151506	0.0630494	0.322935	0.367493	0.109011	0.0781154	0.0844723	0.243474	0.697948	0.12857
TCGA-55-7574	995	1	0.0516241	0.278256	0.0475743	0.0184039	0.112917	0.157264	0.0518273	0.096688	0.1171	0.0796871	0.104357	0.0421757	0.304749	0.0997855	0.141421	0.0579364	0.0101633	0.199448	0.181674	0.150247	0.352827	0.0805273	0.0372656	0.189375	0.0807134	0.0499187	0.0789289	0.353538	0.129856	0.172799	0.0288888	0.110984	0.0997855	0.0639438	0.200473	0.353538	0.141685	0.161043	0.0732887	0.0146875	0.0372656	0.017047	0.0516241	0.278256	0.31606	0.630811	0.247163
TCGA-50-5941	1474	0	0.065263	0.292413	0.052602	0.00827295	0.286356	0.110658	0.0874385	0.109903	0.324002	0.0437563	0.109315	0.0695636	0.313196	0.342433	0.128925	0.0878903	0.000428753	0.139076	0.269128	0.166187	0.526372	0.0919838	0.0645099	0.0940887	0.0992319	0.0556061	0.0945633	0.0820389	0.370258	0.0823551	0.022648	0.0534702	0.342433	0.0513244	0.315861	0.0820389	0.118879	0.105162	0.0775072	0.0421069	0.0645099	0.0408803	0.065263	0.292413	0.192315	0.719262	0.251719
TCGA-64-5774	2676	0	0.0436877	0.0913759	0.0412839	0.0166729	0.0870665	0.0870354	0.0507478	0.154169	0.0908568	0.0199249	0.0827102	0.040504	0.112972	0.0416474	0.0515994	0.0325535	0.0284052	0.0835796	0.144576	0.125224	0.520086	0.084465	0.00789931	0.0394908	0.0606448	0.0353539	0.0611758	0.0631118	0.0418574	0.059014	0.025095	0.0164548	0.0416474	0.0629754	0.137806	0.0631118	0.0767855	0.0537316	0.0340833	0.0279589	0.00789931	0.0449466	0.0436877	0.0913759	0.0773178	0.719196	0.111706
TCGA-86-A4JF	737	1	0.0829844	0.124456	0.0284182	0.0129613	0.267635	0.129282	0.0429916	0.110652	0.20845	0.026074	0.130698	0.0322606	0.131684	0.268943	0.214529	0.0524496	0.0168042	0.0819488	0.165569	0.108905	0.401202	0.0659926	0.201039	0.108233	0.164287	0.0344586	0.121147	0.425245	0.328033	0.0292823	0.0204594	0.143387	0.268943	0.360243	0.141532	0.425245	0.0738537	0.384475	0.0616862	0.0145818	0.201039	0.0184996	0.0829844	0.124456	0.414065	0.685094	0.178242
TCGA-55-6981	1379	1	0.0903142	0.245456	0.105196	0.0332346	0.347285	0.224157	0.105884	0.170041	0.489634	0.037987	0.154071	0.0757502	0.285219	0.336567	0.119746	0.101497	0.0267596	0.127411	0.225893	0.198253	0.422152	0.132699	0.0513016	0.0981606	0.102938	0.0997455	0.114428	0.101237	0.284424	0.161001	0.039698	0.363467	0.336567	0.094862	0.107262	0.101237	0.327714	0.133809	0.216076	0.0413327	0.0513016	0.277673	0.0903142	0.245456	0.246067	0.712628	0.243785
TCGA-86-8668	423	0	0.0469022	0.149669	0.061621	0.00609152	0.375845	0.169032	0.0473362	0.135639	0.406787	0.0976799	0.106684	0.0401909	0.167502	0.397126	0.0920826	0.0567305	0.0235415	0.104932	0.12905	0.146143	0.562219	0.0981679	0.0224403	0.0710776	0.109468	0.0523579	0.092189	0.198261	0.46991	0.0957861	0.0341379	0.187974	0.397126	0.234868	0.136094	0.198261	0.108401	0.146444	0.128468	0.055356	0.0224403	0.35056	0.0469022	0.149669	0.131066	0.320153	0.154815
TCGA-78-7155	1171	1	0.049485	0.266658	0.0558627	0.0342218	0.154683	0.0835403	0.0976191	0.210728	0.102923	0.0350552	0.336979	0.0535292	0.4455	0.123583	0.0631231	0.514919	0.0156184	0.733877	0.247344	0.257716	0.364177	0.499592	0.0313295	0.361584	0.0864953	0.0394628	0.113297	0.0276524	0.0751694	0.0316532	0.0251659	0.041267	0.123583	0.0878427	0.0552004	0.0276524	0.0683295	0.0433118	0.0370054	0.037076	0.0313295	0.216764	0.049485	0.266658	0.118937	0.328595	0.0767017
TCGA-86-8075	694	1	0.0330799	0.0841268	0.0224515	0.00794929	0.0694328	0.253463	0.0872808	0.0949044	0.0969889	0.0212639	0.0897869	0.0401426	0.102748	0.0815212	0.0569309	0.0409866	0.0122218	0.0986472	0.107896	0.111715	0.178248	0.0770939	0.00879217	0.0533708	0.0655097	0.0573832	0.0530438	0.0297202	0.0793574	0.0278729	0.0185967	0.00911808	0.0815212	0.0329425	-0.00260762	0.0297202	0.0890202	0.0453891	0.040601	0.00231234	0.00879217	0.00438006	0.0330799	0.0841268	0.172807	0.652156	0.0980336
TCGA-55-7576	670	0	0.210984	0.195897	0.040099	0.0143342	0.426083	0.142128	0.0614026	0.13214	0.583412	0.00747956	0.113871	0.0666819	0.266363	0.56237	0.129394	0.0584979	0.0151532	0.104874	0.193294	0.158973	0.652615	0.113781	0.170179	0.100612	0.110161	0.0647164	0.618852	0.39858	0.610874	0.121467	0.0261168	0.0742056	0.56237	0.129187	0.513027	0.39858	0.209391	0.213016	0.064972	0.0155364	0.170179	0.449439	0.210984	0.195897	0.385675	0.705976	0.261597
TCGA-05-5429	275	1	0.108935	0.336184	0.0417552	0.0130675	0.25878	0.240713	0.0510097	0.0930965	0.435587	0.0282677	0.112374	0.0441016	0.31313	0.403207	0.0434723	0.0473548	0.0173842	0.207511	0.0985516	0.0902635	0.684264	0.0633289	0.0259284	0.412449	0.0715252	0.0563285	0.0759504	0.0397267	0.0921847	0.0465451	0.0198156	0.467113	0.403207	0.0561073	0.117268	0.0397267	0.106998	0.0397441	0.0471102	0.0203674	0.0259284	0.0121436	0.108935	0.336184	0.388687	0.66375	0.0814982
TCGA-50-5044	624	1	0.0570826	0.194665	0.0763582	0.0159325	0.0956308	0.353684	0.0563932	0.131419	0.178673	0.036302	0.357572	0.0660572	0.234059	0.39406	0.174037	0.138267	0.0329126	0.121103	0.186553	0.209321	0.248201	0.0958264	0.029912	0.105549	0.236762	0.0397574	0.373981	0.0460766	0.285764	0.111336	0.0212629	0.080255	0.39406	0.0792914	0.171743	0.0460766	0.152419	0.154875	0.0548037	0.0346445	0.029912	0.0289645	0.0570826	0.194665	0.371707	0.638599	0.248107
TCGA-05-4390	1126	0	0.0549661	0.138024	0.0478438	0.0167214	0.297537	0.10275	0.0553813	0.0886726	0.610424	0.0586615	0.12099	0.0518157	0.173047	0.353129	0.151034	0.23731	0.00709423	0.0966683	0.148121	0.152156	0.396552	0.178417	0.0903508	0.0504351	0.0455612	0.777097	0.0676086	0.0454092	0.0476828	0.101699	0.0300916	0.0339112	0.353129	0.040573	0.0470052	0.0454092	0.0946106	0.0616404	0.101004	0.00844092	0.0903508	0.259103	0.0549661	0.138024	0.123696	0.776036	0.185835
TCGA-97-8175	551	0	0.0505982	0.198877	0.0376546	0.014378	0.156395	0.152566	0.035176	0.101407	0.291607	0.028022	0.138255	0.0525817	0.235555	0.398096	0.168893	0.0466057	0.0014886	0.121666	0.184248	0.1483	0.520049	0.079656	0.137928	0.308054	0.0728707	0.0532305	0.0909093	0.343695	0.328655	0.0477265	0.0142618	0.0326328	0.398096	0.111992	0.031633	0.343695	0.40288	0.134507	0.434235	0.0109195	0.137928	0.547525	0.0505982	0.198877	0.284016	0.694521	0.230138
TCGA-62-A46U	2067	0	0.08047	0.302767	0.0483036	0.0288478	0.414712	0.123652	0.0651339	0.170157	0.553229	0.0485685	0.0899243	0.0711728	0.363267	0.38389	0.154075	0.0735785	0.0427444	0.0861904	0.241717	0.227992	0.547559	0.0912807	0.0368612	0.0707716	0.0700708	0.635788	0.573877	0.0471372	0.351764	0.118267	0.0385494	0.0448535	0.38389	0.0780547	0.0377369	0.0471372	0.430918	0.167254	0.0777484	0.0421718	0.0368612	0.544871	0.08047	0.302767	0.451824	0.643806	0.277785
TCGA-55-6983	2823	0	0.0871779	0.19987	0.0621905	0.0171526	0.251052	0.190446	0.0962393	0.16989	0.359751	0.0588965	0.11739	0.0874731	0.251969	0.170239	0.116977	0.0569518	0.0498368	0.19256	0.191476	0.191018	0.472726	0.0979675	0.067736	0.106484	0.103206	0.05361	0.0903468	0.29417	0.347671	0.0766646	0.0316343	0.0653532	0.170239	0.0791485	0.369604	0.29417	0.101069	0.181726	0.0879687	0.0362044	0.067736	0.0499945	0.0871779	0.19987	0.236464	0.53427	0.180967
TCGA-50-5930	282	1	0.13685	0.280519	0.152265	0.0125368	0.0863801	0.242338	0.0769238	0.109579	0.102222	0.0793453	0.129287	0.0570889	0.31987	0.0889552	0.179772	0.0714367	0.223076	0.344586	0.309503	0.581775	0.0945929	0.0819989	0.0269819	0.124127	0.0842736	0.596963	0.0916756	0.0744454	0.115084	0.0622803	0.0188509	0.00659493	0.0889552	0.0540964	0.0087279	0.0744454	0.0866995	0.0837689	0.0680258	0.0273063	0.0269819	0.0335593	0.13685	0.280519	0.217475	0.730879	0.18389
TCGA-MP-A4TD	307	1	0.0874598	0.181799	0.0864573	0.0258698	0.29739	0.247087	0.116264	0.227649	0.425984	0.152923	0.12288	0.078216	0.145706	0.387456	0.140324	0.0910962	0.0396524	0.215847	0.229254	0.205092	0.43971	0.105004	0.0439851	0.099402	0.0879605	0.0552563	0.0901626	0.209321	0.424226	0.250668	0.0424575	0.061601	0.387456	0.115799	0.190287	0.209321	0.141009	0.186766	0.0999689	0.0243752	0.0439851	0.0460808	0.0874598	0.181799	0.234685	0.583132	0.15392
TCGA-97-7554	775	0	0.124511	0.160893	0.0378456	0.00492045	0.408349	0.156957	0.0719623	0.164157	0.50367	0.389003	0.196053	0.0515974	0.183006	0.423399	0.112781	0.0610384	0.0486422	0.136173	0.227004	0.119097	0.625254	0.0810313	0.433835	0.37306	0.107022	0.0470698	0.178129	0.147709	0.517907	0.131451	0.156039	0.358459	0.423399	0.445601	0.269809	0.147709	0.150154	0.0972334	0.265468	0.451792	0.433835	0.592139	0.124511	0.160893	0.48736	0.706411	0.249207
TCGA-73-A9RS	340	1	0.441077	0.637585	0.371104	0.0175682	0.0600382	0.651759	0.0591451	0.445608	0.0646856	0.0208119	0.139513	0.0732693	0.589434	0.0804317	0.711331	0.0817543	0.0198094	0.600141	0.609957	0.775424	0.456269	0.617154	0.0234818	0.23654	0.538113	0.0909712	0.120898	0.119942	0.284058	0.102085	0.0299391	0.0239643	0.0804317	0.0758505	0.0152725	0.119942	0.0783263	0.179254	0.078816	0.012727	0.0234818	0.249189	0.441077	0.637585	0.620779	0.85417	0.426245
TCGA-78-7539	791	0	0.0741753	0.175114	0.0381091	0.0091225	0.37241	0.0776347	0.0882861	0.107323	0.476589	0.0264638	0.0696531	0.0522243	0.213923	0.0464749	0.0977447	0.0455399	0.0161566	0.0749559	0.16269	0.131492	0.643925	0.0754044	0.0109233	0.0949545	0.0685949	0.0459399	0.0650644	0.0507642	0.0887798	0.0610952	0.0146735	0.0170348	0.0464749	0.0366888	0.0065771	0.0507642	0.091084	0.0689054	0.0645462	0.0131041	0.0109233	0.00933241	0.0741753	0.175114	0.119638	0.301699	0.147859
TCGA-97-A4M6	568	0	0.0677934	0.208668	0.0399052	0.00916496	0.135362	0.181893	0.037635	0.0981036	0.1567	0.0213844	0.149391	0.0431563	0.258933	0.0691983	0.101247	0.0453835	0.0142187	0.0884149	0.256674	0.170703	0.45772	0.111863	0.0201094	0.1758	0.0778623	0.0344301	0.0741536	0.0417259	0.130395	0.054767	0.018696	0.0307323	0.0691983	0.0480029	0.0122509	0.0417259	0.0714587	0.0858325	0.0512492	0.0181948	0.0201094	0.0226494	0.0677934	0.208668	0.142111	0.514123	0.183707
TCGA-78-7147	586	1	0.0500388	0.0881419	0.0468977	0.0106079	0.186008	0.125202	0.0469174	0.0836578	0.290025	0.0168175	0.089529	0.0360796	0.10092	0.041399	0.0673505	0.029034	0.0224857	0.0371281	0.175189	0.0928971	0.693616	0.0768432	0.0221615	0.0999966	0.0588841	0.0485849	0.582504	0.0412206	0.0651382	0.0524819	0.0235224	0.0230889	0.041399	0.028595	0.039156	0.0412206	0.100214	0.0516024	0.0547514	0.0164011	0.0221615	0.179961	0.0500388	0.0881419	0.220542	0.245448	0.109655
TCGA-86-7953	997	0	0.0427121	0.159251	0.0554101	0.0151981	0.0777024	0.111663	0.0690538	0.146579	0.084437	0.0269019	0.0760135	0.0557967	0.221792	0.0734583	0.0880003	0.0518755	0.017692	0.0890106	0.214234	0.137042	0.563594	0.071717	0.0282827	0.0481338	0.0747795	0.0520354	0.0775481	0.111027	0.146882	0.0523111	0.0345221	0.0282495	0.0734583	0.0695888	0.0188863	0.111027	0.072355	0.0641254	0.0667194	0.0175259	0.0282827	0.0408673	0.0427121	0.159251	0.164159	0.818755	0.213178
TCGA-62-8397	1289	0	0.0406528	0.0752378	0.0360746	0.0171527	0.207931	0.121551	0.0410915	0.0788872	0.586531	0.0257431	0.0695935	0.0450732	0.104353	0.433782	0.0452736	0.0396241	0.0181945	0.0462849	0.0883837	0.0769249	0.797736	0.0789465	0.0459296	0.0494039	0.0670902	0.0735925	0.0900927	0.0299867	0.486333	0.038002	0.0261645	0.0275408	0.433782	0.0429705	0.0278081	0.0299867	0.0809749	0.162373	0.0544924	0.0231799	0.0459296	0.0259751	0.0406528	0.0752378	0.279078	0.232798	0.0881413
TCGA-73-4676	281	1	0.204775	0.0904241	0.0500539	0.0151995	0.154533	0.186974	0.0644053	0.0921833	0.326357	0.00985573	0.158639	0.0543265	0.111176	0.523	0.11085	0.06284	0.0118657	0.101488	0.0639633	0.13633	0.561274	0.079281	0.286791	0.369931	0.459509	0.0633066	0.0969322	0.161911	0.523445	0.122146	0.0269504	0.392261	0.523	0.0522946	0.011194	0.161911	0.0851777	0.218187	0.0731209	0.0177819	0.286791	0.0262806	0.204775	0.0904241	0.565474	0.699659	0.198427
TCGA-50-6590	1288	1	0.0528996	0.210886	0.028983	0.00882522	0.0951849	0.223604	0.063199	0.297228	0.0750524	0.0965042	0.121944	0.0463464	0.238265	0.0770311	0.166748	0.247675	0.0142335	0.220619	0.26244	0.227385	0.357294	0.0885469	0.337422	0.0848302	0.147594	0.0486239	0.0593549	0.337626	0.0905854	0.11753	0.0169614	0.10017	0.0770311	0.0532257	0.29258	0.337626	0.0993424	0.0770671	0.0644218	0.0260852	0.337422	0.0229005	0.0528996	0.210886	0.479909	0.765094	0.297797
TCGA-05-5420	457	0	0.152376	0.291144	0.0532066	0.0273006	0.0736863	0.176709	0.164609	0.150979	0.119639	0.026573	0.124971	0.04848	0.271037	0.0852208	0.0988694	0.0410023	0.00986944	0.364728	0.213074	0.544868	0.144235	0.137035	0.0193698	0.102394	0.0669238	0.433004	0.0738456	0.0372252	0.114063	0.0527845	0.0193046	0.0263537	0.0852208	0.0595472	0.0134244	0.0372252	0.0824659	0.0743152	0.0614473	0.0236669	0.0193698	0.0802823	0.152376	0.291144	0.218442	0.671659	0.249208
TCGA-MP-A4TF	336	1	0.0710551	0.288794	0.0486067	0.0248623	0.10193	0.350964	0.344219	0.364674	0.102413	0.0213606	0.267704	0.554746	0.335101	0.0878524	0.362629	0.0722849	0.0630245	0.44422	0.614826	0.52584	0.355325	0.1343	0.023986	0.503585	0.274653	0.0723676	0.504998	0.0701394	0.208576	0.111863	0.0299021	0.181009	0.0878524	0.07747	0.0440459	0.0701394	0.115604	0.102606	0.0999729	0.0246438	0.023986	0.0677694	0.0710551	0.288794	0.48815	0.806688	0.385035
TCGA-86-8673	862	0	0.0649426	0.220774	0.0463488	0.0149779	0.25323	0.156751	0.0489121	0.0916605	0.418189	0.0310339	0.0917201	0.047819	0.275231	0.299262	0.126806	0.0801581	0.0265861	0.0816552	0.106631	0.324013	0.575793	0.0786101	0.562587	0.0535162	0.0718383	0.051743	0.0678147	0.196789	0.268475	0.324384	0.0349095	0.0296253	0.299262	0.101616	0.547369	0.196789	0.343581	0.369533	0.0728235	0.0141323	0.562587	0.0311645	0.0649426	0.220774	0.506596	0.80443	0.0972447
TCGA-MP-A4SV	2620	1	0.0825116	0.164394	0.0488649	0.0086543	0.152286	0.13629	0.0611896	0.115772	0.408825	0.0814328	0.126122	0.0602122	0.222724	0.255569	0.102775	0.0631677	0.0307476	0.164741	0.217706	0.175762	0.401353	0.104047	0.0726176	0.0812194	0.0935759	0.0540002	0.469222	0.153704	0.1352	0.0577522	0.0342932	0.394345	0.255569	0.100892	0.036633	0.153704	0.164237	0.285986	0.341778	0.0424987	0.0726176	0.0457418	0.0825116	0.164394	0.256832	0.434936	0.169103
TCGA-50-5939	460	1	0.0964072	0.218601	0.0511017	0.0132949	0.133931	0.288039	0.101055	0.266207	0.099789	0.0247605	0.129816	0.0398971	0.238855	0.106903	0.136472	0.0483392	0.321032	0.172625	0.259761	0.22298	0.130154	0.0655132	0.373409	0.36931	0.0784009	0.527663	0.545083	0.078883	0.100461	0.0463931	0.021864	0.094926	0.106903	0.0662019	0.0368235	0.078883	0.0815966	0.0718404	0.0468094	0.020577	0.373409	0.0484169	0.0964072	0.218601	0.378092	0.791578	0.251696
TCGA-62-A470	1194	1	0.0536978	0.133426	0.0486772	0.015809	0.106243	0.12509	0.0374712	0.135154	0.27968	0.0211385	0.101306	0.057332	0.13534	0.430915	0.0760956	0.0486874	0.0193544	0.406057	0.109437	0.11415	0.0565272	0.0673011	0.0582027	0.0573649	0.0654985	0.064469	0.0879823	0.0494148	0.0916898	0.0570495	0.0344918	0.0402822	0.430915	0.0569256	0.0309474	0.0494148	0.0922017	0.0580475	0.0646328	0.0393898	0.0582027	0.0666716	0.0536978	0.133426	0.119046	0.470051	0.0780764
TCGA-95-7947	477	0	0.048232	0.0947595	0.0323128	0.0112374	0.142044	0.0661535	0.053728	0.119965	0.0982205	0.0109704	0.0791297	0.0427015	0.107505	0.0524078	0.0515797	0.0297877	0.00771388	0.0764517	0.475436	0.130703	0.649967	0.0661508	0.0787036	0.434928	0.0688445	0.0371846	0.0701427	0.083613	0.609158	0.0417113	0.022443	0.105017	0.0524078	0.050628	0.0685553	0.083613	0.210537	0.263713	0.0446463	0.00874548	0.0787036	0.0730378	0.048232	0.0947595	0.518427	0.759856	0.120425
TCGA-55-7910	1040	0	0.139141	0.295554	0.0571823	0.0182465	0.12466	0.104744	0.0937565	0.159719	0.111849	0.0214873	0.0734126	0.0441849	0.37682	0.0503976	0.0924248	0.0740172	0.0214477	0.148601	0.190273	0.134309	0.0596784	0.129775	0.0557331	0.0519354	0.0641164	0.0559183	0.0891999	0.0394656	0.0584539	0.0739884	0.0425886	0.0330844	0.0503976	0.0543976	0.0209276	0.0394656	0.0522941	0.104195	0.0628501	0.0207677	0.0557331	0.0360416	0.139141	0.295554	0.433155	0.814676	0.179337
TCGA-55-6975	118	1	0.400506	0.165487	0.216503	0.308401	0.0738892	0.285006	0.350493	0.450504	0.0879065	0.0369397	0.399877	0.0827164	0.246003	0.187555	0.237609	0.118686	0.549701	0.37216	0.48224	0.513421	0.118034	0.10655	0.153782	0.398957	0.366294	0.482328	0.253438	0.102749	0.153263	0.0552926	0.0296023	0.0752059	0.187555	0.0712784	0.0348245	0.102749	0.0879818	0.0512433	0.0646126	0.0191098	0.153782	0.0466707	0.400506	0.165487	0.288286	0.752261	0.215073
TCGA-78-7162	3169	1	0.0821852	0.181901	0.032549	0.00937964	0.151328	0.217244	0.0606031	0.145017	0.281852	0.0362296	0.146718	0.0416726	0.218003	0.165098	0.0651811	0.0490759	0.0213279	0.164121	0.165317	0.156834	0.406799	0.0876988	0.0232166	0.0868481	0.0787774	0.0646846	0.155562	0.0373395	0.316279	0.0609588	0.0183584	0.0399914	0.165098	0.0485731	0.0162344	0.0373395	0.127413	0.0914637	0.102649	0.0149398	0.0232166	0.0465811	0.0821852	0.181901	0.221975	0.457082	0.175332
TCGA-91-6828	323	0	0.0666217	0.150061	0.0462593	0.0119829	0.263791	0.130252	0.0906353	0.10298	0.399584	0.0530701	0.0803368	0.0467243	0.18214	0.38342	0.0962277	0.0596768	0.0147632	0.133834	0.430334	0.127298	0.547021	0.092204	0.0202531	0.078864	0.0845215	0.05379	0.0654088	0.083889	0.17658	0.081729	0.0211855	0.0342068	0.38342	0.056035	0.144534	0.083889	0.242357	0.124466	0.0981419	0.0124416	0.0202531	0.264489	0.0666217	0.150061	0.164399	0.533293	0.185431
TCGA-05-4415	91	1	0.428712	0.682968	0.264065	0.0113979	0.0808804	0.48049	0.334303	0.844008	0.0935389	0.0109059	0.410123	0.0606825	0.647763	0.060744	0.37142	0.325009	0.497833	0.708375	0.634491	0.670007	0.0718861	0.486613	0.0203651	0.368884	0.273923	0.7416	0.314329	0.0144484	0.0764029	0.073469	0.0238827	0.0273514	0.060744	0.0112644	0.0480515	0.0144484	0.0633803	0.0565397	0.04869	0.0103388	0.0203651	0.13556	0.428712	0.682968	0.164196	0.833392	0.204412
TCGA-55-8203	547	0	0.0374619	0.101885	0.0260959	0.0122543	0.0774616	0.0891576	0.0301795	0.053198	0.326988	0.101482	0.0890884	0.0478125	0.167979	0.113908	0.0892959	0.0344506	0.0223442	0.193985	0.11033	0.146896	0.593755	0.0867581	0.0624801	0.0745721	0.0910407	0.0521715	0.0643933	0.0960655	0.112474	0.0969379	0.0215627	0.373504	0.113908	0.0726823	0.0161122	0.0960655	0.161618	0.0912488	0.109057	0.0105759	0.0624801	0.0738314	0.0374619	0.101885	0.176715	0.693486	0.130849
TCGA-69-7980	411	0	0.0518566	0.308071	0.0442222	0.0141433	0.0715948	0.0956945	0.0593068	0.125261	0.0972914	0.0160794	0.167574	0.0780959	0.338929	0.0548519	0.175073	0.0353535	0.0187552	0.0518834	0.260385	0.115423	0.459757	0.104684	0.0268458	0.187787	0.07155	0.0507648	0.577724	0.0282316	0.171643	0.125735	0.0253248	0.013378	0.0548519	0.0438677	0.112316	0.0282316	0.0617127	0.0648892	0.0575421	0.0202886	0.0268458	0.0195687	0.0518566	0.308071	0.645951	0.623905	0.187114
TCGA-44-3918	1036	0	0.110368	0.211726	0.0494834	0.0598675	0.265678	0.181864	0.149463	0.0714181	0.325745	0.0191775	0.114934	0.0885997	0.242401	0.37896	0.143266	0.0599434	0.0271252	0.108001	0.117443	0.14379	0.315622	0.0649928	0.465791	0.0660708	0.0967311	0.0624822	0.105547	0.172185	0.423986	0.222486	0.0489529	0.0367832	0.37896	0.0816859	0.0841686	0.172185	0.0974072	0.286852	0.0660591	0.0253483	0.465791	0.330835	0.110368	0.211726	0.16204	0.636412	0.223065
TCGA-78-7143	4961	1	0.0609261	0.119362	0.0438024	0.0109736	0.367787	0.105714	0.0577808	0.0949567	0.357267	0.0155698	0.139417	0.040991	0.136205	0.286063	0.0814711	0.0524863	0.0110685	0.066756	0.139002	0.126338	0.513604	0.0999924	0.0168078	0.0895237	0.0618733	0.0609406	0.0551751	0.0803041	0.217123	0.041448	0.0262588	0.0180914	0.286063	0.0176314	0.189765	0.0803041	0.0784042	0.0634895	0.0577913	0.0124041	0.0168078	0.0484288	0.0609261	0.119362	0.239126	0.449196	0.0829245
TCGA-78-8660	321	1	0.0506807	0.244583	0.0281188	0.0160805	0.0854311	0.11859	0.0397127	0.122866	0.216171	0.032616	0.0629061	0.0567813	0.274888	0.430965	0.0988134	0.0468358	0.00144641	0.149016	0.188886	0.185461	0.4746	0.0748871	0.0717575	0.0656421	0.0936986	0.0506604	0.424851	0.528982	0.353294	0.114589	0.0306291	0.0340743	0.430965	0.0710012	0.0263362	0.528982	0.104411	0.290835	0.055841	0.0218331	0.0717575	0.0237014	0.0506807	0.244583	0.354491	0.71036	0.244713
TCGA-78-7158	179	1	0.0451528	0.0478292	0.0487417	0.0217147	0.315077	0.0689823	0.0598148	0.0909355	0.308842	0.0162499	0.0504875	0.0378489	0.0740661	0.15208	0.106733	0.0352839	0.106454	0.0560369	0.10075	0.0853776	0.487055	0.0715196	0.128492	0.125554	0.0706428	0.0481615	0.0649295	0.0245004	0.258609	0.0804459	0.0294927	0.308084	0.15208	0.0399176	0.063027	0.0245004	0.146865	0.277248	0.0556587	0.0164897	0.128492	0.743816	0.0451528	0.0478292	0.199939	0.105849	0.018743
TCGA-86-8671	839	0	0.069445	0.335254	0.0333508	0.0192874	0.164814	0.1822	0.0373323	0.101952	0.17374	0.11253	0.105772	0.0618491	0.346797	0.10344	0.102252	0.0652768	0.0107657	0.182467	0.289144	0.224456	0.319484	0.0791929	0.0487868	0.073245	0.0779832	0.0491447	0.0623777	0.182918	0.199064	0.0412366	0.0265282	0.0404308	0.10344	0.0668963	0.089395	0.182918	0.11484	0.0823982	0.0972965	0.0257681	0.0487868	0.0349882	0.069445	0.335254	0.242352	0.592434	0.252151
TCGA-86-8585	353	0	0.0550076	0.253605	0.0344876	0.0166285	0.0715266	0.368807	0.0432073	0.167083	0.067244	0.0409649	0.152253	0.0529928	0.259708	0.071727	0.128519	0.0567637	0.0285853	0.247741	0.318558	0.393749	0.136081	0.0768904	0.0287425	0.0606939	0.0618405	0.453819	0.0625613	0.0772775	0.157745	0.0455493	0.0261449	0.0276354	0.071727	0.0469345	0.0185354	0.0772775	0.098975	0.0652792	0.0834484	0.0197279	0.0287425	0.0332418	0.0550076	0.253605	0.245182	0.681015	0.188798
TCGA-55-6987	2137	0	0.174428	0.275673	0.0614145	0.0332773	0.212414	0.119327	0.202791	0.1792	0.236072	0.0867093	0.148941	0.0964022	0.333416	0.171284	0.160208	0.0814597	0.0544167	0.254623	0.18493	0.400236	0.214698	0.180606	0.06754	0.23509	0.129601	0.449759	0.116322	0.28798	0.274289	0.0860263	0.0429875	0.214093	0.171284	0.126351	0.0410767	0.28798	0.117921	0.103208	0.102757	0.0394078	0.06754	0.0868674	0.174428	0.275673	0.385528	0.699109	0.275816
TCGA-78-8648	1209	1	0.0786343	0.186748	0.0452744	0.0095455	0.0585503	0.303428	0.0339818	0.181671	0.0896208	0.0667781	0.0876952	0.0502537	0.227978	0.102371	0.132597	0.052447	0.0278622	0.164429	0.223028	0.2002	0.183617	0.0524383	0.0787705	0.064843	0.0655738	0.0320335	0.073171	0.151934	0.156819	0.0346909	0.0291871	0.0361366	0.102371	0.0917199	0.118189	0.151934	0.0778253	0.0956655	0.0544209	0.0187321	0.0787705	0.0937696	0.0786343	0.186748	0.248029	0.595398	0.213839
TCGA-44-7671	889	0	0.0788876	0.0743929	0.0679042	0.0234025	0.105755	0.174957	0.0792334	0.109906	0.14428	0.0216368	0.115931	0.0475147	0.0824809	0.0907345	0.22477	0.0715531	0.0188574	0.341539	0.113525	0.0978823	0.164739	0.108666	0.121853	0.0926195	0.0897938	0.073532	0.10683	0.0548483	0.203394	0.0634462	0.0197354	0.0223161	0.0907345	0.0274062	0.0252723	0.0548483	0.0865979	0.0697016	0.0607575	0.0123319	0.121853	0.0297929	0.0788876	0.0743929	0.180875	0.439105	0.102628
TCGA-05-4427	791	0	0.0366291	0.113056	0.036396	0.0199606	0.0771713	0.122875	0.0483914	0.0826444	0.257072	0.0134116	0.121019	0.0515754	0.158937	0.533838	0.0297462	0.056745	0.0183238	0.217337	0.108763	0.08807	0.368527	0.0487125	0.0164099	0.060065	0.0725718	0.0576693	0.67827	0.390354	0.438182	0.033617	0.0171074	0.331225	0.533838	0.0446489	0.344872	0.390354	0.0884426	0.262002	0.0528421	0.0152991	0.0164099	0.00960097	0.0366291	0.113056	0.118736	0.680861	0.112664
TCGA-64-5815	866	0	0.124311	0.138422	0.0400155	0.0191022	0.266217	0.276093	0.0622502	0.131425	0.381715	0.0187249	0.377096	0.0507376	0.199847	0.221024	0.373323	0.0558284	0.0222579	0.0964718	0.189499	0.231916	0.379938	0.0803746	0.012931	0.055908	0.0811862	0.0491132	0.456887	0.259175	0.112287	0.379358	0.0269535	0.26605	0.221024	0.0432807	0.10188	0.259175	0.0922267	0.0986687	0.0474213	0.0115292	0.012931	0.023255	0.124311	0.138422	0.40863	0.582363	0.207105
TCGA-97-A4M2	624	0	0.055288	0.197596	0.0327866	0.0176671	0.0926975	0.19751	0.0420875	0.125697	0.20627	0.0285712	0.114097	0.0320772	0.214752	0.103364	0.0788634	0.0550465	0.0261917	0.103355	0.15412	0.13195	0.246525	0.0592225	0.0164531	0.0404565	0.0658141	0.0291267	0.124092	0.0388051	0.201445	0.0387234	0.0250864	0.0305411	0.103364	0.0539654	0.211424	0.0388051	0.0812737	0.0547499	0.0582492	0.0229787	0.0164531	0.029619	0.055288	0.197596	0.162407	0.539695	0.170417
TCGA-55-A48X	689	0	0.110486	0.24661	0.0777152	0.0124214	0.333181	0.149949	0.0560316	0.117365	0.270748	0.158132	0.105677	0.0556144	0.276316	0.119602	0.165308	0.0965118	0.0295353	0.271039	0.263925	0.293493	0.416881	0.0945495	0.121936	0.219128	0.143591	0.0648186	0.126505	0.290061	0.285342	0.132107	0.0383022	0.0527675	0.119602	0.143256	0.0547725	0.290061	0.138225	0.128523	0.152814	0.0481922	0.121936	0.0758043	0.110486	0.24661	0.346789	0.576573	0.341796
TCGA-50-5933	2393	1	0.0535209	0.123934	0.0516556	0.013995	0.225248	0.260388	0.0789837	0.097345	0.320491	0.0190272	0.131534	0.0529256	0.186157	0.491923	0.133273	0.0771408	0.015173	0.0725441	0.14732	0.192911	0.321705	0.0805022	0.319121	0.0567367	0.0769311	0.0614847	0.470683	0.46416	0.338454	0.076109	0.0381045	0.433549	0.491923	0.475668	0.52313	0.46416	0.556828	0.418786	0.386593	0.0339037	0.319121	0.0247527	0.0535209	0.123934	0.461464	0.497608	0.2535
TCGA-55-6980	2109	0	0.0545697	0.191168	0.0579997	0.0130817	0.205662	0.285043	0.0592049	0.118206	0.119461	0.0360881	0.107413	0.05285	0.239541	0.0778739	0.0976508	0.061218	0.0281494	0.0725438	0.25687	0.152757	0.117078	0.111025	0.0348835	0.0776741	0.0738872	0.0558427	0.0803039	0.0308022	0.156465	0.0613611	0.0284989	0.0266026	0.0778739	0.102016	0.013524	0.0308022	0.0982905	0.109728	0.0619583	0.0280907	0.0348835	0.0299586	0.0545697	0.191168	0.199133	0.452054	0.171234
TCGA-38-A44F	133	0	0.0945746	0.268951	0.0600214	0.0187558	0.197706	0.278083	0.0591934	0.126106	0.168201	0.0959102	0.115844	0.0853761	0.267962	0.297468	0.136327	0.100477	0.0350907	0.21058	0.248408	0.214208	0.344816	0.114044	0.0642235	0.0855222	0.0959659	0.0627996	0.109627	0.132984	0.360304	0.0534426	0.0411141	0.0487838	0.297468	0.109172	0.0486322	0.132984	0.119272	0.115802	0.105757	0.0319036	0.0642235	0.0516287	0.0945746	0.268951	0.233004	0.533615	0.218075
TCGA-97-8176	468	1	0.0782228	0.206752	0.052286	0.0152773	0.0822476	0.141334	0.0418009	0.135592	0.0812085	0.0229522	0.0946071	0.0413241	0.272941	0.0696898	0.077454	0.0409847	0.0378955	0.112738	0.165039	0.235125	0.288755	0.0851298	0.0235516	0.0378692	0.0740537	0.045172	0.254734	0.0391349	0.0959392	0.0354464	0.0258399	0.0153916	0.0696898	0.02831	0.00462785	0.0391349	0.0843015	0.0792391	0.0478362	0.0145725	0.0235516	0.0437932	0.0782228	0.206752	0.392623	0.529833	0.156326
TCGA-05-5715	62	0	0.301486	0.0612222	0.0358511	0.00926886	0.0587435	0.0966153	0.0625272	0.0870496	0.0962118	0.0101631	0.0853166	0.0465541	0.0585669	0.0408064	0.189415	0.0427173	0.0261666	0.060631	0.215175	0.0781855	0.481017	0.0422092	0.0317728	0.375708	0.246692	0.051819	0.0545123	0.0764463	0.0549592	0.268092	0.0181781	0.0122554	0.0408064	0.0322155	0.236408	0.0764463	0.0662686	0.0444347	0.0546728	0.0146565	0.0317728	0.016363	0.301486	0.0612222	0.0823403	0.290249	0.0994071
TCGA-95-7562	87	1	0.189976	0.0991933	0.0327173	0.0102983	0.278317	0.0878645	0.0346434	0.0649734	0.449602	0.0166254	0.107943	0.0446643	0.103848	0.0625718	0.0650012	0.0447112	0.0224069	0.162753	0.26814	0.223676	0.404256	0.0785106	0.00302768	0.0657759	0.0569742	0.227642	0.0790502	0.0658425	0.265848	0.0706825	0.0196149	0.0202526	0.0625718	0.0300865	0.0374243	0.0658425	0.0641784	0.16942	0.0384318	0.00947981	0.00302768	0.0878029	0.189976	0.0991933	0.535341	0.802127	0.138839
TCGA-44-A47B	287	0	0.0583232	0.134237	0.0503432	0.0158836	0.174514	0.139252	0.0542308	0.160131	0.381978	0.0311203	0.12562	0.0471479	0.234935	0.463605	0.190855	0.0696497	0.0246574	0.0801198	0.230961	0.116089	0.660995	0.0814128	0.0348703	0.0658311	0.0735408	0.0514459	0.0812964	0.570218	0.641903	0.262611	0.0367987	0.0370571	0.463605	0.0994628	0.0251109	0.570218	0.0824452	0.246078	0.089384	0.0394511	0.0348703	0.452041	0.0583232	0.134237	0.227209	0.382743	0.11819
TCGA-50-6593	336	1	0.162771	0.171038	0.0435903	0.0180964	0.291315	0.231068	0.0567947	0.0900145	0.40759	0.0138076	0.143161	0.0581889	0.190815	0.336793	0.0915436	0.0610221	0.0231277	0.0736441	0.139653	0.168941	0.472439	0.116297	0.0154662	0.204646	0.106943	0.0650555	0.0920476	0.112896	0.270622	0.080808	0.0347387	0.0157113	0.336793	0.0392239	0.0983056	0.112896	0.105628	0.228174	0.0621879	0.0233859	0.0154662	0.0208896	0.162771	0.171038	0.348863	0.425228	0.202687
TCGA-64-1679	2488	0	0.0495877	0.109105	0.0624552	0.00923118	0.108329	0.334219	0.0692824	0.117886	0.123462	0.0118632	0.148169	0.0391434	0.119789	0.0693508	0.0601125	0.126656	0.0131189	0.0578529	0.149531	0.11149	0.0937368	0.0943169	0.0341744	0.0460462	0.0764055	0.0544566	0.0819799	0.0271433	0.189488	0.0454593	0.0203404	0.0158671	0.0693508	0.0247173	0.380052	0.0271433	0.0939269	0.0842897	0.0512624	0.0130704	0.0341744	0.024469	0.0495877	0.109105	0.0993721	0.619739	0.0730386
TCGA-50-5072	250	1	0.320561	0.414862	0.175145	0.0162089	0.0932018	0.378423	0.274672	0.231889	0.135117	0.0367866	0.246493	0.0696828	0.407571	0.0952538	0.517519	0.0936217	0.24925	0.464739	0.518448	0.491357	0.130636	0.149412	0.0652186	0.33874	0.504246	0.535166	0.0949229	0.0563405	0.142313	0.156983	0.0215152	0.0176892	0.0952538	0.0542505	0.0194708	0.0563405	0.0838513	0.0796294	0.0729136	0.0174271	0.0652186	0.307647	0.320561	0.414862	0.255371	0.682724	0.338295
TCGA-97-8174	164	1	0.0515882	0.136472	0.0792716	0.0126105	0.0832363	0.264102	0.0571184	0.158129	0.092977	0.026831	0.0990856	0.0752461	0.194186	0.0791608	0.0960867	0.0684914	0.0185474	0.0757874	0.16803	0.118418	0.254728	0.0951681	0.0520493	0.0688391	0.088912	0.0579798	0.102601	0.180636	0.298277	0.111786	0.0385276	0.050149	0.0791608	0.0853643	0.0164997	0.180636	0.085313	0.0944322	0.0754486	0.0199179	0.0520493	0.0350643	0.0515882	0.136472	0.187373	0.367912	0.16791
TCGA-97-A4M5	634	0	0.0726335	0.18997	0.0316458	0.0205502	0.0949457	0.273932	0.0718906	0.159711	0.131588	0.0218719	0.145392	0.0466236	0.234541	0.131221	0.119492	0.0524863	0.0322537	0.10587	0.237816	0.15466	0.244181	0.103229	0.0418537	0.0941518	0.0748375	0.0596107	0.117735	0.0812403	0.137306	0.0567101	0.0327899	0.0310631	0.131221	0.0205446	0.0268735	0.0812403	0.101189	0.0852365	0.0654794	0.0191811	0.0418537	0.0387967	0.0726335	0.18997	0.121313	0.464493	0.143051
TCGA-44-8117	385	0	0.346634	0.245233	0.0353264	0.00887923	0.341802	0.145478	0.0448133	0.51759	0.645352	0.484785	0.0693814	0.0414479	0.200268	0.593547	0.353097	0.048405	-0.00266831	0.0623219	0.123905	0.103696	0.633943	0.0441767	0.467144	0.341892	0.423733	0.0831007	0.601627	0.589162	0.727154	0.39858	0.542614	0.500684	0.593547	0.71777	0.615262	0.589162	0.388769	0.460372	0.038484	0.623515	0.467144	0.72599	0.346634	0.245233	0.523783	0.839097	0.21563
TCGA-78-7220	807	1	0.192722	0.483711	0.0567326	0.0119054	0.116063	0.350765	0.584212	0.199211	0.127082	0.019699	0.101091	0.0539674	0.377103	0.0449813	0.398818	0.0707177	0.0204401	0.554437	0.458974	0.51611	0.0855033	0.186841	0.0160027	0.0809522	0.225426	0.748058	0.0690697	0.030695	0.0650944	0.0503865	0.0392596	0.042551	0.0449813	0.046809	0.00880971	0.030695	0.0823737	0.0949538	0.0381193	0.0232871	0.0160027	0.0388823	0.192722	0.483711	0.118836	0.715813	0.168157
TCGA-69-7760	202	0	0.0640945	0.0696325	0.0475211	0.0234649	0.0898142	0.141705	0.0600092	0.13737	0.101623	0.0215525	0.0943699	0.0538623	0.0878153	0.0560504	0.128784	0.0507049	0.0147738	0.0669289	0.111736	0.114065	0.0450431	0.0847933	0.0364203	0.0463945	0.163744	0.0557881	0.0689633	0.0402733	0.0466454	0.0495066	0.0283531	0.0172879	0.0560504	0.0476205	0.147353	0.0402733	0.245077	0.0692235	0.0806486	0.0169133	0.0364203	0.0393554	0.0640945	0.0696325	0.0653189	0.666553	0.0394132
TCGA-78-7154	593	1	0.0409376	0.606044	0.0413608	0.0196928	0.080773	0.185726	0.0438699	0.194725	0.109282	0.024803	0.24009	0.0505894	0.677706	0.0570411	0.520212	0.0549128	0.0137555	0.631865	0.468787	0.195065	0.122637	0.0729312	0.157217	0.390536	0.527779	0.522861	0.0743526	0.355759	0.057089	0.128418	0.0160148	0.0283659	0.0570411	0.0385334	0.485306	0.355759	0.0561566	0.0554869	0.0491029	0.0240977	0.157217	0.0413286	0.0409376	0.606044	0.544178	0.815948	0.190892
TCGA-50-6591	119	1	0.0807878	0.595721	0.0470129	0.0335465	0.0919172	0.596376	0.0611219	0.391501	0.103513	0.0120772	0.292398	0.0556308	0.554867	0.0372311	0.0802277	0.754076	0.0485844	0.343466	0.235983	0.149354	0.031612	0.595653	0.00677407	0.0554887	0.0638902	0.0524339	0.0817768	0.00923634	0.0368473	0.0611277	0.0227946	0.016237	0.0372311	0.0477706	0.00850797	0.00923634	0.0691359	0.115962	0.0607123	0.0281607	0.00677407	0.329181	0.0807878	0.595721	0.218705	0.850822	0.0651381
TCGA-69-8255	129	0	0.245486	0.432542	0.0508398	0.0230811	0.072586	0.220052	0.195706	0.28193	0.0829876	0.0168	0.111913	0.068143	0.373394	0.0773396	0.562112	0.072301	0.018079	0.513424	0.219308	0.434593	0.0808041	0.202278	0.0359761	0.109402	0.495664	0.540424	0.0939774	0.118666	0.0952724	0.0269715	0.0265734	0.032718	0.0773396	0.0619717	0.0202814	0.118666	0.102258	0.0553885	0.0797758	0.0564368	0.0359761	0.0766648	0.245486	0.432542	0.41369	0.729868	0.212445
TCGA-62-8399	2696	0	0.17957	0.102517	0.033408	0.011701	0.101127	0.203862	0.0509539	0.165144	0.212596	0.0209525	0.0664084	0.0466102	0.115509	0.0766735	0.0501521	0.15788	0.020482	0.110171	0.127196	0.118247	0.286045	0.093551	0.0186813	0.494569	0.0613826	0.0498073	0.233833	0.0437224	0.301179	0.0507	0.0151683	0.120039	0.0766735	0.0624837	0.00952524	0.0437224	0.0874045	0.0582504	0.0584609	0.029276	0.0186813	0.390259	0.17957	0.102517	0.111425	0.49281	0.0671313
TCGA-MN-A4N5	84	0	0.149085	0.138501	0.0489358	0.0148974	0.180478	0.130398	0.0434139	0.117996	0.278865	0.0150014	0.111329	0.0528613	0.160762	0.401187	0.0684213	0.0484979	0.0226345	0.0974738	0.25431	0.159677	0.303134	0.0785028	0.0293148	0.0571715	0.0779444	0.0459095	0.076123	0.337096	0.49455	0.287609	0.0217362	0.034728	0.401187	0.0737549	0.0629313	0.337096	0.254894	0.177617	0.0628781	0.0219667	0.0293148	0.0507933	0.149085	0.138501	0.238557	0.620575	0.235679
TCGA-78-7156	976	1	0.0413487	0.0583215	0.0407211	0.0123836	0.0967155	0.102652	0.0458297	0.121824	0.0922838	0.00726129	0.0654841	0.0405024	0.0706108	0.0309006	0.0577104	0.0357982	0.0395616	0.0455646	0.0828311	0.0878318	0.0946312	0.0592411	0.0335294	0.040207	0.0640264	0.0420395	0.050792	0.0192994	0.0878357	0.0644098	0.0271163	0.0155571	0.0309006	0.0422695	0.0127968	0.0192994	0.0766118	0.0431543	0.0388911	0.0302973	0.0335294	0.0509278	0.0413487	0.0583215	0.0815702	0.224127	0.0329105
TCGA-62-A46V	2199	0	0.457964	0.0885068	0.0560164	0.0218816	0.422646	0.233745	0.05545	0.142922	0.537826	0.408607	0.137463	0.0613345	0.116928	0.458399	0.110378	0.0718589	0.0312577	0.0617304	0.162362	0.157786	0.579491	0.0782924	0.489527	0.0938764	0.0963517	0.0814593	0.100616	0.47217	0.544499	0.49352	0.0356586	0.363911	0.458399	0.528108	0.562719	0.47217	0.43609	0.503916	0.385893	0.0631536	0.489527	0.0438361	0.457964	0.0885068	0.565381	0.372429	0.150418
TCGA-86-8076	993	0	0.0473281	0.192995	0.036824	0.00757177	0.230532	0.0779297	0.0490878	0.101426	0.280166	0.0724358	0.0698202	0.0608088	0.239173	0.334783	0.0884388	0.0414228	0.0105415	0.163425	0.130836	0.201803	0.310315	0.0815913	0.0431956	0.063095	0.0771845	0.0525317	0.0885959	0.173136	0.258578	0.0374514	0.0233117	0.0272626	0.334783	0.104414	0.0909317	0.173136	0.0574294	0.237617	0.0853504	0.0285231	0.0431956	0.0196675	0.0473281	0.192995	0.214987	0.537757	0.181173
TCGA-64-5775	62	1	0.026613	0.165575	0.0703208	0.0349425	0.0906838	0.0874761	0.0676754	0.117439	0.0820562	0.00337612	0.072184	0.0579736	0.18786	0.0306529	0.0391905	0.136624	0.0702045	0.355528	0.272175	0.689495	0.345902	0.215055	0.0156937	0.050389	0.053897	0.0533336	0.536984	0.0302629	0.0510389	0.0446831	0.0234239	0.0327356	0.0306529	0.0583248	0.0121828	0.0302629	0.118376	0.0769161	0.0329276	0.0132188	0.0156937	0.0516124	0.026613	0.165575	0.624452	0.575746	0.280596
TCGA-78-7149	3940	0	0.0537381	0.0733823	0.0387522	0.0148687	0.168529	0.136076	0.0722234	0.14318	0.216152	0.0345295	0.110259	0.0536714	0.0794348	0.134333	0.0762255	0.0549869	0.0789418	0.0971608	0.147356	0.169701	0.449078	0.0648835	0.0407917	0.111825	0.0763146	0.103612	0.363996	0.216863	0.495288	0.0562639	0.0361862	0.0284719	0.134333	0.0627751	0.0102962	0.216863	0.102496	0.0902114	0.0758974	0.0290677	0.0407917	0.0262573	0.0537381	0.0733823	0.143527	0.281021	0.0600527
TCGA-55-8090	598	1	0.0451921	0.126669	0.0356727	0.00515766	0.48321	0.197083	0.0397976	0.0510348	0.541711	0.017126	0.0718683	0.0644098	0.132033	0.425563	0.0512251	0.0412713	0.0207102	0.0683195	0.0863309	0.0989976	0.593725	0.0483271	0.00523216	0.217231	0.0682961	0.0503498	0.589281	0.213711	0.489668	0.113013	0.0540296	0.00624342	0.425563	0.0226063	0.09484	0.213711	0.133622	0.169214	0.0510923	0.00171515	0.00523216	-0.00342452	0.0451921	0.126669	0.51496	0.729025	0.211517
TCGA-55-6972	1632	1	0.0406199	0.0408292	0.0370625	0.00429735	0.0647761	0.0585794	0.086363	0.105269	0.209279	0.0137471	0.0637155	0.0433644	0.0629084	0.103819	0.0587173	0.0420462	0.0310519	0.0419793	0.0695557	0.0784218	0.0417728	0.0529459	0.0215977	0.0420571	0.0717111	0.0451798	0.0647106	0.0143769	0.143911	0.0411389	0.022578	0.0225214	0.103819	0.0501344	0.0103304	0.0143769	0.060032	0.0612994	0.0437255	0.00994823	0.0215977	0.0553858	0.0406199	0.0408292	0.0870085	0.127844	0.0326975
TCGA-55-8512	607	1	0.0389068	0.140124	0.0489352	0.011495	0.0783638	0.208559	0.0358447	0.0926611	0.139555	0.0341877	0.179917	0.0446644	0.157942	0.090805	0.0769901	0.0386091	0.00500742	0.0562792	0.116072	0.0901256	0.0681665	0.0949181	0.0268408	0.0538657	0.0736054	0.0501372	0.0940312	0.0282153	0.312367	0.0164465	0.0314875	0.0315428	0.090805	0.0454263	0.0197458	0.0282153	0.0842324	0.0882728	0.0660424	0.0207181	0.0268408	0.0506184	0.0389068	0.140124	0.0767559	0.419962	0.134868
TCGA-78-7537	1622	1	0.414777	0.122897	0.0420054	0.0141121	0.207239	0.126223	0.0743897	0.124721	0.553486	0.0446711	0.10236	0.0758303	0.149774	0.398879	0.110777	0.0511009	0.011386	0.126502	0.12796	0.177041	0.752984	0.105526	0.0399738	0.0779442	0.095496	0.0687084	0.574463	0.12283	0.258902	0.0876008	0.0192075	0.0170397	0.398879	0.0769264	0.0205393	0.12283	0.118028	0.585467	0.316822	0.0192658	0.0399738	0.0110595	0.414777	0.122897	0.152679	0.364648	0.104499
TCGA-55-6969	1239	0	0.110042	0.273898	0.0508467	0.0432609	0.096295	0.226145	0.0725643	0.133655	0.13171	0.0769504	0.146843	0.171205	0.372339	0.204088	0.113044	0.0852606	0.0879981	0.377791	0.249745	0.261823	0.106735	0.167342	0.0580542	0.193106	0.0986731	0.0681196	0.111004	0.132729	0.121187	0.0990935	0.0419184	0.0155702	0.204088	0.065415	0.0165408	0.132729	0.129641	0.112581	0.129332	0.0166077	0.0580542	0.282367	0.110042	0.273898	0.315459	0.667422	0.278357
TCGA-78-7633	1528	1	0.0415102	0.0728844	0.0567358	0.00374358	0.149675	0.116798	0.0765638	0.0872196	0.181523	0.00702174	0.123653	0.0342659	0.101277	0.198245	0.0246749	0.0371707	0.00261158	0.0573631	0.0888587	0.104913	0.724774	0.0764488	0.00510322	0.0404213	0.0637388	0.0485112	0.0699061	0.00925198	0.082092	0.0397845	0.0269817	0.0190936	0.198245	0.0144305	0.00664639	0.00925198	0.0639832	0.0555549	0.0522074	0.0146378	0.00510322	0.0545037	0.0415102	0.0728844	0.066235	0.249777	0.0412958
TCGA-95-A4VK	651	0	0.109348	0.472657	0.0720919	0.0163125	0.0969429	0.171331	0.0632991	0.192459	0.0936551	0.0400776	0.112265	0.0514465	0.38343	0.0830073	0.111962	0.0738856	0.020009	0.182396	0.258422	0.554847	0.459674	0.090848	0.033209	0.362949	0.087279	0.118743	0.114213	0.084024	0.121297	0.0636607	0.0281696	0.0330238	0.0830073	0.0485586	0.049191	0.084024	0.0716281	0.339573	0.0720149	0.0334926	0.033209	0.331764	0.109348	0.472657	0.147551	0.741038	0.163474
TCGA-50-5931	434	1	0.213934	0.241293	0.0576824	0.0158659	0.103667	0.434875	0.0653491	0.315902	0.0999949	0.0253815	0.260384	0.0612764	0.252822	0.0531661	0.672608	0.339589	0.0250837	0.217788	0.187183	0.231473	0.0147541	0.280376	0.0188157	0.076003	0.521133	0.068242	0.0744265	0.022644	0.0535956	0.0547951	0.0220823	0.00740435	0.0531661	0.0609799	0.00511433	0.022644	0.0704828	0.0761816	0.0684582	0.0140357	0.0188157	0.255162	0.213934	0.241293	0.256563	0.815097	0.378921
TCGA-MP-A4TI	429	1	0.0451198	0.266628	0.0455026	0.0179514	0.168082	0.217871	0.0532727	0.103148	0.24748	0.0332585	0.268546	0.0352943	0.327237	0.125787	0.122015	0.0594518	0.0322144	0.0693464	0.275542	0.226928	0.387441	0.0643012	0.0305961	0.0746695	0.0592644	0.0362357	0.0684936	0.375405	0.122432	0.0410972	0.0190732	0.321355	0.125787	0.0350528	0.193088	0.375405	0.414186	0.0799338	0.0488988	0.0372742	0.0305961	0.0327104	0.0451198	0.266628	0.417311	0.698107	0.272506
TCGA-55-8616	48	0	0.0676016	0.190287	0.0264301	0.0205782	0.242563	0.135566	0.0331787	0.0803184	0.468697	0.359237	0.111186	0.0524677	0.222452	0.491711	0.0524096	0.0412248	0.0159944	0.167073	0.152769	0.133114	0.585285	0.0808974	0.124273	0.111727	0.0553128	0.0496744	0.510888	0.462418	0.207867	0.0450424	0.0314015	0.488582	0.491711	0.0349466	0.406871	0.462418	0.279501	0.203473	0.0789053	0.0178567	0.124273	0.621406	0.0676016	0.190287	0.358761	0.301947	0.1638
TCGA-86-A456	896	0	0.0688392	0.165068	0.0702284	0.0217101	0.412603	0.185297	0.0750136	0.128813	0.470787	0.0603869	0.133002	0.0708671	0.195398	0.444332	0.122756	0.071284	0.0163076	0.0666953	0.192122	0.157539	0.381575	0.102013	0.202951	0.216287	0.234476	0.0764811	0.0981091	0.313245	0.42232	0.230825	0.0318315	0.322487	0.444332	0.360945	0.369282	0.313245	0.345373	0.307492	0.28195	0.0882149	0.202951	0.351104	0.0688392	0.165068	0.292688	0.424099	0.335246
TCGA-62-A46S	1653	1	0.127911	0.111095	0.0592463	0.0197776	0.12509	0.160997	0.0680632	0.120877	0.147354	0.0618766	0.111341	0.0653388	0.148072	0.214941	0.115059	0.0632867	0.0366037	0.0866434	0.156146	0.223612	0.179334	0.125805	0.0494375	0.0735798	0.0897313	0.0704555	0.135437	0.134596	0.190871	0.0853241	0.0391811	0.155018	0.214941	0.118711	0.346233	0.134596	0.106301	0.124895	0.15121	0.0603005	0.0494375	0.0978034	0.127911	0.111095	0.13805	0.408102	0.151557
TCGA-62-A46R	1725	1	0.172455	0.188728	0.0559027	0.0105728	0.347027	0.121877	0.0669568	0.10929	0.484423	0.0679856	0.210618	0.0672328	0.249548	0.559992	0.107577	0.0658374	0.0234562	0.136446	0.256884	0.190282	0.573617	0.0779737	0.383959	0.298396	0.156219	0.0490608	0.491066	0.49072	0.559245	0.115844	0.0827686	0.496907	0.559992	0.179025	0.0524495	0.49072	0.171762	0.181273	0.342862	0.0444318	0.383959	0.539693	0.172455	0.188728	0.463793	0.522887	0.21206
TCGA-64-5778	1305	0	0.0583229	0.180824	0.0351514	0.0216127	0.107701	0.075161	0.0571388	0.084017	0.384857	0.0150112	0.133562	0.047625	0.223724	0.439722	0.0579991	0.0434584	0.0259522	0.116104	0.175805	0.145833	0.476882	0.0543338	0.0255567	0.0918539	0.061047	0.0457655	0.184188	0.0389844	0.306294	0.0504112	0.0188713	0.0167267	0.439722	0.0536123	0.021196	0.0389844	0.079677	0.037019	0.0683404	0.017102	0.0255567	0.0131593	0.0583229	0.180824	0.382007	0.5377	0.147898
TCGA-50-6597	1268	1	0.0514859	0.176289	0.038627	0.0107312	0.404786	0.101922	0.0530983	0.116063	0.454742	0.0231261	0.0969719	0.0706038	0.197683	0.0777489	0.0724144	0.0643121	0.00546191	0.125991	0.441988	0.148819	0.589718	0.0708996	0.0299886	0.0570094	0.0800214	0.0496864	0.0628162	0.0716818	0.10295	0.184012	0.027632	0.0374824	0.0777489	0.0529659	0.38298	0.0716818	0.0624479	0.0962531	0.0713791	0.0225097	0.0299886	0.0428257	0.0514859	0.176289	0.158068	0.344384	0.125258
TCGA-86-7713	1157	0	0.0635221	0.0987497	0.0698976	0.0173924	0.176184	0.115909	0.0775398	0.151079	0.35002	0.0111363	0.103183	0.0620398	0.151038	0.12024	0.0933736	0.0626578	0.0161968	0.114432	0.263423	0.333111	0.690708	0.158605	0.0151352	0.0532598	0.0939205	0.0794863	0.0689183	0.034296	0.09448	0.0599886	0.0276306	0.0217041	0.12024	0.0677848	0.050411	0.034296	0.103391	0.0744059	0.0821592	0.0277635	0.0151352	0.020547	0.0635221	0.0987497	0.200258	0.50107	0.167657
TCGA-53-7813	424	0	0.0666735	0.15712	0.0470566	0.0189324	0.117233	0.1086	0.0620584	0.118266	0.204311	0.113485	0.0594692	0.03798	0.157823	0.0763123	0.111977	0.0407264	0.0240456	0.243872	0.261172	0.207439	0.296488	0.0815793	0.0815716	0.0632484	0.116455	0.0554996	0.0843104	0.158971	0.13395	0.0472627	0.0365096	0.0322497	0.0763123	0.100707	0.0369829	0.158971	0.102816	0.0628472	0.101212	0.0287871	0.0815716	0.0388046	0.0666735	0.15712	0.209343	0.648208	0.144935
TCGA-97-8172	545	0	0.0811067	0.181483	0.0500878	0.0144004	0.271587	0.204377	0.0574757	0.12984	0.293333	0.0382429	0.0928787	0.0611776	0.205888	0.119097	0.0833428	0.058124	0.0252405	0.216778	0.198734	0.152747	0.523182	0.114142	0.061642	0.0849115	0.0764819	0.0670552	0.0870948	0.106463	0.377604	0.0693448	0.0291379	0.0321065	0.119097	0.0519928	0.138566	0.106463	0.0879108	0.306694	0.0755354	0.0304015	0.061642	0.15987	0.0811067	0.181483	0.200405	0.409576	0.157253
TCGA-71-6725	256	0	0.0646727	0.0930802	0.0316802	0.0166611	0.167402	0.112086	0.0704113	0.111162	0.336758	0.0283342	0.0938354	0.0466337	0.0783765	0.381114	0.0624502	0.0384727	0.0167211	0.0923842	0.0723471	0.0919711	0.627696	0.0652773	0.0208377	0.09515	0.0853654	0.0574919	0.0985815	0.0423092	0.472548	0.0690677	0.0308514	0.198356	0.381114	0.0376401	0.021943	0.0423092	0.0966546	0.405836	0.0601992	0.024664	0.0208377	0.318196	0.0646727	0.0930802	0.157108	0.530937	0.147667
TCGA-67-6217	422	0	0.0682438	0.188225	0.0461238	0.00695959	0.134787	0.14252	0.0728487	0.0838125	0.328511	0.0232429	0.10578	0.0431877	0.194594	0.337204	0.104228	0.071832	0.00496585	0.124343	0.182501	0.170912	0.39927	0.0719193	0.222707	0.0692413	0.107466	0.051226	0.0746838	0.0608408	0.339704	0.109153	0.0233139	0.308532	0.337204	0.045878	0.0328462	0.0608408	0.091436	0.153852	0.153678	0.0165309	0.222707	0.258696	0.0682438	0.188225	0.194456	0.394911	0.18502
TCGA-NJ-A4YF	2161	0	0.0384755	0.132877	0.0603818	0.0244795	0.0994001	0.176472	0.0685947	0.136567	0.0927589	0.0188513	0.13685	0.0485187	0.113537	0.106618	0.121823	0.0715968	0.0315469	0.0917939	0.135297	0.132868	0.0806176	0.0697236	0.0268207	0.0599169	0.0589626	0.221757	0.0586229	0.258535	0.0950503	0.0998732	0.0408887	0.034375	0.106618	0.0604101	0.0409911	0.258535	0.061909	0.077664	0.0693662	0.0256115	0.0268207	0.0377053	0.0384755	0.132877	0.151095	0.807709	0.15308
TCGA-62-A471	1246	0	0.458037	0.334529	0.348401	0.0186873	0.104201	0.309138	0.0718383	0.176708	0.0834002	0.0256133	0.254829	0.0698879	0.333099	0.0709903	0.349562	0.092555	0.427336	0.513927	0.597391	0.606649	0.292098	0.224937	0.0358072	0.39928	0.191332	0.484367	0.140856	0.339603	0.112623	0.0883095	0.0253656	0.0568323	0.0709903	0.0771199	0.345618	0.339603	0.121126	0.128716	0.109754	0.0442281	0.0358072	0.230236	0.458037	0.334529	0.179784	0.799633	0.206522
TCGA-99-7458	747	0	0.0853773	0.183139	0.0564975	0.0163437	0.156744	0.190829	0.0528707	0.130691	0.291558	0.0379949	0.138683	0.0595261	0.224228	0.327009	0.0847412	0.0381686	0.0155292	0.0775162	0.239051	0.155806	0.425416	0.101628	0.0433461	0.100071	0.0614954	0.0522901	0.0960814	0.106901	0.404329	0.104399	0.0663677	0.114474	0.327009	0.119277	0.167233	0.106901	0.164964	0.130707	0.0951925	0.0331725	0.0433461	0.0450842	0.0853773	0.183139	0.302424	0.418229	0.234491
TCGA-55-7281	872	0	0.0392822	0.129813	0.0599247	0.0156347	0.216158	0.172274	0.0559786	0.0991253	0.407273	0.0193278	0.109212	0.0490916	0.140448	0.413388	0.102614	0.0547756	0.0296844	0.0730861	0.132539	0.0991646	0.297198	0.0801148	0.070676	0.0516229	0.0524193	0.0489363	0.0939654	0.496894	0.166694	0.0767946	0.0295687	0.018998	0.413388	0.0665635	0.0223008	0.496894	0.0923214	0.272316	0.0623026	0.0146657	0.070676	0.448836	0.0392822	0.129813	0.13081	0.389322	0.105814
TCGA-50-5051	478	1	0.0881879	0.0927581	0.0534582	0.0090841	0.0833021	0.16265	0.0712938	0.100857	0.131158	0.0881588	0.121292	0.0515017	0.117113	0.0901403	0.148616	0.0464638	0.0335457	0.162563	0.276924	0.107841	0.309315	0.0750775	0.344747	0.0660475	0.0754062	0.0514254	0.11369	0.140417	0.0569568	0.130784	0.0125854	0.0689148	0.0901403	0.0512426	0.0599111	0.140417	0.103185	0.102739	0.0428545	0.020258	0.344747	0.535553	0.0881879	0.0927581	0.129905	0.759425	0.407057
TCGA-97-A4LX	614	0	0.123302	0.321628	0.063173	0.00845934	0.104917	0.175055	0.0735641	0.139038	0.201386	0.0595293	0.138006	0.249571	0.353874	0.10482	0.153394	0.0607858	0.0289192	0.183495	0.237001	0.23164	0.121618	0.0864104	0.0851411	0.101013	0.0826962	0.0511008	0.0908208	0.0709826	0.211688	0.0628758	0.0286128	0.128665	0.10482	0.0622093	0.258588	0.0709826	0.0993083	0.0994388	0.0878058	0.0336816	0.0851411	0.0503264	0.123302	0.321628	0.275177	0.61477	0.271982
TCGA-55-8620	375	1	0.188392	0.62435	0.0288834	0.0117159	0.0628058	0.209699	0.041698	0.25903	0.0594975	0.0535411	0.519182	0.59668	0.597363	0.0432844	0.0467428	0.413047	0.0118372	0.576382	0.535824	0.117298	0.602181	0.385019	0.0707273	0.590993	0.0917144	0.0445661	0.0585013	0.0348272	0.199326	0.0389926	0.0253691	0.132204	0.0432844	0.0504008	0.53732	0.0348272	0.0600932	0.0524936	0.091062	0.00830378	0.0707273	0.331591	0.188392	0.62435	0.15793	0.761367	0.305453
TCGA-49-6742	488	1	0.338826	0.490225	0.330618	0.0111703	0.0600719	0.332229	0.492654	0.389415	0.107447	0.0161399	0.160457	0.0529876	0.442984	0.0646102	0.184387	0.0457692	0.424073	0.313433	0.402793	0.427442	0.0651873	0.141635	0.0120632	0.425634	0.0881814	0.701109	0.0929758	0.0310745	0.0670165	0.0447305	0.026392	0.0167438	0.0646102	0.0500618	0.00960423	0.0310745	0.0545717	0.0513291	0.0766038	0.0238964	0.0120632	0.0495866	0.338826	0.490225	0.181547	0.720748	0.137239
TCGA-44-7670	882	0	0.0363881	0.547116	0.044284	0.0142698	0.086503	0.134785	0.0592917	0.120808	0.105325	0.0152855	0.0970503	0.0581482	0.566881	0.0567871	0.0922237	0.162904	0.0171209	0.221638	0.166622	0.105721	0.0501453	0.108927	0.0232366	0.264868	0.0648402	0.0551023	0.559313	0.0342165	0.0629631	0.485285	0.0293946	0.0221279	0.0567871	0.0372813	0.00760236	0.0342165	0.0618743	0.0587635	0.0575687	0.0148042	0.0232366	0.0941133	0.0363881	0.547116	0.269977	0.447881	0.0803967
TCGA-73-7498	1189	0	0.048543	0.0973942	0.0597126	0.0260201	0.105151	0.169618	0.0383359	0.119514	0.107398	0.014743	0.106301	0.0347578	0.118278	0.1582	0.0500101	0.0290388	0.0187979	0.0858289	0.137049	0.121228	0.192257	0.154128	0.0117848	0.0837125	0.0648047	0.0611759	0.0629629	0.0635396	0.343916	0.0457018	0.0326496	0.0255426	0.1582	0.028464	0.00037685	0.0635396	0.0783977	0.0775536	0.052592	0.02397	0.0117848	0.0449811	0.048543	0.0973942	0.101325	0.333051	0.0820778
TCGA-05-5423	151	0	0.0462739	0.124937	0.046479	0.0327461	0.129556	0.135804	0.0804345	0.150846	0.466483	0.0237053	0.0701078	0.0648374	0.149847	0.474165	0.193868	0.0679457	0.0635529	0.122352	0.156607	0.168786	0.670239	0.0844913	0.0119089	0.0558526	0.0645402	0.0717247	0.0749431	0.0405129	0.409797	0.0724162	0.0217988	0.409253	0.474165	0.0621093	0.0122333	0.0405129	0.114315	0.0700337	0.0661711	0.0183782	0.0119089	0.0453725	0.0462739	0.124937	0.206875	0.376786	0.129885
TCGA-86-A4D0	116	1	0.126311	0.333059	0.0551174	0.0203333	0.116581	0.116681	0.0642058	0.150434	0.0677507	0.0244269	0.197708	0.343902	0.341222	0.159704	0.114305	0.0640105	0.0211728	0.63952	0.385181	0.223495	0.0822349	0.189947	0.052118	0.0662903	0.0760333	0.463825	0.0528661	0.0617361	0.0978545	0.0799757	0.0242015	0.0475489	0.159704	0.0616971	0.0290455	0.0617361	0.0860668	0.10449	0.0705563	0.0425862	0.052118	0.745482	0.126311	0.333059	0.1149	0.575625	0.18514
TCGA-MP-A4T7	167	1	0.13109	0.276809	0.0349354	0.0138638	0.111687	0.264543	0.0419192	0.117732	0.170149	0.0110063	0.0973959	0.0525644	0.218163	0.0629166	0.134332	0.0473687	0.013694	0.0767905	0.180249	0.291032	0.403388	0.150272	0.0173064	0.126363	0.0836193	0.542732	0.105366	0.0346495	0.143611	0.0388919	0.0140231	0.024585	0.0629166	0.0393934	0.231078	0.0346495	0.0523397	0.0987844	0.0753303	0.0217501	0.0173064	0.0321287	0.13109	0.276809	0.199681	0.538889	0.119901
TCGA-05-4433	730	0	0.0583765	0.150192	0.0603803	0.00341448	0.259939	0.157494	0.0581221	0.121476	0.334872	0.0283736	0.0939816	0.0693143	0.218923	0.567733	0.109129	0.073731	0.0360859	0.13606	0.254087	0.197581	0.402704	0.0629501	0.0235004	0.10579	0.0726956	0.0621327	0.0636196	0.046253	0.135679	0.0422436	0.0280373	0.294108	0.567733	0.0718833	0.0496302	0.046253	0.40009	0.0818526	0.0593507	0.0181219	0.0235004	0.0187254	0.0583765	0.150192	0.156485	0.675567	0.171519
TCGA-86-8359	444	1	0.0547647	0.176982	0.0461874	0.00781173	0.0776993	0.0937634	0.0504248	0.123111	0.0943459	0.00181101	0.0745066	0.0353624	0.201896	0.0412291	0.219411	0.031052	0.0162203	0.0765395	0.334622	0.116365	0.39123	0.0891479	0.00893439	0.0879292	0.0755065	0.0392881	0.0578024	0.056016	0.0523342	0.0386417	0.0203609	0.0274538	0.0412291	0.0370802	-0.00226272	0.056016	0.0666924	0.0809458	0.0519958	0.0166548	0.00893439	0.0155059	0.0547647	0.176982	0.194133	0.829809	0.130775
TCGA-78-7540	1197	1	0.0691161	0.104877	0.0383495	0.0106965	0.214711	0.177013	0.0589209	0.12858	0.351632	0.0245813	0.0799227	0.0400265	0.140779	0.443896	0.250674	0.0524194	0.00913333	0.0756324	0.169585	0.108859	0.625008	0.0937919	0.00959786	0.442557	0.0843106	0.0436423	0.0902058	0.0299513	0.169572	0.0555596	0.0207191	0.323635	0.443896	0.0236407	0.192446	0.0299513	0.167833	0.0816462	0.0542484	0.0129004	0.00959786	0.0326936	0.0691161	0.104877	0.136942	0.355148	0.138691
TCGA-86-8279	949	0	0.0702966	0.0728111	0.0786219	0.0161494	0.267652	0.162969	0.0753446	0.0947006	0.391462	0.0308842	0.0973861	0.0565732	0.104879	0.0861659	0.0928301	0.0488308	0.0466875	0.0937266	0.0748705	0.158054	0.484771	0.0850114	0.0361006	0.0665229	0.0827875	0.0758597	0.0773108	0.0554187	0.330523	0.0632633	0.0337094	0.0322428	0.0861659	0.0481713	0.0375851	0.0554187	0.0790888	0.0687959	0.111131	0.031922	0.0361006	0.0605859	0.0702966	0.0728111	0.167663	0.430463	0.0840675
TCGA-91-6835	79	0	0.201711	0.326219	0.0545	0.00733891	0.0966996	0.119324	0.0710549	0.111763	0.130087	0.103768	0.102187	0.0650271	0.399408	0.100784	0.135922	0.147413	0.0352316	0.284023	0.334636	0.239246	0.322376	0.113142	0.0569442	0.0888156	0.0849889	0.0364968	0.332744	0.0655358	0.170133	0.121825	0.0282727	0.0353789	0.100784	0.0621897	0.013132	0.0655358	0.123829	0.0819681	0.090788	0.0217704	0.0569442	0.0212537	0.201711	0.326219	0.401354	0.740912	0.269416
TCGA-64-5781	1559	0	0.380641	0.240215	0.240131	0.0398256	0.118684	0.369295	0.0658247	0.222689	0.305457	0.0378834	0.132662	0.0975926	0.25957	0.0737844	0.353964	0.108225	0.17004	0.236981	0.416532	0.462855	0.121946	0.187666	0.150952	0.451526	0.228455	0.506999	0.557885	0.368247	0.310567	0.0766718	0.0191572	0.0400312	0.0737844	0.116695	0.0161233	0.368247	0.110012	0.0488516	0.0577019	0.0177289	0.150952	0.0324493	0.380641	0.240215	0.308996	0.645581	0.39662
TCGA-86-7711	1046	1	0.17541	0.335601	0.0481335	0.0216218	0.0931347	0.308579	0.0584055	0.273806	0.125208	0.0209046	0.127381	0.0551	0.317795	0.0908731	0.115151	0.0551532	0.00737193	0.109323	0.260307	0.365079	0.114576	0.0940136	0.0170051	0.210048	0.097773	0.545226	0.377081	0.0501357	0.285868	0.0505779	0.0239877	0.0185525	0.0908731	0.0433432	0.00307345	0.0501357	0.100308	0.0631657	0.0733205	0.0253255	0.0170051	0.00705207	0.17541	0.335601	0.273364	0.841684	0.267557
TCGA-78-7152	1215	1	0.0979241	0.154933	0.0394929	0.0208012	0.0823199	0.092205	0.0444629	0.0992247	0.0928621	0.027572	0.0868569	0.0539673	0.179823	0.471259	0.104549	0.0483138	0.0220646	0.153348	0.119137	0.182905	0.530573	0.072726	0.0417707	0.106648	0.0826876	0.0500415	0.104511	0.300802	0.44647	0.0822693	0.0290725	0.316519	0.471259	0.0678853	0.0472282	0.300802	0.416625	0.343704	0.150951	0.0267208	0.0417707	0.0355723	0.0979241	0.154933	0.198021	0.380264	0.133047
TCGA-38-4631	354	1	0.450559	0.63603	0.0702049	0.0293983	0.123527	0.499563	0.480991	0.250088	0.130446	0.0201882	0.423216	0.0615941	0.665632	0.0626741	0.304793	0.201979	0.0301822	0.471898	0.594777	0.278205	0.0498482	0.171703	0.0149195	0.506617	0.297985	0.0624997	0.485796	0.049119	0.062069	0.0998827	0.0315985	0.0246993	0.0626741	0.0323411	0.032583	0.049119	0.0603593	0.0807412	0.0779899	0.0239485	0.0149195	0.36025	0.450559	0.63603	0.564563	0.81851	0.587759
[truncated: 14 more columns]
