# Supplementary material for: Molecular subtypes based on DNA promoter methylation predict prognosis in lung adenocarcinoma patients
Source: Aging (Albany NY). 2020 Nov 24;12(23):23917–30. doi: 10.18632/aging.104062 (PMC7762488; doi:10.18632/aging.104062)
Supplement: Supplementary Table 6 [file aging-12-104062-s006.xls]

Supplementary Table 6. The clinical information and follow-up data of patients.
Id	futime	fustat	age	gender	stage	T	M	N
TCGA-J2-8192	739	0	65	FEMALE	Stage IIA	T2a	MX	N1
TCGA-91-8499	36	0	76	FEMALE	Stage IA	T1b	MX	N0
TCGA-53-7624	1043	1	40	FEMALE	Stage IV	T2	M1	N0
TCGA-55-6986	3261	0	74	FEMALE	Stage IB	T2	M0	N0
TCGA-38-4632	1357	1	42	MALE	Stage IV	T2	M1	N1
TCGA-78-7146	173	1	71	FEMALE	Stage IIIA	T2	M0	N2
TCGA-NJ-A4YG	2261	0	65	MALE	Stage IB	T2	M0	N0
TCGA-86-8279	949	0	46	MALE	Stage IIA	T2a	M0	N1
TCGA-50-6591	119	1	63	FEMALE	Stage IV	T2	M1	N0
TCGA-50-5939	460	1	85	MALE	Stage IB	T2	M0	N0
TCGA-62-8402	1498	1	73	FEMALE	Stage IIIA	T2	M0	N2
TCGA-49-4506	999	1	68	FEMALE	Stage IIB	T2	M0	N1
TCGA-91-6847	842	0	62	FEMALE	Stage IB	T2	MX	N0
TCGA-97-8547	657	0	78	FEMALE	Stage IIIA	T2a	MX	N2
TCGA-97-7546	1285	0	76	FEMALE	Stage IA	T1	MX	N0
TCGA-73-4659	711	1	66	MALE	Stage IIIA	T2	M0	N2
TCGA-55-A48Y	630	0	69	MALE	Stage IIA	T2b	M0	N0
TCGA-50-5049	3094	0	70	MALE	Stage IA	T2	M0	N0
TCGA-44-3396	1130	0	74	FEMALE	Stage IIIA	T2	M0	N2
TCGA-05-4405	610	0	74	FEMALE	Stage IB	T2	M0	N0
TCGA-78-8662	3361	1	53	FEMALE	Stage IB	T2	M0	N0
TCGA-50-8460	829	0	74	MALE	Stage IA	T1a	M0	N0
TCGA-55-8087	462	0	59	FEMALE	Stage IB	T2a	MX	N0
TCGA-MP-A4TA	950	1	75	FEMALE	Stage IA	T1	M0	N0
TCGA-55-7815	773	0	76	MALE	Stage IB	T2a	MX	N0
TCGA-55-8096	719	1	67	FEMALE	Stage IB	T2a	MX	N0
TCGA-NJ-A55R	603	0	67	MALE	Stage IA	T1b	MX	N0
TCGA-91-7771	492	0	62	MALE	Stage IIB	T3	MX	N0
TCGA-69-7760	202	0	73	MALE	Stage IIB	T3	M0	N0
TCGA-44-5644	863	0	51	FEMALE	Stage IB	T2a	unknow	N0
TCGA-69-7973	230	0	42	FEMALE	Stage IB	T2a	M0	N0
TCGA-44-6145	595	0	62	FEMALE	Stage IA	T1	M0	N0
TCGA-64-1676	1728	0	58	MALE	Stage IA	T1a	M0	N0
TCGA-97-7553	1870	0	58	FEMALE	Stage IA	T1	MX	N0
TCGA-55-8511	552	0	73	FEMALE	Stage IB	T2a	MX	N0
TCGA-MP-A4TF	336	1	58	FEMALE	Stage IIA	T2b	M0	N0
TCGA-55-8204	515	0	87	FEMALE	Stage IB	T2a	MX	N0
TCGA-55-8616	48	0	58	FEMALE	Stage IB	T2a	M0	N0
TCGA-86-8281	0	0	75	MALE	Stage IA	T1	M0	NX
TCGA-55-7574	995	1	64	FEMALE	Stage IB	T2a	M0	N0
TCGA-L9-A743	664	0	56	MALE	Stage IIA	T2a	M0	N1
TCGA-73-4670	131	0	69	FEMALE	Stage IV	T2	M1	N0
TCGA-50-5066	1442	0	72	MALE	Stage IB	T2	M0	N0
TCGA-75-5126		0	unknow	FEMALE	Stage IIIA	T3	M0	N2
TCGA-64-5779	864	0	61	MALE	Stage IIIA	T2	M0	N2
TCGA-55-6543	435	0	60	FEMALE	Stage IA	T1b	MX	N0
TCGA-55-A48Z	651	0	60	FEMALE	Stage IIIB	T1a	MX	N3
TCGA-86-8278	944	0	63	FEMALE	Stage IIB	T2	M0	N1
TCGA-L4-A4E5	578	0	48	FEMALE	Stage I	T1	M0	N0
TCGA-49-4505	428	1	61	FEMALE	Stage IIB	T2	M0	N1
TCGA-69-7980	411	0	70	FEMALE	Stage I	T1b	M0	N0
TCGA-55-7725	442	0	68	FEMALE	Stage IA	T1a	MX	N0
TCGA-78-7162	3169	1	75	MALE	Stage IA	T1	M0	N0
TCGA-80-5608	2832	0	unknow	FEMALE	Stage IA	T1	M0	N0
TCGA-78-7159	1974	0	60	FEMALE	Stage IA	T1	M0	NX
TCGA-MP-A4TI	429	1	72	MALE	Stage IIA	T2a	M0	N1
TCGA-78-7542	321	1	56	MALE	Stage IB	T2	M0	N0
TCGA-91-6836	417	0	52	FEMALE	Stage IB	T2	MX	N0
TCGA-78-7537	1622	1	72	MALE	Stage IB	T2	M0	N0
TCGA-97-7941	484	0	72	FEMALE	Stage IA	T1b	MX	N0
TCGA-MP-A4TJ	339	1	62	FEMALE	Stage IA	T1	M0	N0
TCGA-78-8660	321	1	69	MALE	Stage IIB	T2	M0	N1
TCGA-49-AARQ	6732	0	41	FEMALE	Stage I	T2	MX	N0
TCGA-05-4415	91	1	57	MALE	Stage IIIB	T4	M0	N2
TCGA-86-A4JF	737	1	56	MALE	Stage IIB	T3	M0	N0
TCGA-86-7701	947	0	66	MALE	Stage IV	T2	M1	N0
TCGA-44-3918	1036	0	60	FEMALE	Stage IA	T1	M0	N0
TCGA-50-6597	1268	1	79	FEMALE	Stage IB	T2	M0	N0
TCGA-NJ-A4YI	4	1	87	FEMALE	Stage IIIA	T2	M0	N2
TCGA-86-8280	701	0	54	FEMALE	Stage IIA	T2b	M0	N0
TCGA-44-2666	97	1	43	MALE	Stage IB	T2	M0	N0
TCGA-78-7154	593	1	72	MALE	Stage IIIA	T3	M0	N2
TCGA-55-A491	626	0	81	FEMALE	Stage IA	T1b	MX	N0
TCGA-05-4390	1126	0	58	FEMALE	Stage IB	T2	M0	N0
TCGA-05-4382	607	0	68	MALE	Stage IB	T2	M0	N0
TCGA-55-8206	888	0	56	MALE	Stage IA	T1b	M0	N0
TCGA-55-7576	670	0	54	MALE	Stage IB	T2a	M0	N0
TCGA-55-8506	11	0	62	FEMALE	Stage IIB	T3	MX	N0
TCGA-50-5930	282	1	47	MALE	Stage IIIA	T2	M0	N2
TCGA-05-4403	578	0	76	MALE	Stage IB	T2	M0	N0
TCGA-55-7911	537	0	70	FEMALE	Stage IA	T1a	MX	N0
TCGA-78-7143	4961	1	62	FEMALE	Stage IB	T2	M0	N0
TCGA-62-A46P	594	1	65	MALE	Stage IB	T2	M0	N0
TCGA-95-8494	84	0	67	MALE	Stage IIA	T2a	M0	N1
TCGA-35-5375	264	0	61	MALE	Stage IIIA	T2	M0	N2
TCGA-78-7163	7248	0	60	MALE	Stage IB	T2	M0	N0
TCGA-05-4417	455	0	51	FEMALE	Stage IB	T2	M0	N0
TCGA-91-6828	323	0	70	MALE	Stage IA	T1a	M0	N0
TCGA-44-A47A	466	0	78	FEMALE	Stage IB	T2a	MX	N0
TCGA-L9-A443	193	1	63	FEMALE	Stage IA	T1a	MX	N0
TCGA-86-A4D0	116	1	48	MALE	Stage IIA	T2b	M0	N0
TCGA-44-A479	486	0	73	FEMALE	Stage IB	T2	MX	N0
TCGA-97-A4LX	614	0	81	MALE	Stage IB	T2a	M0	N0
TCGA-49-4486	2318	1	72	MALE	Stage IA	T1	M0	N0
TCGA-50-5932	1235	1	75	MALE	Stage IIB	T2	M0	N1
TCGA-86-8073	740	0	58	MALE	Stage IB	T2a	M0	N0
TCGA-NJ-A55O	13	0	56	FEMALE	Stage IIA	T1b	M0	N1
TCGA-55-A494	481	0	61	FEMALE	Stage IB	T2a	MX	N0
TCGA-69-7765	165	0	56	MALE	unknow	T4	MX	N0
TCGA-86-8672	19	1	59	MALE	Stage IIB	T3	M0	N0
TCGA-49-4488	869	1	74	FEMALE	Stage IA	T1	MX	N0
TCGA-55-7903	567	0	64	MALE	Stage IA	T1b	MX	N0
TCGA-MP-A4T2	1136	1	71	MALE	Stage IA	T1	M0	N0
TCGA-49-4487	855	1	72	FEMALE	Stage IA	T1	M0	N0
TCGA-99-8033	656	1	74	FEMALE	Stage IV	TX	M1	NX
TCGA-50-5068	1499	1	59	FEMALE	Stage IIB	T2	MX	N1
TCGA-55-6978	176	1	81	MALE	Stage IIA	T2b	MX	N0
TCGA-91-A4BC	44	0	59	MALE	Stage IIA	T2b	MX	N0
TCGA-49-4490	385	1	45	FEMALE	Stage IIIA	T3	M0	N2
TCGA-86-7955	1072	0	62	MALE	Stage IB	T2a	M0	N0
TCGA-05-4430	761	0	59	FEMALE	Stage IB	T2	M0	N0
TCGA-44-3398	1163	0	77	FEMALE	Stage IA	T1b	M0	N0
TCGA-49-4507	268	1	73	FEMALE	Stage IIIA	T3	M0	N1
TCGA-97-A4M5	634	0	83	MALE	Stage IA	T1b	M0	N0
TCGA-49-6745	522	0	82	MALE	Stage IIIA	T2a	M0	N2
TCGA-86-8674	806	0	50	MALE	Stage IIA	T2a	M0	N1
TCGA-05-4384	426	0	66	MALE	Stage IIIA	T2	M0	N2
TCGA-69-7979	408	0	71	FEMALE	Stage IB	T2a	MX	N0
TCGA-78-7147	586	1	67	FEMALE	Stage IIB	T2	M0	N1
TCGA-93-7347	683	0	76	FEMALE	Stage IA	T1a	MX	N0
TCGA-49-4514	1700	0	79	FEMALE	Stage IA	T1	M0	N0
TCGA-49-6742	488	1	70	MALE	Stage IIA	T2a	M0	N1
TCGA-MN-A4N1	827	0	60	MALE	Stage IIA	T2a	M0	N1
TCGA-J2-A4AD	550	1	61	FEMALE	Stage IA	T1a	MX	N0
TCGA-78-7160	697	1	61	MALE	Stage IV	T4	M1	N2
TCGA-05-4397	731	1	65	MALE	Stage IIB	T2	M0	N1
TCGA-91-8497	434	1	75	FEMALE	Stage IA	T1a	MX	N0
TCGA-55-7283	609	0	76	FEMALE	Stage IIIA	T3	MX	N2
TCGA-05-4244	0	0	70	MALE	Stage IV	T2	M1	N2
TCGA-91-6848	224	0	59	MALE	Stage IIIA	T2	MX	N2
TCGA-MP-A4TD	307	1	71	MALE	Stage IIIA	T2	M0	N2
TCGA-55-8620	375	1	60	MALE	Stage IV	T1a	M1b	N1
TCGA-97-7547	1965	0	67	FEMALE	Stage IB	T2	MX	N0
TCGA-44-6777	987	1	85	FEMALE	Stage IB	T2	MX	NX
TCGA-38-4629	864	1	68	MALE	Stage IIB	T3	M0	N0
TCGA-55-8097	476	0	60	FEMALE	Stage IA	T1a	MX	N0
TCGA-97-8179	435	0	72	MALE	Stage IA	T1a	M0	N0
TCGA-78-8648	1209	1	58	FEMALE	Stage IIB	T3	M0	N0
TCGA-75-5125	2027	1	unknow	MALE	Stage IIB	T2	M0	N1
TCGA-95-7944	377	0	71	MALE	Stage IA	T1a	M0	N0
TCGA-44-6147	845	0	67	FEMALE	Stage IA	T1b	M0	NX
TCGA-55-7727	119	0	70	MALE	Stage IIIA	T1a	MX	N2
TCGA-95-7039	1272	0	54	FEMALE	Stage IIB	T3	MX	N0
TCGA-55-6975	118	1	61	MALE	Stage IIB	T2	M0	N1
TCGA-05-4433	730	0	82	MALE	Stage IB	T2	M0	N0
TCGA-05-4427	791	0	65	FEMALE	Stage IIB	T2	M0	N1
TCGA-86-7711	1046	1	70	MALE	Stage IIA	T2a	M0	N1
TCGA-69-7761	186	0	84	MALE	Stage IB	T2a	MX	N0
TCGA-44-2661	1159	0	69	FEMALE	Stage IA	T1	M0	N0
TCGA-55-6981	1379	1	53	FEMALE	Stage IIIA	T1	M0	N2
TCGA-MP-A4TH	741	0	70	FEMALE	Stage IA	T1a	M0	N0
TCGA-55-8299	469	1	61	FEMALE	Stage IA	T1b	MX	N0
TCGA-L4-A4E6	435	0	67	MALE	Stage IA	T1	M0	N0
TCGA-44-A47F	337	0	74	MALE	Stage IIB	T2b	M0	N1
TCGA-55-7913	561	1	61	FEMALE	Stage IA	T1b	MX	N0
TCGA-38-4628	1492	1	65	FEMALE	Stage IIB	T2	M0	N1
TCGA-67-6215	174	0	52	FEMALE	Stage IB	T2a	M0	N0
TCGA-NJ-A7XG	617	0	49	MALE	Stage IIIA	T4	M0	N1
TCGA-67-3772	573	0	82	FEMALE	Stage IB	T2	M0	N0
TCGA-S2-AA1A	513	0	68	FEMALE	Stage IA	T1b	M0	N0
TCGA-49-6767	677	0	46	FEMALE	Stage IIB	T3	MX	N0
TCGA-55-6980	2109	0	56	MALE	Stage IA	T1	M0	N0
TCGA-44-6144	723	0	58	MALE	Stage IA	T1a	M0	N0
TCGA-44-5645	852	0	61	FEMALE	Stage IA	T1	unknow	NX
TCGA-MP-A4T7	167	1	75	FEMALE	Stage IV	T2	M1	N0
TCGA-62-A46V	2199	0	78	FEMALE	Stage IB	T2	M0	N0
TCGA-44-6774	658	0	56	FEMALE	Stage IIIA	T1	M0	N2
TCGA-55-8621	515	0	75	FEMALE	Stage IA	T1a	MX	N0
TCGA-05-4396	303	1	76	MALE	Stage IIIB	T4	M0	N1
TCGA-55-7573	487	0	72	FEMALE	Stage IA	T1b	MX	N0
TCGA-49-AARR	4992	0	68	MALE	Stage IA	T1	MX	N0
TCGA-97-A4M3	540	0	69	FEMALE	Stage IA	T1b	M0	N0
TCGA-49-AARO	3759	0	39	FEMALE	Stage IA	T1a	MX	N0
TCGA-91-6830	60	0	65	FEMALE	Stage IIA	T1	MX	N1
TCGA-38-6178	448	0	70	FEMALE	Stage IIIA	T2b	unknow	N2
TCGA-55-8091	600	0	74	MALE	Stage IB	T2	MX	N0
TCGA-55-8507	418	0	53	MALE	Stage IA	T1a	MX	N0
TCGA-75-7030		0	unknow	MALE	Stage IIB	T3	M0	N0
TCGA-86-A456	896	0	78	FEMALE	Stage IA	T1a	M0	N0
TCGA-55-A492	596	0	70	FEMALE	Stage IA	T1a	MX	N0
TCGA-64-1678	1189	0	70	FEMALE	unknow	T2b	M0	N0
TCGA-62-8399	2696	0	62	MALE	Stage IIIA	T2	M0	N2
TCGA-55-6985	1233	0	58	FEMALE	Stage IB	T2	MX	N0
TCGA-44-8120	260	0	58	MALE	Stage IB	T2a	M0	N0
TCGA-50-5935	653	1	86	FEMALE	Stage IA	T1	M0	N0
TCGA-50-5044	624	1	72	FEMALE	Stage IIIB	T4	M0	N1
TCGA-55-8085	904	0	64	MALE	Stage IA	T1b	M0	N0
TCGA-L9-A444	307	0	60	FEMALE	Stage IA	T1a	MX	N0
TCGA-55-8615	446	0	67	MALE	Stage IIIA	T3	MX	N2
TCGA-97-A4M0	652	0	60	FEMALE	Stage IB	T2a	M0	N0
TCGA-95-7562	87	1	71	MALE	Stage IIA	T2a	M0	N1
TCGA-38-4626	3674	0	57	FEMALE	unknow	T2b	M0	N0
TCGA-67-6216	141	0	57	FEMALE	Stage IA	T1a	M0	N0
TCGA-75-6203		0	unknow	FEMALE	Stage IIIA	T2	M0	N2
TCGA-67-3773	427	0	84	FEMALE	Stage IB	T2	M0	N0
TCGA-78-7161	291	1	69	FEMALE	Stage IIB	T3	M0	N0
TCGA-NJ-A4YQ	1432	0	69	FEMALE	Stage IA	T1b	M0	N0
TCGA-50-5072	250	1	74	MALE	Stage IIIA	T2	M0	N2
TCGA-50-5931	434	1	75	FEMALE	Stage IB	T2	M0	N0
TCGA-49-AARN	1135	1	56	FEMALE	Stage IA	T1	MX	N0
TCGA-64-1681	1167	1	61	FEMALE	Stage IA	T1	M0	N0
TCGA-99-7458	747	0	74	FEMALE	Stage IIIA	T4	M0	N0
TCGA-35-4122	225	0	69	MALE	Stage IA	T1	M0	N0
TCGA-55-7728	704	0	64	FEMALE	Stage IB	T2a	MX	N0
TCGA-44-7672	719	0	52	FEMALE	Stage IA	T1b	M0	N0
TCGA-44-7662	218	0	61	MALE	Stage IB	T2a	MX	N0
TCGA-86-7714	625	1	61	FEMALE	Stage IIIA	T1b	M0	N2
TCGA-97-7552	1932	0	70	MALE	Stage IB	T2	MX	N0
TCGA-44-5643	1013	0	53	MALE	Stage IIIA	T2b	M0	N2
TCGA-75-7025	3305	0	unknow	MALE	Stage IB	T2	M0	N0
TCGA-78-8655	2360	0	77	FEMALE	Stage IA	T1	M0	N0
TCGA-97-7937	564	0	65	MALE	Stage IB	T2a	MX	N0
TCGA-64-1679	2488	0	58	FEMALE	Stage IIIA	T1	M0	N2
TCGA-86-A4P8	805	0	59	FEMALE	Stage IIIA	T1b	MX	N2
TCGA-55-8205	599	0	76	FEMALE	Stage IIA	T2b	M0	N0
TCGA-44-2668	761	1	51	MALE	Stage IB	T2	M0	N0
TCGA-NJ-A4YP	50	0	52	MALE	Stage IB	T2a	M0	N0
TCGA-49-4494	1081	1	77	MALE	Stage IIIA	T3	M0	N2
TCGA-49-AAR9	260	1	61	MALE	Stage IIB	T3	MX	N0
TCGA-38-4625	2973	0	66	FEMALE	Stage IB	T2a	M0	N0
TCGA-44-7661	557	1	69	FEMALE	Stage IB	T2a	M0	N0
TCGA-55-7726	652	0	72	FEMALE	Stage IA	T1b	MX	N0
TCGA-75-6205		1	unknow	FEMALE	Stage IB	T2a	M0	N0
TCGA-55-6972	1632	1	72	MALE	Stage IB	T2	M0	N0
TCGA-86-8359	444	1	52	MALE	Stage IIIA	T3	M0	N2
TCGA-50-6673	22	1	84	FEMALE	Stage I	T1	M0	N0
TCGA-44-3917	1183	0	33	FEMALE	Stage IB	T2	M0	N0
TCGA-95-7567	568	0	61	MALE	Stage IIB	T2b	M0	N1
TCGA-97-8176	468	1	63	MALE	Stage IIIA	T3	M0	N1
TCGA-64-1677	628	1	77	FEMALE	Stage IIIA	T2	M0	N2
TCGA-50-5942	1847	0	67	FEMALE	Stage IA	T1	M0	N0
TCGA-38-4627	1147	1	64	FEMALE	Stage IIA	T1b	M0	N1
TCGA-86-8055	124	1	79	MALE	Stage IIA	T2a	M0	N1
TCGA-55-A4DF	440	1	88	MALE	Stage IA	T1b	MX	N0
TCGA-44-2664	1251	0	66	FEMALE	Stage IA	T1	M0	N0
TCGA-44-A47B	287	0	79	MALE	Stage IB	T2a	M0	N0
TCGA-62-A46R	1725	1	54	FEMALE	Stage IB	T2	M0	N0
TCGA-71-8520	210	1	60	FEMALE	Stage IB	T2	M0	N0
TCGA-80-5611	2595	0	unknow	MALE	Stage IB	T2	M0	N0
TCGA-05-4250	121	1	79	FEMALE	Stage IIIA	T3	M0	N1
TCGA-78-7158	179	1	59	FEMALE	Stage IIIB	T4	M0	N2
TCGA-53-7813	424	0	51	FEMALE	Stage IIIB	T4	M0	N0
TCGA-55-6970	464	1	67	FEMALE	Stage IIIA	T2	MX	N2
TCGA-73-A9RS	340	1	41	MALE	Stage IIB	T3	M0	N0
TCGA-69-7764	414	0	75	MALE	Stage IA	T1b	M0	N0
TCGA-55-8094	541	0	51	MALE	Stage IV	T2b	M1b	N0
TCGA-95-A4VN	553	0	62	FEMALE	Stage IIA	T2a	M0	N1
TCGA-69-8254	409	0	85	MALE	unknow	T2b	unknow	unknow
TCGA-49-AAR3	1893	0	69	MALE	Stage IIB	T2	MX	N1
TCGA-49-4510	896	1	51	FEMALE	Stage IIB	T2	M0	N1
TCGA-55-7281	872	0	70	FEMALE	Stage IA	T1b	M0	N0
TCGA-69-7763	690	0	69	MALE	Stage IA	T1b	M0	N0
TCGA-78-7148	626	1	71	MALE	Stage IIB	T2	M0	N1
TCGA-97-A4M7	629	0	74	MALE	Stage IA	T1b	M0	N0
TCGA-86-8668	423	0	61	FEMALE	Stage IA	T1b	M0	N0
TCGA-49-AAQV	677	1	63	FEMALE	Stage II	T1	MX	N1
TCGA-71-6725	256	0	48	FEMALE	Stage IB	T2	M0	N0
TCGA-55-7570	824	0	60	MALE	Stage IA	T1a	MX	N0
TCGA-05-4402	244	1	57	FEMALE	Stage IV	T2	M1	NX
TCGA-67-4679	448	0	69	MALE	unknow	T3	M0	N0
TCGA-05-4422	365	0	68	MALE	Stage IB	T2	M0	N0
TCGA-55-7227	952	1	77	MALE	Stage IIIA	T3	MX	N1
TCGA-55-1594	1178	0	68	MALE	Stage IIIA	T2	M0	N2
TCGA-49-AAR4	879	1	51	MALE	Stage IIIA	T2	MX	N2
TCGA-62-A46Y	414	1	70	FEMALE	Stage IIIA	T2	M0	N2
TCGA-86-8054	1148	0	61	MALE	Stage IIB	T2b	M0	N1
TCGA-62-A46S	1653	1	73	MALE	Stage IB	T2	M0	N0
TCGA-97-8177	499	0	59	FEMALE	Stage IB	T2a	M0	N0
TCGA-05-5425	882	0	68	MALE	Stage IIB	T2b	M0	N1
TCGA-49-6744	1683	0	64	FEMALE	Stage IIA	T2a	MX	N1
TCGA-44-6778	1864	0	59	MALE	Stage IA	T1	MX	N0
TCGA-75-6206	2590	0	unknow	MALE	Stage IB	T2	M0	N0
TCGA-80-5607		0	unknow	FEMALE	Stage IIB	T2	M0	N1
TCGA-NJ-A4YF	2161	0	50	FEMALE	Stage IA	T1	M0	N0
TCGA-78-7220	807	1	53	FEMALE	Stage IIIA	T2	M0	N2
TCGA-50-6595	189	1	74	FEMALE	Stage IIIA	T2	M0	N2
TCGA-78-7167	2681	1	77	MALE	Stage IV	T2	M1	N0
TCGA-95-7948	476	0	42	FEMALE	Stage IB	T2a	M0	N0
TCGA-75-6207		1	unknow	MALE	Stage IIIA	T2	M0	N2
TCGA-05-4389	1369	0	70	MALE	Stage IA	T1	M0	N0
TCGA-05-5429	275	1	60	MALE	Stage IIIA	T3	M0	N2
TCGA-55-7907	343	1	77	MALE	Stage IIA	T2a	MX	N1
TCGA-67-3776	61	0	57	FEMALE	Stage IIB	T2	M0	N1
TCGA-73-4677	38	1	74	MALE	unknow	T2a	M0	N0
TCGA-97-8172	545	0	75	FEMALE	Stage IB	T2a	M0	N0
TCGA-75-5147	1333	0	unknow	FEMALE	Stage IB	T2	M0	N0
TCGA-50-5045	2174	1	57	FEMALE	unknow	T2	M0	N1
TCGA-44-A4SU	409	1	67	FEMALE	Stage IA	T1a	MX	N0
TCGA-55-8301	534	0	58	MALE	Stage IB	T2a	MX	N0
TCGA-55-1596	2065	0	55	MALE	Stage IIB	T2	M0	N1
TCGA-55-A4DG	608	0	71	MALE	Stage IA	T1b	MX	N0
TCGA-49-AARE	1229	1	51	FEMALE	Stage IA	T1	MX	N0
TCGA-50-6592	777	1	71	FEMALE	Stage IB	T2	M0	N0
TCGA-J2-A4AG	988	0	66	FEMALE	Stage IA	T1b	MX	N0
TCGA-67-3771	610	0	77	FEMALE	Stage IA	T1	M0	N0
TCGA-73-4662	2515	0	65	FEMALE	Stage IA	T1	M0	N0
TCGA-05-5420	457	0	67	MALE	Stage IIIA	T2	M0	N2
TCGA-86-8056	139	0	63	FEMALE	Stage IIIA	T4	M0	N0
TCGA-J2-A4AE	1079	0	77	FEMALE	Stage IA	T1a	MX	N0
TCGA-44-7669	574	1	59	MALE	Stage IIA	T1b	MX	N1
TCGA-44-8119	285	0	73	MALE	Stage IIB	T3	M0	N0
TCGA-50-5941	1474	0	55	FEMALE	Stage IIIA	T2a	M0	N2
TCGA-64-5781	1559	0	55	FEMALE	Stage IB	T2	M0	N0
TCGA-73-4666	800	0	52	FEMALE	Stage IV	T1	M1	N0
TCGA-L9-A8F4	476	0	64	FEMALE	Stage IB	T2a	MX	N0
TCGA-69-8253	426	0	59	FEMALE	Stage IIA	T1a	MX	N1
TCGA-97-8552	626	0	55	FEMALE	Stage I	T1a	MX	N0
TCGA-44-6776	2616	0	60	FEMALE	Stage IA	T1	MX	N0
TCGA-L9-A5IP	58	1	40	FEMALE	Stage IV	T3	M1b	N2
TCGA-44-6148	704	0	60	MALE	Stage IA	T1b	M0	N0
TCGA-38-4630	1073	1	75	FEMALE	Stage IB	T2	M0	N0
TCGA-95-7947	477	0	67	MALE	Stage IA	T1a	M0	N0
TCGA-4B-A93V	300	1	52	FEMALE	Stage IA	T1b	M0	N0
TCGA-86-8076	993	0	42	MALE	Stage IA	T1	M0	N0
TCGA-05-4410	0	0	62	MALE	Stage IB	T2	M0	N0
TCGA-62-A472	910	0	70	MALE	Stage IIB	T3	M0	N0
TCGA-55-6968	1293	1	61	MALE	Stage IV	T1	M1	N0
TCGA-55-8514	520	0	70	FEMALE	Stage IB	T2a	MX	N0
TCGA-75-7031		0	unknow	FEMALE	Stage IB	T2	M0	N0
TCGA-62-8397	1289	0	70	FEMALE	Stage IIB	T3	M0	N0
TCGA-86-7953	997	0	69	FEMALE	Stage IA	T1b	M0	N0
TCGA-75-5146	2368	0	unknow	MALE	Stage IB	T2	M0	N0
TCGA-44-A47G	351	0	73	FEMALE	Stage IA	T1	M0	N0
TCGA-86-8671	839	0	72	FEMALE	Stage IIB	T2b	M0	N1
TCGA-86-8358	653	0	44	MALE	Stage IB	T2a	M0	N0
TCGA-93-A4JN	718	0	71	MALE	Stage IV	T2a	M1a	N0
TCGA-05-4432	761	0	66	MALE	Stage IIB	T2	M0	N1
TCGA-86-8669	938	0	64	MALE	Stage IA	T1b	M0	N0
TCGA-95-A4VK	651	0	74	FEMALE	Stage IIIA	T2b	M0	N2
TCGA-44-7670	882	0	47	FEMALE	Stage IIA	T1b	M0	N1
TCGA-73-7499	1531	1	81	FEMALE	Stage IB	T2a	M0	N0
TCGA-62-A46U	2067	0	71	FEMALE	Stage IIB	T2	M0	N1
TCGA-55-8508	617	0	60	FEMALE	Stage IIA	T2a	MX	N1
TCGA-44-2657	1351	0	74	FEMALE	Stage IB	T2	M0	NX
TCGA-97-8171	568	0	81	MALE	Stage IV	T2a	M1a	N2
TCGA-50-5944	1750	0	69	FEMALE	Stage IA	T1	M0	N0
TCGA-78-7633	1528	1	67	MALE	Stage IB	T2	M0	N0
TCGA-64-5775	62	1	71	MALE	Stage IIIA	T4	M0	N0
TCGA-J2-8194	724	0	69	FEMALE	Stage IIB	T3	MX	N0
TCGA-78-7539	791	0	75	FEMALE	Stage IIA	T2b	M0	N0
TCGA-91-6829	1258	1	78	MALE	Stage IB	T2	MX	N0
TCGA-99-8028	1118	0	50	FEMALE	Stage IA	T1a	M0	N0
TCGA-78-7153	3635	0	65	FEMALE	Stage IB	T2	M0	N0
TCGA-L9-A50W	442	1	75	MALE	Stage IIA	T1b	MX	N1
TCGA-50-6594	370	1	79	FEMALE	Stage IIIA	T3	M0	N2
TCGA-50-5936	257	1	58	MALE	Stage IIIA	T2	M0	N2
TCGA-05-5428	670	0	57	MALE	Stage IIA	T1b	M0	N1
TCGA-55-5899	930	0	58	MALE	unknow	T1a	M0	N1
TCGA-44-7659	691	0	70	MALE	Stage IA	T1b	MX	N0
TCGA-55-7816	468	1	49	FEMALE	Stage IV	TX	MX	NX
TCGA-05-4425	669	0	70	FEMALE	Stage IV	T2	M1	N0
TCGA-44-2665	1301	0	55	FEMALE	Stage IIB	T2	M0	N1
TCGA-05-4424	913	0	70	MALE	Stage IIB	T3	M0	N0
TCGA-78-7156	976	1	62	MALE	Stage IV	T4	M1	N1
TCGA-49-4512	905	1	69	FEMALE	Stage IIIA	T2	MX	N2
TCGA-78-7536	244	1	69	MALE	Stage IIIA	T2	M0	N2
TCGA-97-8175	551	0	55	FEMALE	Stage IB	T2a	M0	N0
TCGA-49-4501	1421	1	67	FEMALE	Stage IB	T2	M0	N0
TCGA-53-7626	929	1	76	FEMALE	Stage IIA	T1	M0	N1
TCGA-55-6984	760	1	71	FEMALE	Stage IIB	T2	M0	N1
TCGA-44-2659	1367	0	65	FEMALE	Stage IIB	T1	M0	N1
TCGA-MP-A4SW	1778	1	53	MALE	Stage IIB	T2	M0	N1
TCGA-55-A48X	689	0	63	FEMALE	Stage IIA	T1b	M0	N1
TCGA-55-1592	701	1	65	MALE	Stage IA	T2	M0	N0
TCGA-86-8673	862	0	61	MALE	Stage IB	T2	M0	N0
TCGA-35-4123	182	0	38	MALE	Stage IA	T1	M0	N0
TCGA-78-8640	7062	0	59	MALE	Stage IIA	T1	M0	N1
TCGA-75-7027	3059	0	unknow	MALE	Stage IB	T2	M0	N0
TCGA-99-8032	44	0	61	MALE	Stage IA	T1a	M0	N0
TCGA-49-6761	354	0	68	FEMALE	Stage IIIA	T1	MX	N2
TCGA-MP-A4SY	1501	1	61	MALE	Stage IIB	T2	M0	N1
TCGA-55-A490	99	1	78	MALE	Stage IIA	T2b	MX	N0
TCGA-93-7348	531	0	75	FEMALE	Stage IA	T1a	MX	N0
TCGA-49-AAR0	4765	0	57	MALE	Stage IA	T1	MX	N0
TCGA-93-A4JP	578	0	64	MALE	Stage IV	TX	M1b	NX
TCGA-55-6979	237	1	59	FEMALE	Stage IIB	T2	M0	N1
TCGA-73-7498	1189	0	58	FEMALE	Stage IA	T1b	M0	N0
TCGA-MP-A4T8	161	1	68	MALE	Stage IIIA	T2	M0	N2
TCGA-50-6590	1288	1	72	FEMALE	Stage IB	T2	M0	N0
TCGA-64-5815	866	0	74	MALE	Stage IIB	T2	M0	N1
TCGA-78-7540	1197	1	66	FEMALE	Stage IB	T2	M0	N0
TCGA-55-8510	539	0	55	FEMALE	Stage IB	T2a	MX	N0
TCGA-44-7671	889	0	64	MALE	Stage IB	T2a	M0	N0
TCGA-91-8496	505	0	63	FEMALE	Stage IB	T2a	MX	NX
TCGA-55-8089	702	1	56	MALE	Stage IA	T1a	M0	N0
TCGA-99-AA5R	658	0	70	FEMALE	Stage IA	T1a	M0	N0
TCGA-55-8505	440	0	62	MALE	Stage IIIA	T1a	MX	N2
TCGA-05-5423	151	0	65	MALE	Stage IIB	T2	M0	N1
TCGA-55-8614	536	0	76	MALE	Stage IB	T2a	MX	N0
TCGA-50-5946	1617	0	62	MALE	Stage IA	T1	MX	N0
TCGA-05-4245	730	0	81	MALE	Stage IIIA	T2	M0	N2
TCGA-91-A4BD	603	0	78	MALE	Stage IIA	T1b	MX	N1
TCGA-55-8512	607	1	41	MALE	Stage IV	T1a	M1b	N1
TCGA-NJ-A55A	15	0	76	FEMALE	Stage IB	T2	M0	N0
TCGA-05-4434	457	1	67	FEMALE	Stage IV	T4	M1	N1
TCGA-97-A4M6	568	0	45	FEMALE	Stage IA	T1a	M0	N0
TCGA-86-7954	605	0	68	FEMALE	Stage IB	T2	M0	N0
TCGA-78-7150	666	1	59	MALE	Stage IIB	T2	M0	N1
TCGA-62-A470	1194	1	84	MALE	Stage IB	T2	M0	N0
TCGA-69-8255	129	0	71	MALE	Stage IA	T1a	M0	N0
TCGA-55-8208	674	0	73	FEMALE	Stage IA	T1b	M0	N0
TCGA-50-5051	478	1	42	FEMALE	Stage IIIA	T2	M0	N2
TCGA-55-7910	1040	0	50	FEMALE	Stage IIA	T2b	M0	N0
TCGA-38-7271	800	1	72	FEMALE	Stage IA	T1	M0	N0
TCGA-86-8585	353	0	57	MALE	Stage IB	T2a	M0	N0
TCGA-86-8075	694	1	66	FEMALE	Stage IB	T2	M0	N0
TCGA-73-4676	281	1	45	MALE	Stage IIA	T2a	M0	N1
TCGA-50-5933	2393	1	72	MALE	Stage IIIB	T4	M0	N2
TCGA-73-4675	922	1	59	MALE	Stage IIIA	T3	M0	N1
TCGA-55-6987	2137	0	77	MALE	Stage IA	T1	M0	N0
TCGA-50-5055	1830	1	79	FEMALE	Stage IIA	T1	M0	N1
TCGA-MN-A4N5	84	0	63	MALE	Stage IA	T1a	M0	N0
TCGA-38-A44F	133	0	80	MALE	Stage IB	T2a	M0	N0
TCGA-55-6971	1400	0	59	FEMALE	Stage IB	T2	MX	N0
TCGA-69-7974	184	0	54	FEMALE	Stage IIIA	T2a	MX	N2
TCGA-44-6779	500	1	50	FEMALE	Stage IIB	T2	MX	N1
TCGA-MP-A4TC	74	1	77	MALE	Stage IIIA	T1	M0	N2
TCGA-55-8302	478	0	54	MALE	Stage IB	T2	MX	N0
TCGA-67-3774	385	0	73	FEMALE	Stage IB	T2	M0	N0
TCGA-55-A493	28	0	54	FEMALE	Stage IB	T2a	M0	N0
TCGA-50-7109	308	1	60	MALE	Stage IA	T1	M0	N0
TCGA-55-6982	995	1	79	FEMALE	Stage IIB	T2	M0	N1
TCGA-86-8074	24	0	62	FEMALE	Stage IIA	T1b	M0	N1
TCGA-69-A59K	591	0	60	FEMALE	Stage IIB	T3	M0	N0
TCGA-55-8090	598	1	80	MALE	Stage IA	T1a	M0	N0
TCGA-97-A4M2	624	0	66	MALE	Stage IA	T1a	M0	N0
TCGA-MP-A4T9	1265	1	54	FEMALE	Stage IIIA	T2	MX	N2
TCGA-MP-A4TK	582	1	56	FEMALE	Stage IIB	T2	MX	N1
TCGA-91-6849	35	0	75	FEMALE	Stage IIIA	T2	MX	N2
TCGA-50-6593	336	1	49	FEMALE	Stage IIIA	T1	M0	N2
TCGA-95-7043	503	1	63	FEMALE	Stage IA	T1a	MX	N0
TCGA-55-7724	705	0	76	FEMALE	Stage IB	T2a	MX	N0
TCGA-53-A4EZ	1071	0	63	MALE	Stage IIA	T2a	MX	N1
TCGA-44-7667	1097	0	49	FEMALE	Stage IIB	T3	MX	N0
TCGA-44-8117	385	0	54	FEMALE	Stage IB	T2a	M0	N0
TCGA-55-6983	2823	0	81	MALE	Stage IIB	T2	M0	N1
TCGA-44-6146	728	0	64	MALE	Stage IIB	T3	M0	N0
TCGA-55-8513	791	0	77	FEMALE	Stage IIB	T3	MX	N0
TCGA-MP-A5C7	2248	0	76	FEMALE	Stage IB	T2	M0	N0
TCGA-75-6214	1115	1	unknow	FEMALE	Stage IIIA	T2	M0	N2
TCGA-86-7713	1157	0	70	MALE	Stage IIA	T2b	M0	N0
TCGA-75-6212	1516	1	unknow	FEMALE	Stage IIB	T2	M0	N1
TCGA-62-8394	139	1	65	FEMALE	Stage IIIB	T4	M0	N2
TCGA-64-5778	1305	0	60	MALE	Stage IB	T2	M0	N0
TCGA-97-8174	164	1	67	MALE	Stage IIA	T2b	M0	N0
TCGA-50-8459	1119	0	68	MALE	Stage IIB	T3	M0	N0
TCGA-50-8457	1125	0	63	FEMALE	Stage IA	T1a	M0	N0
TCGA-97-A4M1	601	0	52	FEMALE	Stage IA	T1a	M0	N0
TCGA-78-7166	258	1	84	MALE	Stage IIB	T2	M0	N1
TCGA-83-5908	824	0	59	FEMALE	Stage IA	T1	M0	N0
TCGA-05-4426	791	0	71	MALE	Stage IB	T2	M0	N0
TCGA-55-7995	889	0	73	FEMALE	Stage IA	T1b	M0	N0
TCGA-93-8067	186	0	77	MALE	Stage IB	T2a	MX	N0
TCGA-55-7284	243	1	74	MALE	Stage IIB	T3	MX	N0
TCGA-55-1595	1479	0	74	FEMALE	Stage IA	T1	M0	N0
TCGA-44-2655	1324	0	65	FEMALE	Stage IA	T1	M0	N0
TCGA-69-8453	813	0	77	MALE	Stage IIB	T3	MX	N0
TCGA-91-6835	79	0	81	FEMALE	Stage IA	T1	M0	N0
TCGA-95-8039	830	0	72	MALE	Stage IA	T1	MX	N0
TCGA-97-7938	18	1	76	FEMALE	Stage IA	T1a	MX	N0
TCGA-69-7978	134	0	59	MALE	Stage IIB	T2b	MX	N1
TCGA-55-7994	603	0	81	MALE	Stage IIB	T3	MX	N0
TCGA-55-8619	416	0	72	FEMALE	Stage IIB	T3	MX	N0
TCGA-78-7149	3940	0	71	MALE	Stage IIIB	T4	M0	N0
TCGA-38-4631	354	1	72	FEMALE	Stage IB	T2	M0	N0
TCGA-44-2662	1280	0	65	MALE	Stage IB	T2	M0	N0
TCGA-MP-A4SV	2620	1	67	MALE	Stage IB	T2	M0	N0
TCGA-L9-A7SV	565	0	69	MALE	Stage IIA	T2a	M0	N1
TCGA-93-A4JQ	526	0	49	MALE	Stage IA	T1b	MX	N0
TCGA-35-3615	14	0	57	MALE	Stage IB	T2	M0	N0
TCGA-05-4418	274	1	69	MALE	Stage IIIA	T3	M0	N2
TCGA-05-4249	1523	0	67	MALE	Stage IB	T2	M0	N0
TCGA-MN-A4N4	1175	0	57	MALE	Stage IA	T1b	M0	N0
TCGA-73-4658	1600	1	80	FEMALE	Stage IB	T2	M0	N0
TCGA-44-A4SS	415	0	73	MALE	Stage IA	T1b	M0	N0
TCGA-95-A4VP	605	0	66	FEMALE	Stage IIIA	T2b	M0	N2
TCGA-55-7914	187	1	71	FEMALE	Stage IIA	T1b	MX	N1
TCGA-78-7145	826	1	52	FEMALE	Stage IV	T4	M1	N1
TCGA-55-8092	154	1	75	MALE	Stage IIB	T3	MX	N0
TCGA-MP-A4TE	896	1	56	MALE	Stage IIA	T2b	MX	N0
TCGA-MP-A4T4	2617	1	68	FEMALE	Stage IIB	T2	M0	N1
TCGA-55-8203	547	0	69	FEMALE	Stage IA	T1b	M0	N0
TCGA-55-6712	171	1	71	MALE	Stage IIA	T2a	MX	N1
TCGA-49-6743	1621	0	81	FEMALE	Stage IIIA	T1	MX	N2
TCGA-73-4668	467	0	66	FEMALE	Stage IIB	T2	M0	N1
TCGA-67-3770	610	0	70	FEMALE	Stage IA	T1	M0	N0
TCGA-64-1680	1126	0	63	MALE	Stage IV	T2a	M1	N2
TCGA-05-4398	1431	0	47	FEMALE	Stage IIIB	T4	M0	N3
TCGA-78-7155	1171	1	68	MALE	Stage IB	T2	M0	N0
TCGA-78-7152	1215	1	65	MALE	Stage IB	T2	M0	N0
TCGA-75-6211		1	unknow	FEMALE	Stage IB	T2	M0	N0
TCGA-MP-A4T6	1790	1	76	FEMALE	Stage IIIA	T1	MX	N2
TCGA-55-A57B	546	0	80	FEMALE	Stage IA	T1b	M0	N0
TCGA-44-2656	1429	0	59	MALE	Stage IB	T2	M0	N0
TCGA-93-A4JO	33	1	70	MALE	Stage IA	T1a	MX	N0
TCGA-78-7535	949	1	45	MALE	Stage IB	T2	M0	N0
TCGA-62-8398	444	1	55	MALE	Stage IIIA	T2	M0	N2
TCGA-91-6840	372	0	59	FEMALE	Stage IA	T1b	M0	N0
TCGA-75-5122		1	unknow	MALE	Stage IB	T2	M0	N0
TCGA-99-8025	1060	0	72	FEMALE	Stage IIIA	T3	M0	N2
TCGA-55-8207	977	0	73	MALE	Stage IB	T2a	MX	N0
TCGA-55-6969	1239	0	52	MALE	Stage IB	T2	M0	N0
TCGA-64-5774	2676	0	60	MALE	Stage IB	T2	M0	N0
TCGA-O1-A52J	1798	1	74	FEMALE	Stage IA	T1	MX	N0
TCGA-86-6851	179	0	73	FEMALE	Stage IIA	T1b	M0	N1
TCGA-62-8395	1216	0	80	FEMALE	Stage IIB	T3	M0	N0
TCGA-86-A4P7	415	0	63	FEMALE	Stage IB	T2a	M0	N0
TCGA-91-6831	310	0	66	MALE	Stage IB	T2	MX	N0
TCGA-05-4420	912	0	41	MALE	Stage IB	T2	M0	N0
TCGA-05-4395	0	1	76	MALE	Stage IIIB	T4	M0	N2
TCGA-67-6217	422	0	73	FEMALE	Stage IIA	T2a	M0	N1
TCGA-44-4112	808	1	60	FEMALE	Stage IB	T2a	M0	N0
TCGA-49-AAR2	2224	0	64	MALE	Stage IB	T2	MX	N0
TCGA-62-A46O	1454	1	65	FEMALE	Stage IB	T2	M0	N0
TCGA-44-7660	592	0	72	MALE	Stage IB	T2	MX	N0
TCGA-44-3919	1026	1	71	FEMALE	Stage IA	T1	M0	N0
TCGA-44-6775	705	0	72	FEMALE	Stage IB	T2a	MX	N0
TCGA-97-7554	775	0	83	FEMALE	Stage IIIA	T2a	M0	N2
TCGA-86-6562	376	1	52	MALE	Stage IIA	T2a	M0	N1
TCGA-55-6642	2449	0	63	MALE	Stage IB	T2	MX	N0
TCGA-62-A471	1246	0	64	MALE	Stage IIB	T2b	M0	N1
TCGA-05-5715	62	0	69	FEMALE	Stage IB	T2a	M0	N0
